# Supplementary material for: Notch Signaling Inhibition by LY411575 Attenuates Osteoblast Differentiation and Decreased Ectopic Bone Formation Capacity of Human Skeletal (Mesenchymal) Stem Cells
Source: Stem Cells Int. 2019 Aug 22;2019:3041262. doi: 10.1155/2019/3041262 (PMC6724428; doi:10.1155/2019/3041262)
Supplement: Supplementary Materials — Supplementary Table 1: list of differentially expressed genes (2.0 FC, P(corr) < 0.05) in human bone marrow mesenchymal stem cells (hBMSCs) differentiated into osteoblasts (day 10) in the presence of LY411575 compared to DMSO. [file 3041262.f1.xlsx]

## Sheet: UP and Down - FC ((C24) vs (DMS
Supplementary Table 1. List of differentiatlly expressed genes (2.0 FC, p corr <0.05) in human bone marrow mesenchymal stem cells (hBMSCs) differentiated into osteoblasts (day 10) in the presence of LY411575 compared to DMSO
ProbeName	FC ([LY411575] vs [DMSO])	Log FC ([LY411575] vs [DMSO])	FC (abs) ([LY411575] vs [DMSO])	Regulation ([LY411575] vs [DMSO])	GeneSymbol	GeneName	ControlType	Description	EntrezGeneID	Go	Chromosome End Index_Avadis_	Chromosome Number_Avadis_	Chromosome Start Index_Avadis_	Chromosome Strand_Avadis_	Cytoband	GenbankAccession	GenomicCoordinates	RefSeqAccession	UniGeneID
GE_BrightCorner	2.50905	1.32714	2.50905	up			pos	Unknown
A_21_P0000509	2.01611	1.01158	2.01611	up	SNAR-G2	small ILF3/NF90-associated RNA G2	FALSE	Homo sapiens small ILF3/NF90-associated RNA G2 (SNAR-G2), small nuclear RNA [NR_024244]	100170228		49534993	chr19	49534934	-	hs|19q13.33	NR_024244	chr19:49534993-49534934	NR_024244	Hs.717308
A_33_P3402773	2.7424	1.45544	2.7424	up			FALSE				24285060	chr22	24285001	+	hs|22q11.23		chr22:024285001-024285060
A_21_P0013668	2.01401	1.01007	2.01401	up	SPATA31C2	SPATA31 subfamily C, member 2	FALSE	Homo sapiens SPATA31 subfamily C, member 2 (SPATA31C2), mRNA [NM_001166137]	645961	GO:0016021|GO:0007283|GO:0030154	90749849	chr9	90749790	-	hs|9q22.1	NM_001166137	chr9:90749849-90749790	NM_001166137	Hs.632070
A_23_P144096	2.77949	1.47482	2.77949	up	CISH	cytokine inducible SH2-containing protein	FALSE	Homo sapiens cytokine inducible SH2-containing protein (CISH), transcript variant 2, mRNA [NM_145071]	1154	GO:0005515|GO:0016567|GO:0005886|GO:0046627|GO:0019221|GO:0060397|GO:0005575|GO:0001558|GO:0046426|GO:0007205|GO:0005829|GO:0035556|GO:0003674|GO:0005737|GO:0004860|GO:0006469	50644082	chr3	50644023	-	hs|3p21.2	NM_145071	chr3:50644082-50644023	NM_145071	Hs.655334
A_33_P3379526	2.69547	1.43054	2.69547	up			FALSE	Homo sapiens cDNA FLJ45698 fis, clone FEBRA2017811. [AK127601]			50271558	chr12	50271499	-	hs|12q13.12	AK127601	chr12:50271558-50271499		Hs.689518
A_21_P0000880	2.03282	1.02348	2.03282	up	SPAG5-AS1	SPAG5 antisense RNA 1	FALSE	Homo sapiens SPAG5 antisense RNA 1 (SPAG5-AS1), long non-coding RNA [NR_040012]	100506436		26944395	chr17	26944336	+	hs|17q11.2	NR_040012	chr17:26944336-26944395	NR_040012	Hs.743630
A_33_P3404480	2.99224	1.58123	2.99224	up	MPP4	membrane protein, palmitoylated 4 (MAGUK p55 subfamily member 4)	FALSE	Homo sapiens membrane protein, palmitoylated 4 (MAGUK p55 subfamily member 4) (MPP4), mRNA [NM_033066]	58538	GO:0042734|GO:0005737|GO:0035418|GO:0005654|GO:0043231	202510065	chr2	202510006	-	hs|2q33.1	NM_033066	chr2:202510065-202510006	NM_033066	Hs.63085
A_21_P0001847	2.21158	1.14508	2.21158	up	lnc-EFR3B-3	lnc-EFR3B-3:1	FALSE	LNCipedia lincRNA (lnc-EFR3B-3), lincRNA [lnc-EFR3B-3:1]			25195691	chr2	25195632	+	hs|2p23.3		chr2:25195632-25195691		Hs.436366
A_33_P3312601	2.35313	1.23458	2.35313	up	AADACL4	arylacetamide deacetylase-like 4	FALSE	Homo sapiens arylacetamide deacetylase-like 4 (AADACL4), mRNA [NM_001013630]	343066	GO:0052689|GO:0008152|GO:0016021	12727097	chr1	12727038	+	hs|1p36.21	NM_001013630	chr1:12727038-12727097	NM_001013630	Hs.209954
A_24_P153043	2.55899	1.35557	2.55899	up	RPL23AP7	ribosomal protein L23a pseudogene 7	FALSE	Homo sapiens ribosomal protein L23a pseudogene 7 (RPL23AP7), transcript variant 3, non-coding RNA [NR_000029]	118433		114368843	chr2	114368816	-	hs|2q13	NR_000029	chr2:114368843-114368816	NR_000029	Hs.595056
A_21_P0008647	2.13514	1.09433	2.13514	up	LOC145837	uncharacterized LOC145837	FALSE	Homo sapiens uncharacterized LOC145837 (LOC145837), long non-coding RNA [NR_026979]	145837		69855609	chr15	69855550	+	hs|15q23	NR_026979	chr15:69855550-69855609	NR_026979	Hs.410126
A_23_P7535	2.9569	1.56408	2.9569	up	HRH2	histamine receptor H2	FALSE	Homo sapiens histamine receptor H2 (HRH2), transcript variant 2, mRNA [NM_022304]	3274	GO:0003382|GO:0005886|GO:0048565|GO:0001697|GO:0004969|GO:0001698|GO:0006955|GO:0045907|GO:0005887|GO:0007187|GO:0048167|GO:0048732|GO:0008542|GO:0007613	175110850	chr5	175110791	+	hs|5q35.2	NM_022304	chr5:175110791-175110850	NM_022304	Hs.247885
A_23_P31073	2.06435	1.04569	2.06435	up	MYB	v-myb avian myeloblastosis viral oncogene homolog	FALSE	Homo sapiens v-myb avian myeloblastosis viral oncogene homolog (MYB), transcript variant 2, mRNA [NM_005375]	4602	GO:0005515|GO:0048538|GO:0016363|GO:0005829|GO:0048872|GO:0000082|GO:0071987|GO:0045944|GO:0030183|GO:0071354|GO:0006816|GO:0006338|GO:0006355|GO:0000122|GO:0048566|GO:0000978|GO:0001701|GO:0006351|GO:0051574|GO:0001077|GO:0051571|GO:0007596|GO:0003682|GO:0045624|GO:0045893|GO:0045892	135540282	chr6	135540223	+	hs|6q23.3	NM_005375	chr6:135540223-135540282	NM_005375	Hs.606320
A_21_P0000144	2.60317	1.38027	2.60317	up	LOC100505478	uncharacterized LOC100505478	FALSE	Homo sapiens uncharacterized LOC100505478 (LOC100505478), mRNA [NM_001199233]	100505478		117428781	chr9	117428722	-	hs|9q32	NM_001199233	chr9:117428781-117428722	NM_001199233	Hs.200101
A_21_P0011326	2.22812	1.15582	2.22812	up	XLOC_l2_004706		FALSE	BROAD Institute lincRNA (XLOC_l2_004706), lincRNA [TCONS_l2_00008703]			69355078	chr15	69355019	+	hs|15q23		chr15:69355019-69355078
A_23_P13907	2.82644	1.49899	2.82644	up	IGF1	insulin-like growth factor 1 (somatomedin C)	FALSE	Homo sapiens insulin-like growth factor 1 (somatomedin C) (IGF1), transcript variant 4, mRNA [NM_000618]	3479	GO:0010468|GO:0005515|GO:0033160|GO:0009408|GO:0005159|GO:0005158|GO:0046579|GO:0030879|GO:0005615|GO:0030104|GO:0046326|GO:0045445|GO:0045821|GO:0014834|GO:0045740|GO:0030168|GO:0045840|GO:0014068|GO:0014904|GO:0030166|GO:0001501|GO:0007517|GO:0005178|GO:0005179|GO:0043388|GO:0010001|GO:0045893|GO:0044267|GO:0008083|GO:0035630|GO:0008284|GO:0008285|GO:0005886|GO:0032878|GO:0006928|GO:0021940|GO:…	102796325	chr12	102796266	-	hs|12q23.2	NM_000618	chr12:102796325-102796266	NM_000618	Hs.160562
A_33_P3388070	3.75535	1.90895	3.75535	up			FALSE	DB226000 TRACH3 Homo sapiens cDNA clone TRACH3018100 5', mRNA sequence [DB226000]			112111461	chr13	112111402	-	hs|13q34	DB226000	chr13:112111461-112111402		Hs.577832
A_21_P0003137	2.24479	1.16658	2.24479	up	MTRNR2L2	MT-RNR2-like 2	FALSE	Homo sapiens MT-RNR2-like 2 (MTRNR2L2), mRNA [NM_001190470]	100462981	GO:0005737|GO:0005576	79946437	chr5	79946378	-	hs|5q14.1	NM_001190470	chr5:79946437-79946378	NM_001190470	Hs.666077
A_33_P3229012	2.2582	1.17517	2.2582	up			FALSE				78949	chrUn_gl000225	78890	+			chrUn_gl000225:000078890-000078949
A_33_P3409553	2.17557	1.12139	2.17557	up			FALSE				16119654	chr1	16119595	+	hs|1p36.21		chr1:16119595-16119654
A_33_P3240497	2.21777	1.14911	2.21777	up			FALSE	Homo sapiens cDNA FLJ38411 fis, clone FEBRA2009352. [AK095730]			45349927	chr1	45349868	-	hs|1p34.1	AK095730	chr1:45349927-45349868
A_23_P59285	3.00032	1.58512	3.00032	up	GCM2	glial cells missing homolog 2 (Drosophila)	FALSE	Homo sapiens glial cells missing homolog 2 (Drosophila) (GCM2), mRNA [NM_004752]	9247	GO:0006355|GO:0043066|GO:0071310|GO:0006874|GO:0005634|GO:0007275|GO:0003677|GO:0006351|GO:0030154|GO:0046872|GO:0043565|GO:0060017|GO:0030643	10874189	chr6	10874130	-	hs|6p24.2	NM_004752	chr6:10874189-10874130	NM_004752	Hs.227098
A_23_P113393	4.3304	2.1145	4.3304	up	APLN	apelin	FALSE	Homo sapiens apelin (APLN), mRNA [NM_017413]	8862	GO:0007165|GO:0006955|GO:0001664|GO:0007595|GO:0005179|GO:0023052|GO:0005102|GO:0005576|GO:0005615|GO:0031704	128779470	chrX	128779411	-	hs|Xq26.1	NM_017413	chrX:128779470-128779411	NM_017413	Hs.303084
A_33_P3344991	2.58589	1.37066	2.58589	up	TBC1D3L	TBC1 domain family, member 3L	FALSE	Homo sapiens cDNA FLJ16441 fis, clone BRAMY3003205, highly similar to TBC1 domain family member 3. [AK122833]	101060376		36286863	chr17	36286804	+	hs|17q12	AK122833	chr17:36286804-36286863
A_32_P516818	2.15147	1.10532	2.15147	up	PQLC2L	PQ loop repeat containing 2-like	FALSE	Homo sapiens PQ loop repeat containing 2-like (PQLC2L), transcript variant 5, mRNA [NM_001243729]	152078		157271051	chr3	157261272	+	hs|3q25.32	NM_001243729	chr3:157261272-157271051	NM_001243729	Hs.259046
ERCC-00117_139	3.93672	1.97699	3.93672	up			pos
A_21_P0003648	4.52127	2.17673	4.52127	up	lnc-SPATA5-2	lnc-SPATA5-2:1	FALSE	LNCipedia lincRNA (lnc-SPATA5-2), lincRNA [lnc-SPATA5-2:1]			124249525	chr4	124249466	+	hs|4q28.1		chr4:124249466-124249525
A_23_P121253	4.34585	2.11964	4.34585	up	TNFSF10	tumor necrosis factor (ligand) superfamily, member 10	FALSE	Homo sapiens tumor necrosis factor (ligand) superfamily, member 10 (TNFSF10), transcript variant 1, mRNA [NM_003810]	8743	GO:0005515|GO:0032868|GO:0005164|GO:2001238|GO:2001239|GO:0043065|GO:0006919|GO:0005102|GO:0007267|GO:0006915|GO:0005576|GO:0097190|GO:0005125|GO:0005615|GO:0046872|GO:0043280|GO:0007165|GO:0006955|GO:0005887|GO:0090200|GO:0043123|GO:0008584|GO:0070062	172223925	chr3	172223866	-	hs|3q26.31	NM_003810	chr3:172223925-172223866	NM_003810	Hs.478275
A_33_P3627001	2.96777	1.56938	2.96777	up	PEBP4	phosphatidylethanolamine-binding protein 4	FALSE	Homo sapiens phosphatidylethanolamine-binding protein 4 (PEBP4), mRNA [NM_144962]	157310	GO:0005515|GO:0005764|GO:0070062	22570843	chr8	22570784	-	hs|8p21.3	NM_144962	chr8:22570843-22570784	NM_144962	Hs.491242
A_24_P606663	2.92691	1.54938	2.92691	up			FALSE	ribosomal protein L31 pseudogene 35 [Source:HGNC Symbol;Acc:HGNC:36932] [ENST00000431058]			54724363	chr7	54724304	+	hs|7p11.2		chr7:54724304-54724363
A_21_P0010801	2.56403	1.35841	2.56403	up	XLOC_l2_001421		FALSE	BROAD Institute lincRNA (XLOC_l2_001421), lincRNA [TCONS_l2_00002836]			988734	chr10	988675	+	hs|10p15.3		chr10:988675-988734
A_21_P0005693	3.01836	1.59377	3.01836	up	LOC101929217	uncharacterized LOC101929217	FALSE	Homo sapiens uncharacterized LOC101929217 (LOC101929217), long non-coding RNA [NR_105004]	101929217		49536428	chr8	49536369	+	hs|8q11.21	NR_105004	chr8:49536369-49536428	NR_105004
A_21_P0002048	2.38628	1.25476	2.38628	up	LINC01121	long intergenic non-protein coding RNA 1121	FALSE	long intergenic non-protein coding RNA 1121 [Source:HGNC Symbol;Acc:HGNC:49266] [ENST00000427020]	400952		45392072	chr2	45392013	-	hs|2p21	XR_425396	chr2:45392072-45392013	XR_425396
A_33_P3347040	2.23223	1.15848	2.23223	up	DPP9-AS1	DPP9 antisense RNA 1	FALSE	Homo sapiens DPP9 antisense RNA 1 (DPP9-AS1), mRNA [NM_001242901]	100131094		4685929	chr19	4685870	+	hs|19p13.3	NM_001242901	chr19:4685870-4685929	NM_001242901	Hs.678135
A_21_P0010493	2.89436	1.53324	2.89436	up			FALSE	Homo sapiens cDNA FLJ41501 fis, clone BRTHA2006975. [AK123495]			83422	chr7_gl000195_random	83363	-			chr7_gl000195_random:83422-83363		Hs.743984
A_21_P0002930	2.20472	1.1406	2.20472	up	lnc-TSEN2-1	lnc-TSEN2-1:2	FALSE	LNCipedia lincRNA (lnc-TSEN2-1), lincRNA [lnc-TSEN2-1:2]			12518009	chr3	12517950	+	hs|3p25.2		chr3:12517950-12518009
A_21_P0012591	2.03116	1.0223	2.03116	up	UGT2B11	UDP glucuronosyltransferase 2 family, polypeptide B11	FALSE	Homo sapiens UDP glucuronosyltransferase 2 family, polypeptide B11 (UGT2B11), mRNA [NM_001073]	10720	GO:0008210|GO:0052696|GO:0006805|GO:0009813|GO:0005789|GO:0015020|GO:0016021|GO:0032870|GO:0043231	70066280	chr4	70066221	-	hs|4q13.2	NM_001073	chr4:70066280-70066221	NM_001073	Hs.339811
A_21_P0011876	2.26909	1.18211	2.26909	up	LOC102725407	uncharacterized LOC102725407	FALSE	PREDICTED: Homo sapiens uncharacterized LOC102725407 (LOC102725407), transcript variant X2, ncRNA [XR_425533]	102725407		223186239	chr2	223185543	+	hs|2q36.1		chr2:223185543-223186239	XR_425533
A_21_P0009950	2.06407	1.04549	2.06407	up	lnc-SSTR4-2	lnc-SSTR4-2:4	FALSE	LNCipedia lincRNA (lnc-SSTR4-2), lincRNA [lnc-SSTR4-2:4]			23167042	chr20	23161800	+	hs|20p11.21		chr20:23161800-23167042
A_23_P142255	2.03278	1.02345	2.03278	up	SHD	Src homology 2 domain containing transforming protein D	FALSE	Homo sapiens Src homology 2 domain containing transforming protein D (SHD), mRNA [NM_020209]	56961	GO:0005515	4290705	chr19	4290646	+	hs|19p13.3	NM_020209	chr19:4290646-4290705	NM_020209	Hs.7423
A_32_P175934	3.91034	1.96729	3.91034	up	CD48	CD48 molecule	FALSE	Homo sapiens CD48 molecule (CD48), transcript variant 1, mRNA [NM_001778]	962	GO:0005515|GO:0016020|GO:0005886|GO:0007596|GO:0005887|GO:0045121|GO:0006952|GO:0004872|GO:0031225|GO:0050900|GO:0070062	160654741	chr1	160654682	-	hs|1q23.3	NM_001778	chr1:160654741-160654682	NM_001778	Hs.243564
A_23_P113613	2.18405	1.127	2.18405	up	CDCP1	CUB domain containing protein 1	FALSE	Homo sapiens CUB domain containing protein 1 (CDCP1), transcript variant 1, mRNA [NM_022842]	64866	GO:0005886|GO:0005576|GO:0016021	45123898	chr3	45123839	-	hs|3p21.31	NM_022842	chr3:45123898-45123839	NM_022842	Hs.476093
A_33_P3230788	2.06821	1.04838	2.06821	up	MUSK	muscle, skeletal, receptor tyrosine kinase	FALSE	muscle, skeletal, receptor tyrosine kinase [Source:HGNC Symbol;Acc:HGNC:7525] [ENST00000374439]	4593	GO:0005515|GO:0006355|GO:0031594|GO:0030054|GO:0018108|GO:0007275|GO:0005524|GO:2000541|GO:0030154|GO:0043235|GO:0010628|GO:0046777|GO:0043525|GO:0030198|GO:0005887|GO:0007528|GO:0045211|GO:0001934|GO:0007613|GO:0004713|GO:0004714|GO:0008582|GO:0007169|GO:0071340	113468432	chr9	113468373	+	hs|9q31.3		chr9:113468373-113468432
A_21_P0000163	2.80322	1.48708	2.80322	up	RNF223	ring finger protein 223	FALSE	Homo sapiens ring finger protein 223 (RNF223), mRNA [NM_001205252]	401934	GO:0008270|GO:0016021	1007773	chr1	1007714	-	hs|1p36.33	NM_001205252	chr1:1007773-1007714	NM_001205252	Hs.568137
A_23_P401076	7.41912	2.89125	7.41912	up	SUSD3	sushi domain containing 3	FALSE	Homo sapiens sushi domain containing 3 (SUSD3), transcript variant 1, mRNA [NM_145006]	203328	GO:0016021	95847363	chr9	95847304	+	hs|9q22.31	NM_145006	chr9:95847304-95847363	NM_145006	Hs.88417
A_21_P0000033	3.51815	1.81482	3.51815	up	ANKRD66	ankyrin repeat domain 66	FALSE	Homo sapiens ankyrin repeat domain 66 (ANKRD66), mRNA [NM_001162435]	100287718		46726955	chr6	46726896	+	hs|6p12.3	NM_001162435	chr6:46726896-46726955	NM_001162435	Hs.736491
A_33_P3261953	2.23479	1.16014	2.23479	up	LOC100996349	testis expressed 264 pseudogene	FALSE	Homo sapiens testis expressed 264 pseudogene (LOC100996349), non-coding RNA [NR_103470]	100996349		22791240	chr19	22791181	+	hs|19p12	NR_103470	chr19:22791181-22791240	NR_103470	Hs.446176
A_33_P3350748	2.54476	1.34753	2.54476	up	KRT7	keratin 7, type II	FALSE	Homo sapiens keratin 7, type II (KRT7), mRNA [NM_005556]	3855	GO:0005882|GO:0005515|GO:0005737|GO:0005198|GO:0016032|GO:0005634|GO:0045095|GO:0070062	52642649	chr12	52642590	+	hs|12q13.13	NM_005556	chr12:52642590-52642649	NM_005556	Hs.411501
A_21_P0014502	2.23357	1.15935	2.23357	up			FALSE	Homo sapiens antigen MMSA-4 mRNA sequence. [AY952884]			45911491	chr13	45911432	+	hs|13q14.13	AY952884	chr13:45911432-45911491		Hs.374596
A_33_P3258593	2.76989	1.46983	2.76989	up	PRB1	proline-rich protein BstNI subfamily 1	FALSE	Homo sapiens proline-rich protein BstNI subfamily 1 (PRB1), transcript variant 1, mRNA [NM_005039]	5542	GO:0008150|GO:0003674|GO:0005576	11506291	chr12	11506232	-	hs|12p13.2	NM_005039	chr12:11506291-11506232	NM_005039	Hs.631726
A_24_P238250	3.84061	1.94134	3.84061	up	LGALS7	lectin, galactoside-binding, soluble, 7	FALSE	Homo sapiens lectin, galactoside-binding, soluble, 7 (LGALS7), mRNA [NM_002307]	3963		39261714	chr19	39261655	-	hs|19q13.2	NM_002307	chr19:39261714-39261655	NM_002307	Hs.702546
A_33_P3364289	2.11429	1.08017	2.11429	up	HSH2D	hematopoietic SH2 domain containing	FALSE	Homo sapiens hematopoietic SH2 domain containing (HSH2D), transcript variant 2, mRNA [NM_001291274]	84941	GO:0005739|GO:0005515|GO:0042110|GO:0051902|GO:0005070|GO:0002903|GO:0009967|GO:0005634|GO:0005829	16268410	chr19	16268351	+	hs|19p13.12	NM_001291274	chr19:16268351-16268410	NM_001291274	Hs.631617
A_33_P3419113	2.41241	1.27048	2.41241	up	PRY2	PTPN13-like, Y-linked 2	FALSE	Homo sapiens PTPN13-like, Y-linked 2 (PRY2), mRNA [NM_001002758]	442862		24242151	chrY	24242092	-	hs|Yq11.223	NM_001002758	chrY:24242151-24242092	NM_001002758	Hs.632847
A_24_P195272	3.12133	1.64216	3.12133	up			FALSE	GB			36705135	chr6	36705076	+	hs|6p21.2		chr6:36705076-36705135
A_23_P302060	2.16126	1.11187	2.16126	up	IFNE	interferon, epsilon	FALSE	Homo sapiens interferon, epsilon (IFNE), mRNA [NM_176891]	338376	GO:0005132|GO:0019221|GO:0033141|GO:0045343|GO:0005125|GO:0005615|GO:0002250|GO:0051607|GO:0042100|GO:0045087|GO:0006959|GO:0030183|GO:0043330|GO:0002286|GO:0042742|GO:0002323	21481161	chr9	21481102	-	hs|9p21.3	NM_176891	chr9:21481161-21481102	NM_176891	Hs.682604
A_23_P206760	10.996	3.45891	10.996	up	HP	haptoglobin	FALSE	Homo sapiens haptoglobin (HP), transcript variant 1, mRNA [NM_005143]	3240	GO:0005515|GO:2000296|GO:0042542|GO:0016209|GO:0051354|GO:0072562|GO:0005576|GO:0006952|GO:0006953|GO:0003824|GO:0005615|GO:0006898|GO:0030492|GO:0031838|GO:0071682|GO:0008152|GO:0010942|GO:0042742|GO:0070062|GO:0002376	72094936	chr16	72094877	+	hs|16q22.2	NM_005143	chr16:72094877-72094936	NM_005143	Hs.513711
A_23_P117298	2.14119	1.09842	2.14119	up	F7	coagulation factor VII (serum prothrombin conversion accelerator)	FALSE	Homo sapiens coagulation factor VII (serum prothrombin conversion accelerator) (F7), transcript variant 1, mRNA [NM_000131]	2155	GO:0005515|GO:0051897|GO:0043627|GO:0005886|GO:0004252|GO:0031100|GO:0005615|GO:0050927|GO:0001948|GO:0006508|GO:0010641|GO:0060416|GO:0030335|GO:0005796|GO:0005509|GO:0005102|GO:0005576|GO:0031982|GO:0002690|GO:0017187|GO:0007596|GO:0030194|GO:0007598|GO:0005788|GO:0007623|GO:0008236|GO:0032571|GO:0044267|GO:0043687	113773937	chr13	113773878	+	hs|13q34	NM_000131	chr13:113773878-113773937	NM_000131	Hs.36989
A_19_P00318593	2.10276	1.07228	2.10276	up	LOC101928858	uncharacterized LOC101928858	FALSE	PREDICTED: Homo sapiens uncharacterized LOC101928858 (RP11-434D9.1), transcript variant X3, ncRNA [XR_427726]	101928858		67100990	chr5	67100931	+	hs|5q13.1	XR_427726	chr5:67100931-67100990	XR_427726
A_24_P383478	2.48433	1.31286	2.48433	up	ESR1	estrogen receptor 1	FALSE	Homo sapiens estrogen receptor 1 (ESR1), transcript variant 1, mRNA [NM_000125]	2099	GO:0005515|GO:0010467|GO:0043627|GO:0006367|GO:0003700|GO:0008013|GO:0003707|GO:0042802|GO:0002064|GO:0005496|GO:0032355|GO:0043124|GO:0005794|GO:0035327|GO:0000978|GO:0060687|GO:0001547|GO:0048386|GO:0051000|GO:0005654|GO:0008270|GO:0019899|GO:0008134|GO:0060065|GO:0005886|GO:0060068|GO:0007200|GO:0030284|GO:0005634|GO:0038052|GO:0048146|GO:0007204|GO:0043433|GO:0045429|GO:0034056|GO:0051091|GO:…	152129107	chr6	152129048	+	hs|6q25.1	NM_000125	chr6:152129048-152129107	NM_000125	Hs.208124
A_21_P0010313	22.975	4.522	22.975	up	lnc-MX1-3	lnc-MX1-3:4	FALSE	LNCipedia lincRNA (lnc-MX1-3), lincRNA [lnc-MX1-3:4]			43137462	chr21	43137403	+	hs|21q22.3		chr21:43137403-43137462
A_23_P397376	2.08172	1.05778	2.08172	up	MAF	v-maf avian musculoaponeurotic fibrosarcoma oncogene homolog	FALSE	Homo sapiens v-maf avian musculoaponeurotic fibrosarcoma oncogene homolog (MAF), transcript variant 2, mRNA [NM_001031804]	4094	GO:0048839|GO:0006366|GO:0070306|GO:0005634|GO:0032330|GO:0000122|GO:0001228|GO:0001816|GO:0043565|GO:0005737|GO:0045944|GO:0048468|GO:0000785	79628317	chr16	79628258	-	hs|16q23.2	NM_001031804	chr16:79628317-79628258	NM_001031804	Hs.134859
A_33_P3286973	2.39116	1.25771	2.39116	up	TAS1R3	taste receptor, type 1, member 3	FALSE	taste receptor, type 1, member 3 [Source:HGNC Symbol;Acc:HGNC:15661] [ENST00000339381]	83756	GO:0046982|GO:0007186|GO:0005886|GO:0008527|GO:0001582|GO:0033041|GO:0016021|GO:0050916|GO:0050917	1270401	chr1	1270342	+	hs|1p36.33	AK122959	chr1:1270342-1270401		Hs.74375
A_23_P26468	10.8152	3.43499	10.8152	up	RHBDL1	rhomboid, veinlet-like 1 (Drosophila)	FALSE	Homo sapiens rhomboid, veinlet-like 1 (Drosophila) (RHBDL1), transcript variant 1, mRNA [NM_001278720]	9028	GO:0007165|GO:0016020|GO:0004252|GO:0005887|GO:0006508	726988	chr16	726855	+	hs|16p13.3	NM_001278720	chr16:726855-726988	NM_001278720	Hs.137572
A_21_P0000109	2.08877	1.06265	2.08877	up	MTRNR2L9	MT-RNR2-like 9 (pseudogene)	FALSE	Homo sapiens MT-RNR2-like 9 (pseudogene) (MTRNR2L9), mRNA [NM_001190706]	100463487	GO:0005737|GO:0005576	62284530	chr6	62284471	+	hs|6q11.1	NM_001190706	chr6:62284471-62284530	NM_001190706
A_21_P0010023	2.37899	1.25035	2.37899	up			FALSE				23499337	chr20	23499278	-	hs|20p11.21		chr20:23499337-23499278
A_24_P190168	2.11439	1.08024	2.11439	up	TMEM97	transmembrane protein 97	FALSE	Homo sapiens transmembrane protein 97 (TMEM97), mRNA [NM_014573]	27346	GO:0042632|GO:0005791|GO:0005515|GO:0031965|GO:0005886|GO:0016021|GO:0005764|GO:0001558	26654983	chr17	26654924	+	hs|17q11.2	NM_014573	chr17:26654924-26654983	NM_014573	Hs.199695
A_23_P15798	2.09125	1.06436	2.09125	up	KRTAP4-12	keratin associated protein 4-12	FALSE	Homo sapiens keratin associated protein 4-12 (KRTAP4-12), mRNA [NM_031854]	83755	GO:0005515|GO:0045095	39279576	chr17	39279517	-	hs|17q21.2	NM_031854	chr17:39279576-39279517	NM_031854	Hs.572443
A_23_P127721	2.33476	1.22327	2.33476	up	P2RX3	purinergic receptor P2X, ligand gated ion channel, 3	FALSE	Homo sapiens purinergic receptor P2X, ligand gated ion channel, 3 (P2RX3), mRNA [NM_002559]	5024	GO:0009408|GO:0010524|GO:0009409|GO:0019228|GO:0050850|GO:0005639|GO:0009743|GO:0050909|GO:0043197|GO:0048167|GO:0043195|GO:0006810|GO:0043025|GO:0001614|GO:0033198|GO:0051260|GO:0014832|GO:0005791|GO:0035590|GO:0001666|GO:0005794|GO:0004931|GO:0007274|GO:0005524|GO:0030432|GO:0009612|GO:0043235|GO:0007165|GO:0005887|GO:0045121|GO:0048266	57117269	chr11	57116158	+	hs|11q12.1	NM_002559	chr11:57116158-57117269	NM_002559	Hs.146738
A_23_P416751	2.24945	1.16957	2.24945	up	ZNF610	zinc finger protein 610	FALSE	Homo sapiens zinc finger protein 610 (ZNF610), transcript variant 3, mRNA [NM_173530]	162963	GO:0006355|GO:0005634|GO:0003677|GO:0046872|GO:0006351	52870080	chr19	52870021	+	hs|19q13.41	NM_173530	chr19:52870021-52870080	NM_173530	Hs.147025
A_33_P3224020	2.72278	1.44508	2.72278	up	ARAFP2	ARAF pseudogene 2	FALSE	Homo sapiens v-raf murine sarcoma 3611 viral oncogene homolog pseudogene, mRNA (cDNA clone IMAGE:5295529). [BC033982]	644000		62865027	chr7	62864968	-	hs|7q11.21	BC033982	chr7:62865027-62864968
A_21_P0012880	2.26298	1.17822	2.26298	up	BRD9	bromodomain containing 9	FALSE	bromodomain containing 9 [Source:HGNC Symbol;Acc:HGNC:25818] [ENST00000493082]	65980	GO:0008150|GO:0006355|GO:0070577|GO:0005575|GO:0003676|GO:0006351|GO:0016568	880158	chr5	880099	-	hs|5p15.33		chr5:880158-880099
A_33_P3324409	2.04682	1.03338	2.04682	up			FALSE	tripartite motif containing 53C, pseudogene [Source:HGNC Symbol;Acc:HGNC:43979] [ENST00000531490]			49007510	chr11	49007451	-	hs|11p11.12		chr11:49007510-49007451
A_33_P3287113	2.45432	1.29532	2.45432	up	UVSSA	UV-stimulated scaffold protein A	FALSE	UV-stimulated scaffold protein A [Source:HGNC Symbol;Acc:HGNC:29304] [ENST00000503548]	57654	GO:0005515|GO:0016567|GO:0006283|GO:0005694|GO:0000993|GO:0009411	1374518	chr4	1374459	+	hs|4p16.3	XM_006713899	chr4:1374459-1374518	XM_006713899
A_21_P0005248	2.32489	1.21716	2.32489	up	lnc-ASB4-3	lnc-ASB4-3:2	FALSE	LNCipedia lincRNA (lnc-ASB4-3), lincRNA [lnc-ASB4-3:2]			95236456	chr7	95236397	+	hs|7q21.3		chr7:95236397-95236456
A_23_P205713	2.80359	1.48727	2.80359	up	STXBP6	syntaxin binding protein 6 (amisyn)	FALSE	Homo sapiens syntaxin binding protein 6 (amisyn) (STXBP6), mRNA [NM_014178]	29091	GO:0045920|GO:0005737|GO:0035542|GO:0016021|GO:0016192	25288249	chr14	25281886	-	hs|14q12	NM_014178	chr14:25288249-25281886	NM_014178	Hs.508958
A_19_P00800244	2.22772	1.15557	2.22772	up			FALSE				9498900	chr12	9498841	+	hs|12p13.31		chr12:009498841-009498900
A_23_P108501	2.36257	1.24036	2.36257	up	EPHA4	EPH receptor A4	FALSE	Homo sapiens EPH receptor A4 (EPHA4), mRNA [NM_004438]	2043	GO:0005515|GO:0030424|GO:0097161|GO:0030054|GO:0031594|GO:0005886|GO:0008347|GO:0005783|GO:0005741|GO:0030175|GO:0030425|GO:0042802|GO:0005005|GO:0005737|GO:0005004|GO:0046777|GO:0032314|GO:0048681|GO:0043197|GO:0007411|GO:0045211|GO:0007628|GO:0043204|GO:0043679|GO:0043507|GO:0061001|GO:0007155|GO:0097156|GO:0097155|GO:0032317|GO:0005794|GO:0048013|GO:0009986|GO:0021957|GO:2001108|GO:0014069|GO:…	222290776	chr2	222290717	-	hs|2q36.1	NM_004438	chr2:222290776-222290717	NM_004438	Hs.371218
A_33_P3357199	2.13429	1.09375	2.13429	up	SH2D6	SH2 domain containing 6	FALSE	Homo sapiens SH2 domain containing 6 (SH2D6), mRNA [NM_198482]	284948		85664150	chr2	85664091	+	hs|2p11.2	NM_198482	chr2:85664091-85664150	NM_198482	Hs.209542
A_33_P3416231	2.26248	1.17791	2.26248	up	HOXA9	homeobox A9	FALSE	Homo sapiens homeobox A9 (HOXA9), mRNA [NM_152739]	3205	GO:0005515|GO:0005667|GO:0060065|GO:0006355|GO:0048706|GO:0060216|GO:0030879|GO:0005634|GO:0007275|GO:0009954|GO:0007283|GO:0009952|GO:0006351|GO:0043565|GO:0007338|GO:0005737|GO:0045638|GO:0042118|GO:0005654|GO:0035115|GO:0019899|GO:0008584	27203204	chr7	27203145	-	hs|7p15.2	NM_152739	chr7:27203204-27203145	NM_152739	Hs.659350
A_21_P0009828	5.26218	2.39566	5.26218	up	lnc-C20orf187-2	lnc-C20orf187-2:3	FALSE	LNCipedia lincRNA (lnc-C20orf187-2), lincRNA [lnc-C20orf187-2:3]			10847778	chr20	10847719	+	hs|20p12.2		chr20:10847719-10847778
A_33_P3291329	2.15393	1.10697	2.15393	up			FALSE				47093168	chr7	47093109	+	hs|7p12.3		chr7:47093109-47093168
A_21_P0000447	2.05838	1.04151	2.05838	up	SNORD116-11	small nucleolar RNA, C/D box 116-11	FALSE	Homo sapiens small nucleolar RNA, C/D box 116-11 (SNORD116-11), small nucleolar RNA [NR_003326]	100033423		25321168	chr15	25321109	+	hs|15q11.2	NR_003326	chr15:25321109-25321168	NR_003326
A_21_P0014371	2.00558	1.00402	2.00558	up	LOC100506114	uncharacterized LOC100506114	FALSE	PREDICTED: Homo sapiens uncharacterized LOC100506114 (LOC100506114), ncRNA [XR_172297]	100506114		50990154	chr19	50990095	-	hs|19q13.33	XR_172297	chr19:50990154-50990095	XR_172297	Hs.632921
A_33_P3309526	4.48729	2.16584	4.48729	up	PTPRC	protein tyrosine phosphatase, receptor type, C	FALSE	Homo sapiens protein tyrosine phosphatase, receptor type, C (PTPRC), transcript variant 1, mRNA [NM_002838]	5788	GO:0050853|GO:0005515|GO:0050852|GO:0050857|GO:0005886|GO:0030890|GO:0048539|GO:0048864|GO:0035335|GO:0002378|GO:0051607|GO:0006470|GO:0001960|GO:0005001|GO:0002244|GO:0007411|GO:0042100|GO:0006933|GO:0045860|GO:0042102|GO:0051726|GO:0004725|GO:0070062|GO:0051209|GO:0019901|GO:2000648|GO:0016020|GO:0030217|GO:0005887|GO:0016311|GO:0001915|GO:0045121|GO:0006469|GO:2000473|GO:0005925|GO:0007166|GO:…	198725600	chr1	198725541	+	hs|1q32.1	NM_002838	chr1:198725541-198725600	NM_002838	Hs.654514
A_23_P6561	2.3939	1.25936	2.3939	up	EBLN2	endogenous Bornavirus-like nucleoprotein 2	FALSE	Homo sapiens endogenous Bornavirus-like nucleoprotein 2 (EBLN2), mRNA [NM_018029]	55096		73112458	chr3	73112399	+	hs|3p13	NM_018029	chr3:73112399-73112458	NM_018029	Hs.658858
A_21_P0002768	2.04216	1.03009	2.04216	up			FALSE	603075994F1 NIH_MGC_119 Homo sapiens cDNA clone IMAGE:5168014 5', mRNA sequence [BI826287]			127209519	chr3	127209460	+	hs|3q21.3		chr3:127209460-127209519		Hs.581602
A_23_P157914	2.54879	1.34981	2.54879	up	MAMDC2	MAM domain containing 2	FALSE	Homo sapiens MAM domain containing 2 (MAMDC2), transcript variant 1, mRNA [NM_153267]	256691	GO:0019800|GO:0016020|GO:0005783|GO:0005539|GO:0005614	72840711	chr9	72833499	+	hs|9q21.12	NM_153267	chr9:72833499-72840711	NM_153267	Hs.547172
A_33_P3411325	2.34447	1.22926	2.34447	up			FALSE	Q8IVL5_HUMAN (Q8IVL5) Leprecan-like 1 protein, partial (3%) [THC2668129]			32252763	chr16	32252704	-	hs|16p11.2		chr16:032252763-032252704
A_33_P3362153	3.52146	1.81618	3.52146	up	TMEM238	transmembrane protein 238	FALSE	Homo sapiens transmembrane protein 238 (TMEM238), mRNA [NM_001190764]	388564	GO:0016021	55890672	chr19	55890613	-	hs|19q13.42	NM_001190764	chr19:55890672-55890613	NM_001190764	Hs.534672
A_32_P108254	2.05677	1.04038	2.05677	up	FAM20A	family with sequence similarity 20, member A	FALSE	Homo sapiens family with sequence similarity 20, member A (FAM20A), transcript variant 1, mRNA [NM_017565]	54757	GO:0005794|GO:0070166|GO:0005623|GO:0070062|GO:0055074	66533427	chr17	66533368	-	hs|17q24.2	NM_017565	chr17:66533427-66533368	NM_017565	Hs.268874
A_21_P0007422	2.35141	1.23353	2.35141	up	lnc-RP11-890B15.2.1-2	lnc-RP11-890B15.2.1-2:1	FALSE	LNCipedia lincRNA (lnc-RP11-890B15.2.1-2), lincRNA [lnc-RP11-890B15.2.1-2:1]			130650622	chr11	130650563	-	hs|11q24.3		chr11:130650622-130650563
A_19_P00322569	2.22193	1.15181	2.22193	up			FALSE	Homo sapiens precursor microRNA mir-34a, complete sequence. [EF609116]			9242124	chr1	9242066	-	hs|1p36.22	EF609116	chr1:9242124-9242066		Hs.730325
A_32_P186731	2.39707	1.26127	2.39707	up	ISM1	isthmin 1, angiogenesis inhibitor	FALSE	Homo sapiens isthmin 1, angiogenesis inhibitor (ISM1), mRNA [NM_080826]	140862	GO:0005576	13280897	chr20	13280838	+	hs|20p12.1	NM_080826	chr20:13280838-13280897	NM_080826	Hs.559353
A_33_P3333683	2.16364	1.11346	2.16364	up			FALSE	AF039690 antigen NY-CO-8 {Homo sapiens} (exp=-1; wgp=0; cg=0), partial (10%) [THC2493232]			243646191	chr1	243646132	-	hs|1q43		chr1:243646191-243646132
A_33_P3399875	2.77056	1.47018	2.77056	up	C20orf144	chromosome 20 open reading frame 144	FALSE	Homo sapiens chromosome 20 open reading frame 144 (C20orf144), mRNA [NM_080825]	128864		32250212	chr20	32250153	+	hs|20q11.22	NM_080825	chr20:32250153-32250212	NM_080825	Hs.324104
A_33_P3454968	2.95088	1.56115	2.95088	up	LOC645553	uncharacterized LOC645553	FALSE	PREDICTED: Homo sapiens uncharacterized LOC645553 (AC006262.5), misc_RNA [XR_244001]	645553		46692429	chr19	46692370	-	hs|19q13.32	XR_244001	chr19:46692429-46692370	XR_244001	Hs.613068
A_21_P0011573	3.43332	1.77961	3.43332	up			FALSE				19364076	chr17	19364017	-	hs|17p11.2	TCONS_l2_00011128	chr17:19364076-19364017
A_21_P0003244	2.2192	1.15004	2.2192	up	lnc-EPHA6-1	lnc-EPHA6-1:3	FALSE	LNCipedia lincRNA (lnc-EPHA6-1), lincRNA [lnc-EPHA6-1:3]			96336779	chr3	96336720	+	hs|3q11.2		chr3:96336720-96336779
A_33_P3377763	2.97264	1.57174	2.97264	up	FLJ36000	uncharacterized FLJ36000	FALSE	Homo sapiens uncharacterized FLJ36000 (FLJ36000), long non-coding RNA [NR_027084]	284124		21909546	chr17	21909487	+	hs|17p11.2	NR_027084	chr17:21909487-21909546	NR_027084	Hs.310247
A_33_P3247210	2.084	1.05935	2.084	up			FALSE				17935268	chr2	17935209	-	hs|2p24.2		chr2:017935268-017935209
A_33_P3315836	2.00085	1.00061	2.00085	up			FALSE				19812002	chr18	19811943	+	hs|18q11.2		chr18:019811943-019812002
A_33_P3267607	2.06748	1.04788	2.06748	up	LOC729870	uncharacterized LOC729870	FALSE	PREDICTED: Homo sapiens uncharacterized LOC729870 (LOC729870), misc_RNA [XR_244739]	729870		153855732	chr4	153855673	-	hs|4q31.3	XR_244739	chr4:153855732-153855673	XR_244739	Hs.310357
A_24_P233078	2.19062	1.13134	2.19062	up	PYY2	peptide YY, 2 (pseudogene)	FALSE	Homo sapiens peptide YY, 2 (pseudogene) (PYY2), non-coding RNA [NR_003064]	23615	GO:0005576	26554967	chr17	26554908	+	hs|17q11.2		chr17:26554908-26554967	NR_003064	Hs.157195
A_24_P117942	2.672	1.41792	2.672	up	TOMM20L	translocase of outer mitochondrial membrane 20 homolog (yeast)-like	FALSE	Homo sapiens translocase of outer mitochondrial membrane 20 homolog (yeast)-like (TOMM20L), mRNA [NM_207377]	387990	GO:0005742|GO:0016021|GO:0006605	58874175	chr14	58874116	+	hs|14q23.1	NM_207377	chr14:58874116-58874175	NM_207377	Hs.592307
A_19_P00315810	2.01322	1.00951	2.01322	up			FALSE				237642163	chr2	237642104	+	hs|2q37.3		chr2:237642104-237642163
A_33_P3684897	2.43667	1.28491	2.43667	up	FLJ30064	uncharacterized LOC644975	FALSE	DA730659 NT2RM4 Homo sapiens cDNA clone NT2RM4000525 5', mRNA sequence [DA730659]	644975		97937254	chr7	97937195	-	hs|7q21.3	DA730659	chr7:97937254-97937195		Hs.632300
A_33_P3269924	2.07807	1.05524	2.07807	up	HIP1R	huntingtin interacting protein 1 related	FALSE	Homo sapiens huntingtin interacting protein 1 related (HIP1R), transcript variant 3, mRNA [NM_001303099]	9026	GO:0005515|GO:0048471|GO:0030036|GO:0030136|GO:0003779|GO:0006898|GO:0043231|GO:0030665|GO:0005737|GO:0005905|GO:0005856|GO:0030674|GO:0035091	123319464	chr12	123319405	+	hs|12q24.31	NM_001303099	chr12:123319405-123319464	NM_001303099	Hs.524815
A_23_P112026	3.17408	1.66634	3.17408	up	IDO1	indoleamine 2,3-dioxygenase 1	FALSE	Homo sapiens indoleamine 2,3-dioxygenase 1 (IDO1), mRNA [NM_002164]	3620	GO:0006569|GO:0070233|GO:0032693|GO:0046006|GO:0070234|GO:0002534|GO:0032735|GO:0044281|GO:0046872|GO:0030485|GO:0005829|GO:0042130|GO:0034641|GO:0002678|GO:0032496|GO:0007565|GO:0004833|GO:0009055|GO:0032421|GO:0033555|GO:0002666|GO:0019441|GO:0033754|GO:0002830|GO:0034276|GO:0020037|GO:0055114	39785588	chr8	39785529	+	hs|8p11.21	NM_002164	chr8:39785529-39785588	NM_002164	Hs.840
A_23_P69497	2.94376	1.55766	2.94376	up	CLEC3B	C-type lectin domain family 3, member B	FALSE	Homo sapiens C-type lectin domain family 3, member B (CLEC3B), mRNA [NM_003278]	7123	GO:0001652|GO:0071310|GO:0005509|GO:0071560|GO:0005576|GO:0030282|GO:0005615|GO:0031012|GO:0001501|GO:0005737|GO:0001503|GO:0010756|GO:0030246|GO:0008201|GO:0070062|GO:0036143	45077561	chr3	45077502	+	hs|3p21.31	NM_003278	chr3:45077502-45077561	NM_003278	Hs.476092
A_21_P0004551	4.17541	2.06192	4.17541	up	LINC01019	long intergenic non-protein coding RNA 1019	FALSE	Homo sapiens long intergenic non-protein coding RNA 1019 (LINC01019), long non-coding RNA [NR_033898]	285577		3419213	chr5	3419154	-	hs|5p15.33	NR_033898	chr5:3419213-3419154	NR_033898	Hs.582442
A_23_P49254	2.32081	1.21463	2.32081	up	HBQ1	hemoglobin, theta 1	FALSE	Homo sapiens hemoglobin, theta 1 (HBQ1), mRNA [NM_005331]	3049	GO:0019825|GO:0005833|GO:0005506|GO:0005344|GO:0020037|GO:0015671	230717	chr16	230574	+	hs|16p13.3	NM_005331	chr16:230574-230717	NM_005331	Hs.247921
A_32_P144342	22.972	4.5218	22.972	up	PARP4	poly (ADP-ribose) polymerase family, member 4	FALSE	Homo sapiens poly (ADP-ribose) polymerase family, member 4 (PARP4), mRNA [NM_006437]	143	GO:0005515|GO:0008219|GO:0042493|GO:0005634|GO:0003677|GO:0006974|GO:0003950|GO:0006471|GO:0005737|GO:0006281|GO:0006954|GO:0016020|GO:0030529|GO:0006810|GO:0005876|GO:0019899|GO:0006464|GO:0070062	24995222	chr13	24995163	-	hs|13q12.12	NM_006437	chr13:24995222-24995163	NM_006437	Hs.744855
A_33_P3418833	2.29696	1.19972	2.29696	up	FLRT3	fibronectin leucine rich transmembrane protein 3	FALSE	Homo sapiens fibronectin leucine rich transmembrane protein 3 (FLRT3), transcript variant 2, mRNA [NM_198391]	23767	GO:0035556|GO:0008150|GO:0045499|GO:0007411|GO:0005887|GO:0050919|GO:0005578|GO:0005057|GO:0030674|GO:0007155|GO:0005615	14304719	chr20	14304660	-	hs|20p12.1	NM_198391	chr20:14304719-14304660	NM_198391	Hs.41296
A_23_P160438	2.10499	1.07381	2.10499	up	MYOG	myogenin (myogenic factor 4)	FALSE	Homo sapiens myogenin (myogenic factor 4) (MYOG), mRNA [NM_002479]	4656	GO:0003700|GO:0008285|GO:0003705|GO:0010831|GO:0005634|GO:0035914|GO:0071158|GO:0042693|GO:0042692|GO:0048743|GO:0032993|GO:0014878|GO:0071392|GO:0045944|GO:0042789|GO:0071285|GO:0014873|GO:0005667|GO:0000977|GO:0046982|GO:0048741|GO:0014891|GO:0070888|GO:0001047|GO:0001228|GO:0000978|GO:0014894|GO:0014737|GO:0031490|GO:0043565|GO:0007049|GO:0001077|GO:0051149|GO:0071363|GO:0001503|GO:0007519|GO:…	203052930	chr1	203052871	-	hs|1q32.1	NM_002479	chr1:203052930-203052871	NM_002479	Hs.2830
A_21_P0012445	2.04054	1.02895	2.04054	up	XLOC_l2_010239		FALSE	BROAD Institute lincRNA (XLOC_l2_010239), lincRNA [TCONS_l2_00019353]			72146628	chr3	72146569	-	hs|3p13		chr3:72146628-72146569
A_23_P404481	2.02943	1.02108	2.02943	up	S1PR1	sphingosine-1-phosphate receptor 1	FALSE	Homo sapiens sphingosine-1-phosphate receptor 1 (S1PR1), mRNA [NM_001400]	1901	GO:0005886|GO:0003376|GO:0030032|GO:0031226|GO:0045124|GO:0019226|GO:0038036|GO:0007193|GO:0030155|GO:0050927|GO:0006935|GO:0051482|GO:0045944|GO:0030182|GO:0003245|GO:0045446|GO:0007155|GO:0030500|GO:0001664|GO:0030335|GO:0046625|GO:0031532|GO:0004930|GO:0061384|GO:0001525|GO:0048661|GO:0072678|GO:0051497|GO:0007186|GO:0016477|GO:0032320|GO:0007420|GO:0045121|GO:0016021|GO:0001955|GO:0009897|GO:…	101706380	chr1	101706321	+	hs|1p21.2	NM_001400	chr1:101706321-101706380	NM_001400	Hs.154210
A_33_P3383891	2.96245	1.56679	2.96245	up			FALSE	Homo sapiens cDNA FLJ45994 fis, clone SKMUS2009557. [AK127888]			24916402	chr18	24916343	-	hs|18q11.2		chr18:24916402-24916343
A_24_P281801	2.25479	1.17299	2.25479	up	ZNF732	zinc finger protein 732	FALSE	Homo sapiens zinc finger protein 732 (ZNF732), mRNA [NM_001137608]	654254	GO:0006355|GO:0005634|GO:0003677|GO:0046872|GO:0006351	265611	chr4	265552	-	hs|4p16.3	NM_001137608	chr4:265611-265552	NM_001137608	Hs.698668
A_23_P159974	2.12042	1.08435	2.12042	up	KLHL13	kelch-like family member 13	FALSE	Homo sapiens kelch-like family member 13 (KLHL13), transcript variant 1, mRNA [NM_033495]	90293	GO:0000910|GO:0007067|GO:0004842|GO:0016567|GO:0031463	117032474	chrX	117032415	-	hs|Xq24	NM_033495	chrX:117032474-117032415	NM_033495	Hs.348262
A_21_P0001245	2.09706	1.06837	2.09706	up	LOC101927851	uncharacterized LOC101927851	FALSE		101927851		235095475	chr1	235095416	-	hs|1q42.3		chr1:235095475-235095416
A_33_P3257479	2.11262	1.07904	2.11262	up			FALSE
A_33_P3299739	2.13082	1.09141	2.13082	up	CLDN19	claudin 19	FALSE	Homo sapiens claudin 19 (CLDN19), transcript variant 2, mRNA [NM_001123395]	149461	GO:0005634|GO:0019227|GO:0042802|GO:0043297|GO:0016323|GO:0043296|GO:0005737|GO:0016338|GO:0005198|GO:0005923|GO:0016021|GO:0007601|GO:0050896	43200754	chr1	43200695	-	hs|1p34.2	NM_001123395	chr1:43200754-43200695	NM_001123395	Hs.496270
A_33_P3303729	2.5427	1.34636	2.5427	up	XLOC_l2_013415		FALSE	BROAD Institute lincRNA (XLOC_l2_013415), lincRNA [TCONS_l2_00025888]			56559896	chr7	56559837	+	hs|7p11.2		chr7:56559837-56559896
A_23_P56328	2.37453	1.24764	2.37453	up	PLVAP	plasmalemma vesicle associated protein	FALSE	plasmalemma vesicle associated protein [Source:HGNC Symbol;Acc:HGNC:13635] [ENST00000252590]	83483	GO:0005515|GO:0048471|GO:0009986|GO:0000165|GO:0005901|GO:0016021|GO:0002693|GO:0070528|GO:0042803|GO:0033209|GO:0070062	17462701	chr19	17462642	-	hs|19p13.11	AK096030	chr19:17462701-17462642		Hs.107125
A_23_P121064	2.0388	1.02772	2.0388	up	PTX3	pentraxin 3, long	FALSE	Homo sapiens pentraxin 3, long (PTX3), mRNA [NM_002852]	5806	GO:0050766|GO:0006954|GO:0046597|GO:0045087|GO:0001849|GO:0046790|GO:0005576|GO:0001872|GO:0005615|GO:0001878|GO:0008228|GO:0045429	157161028	chr3	157160969	+	hs|3q25.32	NM_002852	chr3:157160969-157161028	NM_002852	Hs.591286
A_33_P3216150	2.17475	1.12085	2.17475	up	PRB4	proline-rich protein BstNI subfamily 4	FALSE	Homo sapiens proline-rich protein BstNI subfamily 4 (PRB4), transcript variant 1, mRNA [NM_002723]	5545	GO:0008150|GO:0003674|GO:0005576	11461387	chr12	11461328	-	hs|12p13.2	NM_002723	chr12:11461387-11461328	NM_002723	Hs.528651
A_33_P3363271	2.87482	1.52347	2.87482	up	CACNB2	calcium channel, voltage-dependent, beta 2 subunit	FALSE	Homo sapiens calcium channel, voltage-dependent, beta 2 subunit (CACNB2), transcript variant 1, mRNA [NM_000724]	783	GO:0005515|GO:0005262|GO:0005245|GO:0051928|GO:0007268|GO:0008331|GO:0005891|GO:0042383|GO:0070509|GO:0005887|GO:0007411|GO:0007528|GO:0070588|GO:0006810|GO:0007601	18829968	chr10	18829909	+	hs|10p12.31	NM_000724	chr10:18829909-18829968	NM_000724	Hs.59093
A_21_P0001616	2.14167	1.09874	2.14167	up	lnc-C1orf133-1	lnc-C1orf133-1:1	FALSE	LNCipedia lincRNA (lnc-C1orf133-1), lincRNA [lnc-C1orf133-1:1]			210463846	chr1	210463787	-	hs|1q32.2		chr1:210463846-210463787
A_33_P3329557	2.13967	1.09739	2.13967	up			FALSE	AGENCOURT_6491926 NIH_MGC_124 Homo sapiens cDNA clone IMAGE:5728095 5', mRNA sequence [BM544378]			95364976	chr13	95364917	-	hs|13q32.1	BM544378	chr13:095364976-095364917		Hs.741900
A_23_P109322	2.04803	1.03424	2.04803	up	PCP4	Purkinje cell protein 4	FALSE	Homo sapiens Purkinje cell protein 4 (PCP4), mRNA [NM_006198]	5121	GO:0005516|GO:0005634|GO:0007417|GO:0005829	41301106	chr21	41301047	+	hs|21q22.2	NM_006198	chr21:41301047-41301106	NM_006198	Hs.80296
A_21_P0008768	2.5567	1.35428	2.5567	up	LOC101929641	uncharacterized LOC101929641	FALSE	PREDICTED: Homo sapiens uncharacterized LOC101929641 (LOC101929641), ncRNA [XR_243223]	101929641		85857975	chr15	85857916	-	hs|15q25.3	XR_243223	chr15:85857975-85857916	XR_243223	Hs.679695
A_21_P0008128	2.68494	1.42489	2.68494	up	lnc-CRYL1-1	lnc-CRYL1-1:2	FALSE	LNCipedia lincRNA (lnc-CRYL1-1), lincRNA [lnc-CRYL1-1:2]			21140434	chr13	21140375	-	hs|13q12.11		chr13:21140434-21140375
A_23_P146233	2.15005	1.10437	2.15005	up	LPL	lipoprotein lipase	FALSE	Homo sapiens lipoprotein lipase (LPL), mRNA [NM_000237]	4023	GO:0005515|GO:0004806|GO:0007603|GO:0005886|GO:0009409|GO:0042627|GO:0070328|GO:0044281|GO:0031225|GO:0005615|GO:0034361|GO:0019432|GO:0006633|GO:0019433|GO:0008201|GO:0070062|GO:0009986|GO:0010744|GO:0042493|GO:0005102|GO:0005576|GO:0004620|GO:0010886|GO:0004465|GO:0001523|GO:0031012|GO:0034372|GO:0034371|GO:0010890|GO:0042157|GO:0006641|GO:0034185|GO:0006644|GO:0017129	19824246	chr8	19824187	+	hs|8p21.3	NM_000237	chr8:19824187-19824246	NM_000237	Hs.180878
A_21_P0005307	2.16503	1.11438	2.16503	up			FALSE	603206582F1 NIH_MGC_97 Homo sapiens cDNA clone IMAGE:5272268 5', mRNA sequence [BI461253]			52233018	chr7	52232959	-	hs|7p12.1		chr7:52233018-52232959		Hs.583321
A_33_P3332414	2.62913	1.39459	2.62913	up	ABCB1	ATP-binding cassette, sub-family B (MDR/TAP), member 1	FALSE	Homo sapiens ATP-binding cassette, sub-family B (MDR/TAP), member 1 (ABCB1), mRNA [NM_000927]	5243	GO:0005515|GO:0005215|GO:0005886|GO:0009986|GO:0042493|GO:0072089|GO:0042626|GO:0042908|GO:0044281|GO:0055085|GO:0005524|GO:0008559|GO:0016020|GO:0000086|GO:0006855|GO:0006810|GO:0016021|GO:0070062	87229494	chr7	87229435	-	hs|7q21.12	NM_000927	chr7:87229494-87229435	NM_000927	Hs.489033
A_21_P0010421	2.02629	1.01884	2.02629	up	lnc-PPARA-2	lnc-PPARA-2:1	FALSE	LNCipedia lincRNA (lnc-PPARA-2), lincRNA [lnc-PPARA-2:1]			46539396	chr22	46533674	+	hs|22q13.31		chr22:46533674-46539396
A_21_P0009075	2.12053	1.08443	2.12053	up	lnc-ZDHHC7-1	lnc-ZDHHC7-1:2	FALSE	LNCipedia lincRNA (lnc-ZDHHC7-1), lincRNA [lnc-ZDHHC7-1:2]			84983186	chr16	84983127	-	hs|16q24.1		chr16:84983186-84983127
A_23_P131588	2.57109	1.36238	2.57109	up	BMP10	bone morphogenetic protein 10	FALSE	Homo sapiens bone morphogenetic protein 10 (BMP10), mRNA [NM_014482]	27302	GO:0060045|GO:0005515|GO:0030018|GO:0030308|GO:0055010|GO:0060395|GO:0005615|GO:0007512|GO:0010614|GO:0005737|GO:0030198|GO:0043408|GO:0007155|GO:0010613|GO:0055009|GO:0033612|GO:0030336|GO:0009986|GO:0045214|GO:0010862|GO:0031433|GO:0005576|GO:0042981|GO:0030509|GO:0032924|GO:0005160|GO:0005125|GO:2000138|GO:0060038|GO:0060347|GO:0010596|GO:0005179|GO:0060298|GO:0055117|GO:0055015|GO:0060389|GO:…	69093132	chr2	69093073	-	hs|2p13.3	NM_014482	chr2:69093132-69093073	NM_014482	Hs.158317
A_24_P330633	2.29375	1.19771	2.29375	up	TAT	tyrosine aminotransferase	FALSE	Homo sapiens tyrosine aminotransferase (TAT), mRNA [NM_000353]	6898	GO:0006559|GO:0006536|GO:0009058|GO:0004838|GO:0051384|GO:0044281|GO:0005575|GO:0005829|GO:0005739|GO:0034641|GO:0006103|GO:0030170|GO:0006572|GO:0046689|GO:0006979|GO:0016597|GO:0080130	71600789	chr16	71600754	-	hs|16q22.2	NM_000353	chr16:71600789-71600754	NM_000353	Hs.161640
A_33_P3216570	2.16974	1.11752	2.16974	up	MUC5AC	mucin 5AC, oligomeric mucus/gel-forming	FALSE	PREDICTED: Homo sapiens mucin 5AC, oligomeric mucus/gel-forming (MUC5AC), partial mRNA [XM_006709945]	4586	GO:0006493|GO:0005796|GO:0016266|GO:0043205|GO:0043206|GO:0044267|GO:0070062|GO:0043687|GO:0005201						XM_006709945		XM_006709945	Hs.721515
A_33_P3398195	2.11562	1.08108	2.11562	up	KLK9	kallikrein-related peptidase 9	FALSE	Homo sapiens kallikrein-related peptidase 9 (KLK9), mRNA [NM_012315]	284366	GO:0004252|GO:0006508|GO:0005576	51506104	chr19	51506045	-	hs|19q13.41	NM_012315	chr19:51506104-51506045	NM_012315	Hs.448942
A_23_P363275	2.00968	1.00697	2.00968	up	WDR66	WD repeat domain 66	FALSE	Homo sapiens WD repeat domain 66 (WDR66), transcript variant 1, mRNA [NM_144668]	144406		122441714	chr12	122441655	+	hs|12q24.31	NM_144668	chr12:122441655-122441714	NM_144668	Hs.709837
A_32_P221	3.85111	1.94527	3.85111	up	C16orf78	chromosome 16 open reading frame 78	FALSE	Homo sapiens chromosome 16 open reading frame 78 (C16orf78), mRNA [NM_144602]	123970	GO:0005634	49433174	chr16	49433115	+	hs|16q12.1	NM_144602	chr16:49433115-49433174	NM_144602	Hs.125875
A_33_P3309471	2.39344	1.25909	2.39344	up	PTPRQ	protein tyrosine phosphatase, receptor type, Q	FALSE	Homo sapiens protein tyrosine phosphatase, receptor type, Q (PTPRQ), mRNA [NM_001145026]	374462	GO:0045598|GO:0016021|GO:0035335|GO:0004725	81073798	chr12	81073739	+	hs|12q21.31	NM_001145026	chr12:81073739-81073798	NM_001145026	Hs.539284
A_21_P0008230	2.47316	1.30636	2.47316	up	lnc-SGCG-5	lnc-SGCG-5:3	FALSE	LNCipedia lincRNA (lnc-SGCG-5), lincRNA [lnc-SGCG-5:3]			23507309	chr13	23506276	+	hs|13q12.12		chr13:23506276-23507309
A_21_P0006929	2.27309	1.18466	2.27309	up	lnc-GPR26-4	lnc-GPR26-4:5	FALSE	LNCipedia lincRNA (lnc-GPR26-4), lincRNA [lnc-GPR26-4:5]			125208872	chr10	125188631	+	hs|10q26.13		chr10:125188631-125208872
A_24_P368943	4.46762	2.15951	4.46762	up	EVX1	even-skipped homeobox 1	FALSE	Homo sapiens even-skipped homeobox 1 (EVX1), mRNA [NM_001989]	2128	GO:0043565|GO:0003700|GO:0045944|GO:0005634|GO:0009792|GO:0021913	27286018	chr7	27285959	+	hs|7p15.2	NM_001989	chr7:27285959-27286018	NM_001989	Hs.369879
A_23_P208900	2.59887	1.37788	2.59887	up	SEMA6B	sema domain, transmembrane domain (TM), and cytoplasmic domain, (semaphorin) 6B	FALSE	Homo sapiens sema domain, transmembrane domain (TM), and cytoplasmic domain, (semaphorin) 6B (SEMA6B), mRNA [NM_032108]	10501	GO:0005886|GO:0030215|GO:0004872|GO:0016021|GO:0030154|GO:0007399	4542955	chr19	4542896	-	hs|19p13.3	NM_032108	chr19:4542955-4542896	NM_032108	Hs.465642
A_21_P0006563	2.95637	1.56383	2.95637	up	ZC3H12B	zinc finger CCCH-type containing 12B	FALSE	zinc finger CCCH-type containing 12B [Source:HGNC Symbol;Acc:HGNC:17407] [ENST00000617377]	340554	GO:0004519|GO:0090305|GO:0046872	64588865	chrX	64588806	+	hs|Xq11.2		chrX:64588806-64588865		Hs.533278
A_21_P0002621	7.84646	2.97204	7.84646	up	LINC01117	long intergenic non-protein coding RNA 1117	FALSE	PREDICTED: Homo sapiens uncharacterized LOC102724224 (LOC102724224), ncRNA [XR_427195]	102724224		177520704	chr2	177520645	+	hs|2q31.1		chr2:177520645-177520704	XR_427195
A_21_P0009239	5.51054	2.46219	5.51054	up	lnc-TMEM132E-2	lnc-TMEM132E-2:1	FALSE	LNCipedia lincRNA (lnc-TMEM132E-2), lincRNA [lnc-TMEM132E-2:1]			32803129	chr17	32803070	+	hs|17q12		chr17:32803070-32803129
A_23_P132738	2.21267	1.14579	2.21267	up	CRYGS	crystallin, gamma S	FALSE	Homo sapiens crystallin, gamma S (CRYGS), mRNA [NM_017541]	1427	GO:0005212|GO:0002088|GO:0002009	186256728	chr3	186256669	-	hs|3q27.3	NM_017541	chr3:186256728-186256669	NM_017541	Hs.376209
A_33_P3330826	2.06329	1.04495	2.06329	up	LOC100132077	uncharacterized LOC100132077	FALSE	Homo sapiens uncharacterized LOC100132077 (LOC100132077), long non-coding RNA [NR_033937]	100132077		97122178	chr9	97122119	+	hs|9q22.32		chr9:97122119-97122178	NR_033937	Hs.679111
A_33_P3316671	2.04913	1.03501	2.04913	up			FALSE				135614696	chr7	135614637	+	hs|7q33		chr7:135614637-135614696
A_21_P0005674	2.69955	1.43272	2.69955	up	lnc-SLC25A37-1	lnc-SLC25A37-1:1	FALSE	AGENCOURT_7938426 NIH_MGC_71 Homo sapiens cDNA clone IMAGE:6173131 5', mRNA sequence [BU195360]			23336893	chr8	23336834	+	hs|8p21.2		chr8:23336834-23336893		Hs.386254
A_33_P3396434	2.01862	1.01337	2.01862	up			FALSE				36788514	chr1	36788455	-	hs|1p34.3		chr1:036788514-036788455
A_33_P3237574	4.05646	2.02022	4.05646	up	HLA-A	major histocompatibility complex, class I, A	FALSE	Homo sapiens major histocompatibility complex, class I, A (HLA-A), transcript variant 2 (A*01:01:01:01 allele), mRNA [NM_001242758]	3105	GO:0005515|GO:0002474|GO:0005886|GO:0005783|GO:0019221|GO:0042608|GO:0006955|GO:0060337|GO:0042605|GO:0030670|GO:0071556|GO:0016032|GO:0070062|GO:0060333|GO:0042270|GO:0032729|GO:0012507|GO:0030881|GO:0002480|GO:0005794|GO:0002486|GO:0009986|GO:2000568|GO:0042612|GO:0005797|GO:0042590|GO:0005102|GO:0070971|GO:0050690|GO:0000139|GO:0016020|GO:0005887|GO:0001916|GO:0031901|GO:0050776|GO:0002479|GO:…	29910402	chr6	29910343	+	hs|6p22.1	NM_001242758	chr6:29910343-29910402	NM_001242758	Hs.181244
A_21_P0000964	3.00839	1.58899	3.00839	up	LINC01226	long intergenic non-protein coding RNA 1226	FALSE	Homo sapiens long intergenic non-protein coding RNA 1226 (LINC01226), long non-coding RNA [NR_027085]	284551		31988768	chr1	31988709	+	hs|1p35.2	NR_027085	chr1:31988709-31988768	NR_027085	Hs.658659
A_23_P326760	2.35318	1.23461	2.35318	up	MYRIP	myosin VIIA and Rab interacting protein	FALSE	Homo sapiens myosin VIIA and Rab interacting protein (MYRIP), transcript variant 1, mRNA [NM_015460]	25924	GO:0005515|GO:0030133|GO:0042470|GO:0048471|GO:0017137|GO:0031045|GO:0045202|GO:0003779|GO:0015629|GO:0006886|GO:0000145|GO:0008270|GO:0032024|GO:0051018|GO:0001750	40301784	chr3	40301725	+	hs|3p22.1	NM_015460	chr3:40301725-40301784	NM_015460	Hs.594535
A_19_P00808834	2.29492	1.19844	2.29492	up	LINC01478	long intergenic non-protein coding RNA 1478	FALSE	Homo sapiens long intergenic non-protein coding RNA 1478 (LINC01478), long non-coding RNA [NR_110792]	101927921		41903557	chr18	41903498	-	hs|18q12.3	NR_110792	chr18:41903557-41903498	NR_110792	Hs.464986
A_33_P3295148	2.30344	1.20379	2.30344	up	GLUD1P3	glutamate dehydrogenase 1 pseudogene 3	FALSE	Homo sapiens glutamate dehydrogenase 1 pseudogene 3 (GLUD1P3), non-coding RNA [NR_048575]	2749		75491376	chr10	75491317	+	hs|10q22.2	NR_048575	chr10:75491317-75491376	NR_048575	Hs.676111
A_21_P0010545	2.31609	1.21169	2.31609	up	LAMTOR5-AS1	LAMTOR5 antisense RNA 1	FALSE	Homo sapiens LAMTOR5 antisense RNA 1 (LAMTOR5-AS1), long non-coding RNA [NR_102697]	101410535		110958869	chr1	110958810	+	hs|1p13.3		chr1:110958810-110958869	NR_102697
A_24_P226755	2.13861	1.09667	2.13861	up	TOX	thymocyte selection-associated high mobility group box	FALSE	Homo sapiens thymocyte selection-associated high mobility group box (TOX), mRNA [NM_014729]	9760	GO:0006355|GO:0003682|GO:0006338|GO:0005634|GO:0003677	59718581	chr8	59718522	-	hs|8q12.1	NM_014729	chr8:59718581-59718522	NM_014729	Hs.491805
A_21_P0001618	2.17832	1.12321	2.17832	up	lnc-TMEM206-4	lnc-TMEM206-4:1	FALSE	LNCipedia lincRNA (lnc-TMEM206-4), lincRNA [lnc-TMEM206-4:1]			212687879	chr1	212679787	-	hs|1q32.3		chr1:212687879-212679787
A_21_P0008039	2.05229	1.03724	2.05229	up	lnc-WASF3-1	lnc-WASF3-1:1	FALSE	LNCipedia lincRNA (lnc-WASF3-1), lincRNA [lnc-WASF3-1:1]			27092904	chr13	27092845	+	hs|13q12.13		chr13:27092845-27092904
A_23_P68240	2.17289	1.11962	2.17289	up	GPAT2	glycerol-3-phosphate acyltransferase 2, mitochondrial	FALSE	Homo sapiens glycerol-3-phosphate acyltransferase 2, mitochondrial (GPAT2), mRNA [NM_207328]	150763	GO:0005739|GO:0019432|GO:0016024|GO:0005741|GO:0004366|GO:0044281|GO:0016021|GO:0006644|GO:0006072|GO:0006654|GO:0046474	96687802	chr2	96687743	-	hs|2q11.1	NM_207328	chr2:96687802-96687743	NM_207328	Hs.348629
A_21_P0013799	2.09857	1.06941	2.09857	up	XLOC_l2_015641		FALSE	BROAD Institute lincRNA (XLOC_l2_015641), lincRNA [TCONS_l2_00030391]			149129249	chrX	149129190	+	hs|Xq28		chrX:149129190-149129249		Hs.496916
A_19_P00319236	2.06725	1.04772	2.06725	up	LINC00354	long intergenic non-protein coding RNA 354	FALSE	Homo sapiens long intergenic non-protein coding RNA 354 (LINC00354), transcript variant 1, long non-coding RNA [NR_120401]	101928616		112555172	chr13	112555113	+	hs|13q34	NR_120401	chr13:112555113-112555172	NR_120401	Hs.528450
A_33_P3347193	3.22465	1.68914	3.22465	up	VSTM2A	V-set and transmembrane domain containing 2A	FALSE	Homo sapiens V-set and transmembrane domain containing 2A (VSTM2A), transcript variant 2, mRNA [NM_001301009]	222008	GO:0005576	54617716	chr7	54617657	+	hs|7p11.2	NM_001301009	chr7:54617657-54617716	NM_001301009	Hs.731937
A_19_P00805006	2.03152	1.02256	2.03152	up	MALAT1	metastasis associated lung adenocarcinoma transcript 1 (non-protein coding)	FALSE	Homo sapiens metastasis associated lung adenocarcinoma transcript 1 (non-protein coding) (MALAT1), long non-coding RNA [NR_002819]	378938		65273930	chr11	65273871	+	hs|11q13.1	NR_002819	chr11:65273871-65273930	NR_002819	Hs.621695
A_33_P3241269	3.59166	1.84465	3.59166	up	CES1	carboxylesterase 1	FALSE	Homo sapiens carboxylesterase 1 (CES1), transcript variant 1, mRNA [NM_001025195]	1066	GO:0052689|GO:0030855|GO:0008152|GO:0009636|GO:0005788|GO:0047374|GO:0005615	55836823	chr16	55836764	-	hs|16q12.2	NM_001025195	chr16:55836823-55836764	NM_001025195	Hs.558865
A_33_P3546363	3.33435	1.7374	3.33435	up	TUSC8	tumor suppressor candidate 8 (non-protein coding)	FALSE	AGENCOURT_8883169 Lupski_sciatic_nerve Homo sapiens cDNA clone IMAGE:6199956 5', mRNA sequence [BQ950045]	400128		44978922	chr13	44978863	-	hs|13q14.11	BQ950045	chr13:44978922-44978863		Hs.438480
A_33_P3250730	2.35525	1.23588	2.35525	up	ASIC4	acid sensing (proton gated) ion channel family member 4	FALSE	Homo sapiens acid sensing (proton gated) ion channel family member 4 (ASIC4), mRNA [NM_182847]	55515	GO:0034220|GO:0005887|GO:0005272|GO:0006810|GO:0035725|GO:0015081|GO:0005216	220403486	chr2	220403427	+	hs|2q35	NM_182847	chr2:220403427-220403486	NM_182847	Hs.87469
A_21_P0009172	2.83726	1.5045	2.83726	up			FALSE				48291815	chr17	48291756	+	hs|17q21.33		chr17:48291756-48291815
A_33_P3704280	4.07241	2.02588	4.07241	up	SAP30L-AS1	SAP30L antisense RNA 1 (head to head)	FALSE	Homo sapiens cDNA FLJ38109 fis, clone D3OST2001788. [AK095428]	386627		153813457	chr5	153813398	-	hs|5q33.2	AK095428	chr5:153813457-153813398		Hs.652021
A_33_P3394599	19.8085	4.30804	19.8085	up	HMG20B	high mobility group 20B	FALSE	Homo sapiens high mobility group 20B (HMG20B), mRNA [NM_006339]	10362	GO:0005515|GO:0006355|GO:0046982|GO:0005694|GO:0006325|GO:0035914|GO:0003677|GO:0006351|GO:0007049|GO:0045666|GO:0007596|GO:0003682|GO:0005654|GO:0006338|GO:0033234	3578110	chr19	3578051	+	hs|19p13.3	NM_006339	chr19:3578051-3578110	NM_006339	Hs.406534
A_33_P3226565	2.08256	1.05836	2.08256	up			FALSE				93669126	chr10	93669067	+	hs|10q23.32		chr10:093669067-093669126
A_33_P3235721	2.50327	1.32381	2.50327	up	C11orf87	chromosome 11 open reading frame 87	FALSE	Homo sapiens chromosome 11 open reading frame 87 (C11orf87), mRNA [NM_207645]	399947	GO:0016021	109296305	chr11	109296246	+	hs|11q22.3	NM_207645	chr11:109296246-109296305	NM_207645	Hs.172982
A_21_P0009080	2.01953	1.01402	2.01953	up	lnc-COX4NB-1	lnc-COX4NB-1:1	FALSE	LNCipedia lincRNA (lnc-COX4NB-1), lincRNA [lnc-COX4NB-1:1]			85995498	chr16	85995141	-	hs|16q24.1		chr16:85995498-85995141
A_33_P3283515	2.22085	1.15111	2.22085	up	PDZD2	PDZ domain containing 2	FALSE	PDZ domain containing 2 [Source:HGNC Symbol;Acc:HGNC:18486] [ENST00000397559]	23037	GO:0005737|GO:0005911|GO:0005783|GO:0005634|GO:0005576|GO:0007155	32101030	chr5	32100973	+	hs|5p13.3	XM_006714456	chr5:32100973-32101030	XM_006714456	Hs.481819
A_21_P0013062	2.11532	1.08087	2.11532	up	LOC101928106	uncharacterized LOC101928106	FALSE	PREDICTED: Homo sapiens uncharacterized LOC101928106 (RP1-290I10.5), ncRNA [XR_251961]	101928106		10474793	chr6	10474734	-	hs|6p24.3	XR_251961	chr6:10474793-10474734	XR_251961	Hs.582909
A_23_P121926	2.06255	1.04443	2.06255	up	SEPP1	selenoprotein P, plasma, 1	FALSE	Homo sapiens selenoprotein P, plasma, 1 (SEPP1), transcript variant 1, mRNA [NM_005410]	6414	GO:0019953|GO:0008430|GO:0001887|GO:0007420|GO:0007626|GO:0005576|GO:0009791|GO:0040007|GO:0006979|GO:0005615|GO:0070062	42799939	chr5	42799904	-	hs|5p12	NM_005410	chr5:42799939-42799904	NM_005410	Hs.275775
A_21_P0011339	2.23072	1.15751	2.23072	up	XLOC_l2_004772		FALSE	BROAD Institute lincRNA (XLOC_l2_004772), lincRNA [TCONS_l2_00008799]			85133466	chr15	85121311	+	hs|15q25.2		chr15:85121311-85133466
A_21_P0008490	2.96312	1.56712	2.96312	up	lnc-RTL1-6	lnc-RTL1-6:1	FALSE	LNCipedia lincRNA (lnc-RTL1-6), lincRNA [lnc-RTL1-6:1]			101820284	chr14	101820225	-	hs|14q32.31		chr14:101820284-101820225
A_21_P0006889	3.99617	1.99862	3.99617	up	lnc-PTEN-1	lnc-PTEN-1:1	FALSE	LNCipedia lincRNA (lnc-PTEN-1), lincRNA [lnc-PTEN-1:1]			89740717	chr10	89740658	+	hs|10q23.31		chr10:89740658-89740717
A_23_P114983	2.85679	1.5144	2.85679	up	TRIM63	tripartite motif containing 63, E3 ubiquitin protein ligase	FALSE	Homo sapiens tripartite motif containing 63, E3 ubiquitin protein ligase (TRIM63), mRNA [NM_032588]	84676	GO:0005515|GO:0010468|GO:0030018|GO:0004842|GO:0016567|GO:0016874|GO:0005874|GO:0005634|GO:0014732|GO:0031430|GO:0031432|GO:0007165|GO:0005737|GO:0006936|GO:0014878|GO:0043161|GO:0008270|GO:0004871|GO:0070555|GO:0071549	26377901	chr1	26377842	-	hs|1p36.11	NM_032588	chr1:26377901-26377842	NM_032588	Hs.279709
A_33_P3367396	12.9752	3.69769	12.9752	up	FAM177B	family with sequence similarity 177, member B	FALSE	Homo sapiens family with sequence similarity 177, member B (FAM177B), mRNA [NM_207468]	400823		222923538	chr1	222923479	+	hs|1q41	NM_207468	chr1:222923479-222923538	NM_207468	Hs.697608
A_33_P3589819	2.41886	1.27433	2.41886	up	MIATNB	MIAT neighbor (non-protein coding)	FALSE	Homo sapiens cDNA: FLJ22849 fis, clone KAIA987. [AK026502]	102724827		27117614	chr22	27117555	+	hs|22q12.1	AK026502	chr22:27117555-27117614		Hs.642767
A_23_P64019	2.57473	1.36442	2.57473	up	MTMR2	myotubularin related protein 2	FALSE	Homo sapiens myotubularin related protein 2 (MTMR2), transcript variant 2, mRNA [NM_201278]	8898	GO:0005515|GO:0030424|GO:0005634|GO:0044281|GO:0030425|GO:0035335|GO:0042803|GO:0005829|GO:0005737|GO:0006470|GO:0043197|GO:0048666|GO:0045806|GO:0052629|GO:0004725|GO:0031642|GO:0070062|GO:0005774|GO:0051262|GO:0006661|GO:2000643|GO:2000645|GO:0008021|GO:0032288|GO:0097062|GO:0090394|GO:0004438|GO:0031901|GO:0046855|GO:0097060|GO:0046856|GO:0008138|GO:0006644|GO:0002091	95567472	chr11	95567413	-	hs|11q21	NM_201278	chr11:95567472-95567413	NM_201278	Hs.181326
A_21_P0005579	2.10354	1.07282	2.10354	up	lnc-TMEM140-1	lnc-TMEM140-1:1	FALSE	AGENCOURT_16391134 NIH_MGC_227 Homo sapiens cDNA clone IMAGE:30718868 5', mRNA sequence [CK001067]			134855905	chr7	134855846	+	hs|7q33		chr7:134855846-134855905		Hs.689673
A_21_P0000480	2.02052	1.01473	2.02052	up			FALSE				51933779	chrX	51933720	-	hs|Xp11.22		chrX:051933779-051933720
A_21_P0006584	2.03805	1.02719	2.03805	up	NKAPP1	NFKB activating protein pseudogene 1	FALSE	Homo sapiens NFKB activating protein pseudogene 1 (NKAPP1), non-coding RNA [NR_027131]	158801		119374102	chrX	119372059	-	hs|Xq24	NR_027131	chrX:119374102-119372059	NR_027131	Hs.442518
A_21_P0010295	2.00226	1.00163	2.00226	up	lnc-CSTB-1	lnc-CSTB-1:5	FALSE	LNCipedia lincRNA (lnc-CSTB-1), lincRNA [lnc-CSTB-1:5]			45225368	chr21	45225309	-	hs|21q22.3		chr21:45225368-45225309
A_23_P75790	2.26782	1.18131	2.26782	up	MYRF	myelin regulatory factor	FALSE	Homo sapiens myelin regulatory factor (MYRF), transcript variant 1, mRNA [NM_013279]	745	GO:0003700|GO:0048709|GO:0022010|GO:0005634|GO:0003677|GO:0006351|GO:0032286|GO:0014003|GO:0005789|GO:0006508|GO:0008233|GO:0016021|GO:0045893|GO:0031643	61555845	chr11	61555786	+	hs|11q12.2	NM_013279	chr11:61555786-61555845	NM_013279	Hs.473109
A_21_P0001518	2.46759	1.3031	2.46759	up	lnc-PTGER3-2	lnc-PTGER3-2:1	FALSE	LNCipedia lincRNA (lnc-PTGER3-2), lincRNA [lnc-PTGER3-2:1]			71110725	chr1	71110666	-	hs|1p31.1		chr1:71110725-71110666
A_33_P3352941	2.32512	1.2173	2.32512	up	FBXO22-AS1	FBXO22 antisense RNA 1	FALSE	Homo sapiens FBXO22 antisense RNA 1 (FBXO22-AS1), long non-coding RNA [NR_003136]	692224		76225279	chr15	76225220	-	hs|15q24.2	NR_003136	chr15:76225279-76225220	NR_003136	Hs.591115
A_23_P23611	2.49576	1.31948	2.49576	up	AMY1C	amylase, alpha 1C (salivary)	FALSE	Homo sapiens amylase, alpha 1C (salivary) (AMY1C), mRNA [NM_001008219]	278	GO:0005515|GO:0005975|GO:0007586|GO:0005615|GO:0004556|GO:0046872|GO:0070062	104207080	chr1	104207021	+	hs|1p21.1	NM_001008219	chr1:104207021-104207080	NM_001008219	Hs.655232
A_33_P3415395	2.66151	1.41225	2.66151	up	SPTLC3	serine palmitoyltransferase, long chain base subunit 3	FALSE	Homo sapiens serine palmitoyltransferase, long chain base subunit 3 (SPTLC3), mRNA [NM_018327]	55304	GO:0006665|GO:0046520|GO:0004758|GO:0030148|GO:0030170|GO:0005789|GO:0044281|GO:0016021|GO:0017059	13029769	chr20	13029710	+	hs|20p12.1	NM_018327	chr20:13029710-13029769	NM_018327	Hs.425023
A_21_P0005919	2.82684	1.49919	2.82684	up	lnc-FBXO25-4	lnc-FBXO25-4:1	FALSE	LNCipedia lincRNA (lnc-FBXO25-4), lincRNA [lnc-FBXO25-4:1]			928723	chr8	928664	+	hs|8p23.3		chr8:928664-928723
A_21_P0002632	3.19559	1.67608	3.19559	up			FALSE				238166288	chr2	238166229	+	hs|2q37.3		chr2:238166229-238166288
A_21_P0006168	7.29896	2.86769	7.29896	up	lnc-C9orf170-2	lnc-C9orf170-2:1	FALSE	LNCipedia lincRNA (lnc-C9orf170-2), lincRNA [lnc-C9orf170-2:1]			89370049	chr9	89369990	+	hs|9q21.33		chr9:89369990-89370049
A_23_P321354	2.54561	1.34801	2.54561	up	TMEM71	transmembrane protein 71	FALSE	Homo sapiens transmembrane protein 71 (TMEM71), transcript variant 1, mRNA [NM_144649]	137835	GO:0016021	133722596	chr8	133722537	-	hs|8q24.22	NM_144649	chr8:133722596-133722537	NM_144649	Hs.293842
A_21_P0014290	2.24049	1.16381	2.24049	up	LOC100507480	uncharacterized LOC100507480	FALSE	PREDICTED: Homo sapiens uncharacterized LOC100507480 (LOC100507480), ncRNA [XR_109174]	100507480		36341716	chr15	36341657	+	hs|15q14	XR_109174	chr15:36341657-36341716	XR_109174	Hs.116323
A_24_P227927	2.08694	1.06139	2.08694	up	IL21R	interleukin 21 receptor	FALSE	Homo sapiens interleukin 21 receptor (IL21R), transcript variant 2, mRNA [NM_181078]	50615	GO:0030101|GO:0016021|GO:0001532|GO:0038114	27461383	chr16	27461324	+	hs|16p12.1	NM_181078	chr16:27461324-27461383	NM_181078	Hs.210546
A_33_P3832872	4.66297	2.22125	4.66297	up	LOC389247	uncharacterized LOC389247	FALSE	Homo sapiens uncharacterized LOC389247 (LOC389247), long non-coding RNA [NR_033995]	389247		184415950	chr4	184415891	-	hs|4q35.1	NR_033995	chr4:184415950-184415891	NR_033995	Hs.385787
A_23_P202071	4.11141	2.03963	4.11141	up	CELF2	CUGBP, Elav-like family member 2	FALSE	Homo sapiens CUGBP, Elav-like family member 2 (CELF2), transcript variant 3, mRNA [NM_001025077]	10659	GO:0006397|GO:0006396|GO:0005737|GO:0000166|GO:0003723|GO:0008016|GO:0005634	11376284	chr10	11376225	+	hs|10p14	NM_001025077	chr10:11376225-11376284	NM_001025077	Hs.309288
A_21_P0009490	3.33341	1.737	3.33341	up			FALSE	601818990F1 NIH_MGC_58 Homo sapiens cDNA clone IMAGE:4044623 5', mRNA sequence [BF131455]			57796757	chr18	57792421	+	hs|18q21.32		chr18:57792421-57796757		Hs.579558
A_23_P152234	40.6695	5.34587	40.6695	up	CMTM2	CKLF-like MARVEL transmembrane domain containing 2	FALSE	Homo sapiens CKLF-like MARVEL transmembrane domain containing 2 (CMTM2), transcript variant 1, mRNA [NM_144673]	146225	GO:0006935|GO:0005654|GO:0016021|GO:0005615|GO:0005125	66621898	chr16	66621839	+	hs|16q21	NM_144673	chr16:66621839-66621898	NM_144673	Hs.195685
A_23_P48481	2.0277	1.01984	2.0277	up	RAD51B	RAD51 paralog B	FALSE	Homo sapiens RAD51 paralog B (RAD51B), transcript variant 2, mRNA [NM_133510]	5890	GO:0000400|GO:0005515|GO:0005657|GO:0005634|GO:0006310|GO:0003677|GO:0005524|GO:0010971|GO:0003690|GO:0006281|GO:0003697|GO:0007596|GO:0000724|GO:0005654|GO:0033063|GO:0008094|GO:0007131	68934895	chr14	68878192	+	hs|14q24.1	NM_133510	chr14:68878192-68934895	NM_133510	Hs.172587
A_24_P48723	2.6284	1.39419	2.6284	up	PTGIS	prostaglandin I2 (prostacyclin) synthase	FALSE	Homo sapiens prostaglandin I2 (prostacyclin) synthase (PTGIS), mRNA [NM_000961]	5740	GO:0005515|GO:0019369|GO:0006805|GO:0005783|GO:0019674|GO:0006767|GO:0005634|GO:0006769|GO:0044281|GO:0005615|GO:0006690|GO:0004497|GO:0035360|GO:0001516|GO:0045019|GO:0071354|GO:0019371|GO:0005506|GO:0071456|GO:0032088|GO:0097190|GO:0045766|GO:0006766|GO:1900119|GO:0050728|GO:0005901|GO:0008116|GO:0071347|GO:0005789|GO:0016021|GO:0016705|GO:0055114|GO:0020037	48120507	chr20	48120448	-	hs|20q13.13	NM_000961	chr20:48120507-48120448	NM_000961	Hs.302085
A_23_P501713	2.13316	1.093	2.13316	up	IL1F10	interleukin 1 family, member 10 (theta)	FALSE	Homo sapiens interleukin 1 family, member 10 (theta) (IL1F10), transcript variant 1, mRNA [NM_032556]	84639	GO:0005149|GO:0019221|GO:0005615|GO:0005125	113832925	chr2	113832866	+	hs|2q13	NM_032556	chr2:113832866-113832925	NM_032556	Hs.306974
A_24_P142151	4.42747	2.14648	4.42747	up	LRRC28	leucine rich repeat containing 28	FALSE	Homo sapiens leucine rich repeat containing 28 (LRRC28), transcript variant 1, mRNA [NM_144598]	123355		99903359	chr15	99901706	+	hs|15q26.3	NM_144598	chr15:99901706-99903359	NM_144598	Hs.578684
A_33_P3377994	2.00767	1.00553	2.00767	up	WNK4	WNK lysine deficient protein kinase 4	FALSE	Homo sapiens WNK lysine deficient protein kinase 4 (WNK4), mRNA [NM_032387]	65266	GO:0005515|GO:0006821|GO:0090188|GO:0050801|GO:0070294|GO:0005524|GO:0019869|GO:0035556|GO:0005737|GO:0008104|GO:0004674|GO:0050794|GO:0072156|GO:0006468|GO:0005923|GO:0006811	40946873	chr17	40946814	+	hs|17q21.31	NM_032387	chr17:40946814-40946873	NM_032387	Hs.105448
A_33_P3298750	3.00324	1.58652	3.00324	up			FALSE	Homo sapiens cDNA clone IMAGE:3463076. [BC012881]			47319596	chr20	47319537	+	hs|20q13.13	BC012881	chr20:47319537-47319596
A_24_P32085	2.41905	1.27444	2.41905	up	MOB3B	MOB kinase activator 3B	FALSE	Homo sapiens MOB kinase activator 3B (MOB3B), mRNA [NM_024761]	79817	GO:0005515|GO:0046872	27326043	chr9	27325984	-	hs|9p21.2	NM_024761	chr9:27326043-27325984	NM_024761	Hs.369022
A_33_P3292130	2.44531	1.29002	2.44531	up	XLOC_l2_013383		FALSE	BROAD Institute lincRNA (XLOC_l2_013383), lincRNA [TCONS_l2_00025857]			45851133	chr7	45851074	+	hs|7p12.3		chr7:45851074-45851133
A_33_P3239884	7.2932	2.86655	7.2932	up	NCAM2	neural cell adhesion molecule 2	FALSE	Homo sapiens neural cell adhesion molecule 2 (NCAM2), mRNA [NM_004540]	4685	GO:0030424|GO:0007608|GO:0007413|GO:0005886|GO:0016021|GO:0007158	22910476	chr21	22910417	+	hs|21q21.1	NM_004540	chr21:22910417-22910476	NM_004540	Hs.473450
A_33_P3419621	2.31612	1.21171	2.31612	up	LOC100289580	uncharacterized LOC100289580	FALSE	Homo sapiens uncharacterized LOC100289580 (LOC100289580), long non-coding RNA [NR_103774]	100289580		88807807	chr16	88807748	+	hs|16q24.3	NR_103774	chr16:88807748-88807807	NR_103774	Hs.437712
A_21_P0005784	2.17358	1.12007	2.17358	up	lnc-ERICH1-2	lnc-ERICH1-2:4	FALSE	LNCipedia lincRNA (lnc-ERICH1-2), lincRNA [lnc-ERICH1-2:4]			1237123	chr8	1237064	-	hs|8p23.3		chr8:1237123-1237064
A_23_P254165	3.02477	1.59683	3.02477	up	RAI2	retinoic acid induced 2	FALSE	Homo sapiens retinoic acid induced 2 (RAI2), transcript variant 2, mRNA [NM_021785]	10742	GO:0005515|GO:0003674|GO:0009790|GO:0005575	17818437	chrX	17818378	-	hs|Xp22.13	NM_021785	chrX:17818437-17818378	NM_021785	Hs.446680
A_33_P3276758	2.85061	1.51127	2.85061	up			FALSE				33070798	chr16	33070739	+	hs|16p11.2		chr16:033070739-033070798
A_21_P0003727	2.30187	1.20281	2.30187	up	lnc-GPR125-1	lnc-GPR125-1:1	FALSE	LNCipedia lincRNA (lnc-GPR125-1), lincRNA [lnc-GPR125-1:1]			22346807	chr4	22346156	-	hs|4p15.2		chr4:22346807-22346156
A_21_P0006670	2.1195	1.08372	2.1195	up	PARD3-AS1	PARD3 antisense RNA 1	FALSE	Homo sapiens PARD3 antisense RNA 1 (PARD3-AS1), long non-coding RNA [NR_108043]	100505601		35105296	chr10	35105237	+	hs|10p11.21		chr10:35105237-35105296	NR_108043
A_33_P3408665	5.86431	2.55196	5.86431	up			FALSE				50036	chrUn_gl000217	49977	+			chrUn_gl000217:000049977-000050036
A_33_P3289167	2.05492	1.03908	2.05492	up	ZBTB32	zinc finger and BTB domain containing 32	FALSE	Homo sapiens zinc finger and BTB domain containing 32 (ZBTB32), mRNA [NM_014383]	27033	GO:0005515|GO:0030097|GO:0006366|GO:0003714|GO:0005634|GO:0000122|GO:0000228|GO:0001817|GO:0003677|GO:0006281|GO:0042098|GO:0005654|GO:0008270	36206726	chr19	36206667	+	hs|19q13.12	NM_014383	chr19:36206667-36206726	NM_014383	Hs.99430
A_23_P87072	2.57162	1.36268	2.57162	up	PANX3	pannexin 3	FALSE	Homo sapiens pannexin 3 (PANX3), mRNA [NM_052959]	116337	GO:0005886|GO:0007267|GO:0005921|GO:0055077|GO:0016021|GO:0055085|GO:0034214|GO:0006811	124489906	chr11	124489847	+	hs|11q24.2	NM_052959	chr11:124489847-124489906	NM_052959	Hs.99235
A_21_P0005703	2.1646	1.1141	2.1646	up	lnc-RAB2A-1	lnc-RAB2A-1:1	FALSE	LNCipedia lincRNA (lnc-RAB2A-1), lincRNA [lnc-RAB2A-1:1]			60987285	chr8	60987226	+	hs|8q12.1		chr8:60987226-60987285
A_33_P3872301	2.3992	1.26256	2.3992	up	SNAR-C3	small ILF3/NF90-associated RNA C3	FALSE	602075775F1 NIH_MGC_62 Homo sapiens cDNA clone IMAGE:4242834 5', mRNA sequence [BF570763]	100170226							BF570763			Hs.467061
A_21_P0001638	2.6455	1.40354	2.6455	up	lnc-RP5-915N17.9.1-1	lnc-RP5-915N17.9.1-1:1	FALSE	LNCipedia lincRNA (lnc-RP5-915N17.9.1-1), lincRNA [lnc-RP5-915N17.9.1-1:1]			229027257	chr1	229027198	-	hs|1q42.13		chr1:229027257-229027198		Hs.376995
A_33_P3294836	2.78006	1.47512	2.78006	up	C6orf211	chromosome 6 open reading frame 211	FALSE	Homo sapiens chromosome 6 open reading frame 211 (C6orf211), transcript variant 1, mRNA [NM_024573]	79624		151789579	chr6	151789520	+	hs|6q25.1	NM_024573	chr6:151789520-151789579	NM_024573	Hs.15929
A_24_P127312	2.19287	1.13282	2.19287	up			FALSE	ribosomal protein L17 pseudogene 33 [Source:HGNC Symbol;Acc:HGNC:36654] [ENST00000498256]			29490100	chr8	29490041	+	hs|8p12		chr8:29490041-29490100
A_33_P3306217	2.58775	1.3717	2.58775	up	TRIM39	tripartite motif containing 39	FALSE	Homo sapiens tripartite motif containing 39 (TRIM39), transcript variant 2, mRNA [NM_172016]	56658	GO:0005739|GO:0005515|GO:0016567|GO:0016874|GO:2001235|GO:0006915|GO:0008270|GO:2000059|GO:0042802|GO:0005829	30309837	chr6	30309778	+	hs|6p22.1	NM_172016	chr6:30309778-30309837	NM_172016	Hs.413493
A_21_P0001447	2.44266	1.28845	2.44266	up			FALSE	PREDICTED: Homo sapiens uncharacterized LOC102724382 (LOC102724382), ncRNA [XR_425118]			246855123	chr1	246855064	+	hs|1q44	XR_425118	chr1:246855064-246855123	XR_425118
A_21_P0005187	51.0314	5.67331	51.0314	up	lnc-DLL1-4	lnc-DLL1-4:1	FALSE	LNCipedia lincRNA (lnc-DLL1-4), lincRNA [lnc-DLL1-4:1]			170453210	chr6	170453151	-	hs|6q27		chr6:170453210-170453151
A_33_P3395547	2.64502	1.40328	2.64502	up	HYALP1	hyaluronoglucosaminidase pseudogene 1	FALSE	Homo sapiens hyaluronoglucosaminidase pseudogene 1 (HYALP1), non-coding RNA [NR_002731]	26062		123459483	chr7	123459424	+	hs|7q31.32		chr7:123459424-123459483	NR_002731	Hs.381305
A_32_P211248	4.14284	2.05062	4.14284	up	LINC01405	long intergenic non-protein coding RNA 1405	FALSE	Homo sapiens long intergenic non-protein coding RNA 1405 (LINC01405), long non-coding RNA [NR_036513]	100131138		111375252	chr12	111375193	+	hs|12q24.11	NR_036513	chr12:111375193-111375252	NR_036513	Hs.152129
A_24_P359191	2.05807	1.0413	2.05807	up	SLC6A6	solute carrier family 6 (neurotransmitter transporter), member 6	FALSE	Homo sapiens solute carrier family 6 (neurotransmitter transporter), member 6 (SLC6A6), transcript variant 1, mRNA [NM_003043]	6533	GO:0006520|GO:0005886|GO:0005328|GO:0006865|GO:0055085|GO:0030977|GO:0005887|GO:0015734|GO:0006810|GO:0006836|GO:0016021|GO:0005369|GO:0006811	14489120	chr3	14487331	+	hs|3p25.1	NM_003043	chr3:14487331-14489120	NM_003043	Hs.529488
A_21_P0006336	12.1725	3.60556	12.1725	up	lnc-AGPAT2-2	lnc-AGPAT2-2:4	FALSE	LNCipedia lincRNA (lnc-AGPAT2-2), lincRNA [lnc-AGPAT2-2:4]			139506605	chr9	139506546	-	hs|9q34.3		chr9:139506605-139506546		Hs.609301
A_33_P3323188	2.17062	1.11811	2.17062	up	LOC728743	zinc finger protein pseudogene	FALSE	Homo sapiens zinc finger protein pseudogene (LOC728743), non-coding RNA [NR_027237]	728743		150109553	chr7	150109494	+	hs|7q36.1		chr7:150109494-150109553	NR_027237	Hs.650365
A_21_P0000884	2.09927	1.06989	2.09927	up	ERVK13-1	endogenous retrovirus group K13, member 1	FALSE	Homo sapiens endogenous retrovirus group K13, member 1 (ERVK13-1), long non-coding RNA [NR_040023]	100507321	GO:0005886|GO:0005198|GO:0019031|GO:0016021	2708449	chr16	2708390	-	hs|16p13.3	NR_040023	chr16:2708449-2708390	NR_040023	Hs.406976
A_33_P3224867	2.29493	1.19845	2.29493	up	GSG1	germ cell associated 1	FALSE	Homo sapiens germ cell associated 1 (GSG1), transcript variant 5, mRNA [NM_001206842]	83445	GO:0005789|GO:0016021|GO:0070063	13256497	chr12	13256438	-	hs|12p13.1	NM_001206842	chr12:13256497-13256438	NM_001206842	Hs.240053
A_33_P3275722	2.60649	1.38211	2.60649	up	LY6G6D	lymphocyte antigen 6 complex, locus G6D	FALSE	Homo sapiens lymphocyte antigen 6 complex, locus G6D (LY6G6D), mRNA [NM_021246]	58530	GO:0005886|GO:0031225|GO:0030175	31685581	chr6	31685522	+	hs|6p21.33	NM_021246	chr6:31685522-31685581	NM_021246	Hs.591792
A_33_P3396244	2.47085	1.30501	2.47085	up	NPY2R	neuropeptide Y receptor Y2	FALSE	Homo sapiens neuropeptide Y receptor Y2 (NPY2R), mRNA [NM_000910]	4887	GO:0005515|GO:0005886|GO:0007263|GO:0030818|GO:0051048|GO:2000252|GO:0003214|GO:0007204|GO:0007193|GO:0007218|GO:0045987|GO:0004872|GO:0001662|GO:0007626|GO:0031645|GO:0046010|GO:0005246|GO:0051967|GO:0002793|GO:0031513|GO:0003151|GO:0046903|GO:0045785|GO:0090394|GO:0004983|GO:0005887|GO:0001601|GO:0051930|GO:0033603	156136219	chr4	156136160	+	hs|4q32.1	NM_000910	chr4:156136160-156136219	NM_000910	Hs.37125
A_23_P159191	2.12469	1.08725	2.12469	up	GAST	gastrin	FALSE	Homo sapiens gastrin (GAST), mRNA [NM_000805]	2520	GO:0005515|GO:0007165|GO:0007186|GO:0005179|GO:0005576	39872132	chr17	39872073	+	hs|17q21.2	NM_000805	chr17:39872073-39872132	NM_000805	Hs.2681
A_23_P114713	3.27251	1.7104	3.27251	up	CYP4B1	cytochrome P450, family 4, subfamily B, polypeptide 1	FALSE	Homo sapiens cytochrome P450, family 4, subfamily B, polypeptide 1 (CYP4B1), transcript variant 2, mRNA [NM_000779]	1580	GO:0006805|GO:0005506|GO:0070330|GO:0018879|GO:0044281|GO:0019825|GO:0042738|GO:0008144|GO:0018585|GO:0018917|GO:0005789|GO:0020037|GO:0055114	47284815	chr1	47284756	+	hs|1p33	NM_000779	chr1:47284756-47284815	NM_000779	Hs.436317
A_21_P0014766	4.04947	2.01773	4.04947	up			FALSE
A_33_P3360525	2.27117	1.18344	2.27117	up			FALSE	AGENCOURT_10185273 NIH_MGC_126 Homo sapiens cDNA clone IMAGE:6562423 5', mRNA sequence [BU535024]			97949085	chr10	97949026	-	hs|10q24.1	BU535024	chr10:97949085-97949026		Hs.621182
A_21_P0010019	2.04521	1.03225	2.04521	up	lnc-FOXA2-1	lnc-FOXA2-1:3	FALSE	LNCipedia lincRNA (lnc-FOXA2-1), lincRNA [lnc-FOXA2-1:3]			22569873	chr20	22569814	-	hs|20p11.21		chr20:22569873-22569814
A_23_P101380	2.2673	1.18098	2.2673	up	B3GNT8	UDP-GlcNAc:betaGal beta-1,3-N-acetylglucosaminyltransferase 8	FALSE	Homo sapiens UDP-GlcNAc:betaGal beta-1,3-N-acetylglucosaminyltransferase 8 (B3GNT8), mRNA [NM_198540]	374907	GO:0006493|GO:0000139|GO:0030311|GO:0016262|GO:0016266|GO:0016021|GO:0044267|GO:0008378|GO:0070062|GO:0043687	41931342	chr19	41931283	-	hs|19q13.2	NM_198540	chr19:41931342-41931283	NM_198540	Hs.441681
A_33_P3798739	2.2127	1.14581	2.2127	up	LOC286382	uncharacterized LOC286382	FALSE	Homo sapiens cDNA FLJ37037 fis, clone BRACE2011611. [AK094356]	286382		73674019	chr9	73673960	-	hs|9q21.12	AK094356	chr9:73674019-73673960		Hs.668691
A_21_P0004995	2.02089	1.01499	2.02089	up	lnc-ECI2-3	lnc-ECI2-3:1	FALSE	LNCipedia lincRNA (lnc-ECI2-3), lincRNA [lnc-ECI2-3:1]			4399978	chr6	4399919	-	hs|6p25.1		chr6:4399978-4399919
A_23_P64161	3.55178	1.82854	3.55178	up	ANGPTL5	angiopoietin-like 5	FALSE	Homo sapiens angiopoietin-like 5 (ANGPTL5), mRNA [NM_178127]	253935	GO:0005576	101762163	chr11	101762104	-	hs|11q22.1	NM_178127	chr11:101762163-101762104	NM_178127	Hs.318370
A_21_P0000610	2.0733	1.05193	2.0733	up	LINC01060	long intergenic non-protein coding RNA 1060	FALSE	Homo sapiens long intergenic non-protein coding RNA 1060 (LINC01060), long non-coding RNA [NR_033869]	401164		189523059	chr4	189523000	+	hs|4q35.2	NR_033869	chr4:189523000-189523059	NR_033869	Hs.435756
A_21_P0009009	3.87717	1.95501	3.87717	up			FALSE	ens			11506783	chr16	11506724	-	hs|16p13.13		chr16:11506783-11506724
A_32_P31963	4.70187	2.23323	4.70187	up	LINC01485	long intergenic non-protein coding RNA 1485	FALSE	Homo sapiens long intergenic non-protein coding RNA 1485 (LINC01485), long non-coding RNA [NR_108028]	101928154		173214053	chr5	173213994	-	hs|5q35.2	NR_108028	chr5:173214053-173213994	NR_108028
A_32_P331052	4.60602	2.20352	4.60602	up	RBBP8NL	RBBP8 N-terminal like	FALSE	Homo sapiens RBBP8 N-terminal like (RBBP8NL), mRNA [NM_080833]	140893	GO:0005615	60987695	chr20	60986009	-	hs|20q13.33	NM_080833	chr20:60987695-60986009	NM_080833	Hs.180374
A_33_P3384617	2.83745	1.50459	2.83745	up	XLOC_l2_003882		FALSE	BROAD Institute lincRNA (XLOC_l2_003882), lincRNA [TCONS_l2_00007046]			19380231	chr13	19380172	-	hs|13q11		chr13:19380231-19380172		Hs.558816
A_21_P0000069	3.26652	1.70776	3.26652	up	VEPH1	ventricular zone expressed PH domain-containing 1	FALSE	Homo sapiens ventricular zone expressed PH domain-containing 1 (VEPH1), transcript variant 4, mRNA [NM_001167915]	79674	GO:0005886	157177620	chr3	157177561	-	hs|3q25.32	NM_001167915	chr3:157177620-157177561	NM_001167915	Hs.658046
A_32_P208823	2.89337	1.53275	2.89337	up	PLXDC1	plexin domain containing 1	FALSE	Homo sapiens plexin domain containing 1 (PLXDC1), mRNA [NM_020405]	57125	GO:0005515|GO:0005886|GO:0021510|GO:0005576|GO:0001525|GO:0005615|GO:0030425|GO:0043235|GO:0005622|GO:0005737|GO:0043025|GO:0004872|GO:0005923|GO:0016021	37220029	chr17	37219970	-	hs|17q12	NM_020405	chr17:37220029-37219970	NM_020405	Hs.125036
A_21_P0002976	2.19011	1.13101	2.19011	up	lnc-GPR27-2	lnc-GPR27-2:1	FALSE	LNCipedia lincRNA (lnc-GPR27-2), lincRNA [lnc-GPR27-2:1]			72045553	chr3	72045494	+	hs|3p13		chr3:72045494-72045553
A_21_P0014659	2.03645	1.02605	2.03645	up			FALSE	UI-E-CQ1-acu-d-11-0-UI.s1 UI-E-CQ1 Homo sapiens cDNA clone UI-E-CQ1-acu-d-11-0-UI 3', mRNA sequence [BU727401]			15665529	chrX	15665470	-	hs|Xp22.2	BU727401	chrX:15665529-15665470		Hs.730266
A_33_P3325120	2.59202	1.37408	2.59202	up	SOX13	SRY (sex determining region Y)-box 13	FALSE	SRY (sex determining region Y)-box 13 [Source:HGNC Symbol;Acc:HGNC:11192] [ENST00000367203]	9580	GO:0043565|GO:0005515|GO:0006355|GO:0003700|GO:0045586|GO:0005654|GO:0005634|GO:0009653|GO:0006351	204088859	chr1	204088800	+	hs|1q32.1	BC040649	chr1:204088800-204088859
A_21_P0005436	8.03432	3.00618	8.03432	up	lnc-CHRM2-2	lnc-CHRM2-2:3	FALSE	LNCipedia lincRNA (lnc-CHRM2-2), lincRNA [lnc-CHRM2-2:3]			135864665	chr7	135864606	+	hs|7q33		chr7:135864606-135864665
A_33_P3275199	2.02779	1.01991	2.02779	up	JRK	Jrk homolog (mouse)	FALSE	Homo sapiens Jrk homolog (mouse) (JRK), transcript variant 1, mRNA [NM_003724]	8629	GO:0005515|GO:0008150|GO:0003674|GO:0005737|GO:0030529|GO:0005634|GO:0005575|GO:0003729|GO:0003677	143739085	chr8	143739026	-	hs|8q24.3	NM_003724	chr8:143739085-143739026	NM_003724	Hs.535903
A_33_P3246950	3.42402	1.77569	3.42402	up			FALSE	BX117927 Soares_NFL_T_GBC_S1 Homo sapiens cDNA clone IMAGp998E153901, mRNA sequence [BX117927]			13894064	chr7	13894005	-	hs|7p21.2		chr7:13894064-13894005		Hs.127078
A_33_P3283744	2.09464	1.0667	2.09464	up	LOC100132249	uncharacterized LOC100132249	FALSE	PREDICTED: Homo sapiens family with sequence similarity 201, member B (FAM201B), misc_RNA [XR_158980]	100132249		45355587	chr9	45355528	-	hs|9p11.2	XR_158980	chr9:45355587-45355528	XR_158980	Hs.98178
A_24_P403561	3.53578	1.82203	3.53578	up	LRP4	low density lipoprotein receptor-related protein 4	FALSE	Homo sapiens low density lipoprotein receptor-related protein 4 (LRP4), mRNA [NM_002334]	4038	GO:0005515|GO:0031594|GO:0051290|GO:0009954|GO:0009953|GO:0016600|GO:0030425|GO:0042803|GO:0030279|GO:0030198|GO:0097110|GO:0043025|GO:0042475|GO:0016055|GO:0090090|GO:0001942|GO:0030971|GO:0009986|GO:0001822|GO:0005509|GO:0014069|GO:0006897|GO:0097104|GO:0048813|GO:0097105|GO:0050808|GO:0097060|GO:0060173|GO:0051124|GO:0001932|GO:0050771|GO:0016021|GO:0034185|GO:0071340|GO:0042733	46878608	chr11	46878549	-	hs|11p11.2	NM_002334	chr11:46878608-46878549	NM_002334	Hs.4930
A_23_P414211	2.52798	1.33798	2.52798	up	PAX4	paired box 4	FALSE	Homo sapiens paired box 4 (PAX4), mRNA [NM_006193]	5078	GO:0043066|GO:0060041|GO:0042493|GO:0045597|GO:0001206|GO:0000122|GO:0051591|GO:0003677|GO:0006351|GO:0030154|GO:0003690|GO:0031018|GO:0007623|GO:0009887|GO:0000980|GO:0005654	127250825	chr7	127250766	-	hs|7q32.1	NM_006193	chr7:127250825-127250766	NM_006193	Hs.129706
A_21_P0009632	2.10652	1.07486	2.10652	up	lnc-LMAN1-1	lnc-LMAN1-1:1	FALSE	LNCipedia lincRNA (lnc-LMAN1-1), lincRNA [lnc-LMAN1-1:1]			57053928	chr18	57053869	-	hs|18q21.32		chr18:57053928-57053869
A_23_P93169	3.51584	1.81387	3.51584	up	LGSN	lengsin, lens protein with glutamine synthetase domain	FALSE	Homo sapiens lengsin, lens protein with glutamine synthetase domain (LGSN), transcript variant 1, mRNA [NM_016571]	51557	GO:0005886|GO:0004356|GO:0006542	63989680	chr6	63989621	-	hs|6q12	NM_016571	chr6:63989680-63989621	NM_016571	Hs.149585
A_23_P58169	2.52551	1.33658	2.52551	up	NPY2R	neuropeptide Y receptor Y2	FALSE	Homo sapiens neuropeptide Y receptor Y2 (NPY2R), mRNA [NM_000910]	4887	GO:0005515|GO:0005886|GO:0007263|GO:0030818|GO:0051048|GO:2000252|GO:0003214|GO:0007204|GO:0007193|GO:0007218|GO:0045987|GO:0004872|GO:0001662|GO:0007626|GO:0031645|GO:0046010|GO:0005246|GO:0051967|GO:0002793|GO:0031513|GO:0003151|GO:0046903|GO:0045785|GO:0090394|GO:0004983|GO:0005887|GO:0001601|GO:0051930|GO:0033603	156138102	chr4	156138043	+	hs|4q32.1	NM_000910	chr4:156138043-156138102	NM_000910	Hs.37125
A_24_P173746	2.50854	1.32685	2.50854	up	RALGPS2	Ral GEF with PH domain and SH3 binding motif 2	FALSE	Homo sapiens Ral GEF with PH domain and SH3 binding motif 2 (RALGPS2), transcript variant 10, mRNA [NM_152663]	55103	GO:0043547|GO:0005085|GO:0005737|GO:0005886|GO:0007264	178871278	chr1	178866870	+	hs|1q25.2	NM_152663	chr1:178866870-178871278	NM_152663	Hs.632485
A_21_P0008678	2.48347	1.31236	2.48347	up			FALSE				94041960	chr15	94041901	+	hs|15q26.1		chr15:94041901-94041960
A_33_P3254121	2.74078	1.45459	2.74078	up	RNASET2	ribonuclease T2	FALSE	ribonuclease T2 [Source:HGNC Symbol;Acc:HGNC:21686] [ENST00000358165]	8635	GO:0003723|GO:0033897|GO:0005788|GO:0005576|GO:0004540|GO:0005764|GO:0005615|GO:0070062|GO:0043202|GO:0006401	167347487	chr6	167347428	-	hs|6q27	AK001769	chr6:167347487-167347428
A_33_P3217559	2.84232	1.50707	2.84232	up	DLK1	delta-like 1 homolog (Drosophila)	FALSE	Homo sapiens delta-like 1 homolog (Drosophila) (DLK1), mRNA [NM_003836]	8788	GO:0010468|GO:0045746|GO:0003674|GO:0007219|GO:0048706|GO:0007275|GO:0016021|GO:0009791|GO:0005615|GO:0030154|GO:0009897	101200645	chr14	101200586	+	hs|14q32.2	NM_003836	chr14:101200586-101200645	NM_003836	Hs.533717
A_21_P0002357	3.01982	1.59446	3.01982	up	lnc-SLC4A3-5	lnc-SLC4A3-5:1	FALSE	LNCipedia lincRNA (lnc-SLC4A3-5), lincRNA [lnc-SLC4A3-5:1]			220805415	chr2	220782621	+	hs|2q35		chr2:220782621-220805415
A_21_P0001759	3.93797	1.97745	3.93797	up	lnc-TLR5-1	lnc-TLR5-1:2	FALSE	LNCipedia lincRNA (lnc-TLR5-1), lincRNA [lnc-TLR5-1:2]			223267610	chr1	223267551	-	hs|1q41		chr1:223267610-223267551
A_21_P0000617	2.06593	1.04679	2.06593	up	LIMD1-AS1	LIMD1 antisense RNA 1	FALSE	Homo sapiens LIMD1 antisense RNA 1 (LIMD1-AS1), long non-coding RNA [NR_033947]	644714		45719740	chr3	45719681	-	hs|3p21.31	NR_033947	chr3:45719740-45719681	NR_033947	Hs.712889
A_19_P00802413	2.16897	1.11701	2.16897	up	PIEZO1	piezo-type mechanosensitive ion channel component 1	FALSE	Homo sapiens piezo-type mechanosensitive ion channel component 1 (PIEZO1), mRNA [NM_001142864]	9780	GO:0008381|GO:0005261|GO:0050982|GO:0005886|GO:0005783|GO:0033116|GO:0042391|GO:0005789|GO:0016021|GO:0033634|GO:0033625|GO:0006812	88815851	chr16	88815792	-	hs|16q24.3	NM_001142864	chr16:88815851-88815792	NM_001142864	Hs.377001
A_33_P3345016	2.57293	1.36341	2.57293	up	HTR6	5-hydroxytryptamine (serotonin) receptor 6, G protein-coupled	FALSE	Homo sapiens 5-hydroxytryptamine (serotonin) receptor 6, G protein-coupled (HTR6), mRNA [NM_000871]	3362	GO:0005515|GO:0032008|GO:0005886|GO:0042493|GO:0014050|GO:0014053|GO:0007268|GO:0060291|GO:0014054|GO:0004969|GO:0030425|GO:0007210|GO:0014058|GO:0005929|GO:0004993|GO:0021795|GO:0005887|GO:0007187|GO:0007612|GO:0032355|GO:0033603	20005528	chr1	20005469	+	hs|1p36.13	NM_000871	chr1:20005469-20005528	NM_000871	Hs.22180
A_33_P3413840	2.10521	1.07396	2.10521	up	GK	glycerol kinase	FALSE	Homo sapiens glycerol kinase (GK), transcript variant 4, mRNA [NM_001205019]	2710	GO:0005515|GO:0004370|GO:0019563|GO:0005634|GO:0005741|GO:0044281|GO:0042593|GO:0005524|GO:0006071|GO:0046167|GO:0005829|GO:0016310|GO:0019432|GO:0006641|GO:0044255|GO:0070062	30746989	chrX	30739101	+	hs|Xp21.2	NM_001205019	chrX:30739101-30746989	NM_001205019	Hs.1466
A_33_P3249649	2.02675	1.01917	2.02675	up	CACTIN-AS1	CACTIN antisense RNA 1	FALSE	Homo sapiens CACTIN antisense RNA 1 (CACTIN-AS1), long non-coding RNA [NR_038865]	404665		3613928	chr19	3613869	+	hs|19p13.3	NR_038865	chr19:3613869-3613928	NR_038865	Hs.719726
A_24_P96762	2.05057	1.03603	2.05057	up	TRNAU1AP	tRNA selenocysteine 1 associated protein 1	FALSE	Homo sapiens tRNA selenocysteine 1 associated protein 1 (TRNAU1AP), transcript variant 1, mRNA [NM_017846]	54952	GO:0005737|GO:0000166|GO:0001514|GO:0005634	28904966	chr1	28904907	+	hs|1p35.3	NM_017846	chr1:28904907-28904966	NM_017846	Hs.533626
A_23_P419202	2.05309	1.0378	2.05309	up	ZNF658	zinc finger protein 658	FALSE	Homo sapiens zinc finger protein 658 (ZNF658), mRNA [NM_033160]	26149	GO:0006355|GO:0003700|GO:0005634|GO:0003677|GO:0046872|GO:0006351	40772009	chr9	40771950	-	hs|9p13.1	NM_033160	chr9:40772009-40771950	NM_033160	Hs.522147
A_33_P3306207	2.57306	1.36348	2.57306	up	KLRG2	killer cell lectin-like receptor subfamily G, member 2	FALSE	Homo sapiens killer cell lectin-like receptor subfamily G, member 2 (KLRG2), mRNA [NM_198508]	346689	GO:0030246|GO:0016021	139138917	chr7	139138858	-	hs|7q34	NM_198508	chr7:139138917-139138858	NM_198508	Hs.17572
A_21_P0012477	2.06585	1.04674	2.06585	up	XLOC_l2_010493		FALSE	BROAD Institute lincRNA (XLOC_l2_010493), lincRNA [TCONS_l2_00019671]			193719515	chr3	193719456	-	hs|3q29		chr3:193719515-193719456
A_23_P27353	2.09558	1.06735	2.09558	up	SLC14A2	solute carrier family 14 (urea transporter), member 2	FALSE	Homo sapiens solute carrier family 14 (urea transporter), member 2 (SLC14A2), transcript variant 1, mRNA [NM_007163]	8170	GO:0005515|GO:0016324|GO:0016020|GO:0005886|GO:0015204|GO:0016021|GO:0071918|GO:0055085|GO:0050839|GO:0015840	43262629	chr18	43262570	+	hs|18q12.3	NM_007163	chr18:43262570-43262629	NM_007163	Hs.710927
A_21_P0000249	3.22113	1.68757	3.22113	up	SNORD24	small nucleolar RNA, C/D box 24	FALSE	Homo sapiens small nucleolar RNA, C/D box 24 (SNORD24), small nucleolar RNA [NR_002447]	26820		136216325	chr9	136216266	+	hs|9q34.2	NR_002447	chr9:136216266-136216325	NR_002447	Hs.745542
A_21_P0011406	6.81094	2.76785	6.81094	up			FALSE	Gene marker which use for analyse sensitivity to treatment cancer with anti-tumor agent combined with radiotheraphy. [DJ031154]			100379181	chr15	100379122	+	hs|15q26.3		chr15:100379122-100379181
A_21_P0013705	13.0599	3.70707	13.0599	up			FALSE	topoisomerase I binding, arginine/serine-rich like, pseudogene [Source:HGNC Symbol;Acc:HGNC:50276] [ENST00000469756]			107048956	chr9	107048897	+	hs|9q31.1		chr9:107048897-107048956
A_23_P218126	2.20172	1.13863	2.20172	up			FALSE	immunoglobulin heavy constant gamma 1 (G1m marker) [Source:HGNC Symbol;Acc:HGNC:5525] [ENST00000612473]			106208310	chr14	106208251	-	hs|14q32.33	BC024289	chr14:106208310-106208251		Hs.510635
A_21_P0007203	7.6951	2.94394	7.6951	up	lnc-PRDM11-2	lnc-PRDM11-2:1	FALSE	LNCipedia lincRNA (lnc-PRDM11-2), lincRNA [lnc-PRDM11-2:1]			45063146	chr11	45030105	+	hs|11p11.2		chr11:45030105-45063146
A_21_P0013359	3.08016	1.623	3.08016	up	LOC285889	uncharacterized LOC285889	FALSE	Homo sapiens uncharacterized LOC285889 (LOC285889), long non-coding RNA [NR_038232]	285889		156233987	chr7	156233928	-	hs|7q36.3		chr7:156233987-156233928	NR_038232	Hs.407095
A_23_P333129	3.20644	1.68097	3.20644	up			FALSE	double homeobox 4 like 11 [Source:HGNC Symbol;Acc:HGNC:38687] [ENST00000611504]			73992	chrUn_gl000228	73925	+		XM_006718102	chrUn_gl000228:73925-73992	XM_006718102	Hs.725918
A_33_P3252333	2.00348	1.00251	2.00348	up	SNORD3B-1	small nucleolar RNA, C/D box 3B-1	FALSE	Homo sapiens small nucleolar RNA, C/D box 3B-1 (SNORD3B-1), small nucleolar RNA [NR_003271]	26851		18965311	chr17	18965252	+	hs|17p11.2	NR_003271	chr17:18965252-18965311	NR_003271	Hs.658815
A_23_P8142	2.26541	1.17977	2.26541	up	CLPS	colipase, pancreatic	FALSE	Homo sapiens colipase, pancreatic (CLPS), transcript variant 1, mRNA [NM_001832]	1208	GO:0016042|GO:0006629|GO:0007603|GO:0044241|GO:0005576|GO:0044281|GO:0043085|GO:0008047|GO:0001523|GO:0070062	35762842	chr6	35762783	-	hs|6p21.31	NM_001832	chr6:35762842-35762783	NM_001832	Hs.1340
A_21_P0011892	2.32358	1.21635	2.32358	up	lnc-CXXC11-4	lnc-CXXC11-4:5	FALSE	LNCipedia lincRNA (lnc-CXXC11-4), lincRNA [lnc-CXXC11-4:5]			242876193	chr2	242876134	+	hs|2q37.3		chr2:242876134-242876193
A_33_P3332382	2.30381	1.20402	2.30381	up	LOC100129406	uncharacterized LOC100129406	FALSE	Homo sapiens cDNA FLJ35472 fis, clone SMINT2007062. [AK092791]	100129406		112939248	chr1	112939189	+	hs|1p13.2	AK092791	chr1:112939189-112939248		Hs.744100
A_24_P230938	2.0244	1.0175	2.0244	up	MORN4	MORN repeat containing 4	FALSE	Homo sapiens MORN repeat containing 4, mRNA (cDNA clone IMAGE:4690584), complete cds. [BC022054]	118812		99379274	chr10	99379215	-	hs|10q24.2	BC022054	chr10:99379274-99379215		Hs.217409
A_21_P0008217	4.6142	2.20608	4.6142	up	lnc-TUBGCP3-8	lnc-TUBGCP3-8:1	FALSE	LNCipedia lincRNA (lnc-TUBGCP3-8), lincRNA [lnc-TUBGCP3-8:1]			112813994	chr13	112810029	-	hs|13q34		chr13:112813994-112810029
A_21_P0000070	9.61305	3.26499	9.61305	up	IL1RAP	interleukin 1 receptor accessory protein	FALSE	Homo sapiens interleukin 1 receptor accessory protein (IL1RAP), transcript variant 6, mRNA [NM_001167931]	3556	GO:0042094|GO:0006955|GO:0006954|GO:0006461|GO:0016020|GO:0005886|GO:0005887|GO:0045087|GO:0019221|GO:0004908|GO:0005576|GO:0004871	190374967	chr3	190374908	+	hs|3q28	NM_001167931	chr3:190374908-190374967	NM_001167931	Hs.478673
A_23_P30913	2.10512	1.0739	2.10512	up	HLA-DPA1	major histocompatibility complex, class II, DP alpha 1	FALSE	Homo sapiens major histocompatibility complex, class II, DP alpha 1 (HLA-DPA1), transcript variant 1, mRNA [NM_033554]	3113	GO:0050852|GO:0005886|GO:0019221|GO:0031295|GO:0005765|GO:0019886|GO:0006955|GO:0042102|GO:0042605|GO:0071556|GO:0030658|GO:0060333|GO:0032729|GO:0012507|GO:0009986|GO:0042613|GO:0032588|GO:0030666|GO:0000139|GO:0071346|GO:0005887|GO:0050870|GO:0030669|GO:0032395|GO:0010008	33032907	chr6	33032848	-	hs|6p21.32	NM_033554	chr6:33032907-33032848	NM_033554	Hs.347270
A_33_P3216487	2.99792	1.58396	2.99792	up			FALSE				111329156	chr11	111329097	+	hs|11q23.1		chr11:111329097-111329156
A_33_P3416814	3.89749	1.96255	3.89749	up	LOC102724833	splicing factor, arginine/serine-rich 19-like	FALSE	PREDICTED: Homo sapiens splicing factor, arginine/serine-rich 19-like (LOC102724833), mRNA [XM_006714944]	102724833		180237808	chr5	180237749	-	hs|5q35.3	XM_006714944	chr5:180237808-180237749	XM_006714944
A_33_P3374478	5.83383	2.54444	5.83383	up	CASC4	cancer susceptibility candidate 4	FALSE	cancer susceptibility candidate 4 [Source:HGNC Symbol;Acc:HGNC:24892] [ENST00000429162]	113201	GO:0005794|GO:0016021	44599944	chr15	44599885	+	hs|15q15.3	AK098265	chr15:44599885-44599944		Hs.512867
A_33_P3338152	5.6476	2.49764	5.6476	up	HIF3A	hypoxia inducible factor 3, alpha subunit	FALSE	hypoxia inducible factor 3, alpha subunit [Source:HGNC Symbol;Acc:HGNC:15825] [ENST00000475432]	64344	GO:0003700|GO:0006357|GO:0006366|GO:0003714|GO:0003713|GO:0061418|GO:0071456|GO:0003677|GO:0005829|GO:0007165|GO:0046983|GO:0005654|GO:0004871	46815739	chr19	46815680	+	hs|19q13.32	XR_243952	chr19:46815680-46815739	XR_243952	Hs.420830
A_21_P0010884	16.8141	4.0716	16.8141	up	LINC00948	long intergenic non-protein coding RNA 948	FALSE	Homo sapiens long intergenic non-protein coding RNA 948 (LINC00948), transcript variant 1, long non-coding RNA [NR_038200]	100507027		61498238	chr10	61496941	-	hs|10q21.2	NR_038200	chr10:61498238-61496941	NR_038200	Hs.648790
A_21_P0009922	2.17887	1.12358	2.17887	up			FALSE				59652341	chr20	59652282	-	hs|20q13.33		chr20:59652341-59652282
A_21_P0001653	2.39518	1.26013	2.39518	up	lnc-ADSS-2	lnc-ADSS-2:1	FALSE	LNCipedia lincRNA (lnc-ADSS-2), lincRNA [lnc-ADSS-2:1]			244393229	chr1	244393170	-	hs|1q44		chr1:244393229-244393170
A_21_P0003182	4.00845	2.00304	4.00845	up	lnc-ZIC4-1	lnc-ZIC4-1:1	FALSE	LNCipedia lincRNA (lnc-ZIC4-1), lincRNA [lnc-ZIC4-1:1]			147450166	chr3	147450107	-	hs|3q24		chr3:147450166-147450107
A_21_P0011734	4.18541	2.06537	4.18541	up	LOC100505851	uncharacterized LOC100505851	FALSE	PREDICTED: Homo sapiens uncharacterized LOC100505851 (LOC100505851), misc_RNA [XR_109588]	100505851		24135032	chr19	24134973	-	hs|19p12	XR_109588	chr19:24135032-24134973	XR_109588	Hs.190888
A_24_P113131	2.51292	1.32937	2.51292	up	BZRAP1	benzodiazepine receptor (peripheral) associated protein 1	FALSE	Homo sapiens benzodiazepine receptor (peripheral) associated protein 1 (BZRAP1), transcript variant 1, mRNA [NM_004758]	9256	GO:0005739|GO:0005515|GO:0008150|GO:0005737|GO:0007268|GO:0030156|GO:0014047|GO:0007269|GO:0005829	56378659	chr17	56378600	-	hs|17q22	NM_004758	chr17:56378659-56378600	NM_004758	Hs.112499
A_21_P0013555	4.1004	2.03576	4.1004	up			FALSE				13487506	chr9	13487447	+	hs|9p23		chr9:13487447-13487506		Hs.522002
A_21_P0012657	2.72198	1.44465	2.72198	up	XLOC_l2_011044		FALSE	BROAD Institute lincRNA (XLOC_l2_011044), lincRNA [TCONS_l2_00021058]			9168533	chr4	9168474	-	hs|4p16.1		chr4:9168533-9168474		Hs.659247
A_21_P0014725	15.0775	3.91432	15.0775	up			FALSE	DKFZp781I0659_r1 781 (synonym: hlcc4) Homo sapiens cDNA clone DKFZp781I0659 5', mRNA sequence [BX954921]			14212257	chr6	14212198	+	hs|6p23	BX954921	chr6:14212198-14212257		Hs.573270
A_33_P3354137	2.04543	1.0324	2.04543	up	MAP4	microtubule-associated protein 4	FALSE	Homo sapiens microtubule-associated protein 4 (MAP4), transcript variant 3, mRNA [NM_030885]	4134	GO:0005515|GO:0008017|GO:0072686|GO:0005886|GO:0005875|GO:0005874|GO:0051294|GO:0005737|GO:0005198|GO:0051012|GO:0015630|GO:0007052|GO:0051301|GO:0070062	48130383	chr3	48130324	-	hs|3p21.31	NM_030885	chr3:48130383-48130324	NM_030885	Hs.517949
A_21_P0014747	2.07706	1.05454	2.07706	up	LOC101927895	uncharacterized LOC101927895	FALSE	PREDICTED: Homo sapiens uncharacterized LOC101927895 (LOC101927895), transcript variant X1, ncRNA [XR_241220]	101927895		19567178	chr1	19567119	+	hs|1p36.13	XR_241220	chr1:19567119-19567178	XR_241220
A_33_P3360072	2.18471	1.12744	2.18471	up	RANBP3L	RAN binding protein 3-like	FALSE	Homo sapiens RAN binding protein 3-like (RANBP3L), transcript variant 1, mRNA [NM_001161429]	202151	GO:0046907	36249181	chr5	36249122	-	hs|5p13.2	NM_001161429	chr5:36249181-36249122	NM_001161429	Hs.729817
A_21_P0006342	3.01262	1.59102	3.01262	up	lnc-DMRTA1-5	lnc-DMRTA1-5:2	FALSE	LNCipedia lincRNA (lnc-DMRTA1-5), lincRNA [lnc-DMRTA1-5:2]			23946939	chr9	23946880	+	hs|9p21.3		chr9:23946880-23946939
A_33_P3225522	2.11014	1.07734	2.11014	up	OAS2	2'-5'-oligoadenylate synthetase 2, 69/71kDa	FALSE	Homo sapiens 2'-5'-oligoadenylate synthetase 2, 69/71kDa (OAS2), transcript variant 3, mRNA [NM_001032731]	4939	GO:0003725|GO:0048471|GO:0018377|GO:0005783|GO:0001730|GO:0019221|GO:0005634|GO:0009615|GO:0005524|GO:0046872|GO:0043231|GO:0005829|GO:0006401|GO:0005739|GO:0051607|GO:0005737|GO:0006139|GO:0060337|GO:0016020|GO:0006486|GO:0008270|GO:0060333|GO:0006164	113426609	chr12	113426550	+	hs|12q24.13	NM_001032731	chr12:113426550-113426609	NM_001032731	Hs.414332
A_33_P3260066	3.06637	1.61653	3.06637	up	BEAN1	brain expressed, associated with NEDD4, 1	FALSE	Homo sapiens brain expressed, associated with NEDD4, 1 (BEAN1), transcript variant 1, mRNA [NM_001178020]	146227	GO:0016021	66516099	chr16	66516040	+	hs|16q21	NM_001178020	chr16:66516040-66516099	NM_001178020	Hs.97805
A_24_P297480	2.08179	1.05783	2.08179	up	RNF113B	ring finger protein 113B	FALSE	Homo sapiens ring finger protein 113B (RNF113B), mRNA [NM_178861]	140432	GO:0008270	98828823	chr13	98828764	-	hs|13q32.2	NM_178861	chr13:98828823-98828764	NM_178861	Hs.296045
A_33_P3402103	2.33886	1.2258	2.33886	up	STPG1	sperm-tail PG-rich repeat containing 1	FALSE	Homo sapiens sperm-tail PG-rich repeat containing 1 (STPG1), transcript variant 2, mRNA [NM_001199012]	90529	GO:0005737|GO:0006915|GO:0005634	24718151	chr1	24718092	-	hs|1p36.11	NM_001199012	chr1:24718151-24718092	NM_001199012	Hs.403187
A_32_P141238	3.6254	1.85814	3.6254	up	ANO2	anoctamin 2, calcium activated chloride channel	FALSE	Homo sapiens anoctamin 2, calcium activated chloride channel (ANO2), transcript variant 2, mRNA [NM_001278597]	57101	GO:0034220|GO:0046982|GO:0005886|GO:0034707|GO:0005229|GO:0031513|GO:0005654|GO:0055085|GO:0042803	5671939	chr12	5671880	-	hs|12p13.31	NM_001278597	chr12:5671939-5671880	NM_001278597	Hs.148970
A_21_P0003825	3.86766	1.95146	3.86766	up	lnc-CRIPAK-1	lnc-CRIPAK-1:7	FALSE	LNCipedia lincRNA (lnc-CRIPAK-1), lincRNA [lnc-CRIPAK-1:7]			1553517	chr4	1553384	+	hs|4p16.3		chr4:1553384-1553517
A_33_P3330663	4.36012	2.12437	4.36012	up			FALSE	immunoglobulin lambda variable 8/OR8-1 (pseudogene) [Source:HGNC Symbol;Acc:HGNC:5932] [ENST00000399730]			48114175	chr8	48114116	-	hs|8q11.21		chr8:48114175-48114116
A_21_P0008454	2.38344	1.25304	2.38344	up	lnc-MAP3K9-1	lnc-MAP3K9-1:1	FALSE	LNCipedia lincRNA (lnc-MAP3K9-1), lincRNA [lnc-MAP3K9-1:1]			71648302	chr14	71648243	-	hs|14q24.2		chr14:71648302-71648243
A_21_P0011258	2.91965	1.5458	2.91965	up	XLOC_l2_004315		FALSE	BROAD Institute lincRNA (XLOC_l2_004315), lincRNA [TCONS_l2_00007925]			103556344	chr14	103556285	+	hs|14q32.32		chr14:103556285-103556344
A_24_P631848	11.9502	3.57896	11.9502	up			FALSE				17200423	chr1	17200364	+	hs|1p36.13	BC036435	chr1:17200364-17200423		Hs.645945
A_24_P255384	3.87584	1.95451	3.87584	up			FALSE	RL31_HUMAN (P62899) 60S ribosomal protein L31, partial (97%) [THC2598564]			110802597	chr9	110802538	+	hs|9q31.2		chr9:110802538-110802597
A_19_P00322998	3.57972	1.83985	3.57972	up	LOC441204	uncharacterized LOC441204	FALSE	Homo sapiens uncharacterized LOC441204 (LOC441204), long non-coding RNA [NR_015364]	441204		26533559	chr7	26533500	+	hs|7p15.2	NR_015364	chr7:26533500-26533559	NR_015364	Hs.587432
A_33_P3342305	2.17742	1.12262	2.17742	up	ABCA8	ATP-binding cassette, sub-family A (ABC1), member 8	FALSE	Homo sapiens ATP-binding cassette, sub-family A (ABC1), member 8 (ABCA8), transcript variant 2, mRNA [NM_007168]	10351	GO:0005886|GO:0008152|GO:0006810|GO:0005743|GO:0042626|GO:0016021|GO:0055085|GO:0005524	66920902	chr17	66920843	-	hs|17q24.2	NM_007168	chr17:66920902-66920843	NM_007168	Hs.58351
A_33_P3282693	2.12657	1.08853	2.12657	up	OR3A4P	olfactory receptor, family 3, subfamily A, member 4 pseudogene	FALSE	Homo sapiens olfactory receptor, family 3, subfamily A, member 4 pseudogene (OR3A4P), non-coding RNA [NR_024128]	390756		3214651	chr17	3214592	+	hs|17p13.3	NR_024128	chr17:3214592-3214651	NR_024128	Hs.632245
A_32_P66364	2.42992	1.28091	2.42992	up	PPP1R1C	protein phosphatase 1, regulatory (inhibitor) subunit 1C	FALSE	Homo sapiens protein phosphatase 1, regulatory (inhibitor) subunit 1C (PPP1R1C), transcript variant 3, mRNA [NM_001080545]	151242	GO:0035556|GO:0007049|GO:0005737|GO:1900087|GO:0030307|GO:0004864|GO:0004865|GO:0006469|GO:0051301	182982191	chr2	182982132	+	hs|2q31.3	NM_001080545	chr2:182982132-182982191	NM_001080545	Hs.10941
A_23_P77310	2.01189	1.00855	2.01189	up	ZNF106	zinc finger protein 106	FALSE	Homo sapiens zinc finger protein 106 (ZNF106), transcript variant 1, mRNA [NM_022473]	64397	GO:0008286|GO:0017124|GO:0016020|GO:0001515|GO:0005730|GO:0046872|GO:0005829	42705253	chr15	42705194	-	hs|15q15.1	NM_022473	chr15:42705253-42705194	NM_022473	Hs.511143
A_33_P3370521	3.99598	1.99855	3.99598	up			FALSE				149429348	chr1	149429289	+	hs|1q21.2	AV727532	chr1:149429289-149429348		Hs.576457
A_21_P0000208	2.03051	1.02184	2.03051	up	SNORD22	small nucleolar RNA, C/D box 22	FALSE	Homo sapiens small nucleolar RNA, C/D box 22 (SNORD22), small nucleolar RNA [NR_000008]	9304		62620499	chr11	62620440	-	hs|11q12.3	NR_000008	chr11:62620499-62620440	NR_000008	Hs.744737
A_19_P00805367	2.9475	1.55949	2.9475	up	lnc-BCKDHB-1	lnc-BCKDHB-1:2	FALSE	LNCipedia lincRNA (lnc-BCKDHB-1), lincRNA [lnc-BCKDHB-1:2]			81152451	chr6	81152392	+	hs|6q14.1		chr6:81152392-81152451
A_21_P0000865	2.14381	1.10018	2.14381	up	LINC01016	long intergenic non-protein coding RNA 1016	FALSE	Homo sapiens long intergenic non-protein coding RNA 1016 (LINC01016), long non-coding RNA [NR_038989]	100507584		33857474	chr6	33857415	-	hs|6p21.31	NR_038989	chr6:33857474-33857415	NR_038989	Hs.547104
A_23_P216812	15.2275	3.9286	15.2275	up	CDKN2B	cyclin-dependent kinase inhibitor 2B (p15, inhibits CDK4)	FALSE	Homo sapiens cyclin-dependent kinase inhibitor 2B (p15, inhibits CDK4) (CDKN2B), transcript variant 1, mRNA [NM_004936]	1030	GO:0005515|GO:0031670|GO:0010467|GO:0014070|GO:0007093|GO:0006367|GO:0008285|GO:0071901|GO:0050680|GO:0005634|GO:0000079|GO:0048536|GO:0005829|GO:0005737|GO:0030858|GO:0045944|GO:0000086|GO:0031668|GO:0007050|GO:0007179|GO:0034097|GO:0030511|GO:0019901|GO:0007568|GO:2000134|GO:0006351|GO:0042326|GO:0001889|GO:0030219|GO:0004861|GO:0005654|GO:0000278	22009038	chr9	22008979	-	hs|9p21.3	NM_004936	chr9:22009038-22008979	NM_004936	Hs.72901
A_33_P3290162	3.00835	1.58897	3.00835	up	ASB18	ankyrin repeat and SOCS box containing 18	FALSE	Homo sapiens ankyrin repeat and SOCS box containing 18 (ASB18), mRNA [NM_212556]	401036	GO:0035556|GO:0016567	237103574	chr2	237103515	-	hs|2q37.2	NM_212556	chr2:237103574-237103515	NM_212556	Hs.639909
A_24_P255114	2.93143	1.5516	2.93143	up			FALSE	olfactory receptor, family 5, subfamily P, member 1 pseudogene [Source:HGNC Symbol;Acc:HGNC:14779] [ENST00000299512]			7794818	chr11	7794759	-	hs|11p15.4	AF220493	chr11:7794818-7794759		Hs.539057
A_33_P3353737	2.62961	1.39485	2.62961	up	ADH1B	alcohol dehydrogenase 1B (class I), beta polypeptide	FALSE	alcohol dehydrogenase 1B (class I), beta polypeptide [Source:HGNC Symbol;Acc:HGNC:250] [ENST00000305046]	125	GO:0006805|GO:0006069|GO:0004024|GO:0008270|GO:0044281|GO:0005829	100227587	chr4	100227528	-	hs|4q23	AF153821	chr4:100227587-100227528		Hs.4
A_33_P3333003	7.01408	2.81025	7.01408	up			FALSE				2583197	chr5	2583138	-	hs|5p15.33		chr5:002583197-002583138
A_33_P3396379	4.80141	2.26346	4.80141	up			FALSE				80277362	chr17	80277303	-	hs|17q25.3		chr17:080277362-080277303
A_23_P26294	2.26721	1.18092	2.26721	up	TPSG1	tryptase gamma 1	FALSE	Homo sapiens tryptase gamma 1 (TPSG1), mRNA [NM_012467]	25823	GO:0004252|GO:0005887|GO:0006508|GO:0008236	1271739	chr16	1271680	-	hs|16p13.3	NM_012467	chr16:1271739-1271680	NM_012467	Hs.592076
A_33_P3263867	2.12583	1.08803	2.12583	up	P2RX7	purinergic receptor P2X, ligand gated ion channel, 7	FALSE	Homo sapiens purinergic receptor P2X, ligand-gated ion channel, 7 (P2RX7), transcript variant 1, mRNA [NM_002562]	5027	GO:0005515|GO:0032755|GO:0006649|GO:0043132|GO:0031594|GO:0010524|GO:0034405|GO:0048705|GO:0006900|GO:0010043|GO:0042803|GO:0019228|GO:0006884|GO:0016485|GO:0031668|GO:0043025|GO:0032496|GO:0033198|GO:0001614|GO:0006509|GO:0043029|GO:0000287|GO:0030501|GO:0004931|GO:0005507|GO:0032060|GO:0001845|GO:0016079|GO:0046931|GO:0043234|GO:0032059|GO:0005887|GO:0045087|GO:0002028|GO:0032963|GO:0045121|GO:…	121623533	chr12	121623474	+	hs|12q24.31	NM_002562	chr12:121623474-121623533	NM_002562	Hs.729169
A_33_P3351836	2.34331	1.22855	2.34331	up	C2orf73	chromosome 2 open reading frame 73	FALSE	chromosome 2 open reading frame 73 [Source:HGNC Symbol;Acc:HGNC:26861] [ENST00000414747]	129852		54610331	chr2	54610272	+	hs|2p16.2		chr2:54610272-54610331
A_33_P3216621	2.38424	1.25353	2.38424	up			FALSE				54371228	chr16	54371169	+	hs|16q12.2		chr16:054371169-054371228
A_23_P364544	2.16923	1.11719	2.16923	up	C12orf60	chromosome 12 open reading frame 60	FALSE	Homo sapiens chromosome 12 open reading frame 60 (C12orf60), mRNA [NM_175874]	144608		14976572	chr12	14976513	+	hs|12p12.3	NM_175874	chr12:14976513-14976572	NM_175874	Hs.659951
A_24_P481824	3.44928	1.7863	3.44928	up	DPY19L4	dpy-19-like 4 (C. elegans)	FALSE	Homo sapiens dpy-19-like 4 (C. elegans) (DPY19L4), mRNA [NM_181787]	286148	GO:0000030|GO:0018406|GO:0005637|GO:0016021	95806038	chr8	95805979	+	hs|8q22.1	NM_181787	chr8:95805979-95806038	NM_181787	Hs.567828
A_33_P3219090	2.08974	1.06332	2.08974	up	INSIG1	insulin induced gene 1	FALSE	Homo sapiens insulin induced gene 1 (INSIG1), transcript variant 1, mRNA [NM_005542]	3638	GO:0005515|GO:0006695|GO:0042472|GO:0045599|GO:0005783|GO:0008283|GO:0045717|GO:0044281|GO:0010894|GO:0060363|GO:0032933|GO:0008152|GO:0032937|GO:0005789|GO:0060021|GO:0006641|GO:0042474	155101902	chr7	155101843	+	hs|7q36.3	NM_005542	chr7:155101843-155101902	NM_005542	Hs.520819
A_24_P783008	2.07027	1.04982	2.07027	up	LOC200726	hCG1657980	FALSE	Homo sapiens hCG1657980 (LOC200726), mRNA [NM_001102659]	200726		207513393	chr2	207509322	+	hs|2q33.3	NM_001102659	chr2:207509322-207513393	NM_001102659	Hs.144769
A_21_P0005219	3.42532	1.77624	3.42532	up	ZNRF2	zinc and ring finger 2, E3 ubiquitin protein ligase	FALSE	zinc and ring finger 2 [Source:HGNC Symbol;Acc:HGNC:22316] [ENST00000442800]	223082	GO:0042734|GO:0005737|GO:0030054|GO:0016567|GO:0005886|GO:0016874|GO:0008270|GO:0005765|GO:0030659|GO:0010008	30451570	chr7	30405910	+	hs|7p14.3		chr7:30405910-30451570		Hs.741107
A_33_P3235880	8.19973	3.03558	8.19973	up	TBC1D28	TBC1 domain family, member 28	FALSE	Homo sapiens TBC1 domain family, member 28 (TBC1D28), mRNA [NM_001039397]	254272	GO:0032851|GO:0005097	18538901	chr17	18538842	-	hs|17p11.2	NM_001039397	chr17:18538901-18538842	NM_001039397	Hs.434123
A_33_P3366241	2.26187	1.17751	2.26187	up	SCARA5	scavenger receptor class A, member 5	FALSE	scavenger receptor class A, member 5 [Source:HGNC Symbol;Acc:HGNC:28701] [ENST00000518030]	286133	GO:0034605|GO:0010468|GO:0006879|GO:0070207|GO:0030193|GO:0009986|GO:0005887|GO:0006898|GO:0070287|GO:0034755|GO:0006897|GO:0005044	27762304	chr8	27762245	-	hs|8p21.1	AY337579	chr8:27762304-27762245		Hs.591833
A_32_P170621	2.87099	1.52155	2.87099	up	CASC2	cancer susceptibility candidate 2 (non-protein coding)	FALSE	Homo sapiens cancer susceptibility candidate 2 (non-protein coding) (CASC2), transcript variant 3, long non-coding RNA [NR_026941]	255082		119809119	chr10	119809060	+	hs|10q26.11	NR_026941	chr10:119809060-119809119	NR_026941	Hs.89387
A_23_P51019	2.40039	1.26327	2.40039	up	SCN2A	sodium channel, voltage gated, type II alpha subunit	FALSE	Homo sapiens sodium channel, voltage gated, type II alpha subunit (SCN2A), transcript variant 1, mRNA [NM_021007]	6326	GO:0030424|GO:0086010|GO:0005886|GO:0042552|GO:0005248|GO:0031226|GO:0034706|GO:0030315|GO:0033270|GO:0051402|GO:0019228|GO:0033268|GO:0014704|GO:0005887|GO:0035725|GO:0034765|GO:0001518|GO:0006814|GO:0008627	166246166	chr2	166246107	+	hs|2q24.3	NM_021007	chr2:166246107-166246166	NM_021007	Hs.93485
A_33_P3225760	2.01355	1.00974	2.01355	up	PCDH18	protocadherin 18	FALSE	Homo sapiens protocadherin 18 (PCDH18), transcript variant 2, mRNA [NM_001300828]	54510	GO:0005886|GO:0007420|GO:0005509|GO:0016021|GO:0007156	138453085	chr4	138453026	-	hs|4q28.3	NM_001300828	chr4:138453085-138453026	NM_001300828	Hs.591691
A_33_P3346680	2.37057	1.24524	2.37057	up			FALSE	GB			28711589	chr16	28711530	-	hs|16p11.2		chr16:028711589-028711530
A_33_P3363186	2.08812	1.06221	2.08812	up			FALSE	Q6IMN1_HUMAN (Q6IMN1) Growth arrest-specific 6, partial (6%) [THC2779442]			114540999	chr13	114540940	+	hs|13q34		chr13:114540940-114540999
A_33_P3228609	2.0435	1.03104	2.0435	up	LINC01123	long intergenic non-protein coding RNA 1123	FALSE	Homo sapiens long intergenic non-protein coding RNA 1123 (LINC01123), transcript variant 1, long non-coding RNA [NR_046110]	440894		110752062	chr2	110752003	+	hs|2q13	NR_046110	chr2:110752003-110752062	NR_046110	Hs.516403
A_21_P0002766	2.12124	1.08491	2.12124	up			FALSE	PREDICTED: Homo sapiens uncharacterized LOC644662 (LOC644662), ncRNA [XR_171034]			126010122	chr3	126010063	+	hs|3q21.3	XR_171034	chr3:126010063-126010122	XR_171034	Hs.518222
A_21_P0012891	2.07839	1.05547	2.07839	up	LOC729506	uncharacterized LOC729506	FALSE	Homo sapiens uncharacterized LOC729506 (LOC729506), long non-coding RNA [NR_039984]	729506		8457564	chr5	8452337	-	hs|5p15.31	NR_039984	chr5:8457564-8452337	NR_039984	Hs.566412
A_21_P0014607	4.3353	2.11613	4.3353	up			FALSE				40839876	chr1	40839817	-	hs|1p34.2		chr1:040839876-040839817
A_23_P160559	2.02374	1.01703	2.02374	up	ECM1	extracellular matrix protein 1	FALSE	Homo sapiens extracellular matrix protein 1 (ECM1), transcript variant 1, mRNA [NM_004425]	1893	GO:0005515|GO:0005134|GO:0010466|GO:0002020|GO:0005615|GO:0006954|GO:0001960|GO:0002828|GO:0004871|GO:0043123|GO:0070062|GO:2000404|GO:0006357|GO:0005578|GO:0001525|GO:0008022|GO:0030502|GO:0031214|GO:0045766|GO:0031012|GO:0007165|GO:0001938|GO:0001503|GO:0043236|GO:0019899	150485856	chr1	150485797	+	hs|1q21.3	NM_004425	chr1:150485797-150485856	NM_004425	Hs.81071
A_23_P15450	2.19102	1.1316	2.19102	up	TMEM100	transmembrane protein 100	FALSE	Homo sapiens transmembrane protein 100 (TMEM100), transcript variant 2, mRNA [NM_018286]	55273	GO:0071773|GO:0048471|GO:2001214|GO:0005886|GO:0005783|GO:0060842|GO:0001525|GO:0030509|GO:0001701|GO:0003674|GO:0007219|GO:0043491|GO:0043204|GO:0016021|GO:0001570|GO:0045603	53797818	chr17	53797759	-	hs|17q22	NM_018286	chr17:53797818-53797759	NM_018286	Hs.173233
A_21_P0005498	5.32572	2.41298	5.32572	up	lnc-RP4-725G10.1.1-4	lnc-RP4-725G10.1.1-4:1	FALSE	LNCipedia lincRNA (lnc-RP4-725G10.1.1-4), lincRNA [lnc-RP4-725G10.1.1-4:1]			56594711	chr7	56594652	-	hs|7p11.2		chr7:56594711-56594652
A_21_P0001696	2.71582	1.44139	2.71582	up	lnc-S1PR1-2	lnc-S1PR1-2:3	FALSE	LNCipedia lincRNA (lnc-S1PR1-2), lincRNA [lnc-S1PR1-2:3]			101630455	chr1	101630396	+	hs|1p21.2		chr1:101630396-101630455
A_21_P0005782	5.23618	2.38851	5.23618	up	lnc-ERICH1-2	lnc-ERICH1-2:5	FALSE	LNCipedia lincRNA (lnc-ERICH1-2), lincRNA [lnc-ERICH1-2:5]			1236462	chr8	1236403	-	hs|8p23.3		chr8:1236462-1236403
A_21_P0008835	3.59218	1.84486	3.59218	up	lnc-HMG20A-5	lnc-HMG20A-5:1	FALSE	LNCipedia lincRNA (lnc-HMG20A-5), lincRNA [lnc-HMG20A-5:1]			77992117	chr15	77992058	+	hs|15q24.3		chr15:77992058-77992117
A_33_P3314810	3.9398	1.97812	3.9398	up			FALSE	capicua transcriptional repressor pseudogene 5 [Source:HGNC Symbol;Acc:HGNC:37754] [ENST00000424045]			658920	chr1	658861	+	hs|1p36.33		chr1:658861-658920
A_33_P3321682	3.53056	1.8199	3.53056	up			FALSE				236673342	chr2	236673283	-	hs|2q37.2		chr2:236673342-236673283
A_19_P00318443	2.00047	1.00034	2.00047	up	lnc-MAGI2-1	lnc-MAGI2-1:2	FALSE	LNCipedia lincRNA (lnc-MAGI2-1), lincRNA [lnc-MAGI2-1:2]			79088911	chr7	79088852	-	hs|7q21.11		chr7:79088911-79088852
A_21_P0003793	2.1612	1.11183	2.1612	up	lnc-C4orf27-1	lnc-C4orf27-1:1	FALSE	LNCipedia lincRNA (lnc-C4orf27-1), lincRNA [lnc-C4orf27-1:1]			170782617	chr4	170770488	-	hs|4q33		chr4:170782617-170770488
A_33_P3378360	2.03244	1.02321	2.03244	up	PRELID1	PRELI domain containing 1	FALSE	Homo sapiens PRELI domain containing 1 (PRELID1), transcript variant 1, mRNA [NM_013237]	27166	GO:0005515|GO:0043066|GO:0051881|GO:0006915|GO:0097035|GO:0070234|GO:0007275|GO:0005739|GO:0005758|GO:0043234|GO:0006955|GO:0010917|GO:0090201|GO:0015914|GO:0010950|GO:0045580|GO:0005654|GO:2001140	176733664	chr5	176733605	+	hs|5q35.3	NM_013237	chr5:176733605-176733664	NM_013237	Hs.744904
A_32_P52330	2.29244	1.19689	2.29244	up	LOC113230	uncharacterized protein LOC113230	FALSE	Homo sapiens uncharacterized protein LOC113230 (LOC113230), transcript variant 1, mRNA [NM_001291291]	113230		14185723	chr19	14185664	+	hs|19p13.12	NM_001291291	chr19:14185664-14185723	NM_001291291	Hs.372775
A_33_P3342295	4.58429	2.1967	4.58429	up	VSX1	visual system homeobox 1	FALSE	Homo sapiens visual system homeobox 1 (VSX1), transcript variant 2, mRNA [NM_199425]	30813	GO:0043565|GO:0006355|GO:0003700|GO:0060040|GO:0042551|GO:0005634|GO:0005575|GO:0007601|GO:0050896|GO:0006351	25062369	chr20	25062310	-	hs|20p11.21	NM_199425	chr20:25062369-25062310	NM_199425	Hs.274264
A_32_P191262	3.8612	1.94905	3.8612	up	ACR	acrosin	FALSE	Homo sapiens acrosin (ACR), mRNA [NM_001097]	49	GO:0005515|GO:0043159|GO:0004252|GO:0005507|GO:0005798|GO:0005576|GO:0005634|GO:0042806|GO:0048545|GO:0007339|GO:0003677|GO:0005537|GO:0007338|GO:0043234|GO:0004040|GO:0007190|GO:0002077|GO:0008144|GO:0008270|GO:0007341|GO:0007340|GO:0032504	51183664	chr22	51183605	+	hs|22q13.33	NM_001097	chr22:51183605-51183664	NM_001097	Hs.370870
A_21_P0010338	3.17924	1.66868	3.17924	up			FALSE	ALU1_HUMAN (P39188) Alu subfamily J sequence contamination warning entry, partial (18%) [THC2773672]			16062950	chr22	16062891	+	hs|22q11.1		chr22:16062891-16062950
A_21_P0012372	4.03069	2.01103	4.03069	up	LINC00693	long intergenic non-protein coding RNA 693	FALSE	Homo sapiens long intergenic non-protein coding RNA 693 (LINC00693), long non-coding RNA [NR_038840]	645206		28798327	chr3	28798268	+	hs|3p24.1		chr3:28798268-28798327	NR_038840	Hs.388256
A_33_P3375809	2.32651	1.21817	2.32651	up	LOC729970	hCG2028352-like	FALSE	Homo sapiens hCG2028352-like (LOC729970), long non-coding RNA [NR_033998]	729970		95428810	chr1	95428751	+	hs|1p21.3	NR_033998	chr1:95428751-95428810	NR_033998	Hs.297988
A_21_P0002256	2.11496	1.08063	2.11496	up	lnc-THNSL2-1	lnc-THNSL2-1:2	FALSE	LNCipedia lincRNA (lnc-THNSL2-1), lincRNA [lnc-THNSL2-1:2]			88584638	chr2	88584579	+	hs|2p11.2		chr2:88584579-88584638
A_21_P0007908	2.45418	1.29524	2.45418	up	LINC00327	long intergenic non-protein coding RNA 327	FALSE	Homo sapiens long intergenic non-protein coding RNA 327 (LINC00327), long non-coding RNA [NR_038995]	100506697		24061159	chr13	24061100	+	hs|13q12.12	NR_038995	chr13:24061100-24061159	NR_038995	Hs.50118
A_23_P67127	2.50172	1.32292	2.50172	up	TMEM145	transmembrane protein 145	FALSE	Homo sapiens transmembrane protein 145 (TMEM145), mRNA [NM_173633]	284339	GO:0007186|GO:0016021|GO:0019236	42829200	chr19	42829141	+	hs|19q13.2	NM_173633	chr19:42829141-42829200	NM_173633	Hs.382075
A_33_P3382769	2.22674	1.15493	2.22674	up			FALSE	ubiquitin-conjugating enzyme E2Q family member 2 pseudogene 2 [Source:HGNC Symbol;Acc:HGNC:37440] [ENST00000561287]			82707932	chr15	82707873	+	hs|15q25.2	NR_024474	chr15:82707873-82707932		Hs.745450
A_21_P0000691	2.06323	1.0449	2.06323	up	LOC115110	uncharacterized LOC115110	FALSE	Homo sapiens uncharacterized LOC115110 (LOC115110), long non-coding RNA [NR_037844]	115110		2487585	chr1	2487526	-	hs|1p36.32	NR_037844	chr1:2487585-2487526	NR_037844	Hs.602652
A_21_P0003242	2.39541	1.26027	2.39541	up	lnc-EPHA6-1	lnc-EPHA6-1:1	FALSE	LNCipedia lincRNA (lnc-EPHA6-1), lincRNA [lnc-EPHA6-1:1]			96336350	chr3	96336291	+	hs|3q11.2		chr3:96336291-96336350
A_21_P0005320	2.35451	1.23542	2.35451	up	lnc-EPHB4-1	lnc-EPHB4-1:1	FALSE	LNCipedia lincRNA (lnc-EPHB4-1), lincRNA [lnc-EPHB4-1:1]			100434995	chr7	100434936	-	hs|7q22.1		chr7:100434995-100434936
A_21_P0008478	2.13165	1.09197	2.13165	up	lnc-SERPINA12-1	lnc-SERPINA12-1:1	FALSE	LNCipedia lincRNA (lnc-SERPINA12-1), lincRNA [lnc-SERPINA12-1:1]			95024849	chr14	95024790	-	hs|14q32.13		chr14:95024849-95024790
A_33_P3322859	5.07147	2.3424	5.07147	up	HES6	hes family bHLH transcription factor 6	FALSE	Homo sapiens hes family bHLH transcription factor 6 (HES6), transcript variant 1, mRNA [NM_018645]	55502	GO:0003712|GO:0005667|GO:0006355|GO:0003700|GO:0006357|GO:0046983|GO:0005634|GO:0003677|GO:0030154|GO:0006351|GO:0008134|GO:0007399	239147315	chr2	239147256	-	hs|2q37.3	NM_018645	chr2:239147315-239147256	NM_018645	Hs.42949
A_21_P0000659	2.01463	1.01051	2.01463	up	UBAC2-AS1	UBAC2 antisense RNA 1	FALSE	Homo sapiens UBAC2 antisense RNA 1 (UBAC2-AS1), transcript variant 1, long non-coding RNA [NR_036531]	100289373		99848687	chr13	99848628	-	hs|13q32.3	NR_036531	chr13:99848687-99848628	NR_036531	Hs.225914
A_33_P3368830	2.20134	1.13838	2.20134	up	LY9	lymphocyte antigen 9	FALSE	Homo sapiens lymphocyte antigen 9 (LY9), transcript variant 2, mRNA [NM_001033667]	4063	GO:0003674|GO:0004872|GO:0016021|GO:0007155	160772481	chr1	160772422	+	hs|1q23.3	NM_001033667	chr1:160772422-160772481	NM_001033667	Hs.403857
A_21_P0006242	2.01576	1.01132	2.01576	up	lnc-PPP1R26-2	lnc-PPP1R26-2:1	FALSE	LNCipedia lincRNA (lnc-PPP1R26-2), lincRNA [lnc-PPP1R26-2:1]			138307163	chr9	138307104	+	hs|9q34.3		chr9:138307104-138307163
A_33_P3245348	3.01849	1.59383	3.01849	up	KRTAP4-1	keratin associated protein 4-1	FALSE	Homo sapiens keratin associated protein 4-1 (KRTAP4-1), mRNA [NM_033060]	85285	GO:0045095	39341099	chr17	39341040	-	hs|17q21.2	NM_033060	chr17:39341099-39341040	NM_033060	Hs.437079
A_19_P00320622	14.0814	3.81572	14.0814	up	MIATNB	MIAT neighbor (non-protein coding)	FALSE	Homo sapiens MIAT neighbor (non-protein coding) (MIATNB), long non-coding RNA [NR_110543]	102724827		27170179	chr22	27170120	+	hs|22q12.1	NR_110543	chr22:27170120-27170179	NR_110543
A_24_P247536	2.0618	1.0439	2.0618	up	FAM133B	family with sequence similarity 133, member B	FALSE	Homo sapiens family with sequence similarity 133, member B (FAM133B), transcript variant 2, mRNA [NM_001040057]	257415		92208653	chr7	92207671	-	hs|7q21.2	NM_001040057	chr7:92208653-92207671	NM_001040057	Hs.489105
A_23_P330419	3.69298	1.88479	3.69298	up	ACPT	acid phosphatase, testicular	FALSE	Homo sapiens acid phosphatase, testicular (ACPT), mRNA [NM_033068]	93650	GO:0016311|GO:0003993|GO:0016021	51298087	chr19	51297824	+	hs|19q13.33	NM_033068	chr19:51297824-51298087	NM_033068	Hs.293394
A_21_P0000121	4.27518	2.09599	4.27518	up	C19orf81	chromosome 19 open reading frame 81	FALSE	Homo sapiens chromosome 19 open reading frame 81 (C19orf81), mRNA [NM_001195076]	342918		51162567	chr19	51162508	+	hs|19q13.33	NM_001195076	chr19:51162508-51162567	NM_001195076	Hs.531650
A_23_P212655	9.85984	3.30156	9.85984	up	KLHL6	kelch-like family member 6	FALSE	Homo sapiens kelch-like family member 6 (KLHL6), mRNA [NM_130446]	89857	GO:0050853|GO:0002467	183205899	chr3	183205840	-	hs|3q27.1	NM_130446	chr3:183205899-183205840	NM_130446	Hs.659147
A_21_P0014435	2.66656	1.41498	2.66656	up	LOC100287728	uncharacterized LOC100287728	FALSE	Homo sapiens uncharacterized LOC100287728 (LOC100287728), long non-coding RNA [NR_103770]	100287728		134257529	chrX	134257470	+	hs|Xq26.3	NR_103770	chrX:134257470-134257529	NR_103770	Hs.371717
A_33_P3292287	2.12392	1.08673	2.12392	up	KIAA0087	KIAA0087	FALSE	Homo sapiens KIAA0087 (KIAA0087), long non-coding RNA [NR_022006]	9808		26575881	chr7	26575822	-	hs|7p15.2	NR_022006	chr7:26575881-26575822	NR_022006	Hs.69749
A_23_P314798	2.23267	1.15877	2.23267	up	DCST2	DC-STAMP domain containing 2	FALSE	Homo sapiens DC-STAMP domain containing 2 (DCST2), mRNA [NM_144622]	127579	GO:0016021	154999101	chr1	154999042	-	hs|1q21.3	NM_144622	chr1:154999101-154999042	NM_144622	Hs.591491
A_33_P3268686	2.641	1.40108	2.641	up	FBXW12	F-box and WD repeat domain containing 12	FALSE	Homo sapiens F-box and WD repeat domain containing 12 (FBXW12), transcript variant 1, mRNA [NM_207102]	285231		48419905	chr3	48419846	+	hs|3p21.31	NM_207102	chr3:48419846-48419905	NM_207102	Hs.288793
A_33_P3211078	19.268	4.26814	19.268	up	HMGA2	high mobility group AT-hook 2	FALSE	Homo sapiens high mobility group AT-hook 2 (HMGA2), transcript variant 3, mRNA [NM_001300918]	8091	GO:0005515|GO:0003906|GO:0030261|GO:0004677|GO:0006325|GO:0046332|GO:0035985|GO:0010564|GO:0035986|GO:0035987|GO:0035988|GO:0071158|GO:0000989|GO:0032993|GO:0002062|GO:0045444|GO:0000975|GO:0008301|GO:0071141|GO:0031492|GO:0007275|GO:0001047|GO:0000122|GO:2000036|GO:0043392|GO:0043922|GO:0003131|GO:0006284|GO:0070742|GO:0005654|GO:0045893|GO:0045892|GO:0000737|GO:0040008|GO:0051301|GO:0008134|GO:…	66219160	chr12	66219101	+	hs|12q14.3	NM_001300918	chr12:66219101-66219160	NM_001300918	Hs.505924
A_33_P3365963	5.92693	2.56728	5.92693	up			FALSE				41363168	chr4	41363109	-	hs|4p13		chr4:041363168-041363109
A_33_P3318668	2.028	1.02006	2.028	up	CYSRT1	cysteine-rich tail protein 1	FALSE	Homo sapiens cysteine-rich tail protein 1 (CYSRT1), mRNA [NM_199001]	375791	GO:0070062	140120762	chr9	140120703	+	hs|9q34.3	NM_199001	chr9:140120703-140120762	NM_199001	Hs.512469
A_33_P3322460	2.24866	1.16907	2.24866	up			FALSE				76808962	chr18	76808903	+	hs|18q23		chr18:076808903-076808962
A_33_P3296567	2.20681	1.14196	2.20681	up	PRRC2B	proline-rich coiled-coil 2B	FALSE	Homo sapiens proline-rich coiled-coil 2B (PRRC2B), mRNA [NM_013318]	84726	GO:0005515	134346175	chr9	134343084	+	hs|9q34.13	NM_013318	chr9:134343084-134346175	NM_013318	Hs.743955
A_33_P3878964	2.13502	1.09425	2.13502	up	NAA25	N(alpha)-acetyltransferase 25, NatB auxiliary subunit	FALSE	Homo sapiens N(alpha)-acetyltransferase 25, NatB auxiliary subunit (NAA25), mRNA [NM_024953]	80018	GO:0005737|GO:0005794|GO:0005654	112465702	chr12	112465643	-	hs|12q24.13	NM_024953	chr12:112465702-112465643	NM_024953	Hs.530941
A_24_P150486	2.12451	1.08713	2.12451	up	SPTLC2	serine palmitoyltransferase, long chain base subunit 2	FALSE	Homo sapiens serine palmitoyltransferase, long chain base subunit 2 (SPTLC2), mRNA [NM_004863]	9517	GO:0006665|GO:0004758|GO:0006686|GO:0030148|GO:0044281|GO:0005739|GO:0030170|GO:0005789|GO:0016021|GO:0017059|GO:0046513|GO:0046512|GO:0046511	77974051	chr14	77973992	-	hs|14q24.3	NM_004863	chr14:77974051-77973992	NM_004863	Hs.435661
A_21_P0010504	2.4529	1.29449	2.4529	up	HOTAIR	HOX transcript antisense RNA	FALSE	Homo sapiens HOX transcript antisense RNA (HOTAIR), transcript variant 3, long non-coding RNA [NR_047518]	100124700		54362652	chr12	54362593	-	hs|12q13.13		chr12:54362652-54362593	NR_047518	Hs.197076
A_19_P00318029	2.00741	1.00533	2.00741	up			FALSE				137445743	chr9	137445684	+	hs|9q34.3		chr9:137445684-137445743
A_33_P3230219	2.06676	1.04737	2.06676	up	TMEM54	transmembrane protein 54	FALSE	Homo sapiens transmembrane protein 54 (TMEM54), mRNA [NM_033504]	113452	GO:0008150|GO:0003674|GO:0016021|GO:0005575	33360256	chr1	33360197	-	hs|1p35.1	NM_033504	chr1:33360256-33360197	NM_033504	Hs.534521
A_33_P3276813	2.20845	1.14303	2.20845	up	EYS	eyes shut homolog (Drosophila)	FALSE	Homo sapiens eyes shut homolog (Drosophila) (EYS), transcript variant 1, mRNA [NM_001142800]	346007	GO:0003674|GO:0050908|GO:0005509|GO:0043403|GO:0070062	65596650	chr6	65596591	-	hs|6q12	NM_001142800	chr6:65596650-65596591	NM_001142800	Hs.25067
A_24_P365901	2.18462	1.12738	2.18462	up	TSPAN33	tetraspanin 33	FALSE	Homo sapiens tetraspanin 33 (TSPAN33), mRNA [NM_178562]	340348	GO:0051604|GO:0009986|GO:0005886|GO:0097197|GO:0016021|GO:0019899|GO:0090002	128808301	chr7	128808242	+	hs|7q32.1	NM_178562	chr7:128808242-128808301	NM_178562	Hs.27267
A_23_P35256	44.0566	5.46128	44.0566	up			FALSE	polymerase (RNA) III (DNA directed) polypeptide C (62kD) [Source:HGNC Symbol;Acc:HGNC:30076] [ENST00000334163]			145594972	chr1	145594157	-	hs|1q21.1	XM_005272927	chr1:145594972-145594157	XM_005272927	Hs.591457
A_33_P3479999	2.18477	1.12748	2.18477	up	LOC494150	prohibitin pseudogene	FALSE	Homo sapiens prohibitin pseudogene, mRNA (cDNA clone IMAGE:4547239). [BC014228]	494150		51517952	chr12	51517893	-	hs|12q13.13	BC014228	chr12:51517952-51517893		Hs.662179
A_33_P3382118	2.09924	1.06987	2.09924	up			FALSE				80533168	chr17	80533109	-	hs|17q25.3		chr17:080533168-080533109
A_33_P3226070	2.59508	1.37578	2.59508	up	lnc-CRIPAK-1	lnc-CRIPAK-1:1	FALSE	LNCipedia lincRNA (lnc-CRIPAK-1), lincRNA [lnc-CRIPAK-1:1]			1548955	chr4	1548896	+	hs|4p16.3	XM_006713937	chr4:1548896-1548955	XM_006713937
A_19_P00809030	6.33593	2.66356	6.33593	up	LOC101929378	uncharacterized LOC101929378	FALSE	Homo sapiens uncharacterized LOC101929378 (LOC101929378), transcript variant 1, long non-coding RNA [NR_110250]	101929378		156877569	chr2	156877510	-	hs|2q24.1	NR_110250	chr2:156877569-156877510	NR_110250	Hs.171192
A_21_P0012298	2.48308	1.31213	2.48308	up	XLOC_l2_009539		FALSE	BROAD Institute lincRNA (XLOC_l2_009539), lincRNA [TCONS_l2_00018033]			35590675	chr22	35590616	-	hs|22q12.3		chr22:35590675-35590616
A_21_P0003886	2.09444	1.06656	2.09444	up	LOC101928237	uncharacterized LOC101928237	FALSE	PREDICTED: Homo sapiens uncharacterized LOC101928237 (LOC101928237), transcript variant X1, ncRNA [XR_241657]	101928237		4576914	chr4	4576855	-	hs|4p16.2	XR_241657	chr4:4576914-4576855	XR_241657
A_23_P388220	3.04525	1.60656	3.04525	up	RALYL	RALY RNA binding protein-like	FALSE	Homo sapiens RALY RNA binding protein-like (RALYL), transcript variant 3, mRNA [NM_173848]	138046	GO:0000166	85833142	chr8	85799966	+	hs|8q21.2	NM_173848	chr8:85799966-85833142	NM_173848	Hs.121663
A_33_P3423420	3.47713	1.7979	3.47713	up	ZNF750	zinc finger protein 750	FALSE	Homo sapiens zinc finger protein 750 (ZNF750), mRNA [NM_024702]	79755	GO:0001077|GO:0008544|GO:0045944|GO:0005730|GO:0005634|GO:0001046|GO:0046872|GO:0030154|GO:0006351|GO:0043231	80787421	chr17	80787362	-	hs|17q25.3	NM_024702	chr17:80787421-80787362	NM_024702	Hs.653124
A_21_P0013599	2.25294	1.17181	2.25294	up	LOC101929331	uncharacterized LOC101929331	FALSE	Homo sapiens uncharacterized LOC101929331 (LOC101929331), long non-coding RNA [NR_121587]	101929331		132045213	chr9	132044917	+	hs|9q34.11	NR_121587	chr9:132044917-132045213	NR_121587	Hs.522428
A_33_P3228931	2.40263	1.26462	2.40263	up	CASS4	Cas scaffolding protein family member 4	FALSE	Homo sapiens Cas scaffolding protein family member 4 (CASS4), transcript variant 4, mRNA [NM_001164115]	57091	GO:0023014|GO:0005737|GO:0000160|GO:0016020|GO:0007155|GO:0005856|GO:0005925|GO:0000155	55025730	chr20	55025671	+	hs|20q13.31	NM_001164115	chr20:55025671-55025730	NM_001164115	Hs.473144
A_33_P3350202	2.70664	1.43651	2.70664	up	MOCS3	molybdenum cofactor synthesis 3	FALSE	Homo sapiens molybdenum cofactor synthesis 3 (MOCS3), mRNA [NM_014484]	27304	GO:0005515|GO:0002143|GO:0016779|GO:0034227|GO:0006767|GO:0032447|GO:0044281|GO:0005524|GO:0046872|GO:0005829|GO:0032324|GO:0002098|GO:0016783|GO:0018192|GO:0006766|GO:0018117|GO:0006777|GO:0004792|GO:0042292|GO:0070733	49577787	chr20	49577728	+	hs|20q13.13	NM_014484	chr20:49577728-49577787	NM_014484	Hs.159410
A_33_P3390349	2.49663	1.31998	2.49663	up	VAV2	vav 2 guanine nucleotide exchange factor	FALSE	Homo sapiens cDNA FLJ42277 fis, clone TLIVE2002338. [AK124271]	7410	GO:0010468|GO:0005515|GO:0005154|GO:0005886|GO:0007264|GO:0030032|GO:0046872|GO:0005829|GO:0005085|GO:0043552|GO:0007411|GO:0005089|GO:0051056|GO:0048010|GO:0048011|GO:0043065|GO:0048013|GO:0030168|GO:0001525|GO:0097190|GO:0007165|GO:0016477|GO:0030193|GO:0007596|GO:0032321|GO:0045087|GO:0038096|GO:0038095	136655250	chr9	136655191	+	hs|9q34.2	AK124271	chr9:136655191-136655250
A_33_P3278649	5.20452	2.37976	5.20452	up	ENTPD2	ectonucleoside triphosphate diphosphohydrolase 2	FALSE	Homo sapiens ectonucleoside triphosphate diphosphohydrolase 2 (ENTPD2), transcript variant 1, mRNA [NM_203468]	954	GO:0017111|GO:0017110|GO:0007186|GO:0005886|GO:0009181|GO:0005789|GO:0005605|GO:0030168|GO:0016021|GO:0005524|GO:0070062	139942612	chr9	139942553	-	hs|9q34.3	NM_203468	chr9:139942612-139942553	NM_203468	Hs.123036
A_21_P0008121	2.40252	1.26455	2.40252	up	lnc-SOX1-4	lnc-SOX1-4:1	FALSE	LNCipedia lincRNA (lnc-SOX1-4), lincRNA [lnc-SOX1-4:1]			112548659	chr13	112548600	+	hs|13q34		chr13:112548600-112548659
A_33_P3409974	21.4674	4.42408	21.4674	up	THRB	thyroid hormone receptor, beta	FALSE	Homo sapiens thyroid hormone receptor, beta (THRB), transcript variant 4, mRNA [NM_001252634]	7068	GO:0005515|GO:0010467|GO:0000790|GO:0006367|GO:0003700|GO:0007605|GO:0008016|GO:0003707|GO:0005634|GO:0070324|GO:0060509|GO:0008050|GO:0045944|GO:0043401|GO:0009887|GO:0070062|GO:0003714|GO:0000122|GO:0003677|GO:0006351|GO:0031490|GO:0043565|GO:0005654|GO:0008270|GO:0007621|GO:0004887|GO:0019899|GO:0030522	24158704	chr3	24158645	-	hs|3p24.2	NM_001252634	chr3:24158704-24158645	NM_001252634	Hs.187861
A_33_P3366667	2.21489	1.14723	2.21489	up	EYA1	EYA transcriptional coactivator and phosphatase 1	FALSE	Homo sapiens EYA transcriptional coactivator and phosphatase 1 (EYA1), transcript variant EYA1C, mRNA [NM_000503]	2138	GO:0005515|GO:0001656|GO:0007389|GO:0001658|GO:0007605|GO:0003723|GO:0000132|GO:0035088|GO:0048704|GO:0005634|GO:0048752|GO:0045739|GO:0009653|GO:0046872|GO:0035335|GO:0006302|GO:0005737|GO:0045944|GO:0010212|GO:2001240|GO:0090103|GO:0072513|GO:0014706|GO:0042474|GO:0042473|GO:0004725|GO:0050679|GO:0045747|GO:0016576|GO:0016925|GO:0035909|GO:0048665|GO:0071600|GO:0006351|GO:0003151|GO:0060037|GO:…	72110532	chr8	72110473	-	hs|8q13.3	NM_000503	chr8:72110532-72110473	NM_000503	Hs.491997
A_24_P415624	2.07682	1.05438	2.07682	up	MLXIP	MLX interacting protein	FALSE	Homo sapiens MLX interacting protein (MLXIP), mRNA [NM_014938]	22877	GO:0003700|GO:0006357|GO:0046983|GO:1900402|GO:0005741|GO:0005634|GO:0003677|GO:0006351|GO:0006913	122618513	chr12	122618454	+	hs|12q24.31	NM_014938	chr12:122618454-122618513	NM_014938	Hs.721711
A_33_P3405189	3.60872	1.85149	3.60872	up			FALSE				161416579	chr1	161416520	-	hs|1q23.3		chr1:161416579-161416520
A_23_P96383	2.07651	1.05416	2.07651	up	SRPX	sushi-repeat containing protein, X-linked	FALSE	Homo sapiens sushi-repeat containing protein, X-linked (SRPX), transcript variant 1, mRNA [NM_006307]	8406	GO:0034976|GO:0005776|GO:0016020|GO:0009986|GO:0005783|GO:0060244|GO:0006914|GO:2001241|GO:0001845|GO:0007155	38008772	chrX	38008713	-	hs|Xp11.4	NM_006307	chrX:38008772-38008713	NM_006307	Hs.15154
A_21_P0004562	3.19839	1.67735	3.19839	up	lnc-ANKRA2-3	lnc-ANKRA2-3:2	FALSE	LNCipedia lincRNA (lnc-ANKRA2-3), lincRNA [lnc-ANKRA2-3:2]			72542396	chr5	72542337	-	hs|5q13.2		chr5:72542396-72542337
A_33_P3318646	2.62561	1.39265	2.62561	up	CALY	calcyon neuron-specific vesicular protein	FALSE	Homo sapiens calcyon neuron-specific vesicular protein (CALY), mRNA [NM_015722]	50632	GO:0045807|GO:0032051|GO:0005887|GO:0031410|GO:0007212|GO:0032403|GO:0030659|GO:0048268|GO:0006897	135138991	chr10	135138932	-	hs|10q26.3	NM_015722	chr10:135138991-135138932	NM_015722	Hs.148680
A_24_P251599	2.02098	1.01506	2.02098	up	CAV3	caveolin 3	FALSE	Homo sapiens caveolin 3 (CAV3), transcript variant 2, mRNA [NM_001234]	859	GO:0005515|GO:0030018|GO:0031594|GO:0008016|GO:0010831|GO:0051394|GO:0031122|GO:0060307|GO:0032403|GO:0030154|GO:0070836|GO:0060373|GO:0016010|GO:0051926|GO:0017015|GO:0071253|GO:0086005|GO:0051647|GO:0042632|GO:0009986|GO:0060762|GO:0007520|GO:0033292|GO:0044325|GO:0006897|GO:0060347|GO:0045792|GO:0061052|GO:0007517|GO:0051001|GO:0002027|GO:0055117|GO:0006641|GO:0016049|GO:0055013|GO:0045121|GO:…	8787475	chr3	8787416	+	hs|3p25.3	NM_001234	chr3:8787416-8787475	NM_001234	Hs.98303
A_24_P202139	2.00268	1.00194	2.00268	up	METTL9	methyltransferase like 9	FALSE	Homo sapiens methyltransferase like 9 (METTL9), transcript variant 1, mRNA [NM_016025]	51108	GO:0005515	21668074	chr16	21668015	+	hs|16p12.2	NM_016025	chr16:21668015-21668074	NM_016025	Hs.279583
A_19_P00808072	3.27488	1.71144	3.27488	up	lnc-RTL1-2	lnc-RTL1-2:1	FALSE	LNCipedia lincRNA (lnc-RTL1-2), lincRNA [lnc-RTL1-2:1]			101538514	chr14	101538455	-	hs|14q32.31		chr14:101538514-101538455
A_21_P0010267	3.23192	1.69239	3.23192	up	lnc-TPTE-3	lnc-TPTE-3:3	FALSE	LNCipedia lincRNA (lnc-TPTE-3), lincRNA [lnc-TPTE-3:3]			9827566	chr21	9827507	-	hs|21p11.2	HQ013231	chr21:9827566-9827507		Hs.426704
A_33_P3365392	2.98951	1.57991	2.98951	up	LOC401557	uncharacterized LOC401557	FALSE	Homo sapiens uncharacterized LOC401557 (LOC401557), long non-coding RNA [NR_046107]	401557		138076922	chr9	138076863	+	hs|9q34.3	NR_046107	chr9:138076863-138076922	NR_046107	Hs.640138
A_21_P0002541	2.76514	1.46735	2.76514	up	lnc-TNP1-2	lnc-TNP1-2:1	FALSE	LNCipedia lincRNA (lnc-TNP1-2), lincRNA [lnc-TNP1-2:1]			217726622	chr2	217726563	-	hs|2q35		chr2:217726622-217726563
A_33_P3293381	2.21571	1.14777	2.21571	up	RASSF4	Ras association (RalGDS/AF-6) domain family member 4	FALSE	Ras association (RalGDS/AF-6) domain family member 4 [Source:HGNC Symbol;Acc:HGNC:20793] [ENST00000428466]	83937	GO:0005515|GO:0007165|GO:0007049	45478469	chr10	45478410	+	hs|10q11.21		chr10:45478410-45478469
A_21_P0000893	2.06044	1.04295	2.06044	up	IQCH-AS1	IQCH antisense RNA 1	FALSE	Homo sapiens IQCH antisense RNA 1 (IQCH-AS1), transcript variant 1, long non-coding RNA [NR_040051]	100506686		67696003	chr15	67695944	-	hs|15q23	NR_040051	chr15:67696003-67695944	NR_040051	Hs.656245
A_21_P0013991	2.00113	1.00082	2.00113	up			FALSE	Q5VT28_HUMAN (Q5VT28) Family with sequence similarity 27, member B (Family with sequence similarity 27, member A) (Family with sequence similarity 27, member C), complete [THC2506140]			67789755	chr9	67789696	+	hs|9q13		chr9:67789696-67789755
A_23_P130653	2.28241	1.19056	2.28241	up	RTBDN	retbindin	FALSE	Homo sapiens retbindin (RTBDN), transcript variant 2, mRNA [NM_031429]	83546	GO:0005576	12936357	chr19	12936298	-	hs|19p13.2	NM_031429	chr19:12936357-12936298	NM_031429	Hs.21162
A_33_P3342156	4.40813	2.14017	4.40813	up			FALSE	T cell receptor alpha variable 36/delta variable 7 [Source:HGNC Symbol;Acc:HGNC:12135] [ENST00000390463]			22695122	chr14	22695063	+	hs|14q11.2	AB305786	chr14:22695063-22695122		Hs.121492
A_19_P00813482	2.17128	1.11854	2.17128	up	CRHR1-IT1	CRHR1 intronic transcript 1 (non-protein coding)	FALSE	Homo sapiens CRHR1 intronic transcript 1 (non-protein coding) (CRHR1-IT1), transcript variant 1, long non-coding RNA [NR_026905]	147081	GO:0005576	43719252	chr17	43719193	+	hs|17q21.31	NR_026905	chr17:43719193-43719252	NR_026905	Hs.128813
A_19_P00320597	2.12228	1.08561	2.12228	up	LOC643733	caspase 4, apoptosis-related cysteine peptidase pseudogene	FALSE	Homo sapiens caspase 4, apoptosis-related cysteine peptidase pseudogene (LOC643733), transcript variant 2, non-coding RNA [NR_034079]	643733		104779686	chr11	104779627	-	hs|11q22.3	NR_034079	chr11:104779686-104779627	NR_034079	Hs.713751
A_33_P3237260	3.17733	1.66781	3.17733	up	C11orf53	chromosome 11 open reading frame 53	FALSE	Homo sapiens chromosome 11 open reading frame 53 (C11orf53), mRNA [NM_198498]	341032		111156970	chr11	111156911	+	hs|11q23.1	NM_198498	chr11:111156911-111156970	NM_198498	Hs.298685
A_33_P3291484	2.73038	1.4491	2.73038	up	ST8SIA4	ST8 alpha-N-acetyl-neuraminide alpha-2,8-sialyltransferase 4	FALSE	Homo sapiens ST8 alpha-N-acetyl-neuraminide alpha-2,8-sialyltransferase 4 (ST8SIA4), transcript variant 1, mRNA [NM_005668]	7903	GO:0003828|GO:0009311|GO:0007399|GO:0030173|GO:0000139|GO:0007411|GO:0006491|GO:0001574|GO:0006486|GO:0033691|GO:0006488|GO:0044267|GO:0006464|GO:0043687|GO:0018279	100143016	chr5	100142957	-	hs|5q21.1	NM_005668	chr5:100143016-100142957	NM_005668	Hs.308628
A_33_P3318322	4.22733	2.07975	4.22733	up	STEAP4	STEAP family member 4	FALSE	Homo sapiens STEAP family member 4 (STEAP4), transcript variant 2, mRNA [NM_001205315]	79689	GO:0052851|GO:0005886|GO:0000139|GO:0015677|GO:0045444|GO:0016021|GO:0008823|GO:0055072|GO:0046872|GO:0070062|GO:0055114|GO:0005768	87912171	chr7	87912112	-	hs|7q21.12	NM_001205315	chr7:87912171-87912112	NM_001205315	Hs.521008
A_23_P206454	2.00926	1.00667	2.00926	up	CENPBD1	CENPB DNA-binding domains containing 1	FALSE	Homo sapiens CENPB DNA-binding domains containing 1 (CENPBD1), mRNA [NM_145039]	92806	GO:0005634|GO:0003677	90036439	chr16	90036380	-	hs|16q24.3	NM_145039	chr16:90036439-90036380	NM_145039	Hs.513832
A_21_P0001724	2.2413	1.16433	2.2413	up	lnc-SLC9A1-1	lnc-SLC9A1-1:1	FALSE	LNCipedia lincRNA (lnc-SLC9A1-1), lincRNA [lnc-SLC9A1-1:1]			27560841	chr1	27560782	-	hs|1p36.11		chr1:27560841-27560782		Hs.638761
A_33_P3401658	2.612	1.38515	2.612	up	PSG2	pregnancy specific beta-1-glycoprotein 2	FALSE	Homo sapiens pregnancy specific beta-1-glycoprotein 2 (PSG2), mRNA [NM_031246]	5670	GO:0003674|GO:0007565|GO:0016477|GO:0005576|GO:0005575	43576077	chr19	43576018	-	hs|19q13.31	NM_031246	chr19:43576077-43576018	NM_031246	Hs.709200
A_21_P0005119	2.27818	1.18788	2.27818	up	lnc-SH3BGRL2-1	lnc-SH3BGRL2-1:1	FALSE	LNCipedia lincRNA (lnc-SH3BGRL2-1), lincRNA [lnc-SH3BGRL2-1:1]			80251450	chr6	80251391	+	hs|6q14.1		chr6:80251391-80251450
A_24_P838448	2.05371	1.03823	2.05371	up	CASC15	cancer susceptibility candidate 15 (non-protein coding)	FALSE	Homo sapiens cancer susceptibility candidate 15 (non-protein coding) (CASC15), long non-coding RNA [NR_015410]	401237		22194525	chr6	22194466	+	hs|6p22.3	NR_015410	chr6:22194466-22194525	NR_015410	Hs.712707
A_24_P292470	2.3493	1.23223	2.3493	up	UCP3	uncoupling protein 3 (mitochondrial, proton carrier)	FALSE	Homo sapiens uncoupling protein 3 (mitochondrial, proton carrier) (UCP3), transcript variant short, mRNA [NM_022803]	7352	GO:0005515|GO:0006629|GO:0032868|GO:0014823|GO:0001666|GO:0005215|GO:0007585|GO:0007584|GO:0007568|GO:0009409|GO:0005743|GO:0051384|GO:0044281|GO:0032870|GO:0022904|GO:0005739|GO:0017077|GO:0006631|GO:0000303|GO:0016021|GO:0006839|GO:0044237|GO:0015992	73714957	chr11	73714898	-	hs|11q13.4	NM_022803	chr11:73714957-73714898	NM_022803	Hs.101337
A_24_P315638	2.9412	1.5564	2.9412	up	MRGPRE	MAS-related GPR, member E	FALSE	Homo sapiens MAS-related GPR, member E (MRGPRE), mRNA [NM_001039165]	116534	GO:0007186|GO:0005886|GO:0004930|GO:0016021	3249338	chr11	3249279	-	hs|11p15.4	NM_001039165	chr11:3249338-3249279	NM_001039165	Hs.745512
A_21_P0002446	2.07802	1.05521	2.07802	up	lnc-USP34-1	lnc-USP34-1:5	FALSE	LNCipedia lincRNA (lnc-USP34-1), lincRNA [lnc-USP34-1:5]			61368001	chr2	61367942	-	hs|2p15		chr2:61368001-61367942
A_24_P299474	2.0618	1.0439	2.0618	up	TENM2	teneurin transmembrane protein 2	FALSE	Homo sapiens teneurin transmembrane protein 2 (TENM2), mRNA [NM_001122679]	57451	GO:0005515|GO:0043005|GO:0030054|GO:0035584|GO:0005886|GO:0005783|GO:0051491|GO:0045202|GO:0005634|GO:0030175|GO:0030425|GO:0042803|GO:0030426|GO:0016337|GO:0043197|GO:0007411|GO:0005911|GO:0045211|GO:0050839|GO:0007157|GO:0005794|GO:0046982|GO:0005102|GO:0000122|GO:0006351|GO:0007165|GO:0097264|GO:0005887|GO:0016605	167690122	chr5	167690063	+	hs|5q34	NM_001122679	chr5:167690063-167690122	NM_001122679	Hs.631957
A_21_P0009280	4.09577	2.03413	4.09577	up	lnc-SEPT9-4	lnc-SEPT9-4:1	FALSE	LNCipedia lincRNA (lnc-SEPT9-4), lincRNA [lnc-SEPT9-4:1]			75663807	chr17	75663748	+	hs|17q25.3		chr17:75663748-75663807
A_33_P3824237	3.05564	1.61147	3.05564	up	LINC00857	long intergenic non-protein coding RNA 857	FALSE	Homo sapiens long intergenic non-protein coding RNA 857 (LINC00857), long non-coding RNA [NR_038464]	439990		81979410	chr10	81979351	+	hs|10q22.3	NR_038464	chr10:81979351-81979410	NR_038464	Hs.365566
A_32_P67526	4.548	2.18523	4.548	up	CFAP221	cilia and flagella associated protein 221	FALSE	Homo sapiens cilia and flagella associated protein 221 (CFAP221), transcript variant 1, mRNA [NM_001271049]	200373	GO:0005929|GO:0005516|GO:0005930|GO:0060271|GO:0003341	120409613	chr2	120409554	+	hs|2q14.2	NM_001271049	chr2:120409554-120409613	NM_001271049	Hs.496753
A_33_P3231447	2.11588	1.08126	2.11588	up	ITGA6	integrin, alpha 6	FALSE	Homo sapiens integrin, alpha 6 (ITGA6), transcript variant 2, mRNA [NM_000210]	3655	GO:0005515|GO:2001237|GO:0030056|GO:0033627|GO:0005886|GO:0097186|GO:0010811|GO:0030175|GO:0050900|GO:0046872|GO:0016337|GO:0009925|GO:0005913|GO:0030198|GO:0045944|GO:0031668|GO:0031581|GO:0046847|GO:0010668|GO:0043065|GO:0022409|GO:0009986|GO:0034329|GO:0031589|GO:0048565|GO:0034676|GO:0005604|GO:0071407|GO:0005178|GO:0007160|GO:0050873|GO:0007596|GO:0007229|GO:0043236|GO:0035878|GO:0007044|GO:…	173369262	chr2	173369203	+	hs|2q31.1	NM_000210	chr2:173369203-173369262	NM_000210	Hs.133397
A_21_P0006571	2.48598	1.31382	2.48598	up	lnc-AKAP14-1	lnc-AKAP14-1:2	FALSE	LNCipedia lincRNA (lnc-AKAP14-1), lincRNA [lnc-AKAP14-1:2]			119126833	chrX	119126774	+	hs|Xq24		chrX:119126774-119126833
A_33_P3316522	2.35507	1.23577	2.35507	up	DEFB124	defensin, beta 124	FALSE	Homo sapiens defensin, beta 124 (DEFB124), mRNA [NM_001037500]	245937	GO:0009986|GO:0045087|GO:0005576|GO:0042742	30053368	chr20	30053309	-	hs|20q11.21	NM_001037500	chr20:30053368-30053309	NM_001037500	Hs.381373
A_23_P96658	2.31164	1.20892	2.31164	up	TXLNGY	taxilin gamma pseudogene, Y-linked	FALSE	Homo sapiens taxilin gamma pseudogene, Y-linked (TXLNGY), transcript variant 1, non-coding RNA [NR_045128]	246126	GO:0019905	21767217	chrY	21767158	+	hs|Yq11.222	NR_045128	chrY:21767158-21767217	NR_045128	Hs.522863
A_21_P0000516	2.70943	1.43799	2.70943	up	PSG10P	pregnancy specific beta-1-glycoprotein 10, pseudogene	FALSE	Homo sapiens pregnancy specific beta-1-glycoprotein 10, pseudogene (PSG10P), non-coding RNA [NR_026824]	653492		43343728	chr19	43343492	-	hs|19q13.2	NR_026824	chr19:43343728-43343492	NR_026824	Hs.655399
A_21_P0011895	2.15724	1.10919	2.15724	up	LOC102723927	uncharacterized LOC102723927	FALSE		102723927		242913527	chr2	242913468	+	hs|2q37.3		chr2:242913468-242913527	XR_425551
A_21_P0009690	2.08001	1.05659	2.08001	up	LOC102725254	uncharacterized LOC102725254	FALSE	PREDICTED: Homo sapiens uncharacterized LOC102725254 (LOC102725254), ncRNA [XR_433547]	102725254		18316355	chr19	18316296	+	hs|19p13.11		chr19:18316296-18316355	XR_433547
A_21_P0008799	4.90431	2.29405	4.90431	up	lnc-PGPEP1L-1	lnc-PGPEP1L-1:3	FALSE	LNCipedia lincRNA (lnc-PGPEP1L-1), lincRNA [lnc-PGPEP1L-1:3]			99635799	chr15	99635740	-	hs|15q26.3		chr15:99635799-99635740
A_23_P8640	2.04077	1.02911	2.04077	up	GPER1	G protein-coupled estrogen receptor 1	FALSE	Homo sapiens G protein-coupled estrogen receptor 1 (GPER1), transcript variant 3, mRNA [NM_001039966]	2852	GO:0005802|GO:0005515|GO:0030054|GO:0045599|GO:0019228|GO:0005622|GO:0032024|GO:0005496|GO:0048786|GO:0045745|GO:0005794|GO:0030335|GO:0031966|GO:0045742|GO:0004930|GO:0014069|GO:0014068|GO:0044327|GO:0043280|GO:0042734|GO:0007049|GO:0007186|GO:0005887|GO:0045087|GO:0005789|GO:0030263|GO:0030264|GO:0032962|GO:0001956|GO:0030424|GO:0048471|GO:0008284|GO:0008285|GO:0005886|GO:0005783|GO:0030819|GO:…	1133395	chr7	1133336	+	hs|7p22.3	NM_001039966	chr7:1133336-1133395	NM_001039966	Hs.20961
A_21_P0005840	2.13041	1.09113	2.13041	up	LINC01301	long intergenic non-protein coding RNA 1301	FALSE	Homo sapiens long intergenic non-protein coding RNA 1301 (LINC01301), long non-coding RNA [NR_103854]	100505532		61317386	chr8	61317327	-	hs|8q12.1	NR_103854	chr8:61317386-61317327	NR_103854	Hs.720321
A_33_P3607359	2.08963	1.06325	2.08963	up	LOC399815	chromosome 10 open reading frame 88 pseudogene	FALSE	Homo sapiens chromosome 10 open reading frame 88 pseudogene (LOC399815), non-coding RNA [NR_027282]	399815		124648124	chr10	124648065	+	hs|10q26.13	NR_027282	chr10:124648065-124648124	NR_027282	Hs.113871
A_33_P3369706	2.5465	1.34852	2.5465	up	LINC01574	long intergenic non-protein coding RNA 1574	FALSE	Homo sapiens long intergenic non-protein coding RNA 1574 (LINC01574), long non-coding RNA [NR_108030]	102577424		176170870	chr5	176170811	+	hs|5q35.2	NR_108030	chr5:176170811-176170870	NR_108030	Hs.349025
A_24_P392110	2.18773	1.12944	2.18773	up	PSG8	pregnancy specific beta-1-glycoprotein 8	FALSE	Homo sapiens pregnancy specific beta-1-glycoprotein 8 (PSG8), transcript variant 1, mRNA [NM_182707]	440533	GO:0005576	43258549	chr19	43258490	-	hs|19q13.2	NM_182707	chr19:43258549-43258490	NM_182707	Hs.466843
A_33_P3378785	2.28937	1.19495	2.28937	up	FAM99A	family with sequence similarity 99, member A (non-protein coding)	FALSE	family with sequence similarity 99, member A (non-protein coding) [Source:HGNC Symbol;Acc:HGNC:32368] [ENST00000538190]	387742		1687683	chr11	1687624	+	hs|11p15.5	AK124823	chr11:1687624-1687683		Hs.567908
A_33_P3280841	3.82236	1.93446	3.82236	up	LINC00671	long intergenic non-protein coding RNA 671	FALSE	Homo sapiens long intergenic non-protein coding RNA 671 (LINC00671), long non-coding RNA [NR_027254]	388387		41031657	chr17	41031598	-	hs|17q21.31	NR_027254	chr17:41031657-41031598	NR_027254	Hs.632257
A_33_P3398251	3.92719	1.9735	3.92719	up	FOXP3	forkhead box P3	FALSE	Homo sapiens forkhead box P3 (FOXP3), transcript variant 1, mRNA [NM_014009]	50943	GO:0005515|GO:0032753|GO:0003700|GO:0006366|GO:0032693|GO:0032715|GO:0003705|GO:0000981|GO:0002513|GO:0032714|GO:0032713|GO:0032792|GO:0001816|GO:0042803|GO:0032914|GO:0042130|GO:0045077|GO:0002361|GO:0002262|GO:0043029|GO:0032689|GO:0035035|GO:0003714|GO:0032720|GO:0002725|GO:0000122|GO:0045085|GO:0043234|GO:0042110|GO:0002669|GO:0045893|GO:0045892|GO:0002456|GO:0032831|GO:0008285|GO:0001782|GO:…	49107469	chrX	49107410	-	hs|Xp11.23	NM_014009	chrX:49107469-49107410	NM_014009	Hs.247700
A_23_P46894	3.152	1.65627	3.152	up	CHAT	choline O-acetyltransferase	FALSE	Homo sapiens choline O-acetyltransferase (CHAT), transcript variant M, mRNA [NM_020549]	1103	GO:0030424|GO:0004102|GO:0043179|GO:0007268|GO:0005634|GO:0044281|GO:0007274|GO:0016358|GO:0007269|GO:0005829|GO:0005739|GO:0005737|GO:0007517|GO:0007529|GO:0043025|GO:0007628|GO:0007622|GO:0042136|GO:0006644|GO:0046474|GO:0006656	50859961	chr10	50857655	+	hs|10q11.23	NM_020549	chr10:50857655-50859961	NM_020549	Hs.302002
A_33_P3315906	3.48338	1.80049	3.48338	up	PTP4A3	protein tyrosine phosphatase type IVA, member 3	FALSE	Homo sapiens protein tyrosine phosphatase type IVA, member 3 (PTP4A3), transcript variant 1, mRNA [NM_032611]	11156	GO:0005886|GO:0043542|GO:0004727|GO:0035335|GO:0005769	142441159	chr8	142441100	+	hs|8q24.3	NM_032611	chr8:142441100-142441159	NM_032611	Hs.744870
A_33_P3315510	2.47089	1.30503	2.47089	up	ANKS1A	ankyrin repeat and sterile alpha motif domain containing 1A	FALSE	Homo sapiens ankyrin repeat and sterile alpha motif domain containing 1A, mRNA (cDNA clone MGC:42354 IMAGE:4819948), complete cds. [BC031934]	23294	GO:0016322|GO:0005515|GO:0043005|GO:0005737|GO:0048013|GO:0006929|GO:0005654	35085250	chr6	35085195	+	hs|6p21.31	BC031934	chr6:35085195-35085250		Hs.656492
A_33_P3329419	2.6571	1.40985	2.6571	up	DNM1	dynamin 1	FALSE	Homo sapiens dynamin 1 (DNM1), transcript variant 5, mRNA [NM_001288739]	1759	GO:0072583|GO:0050998|GO:0005515|GO:0048013|GO:0005886|GO:0019901|GO:0005874|GO:0003924|GO:0005525|GO:0008022|GO:0032403|GO:0006898|GO:0030117|GO:0042802|GO:0006897|GO:0031623|GO:0007411|GO:0007032|GO:0070062	131013217	chr9	131013158	+	hs|9q34.11	NM_001288739	chr9:131013158-131013217	NM_001288739	Hs.522413
A_21_P0009382	2.29378	1.19773	2.29378	up	LINC01563	long intergenic non-protein coding RNA 1563	FALSE	Homo sapiens long intergenic non-protein coding RNA 1563 (LINC01563), transcript variant 1, long non-coding RNA [NR_110895]	101060544		20988112	chr17	20979250	+	hs|17p11.2		chr17:20979250-20988112	NR_110895	Hs.585812
A_23_P82979	5.28166	2.40099	5.28166	up	LAMC3	laminin, gamma 3	FALSE	Homo sapiens laminin, gamma 3 (LAMC3), mRNA [NM_006059]	10319	GO:0000904|GO:0060041|GO:0016020|GO:0030198|GO:0014002|GO:0005198|GO:0005578|GO:0005576|GO:0007155|GO:0007601|GO:0005604	133967341	chr9	133967284	+	hs|9q34.12	NM_006059	chr9:133967284-133967341	NM_006059	Hs.201805
A_33_P3555937	3.18898	1.67309	3.18898	up	STEAP4	STEAP family member 4	FALSE	Homo sapiens STEAP family member 4 (STEAP4), transcript variant 2, mRNA [NM_001205315]	79689	GO:0052851|GO:0005886|GO:0000139|GO:0015677|GO:0045444|GO:0016021|GO:0008823|GO:0055072|GO:0046872|GO:0070062|GO:0055114|GO:0005768	87907978	chr7	87907919	-	hs|7q21.12	NM_001205315	chr7:87907978-87907919	NM_001205315	Hs.521008
A_23_P27306	2.58458	1.36993	2.58458	up	COLEC12	collectin sub-family member 12	FALSE	Homo sapiens collectin sub-family member 12 (COLEC12), mRNA [NM_130386]	81035	GO:0005581|GO:0005886|GO:0030169|GO:0006952|GO:0006910|GO:0046872|GO:0006898|GO:0030666|GO:0002221|GO:0009756|GO:0005534|GO:0045087|GO:0051260|GO:0016021|GO:0070062|GO:0005044|GO:0008329	319757	chr18	319698	-	hs|18p11.32	NM_130386	chr18:319757-319698	NM_130386	Hs.464422
A_33_P3358957	2.4965	1.3199	2.4965	up	PAPL	iron/zinc purple acid phosphatase-like protein	FALSE	Homo sapiens iron/zinc purple acid phosphatase-like protein (PAPL), mRNA [NM_001004318]	390928	GO:0016311|GO:0003993|GO:0005576|GO:0046872	39601478	chr19	39601419	+	hs|19q13.2	NM_001004318	chr19:39601419-39601478	NM_001004318	Hs.448934
A_24_P224488	2.43423	1.28346	2.43423	up	MAPT	microtubule-associated protein tau	FALSE	Homo sapiens microtubule-associated protein tau (MAPT), transcript variant 1, mRNA [NM_016835]	4137	GO:0008017|GO:0005515|GO:0030424|GO:0017124|GO:0005886|GO:0048699|GO:0045773|GO:0048675|GO:0006921|GO:0005829|GO:0030426|GO:0047497|GO:0007628|GO:0045298|GO:0071813|GO:0031116|GO:0032387|GO:0019901|GO:0005930|GO:0005875|GO:0005874|GO:0031113|GO:0006915|GO:0000226|GO:0060632|GO:0034399|GO:0005200|GO:0010506|GO:0008088|GO:0034185|GO:0001764|GO:0019899	44105548	chr17	44105489	+	hs|17q21.31	NM_016835	chr17:44105489-44105548	NM_016835	Hs.101174
A_23_P502627	5.27268	2.39854	5.27268	up	ZXDA	zinc finger, X-linked, duplicated A	FALSE	Homo sapiens zinc finger, X-linked, duplicated A (ZXDA), mRNA [NM_007156]	7789	GO:0005515|GO:0003700|GO:0070742|GO:0005634|GO:0045893|GO:0003676|GO:0046872|GO:0006351	57935074	chrX	57935015	-	hs|Xp11.21	NM_007156	chrX:57935074-57935015	NM_007156	Hs.550094
A_32_P148538	3.04341	1.60569	3.04341	up	LPPR4	lipid phosphate phosphatase-related protein type 4	FALSE	Homo sapiens lipid phosphate phosphatase-related protein type 4 (LPPR4), transcript variant 1, mRNA [NM_014839]	9890	GO:0048839|GO:0042577|GO:0046839|GO:0005887|GO:0008195|GO:0007409	99774749	chr1	99774690	+	hs|1p21.2	NM_014839	chr1:99774690-99774749	NM_014839	Hs.13245
A_33_P3415551	2.76909	1.46941	2.76909	up	GPAT2	glycerol-3-phosphate acyltransferase 2, mitochondrial	FALSE	Homo sapiens glycerol-3-phosphate acyltransferase 2, mitochondrial (GPAT2), mRNA [NM_207328]	150763	GO:0005739|GO:0019432|GO:0016024|GO:0005741|GO:0004366|GO:0044281|GO:0016021|GO:0006644|GO:0006072|GO:0006654|GO:0046474	96687836	chr2	96687777	-	hs|2q11.1	NM_207328	chr2:96687836-96687777	NM_207328	Hs.348629
A_21_P0007651	3.21746	1.68592	3.21746	up	lnc-AACS-2	lnc-AACS-2:1	FALSE	LNCipedia lincRNA (lnc-AACS-2), lincRNA [lnc-AACS-2:1]			125638530	chr12	125638471	+	hs|12q24.31		chr12:125638471-125638530
A_33_P3403576	2.24601	1.16736	2.24601	up	FCGR2C	Fc fragment of IgG, low affinity IIc, receptor for (CD32) (gene/pseudogene)	FALSE	Homo sapiens Fc fragment of IgG, low affinity IIc, receptor for (CD32) (gene/pseudogene) (FCGR2C), transcript variant 1, mRNA [NM_201563]	9103	GO:0005515|GO:0007165|GO:0006955|GO:0005737|GO:0005886|GO:0019864|GO:0016021|GO:0004888	161570544	chr1	161570485	+	hs|1q23.3	NM_201563	chr1:161570485-161570544	NM_201563	Hs.656750
A_19_P00320567	2.18063	1.12475	2.18063	up			FALSE				6711176	chr6	6711117	-	hs|6p25.1		chr6:6711176-6711117
A_33_P3315634	2.4742	1.30696	2.4742	up			FALSE				1394444	chr4	1394385	-	hs|4p16.3		chr4:001394444-001394385
A_21_P0000045	2.1026	1.07218	2.1026	up	MS4A12	membrane-spanning 4-domains, subfamily A, member 12	FALSE	Homo sapiens membrane-spanning 4-domains, subfamily A, member 12 (MS4A12), transcript variant 1, mRNA [NM_017716]	54860	GO:0070588|GO:0015279|GO:0016021	60274857	chr11	60274798	+	hs|11q12.2	NM_017716	chr11:60274798-60274857	NM_017716	Hs.272789
A_23_P90925	2.52257	1.3349	2.52257	up	IL36B	interleukin 36, beta	FALSE	Homo sapiens interleukin 36, beta (IL36B), transcript variant 2, mRNA [NM_173178]	27177	GO:0032755|GO:0006955|GO:0005149|GO:0006954|GO:0045087|GO:0019221|GO:0005576|GO:0005615|GO:0005125|GO:0045582	113786581	chr2	113786522	-	hs|2q13	NM_173178	chr2:113786581-113786522	NM_173178	Hs.278909
A_33_P3325634	2.40797	1.26782	2.40797	up	ERICH4	glutamate-rich 4	FALSE	Homo sapiens glutamate-rich 4 (ERICH4), mRNA [NM_001130514]	100170765		41950129	chr19	41950070	+	hs|19q13.2	NM_001130514	chr19:41950070-41950129	NM_001130514	Hs.649452
A_21_P0013308	2.31433	1.21059	2.31433	up	XLOC_l2_013846		FALSE	BROAD Institute lincRNA (XLOC_l2_013846), lincRNA [TCONS_l2_00026593]			56949984	chr7	56949925	-	hs|7p11.2		chr7:56949984-56949925		Hs.742891
A_21_P0013400	5.0168	2.32677	5.0168	up			FALSE				108254393	chr7	108243670	+	hs|7q31.1		chr7:108243670-108254393
A_21_P0008056	2.57927	1.36696	2.57927	up	lnc-C13orf15-1	lnc-C13orf15-1:1	FALSE	LNCipedia lincRNA (lnc-C13orf15-1), lincRNA [lnc-C13orf15-1:1]			42080312	chr13	42080253	+	hs|13q14.11		chr13:42080253-42080312
A_23_P421011	2.1553	1.10789	2.1553	up	KAZALD1	Kazal-type serine peptidase inhibitor domain 1	FALSE	Homo sapiens Kazal-type serine peptidase inhibitor domain 1 (KAZALD1), mRNA [NM_030929]	81621	GO:0001503|GO:0030198|GO:0007275|GO:0005614|GO:0001558|GO:0030154|GO:0005520	102825329	chr10	102825270	+	hs|10q24.31	NM_030929	chr10:102825270-102825329	NM_030929	Hs.632079
A_33_P3220149	2.44721	1.29114	2.44721	up	MAML1	mastermind-like 1 (Drosophila)	FALSE	mastermind-like 1 (Drosophila) [Source:HGNC Symbol;Acc:HGNC:13632] [ENST00000503050]	9794	GO:0005515|GO:0010467|GO:0006367|GO:0019901|GO:0003713|GO:0010831|GO:0005634|GO:0003162|GO:0007221|GO:0043231|GO:0002193|GO:0060928|GO:0007219|GO:0016607|GO:0045944|GO:0042605|GO:0045445|GO:0005654|GO:0006468	179223272	chr5	179223213	+	hs|5q35.3	AB209135	chr5:179223213-179223272		Hs.631951
A_23_P150583	2.31747	1.21255	2.31747	up	SCGB1A1	secretoglobin, family 1A, member 1 (uteroglobin)	FALSE	Homo sapiens secretoglobin, family 1A, member 1 (uteroglobin) (SCGB1A1), mRNA [NM_003357]	7356	GO:0005515|GO:0032714|GO:0032713|GO:0005635|GO:0034021|GO:0005615|GO:0071774|GO:0042130|GO:0032496|GO:0030141|GO:0009410|GO:0034097|GO:0032689|GO:0070062|GO:0005791|GO:0043488|GO:0007565|GO:0007566|GO:0042493|GO:0010193|GO:0050727|GO:0051384|GO:0019834|GO:0000122|GO:0043086|GO:0007165|GO:0032696	62190532	chr11	62189823	+	hs|11q12.3	NM_003357	chr11:62189823-62190532	NM_003357	Hs.523732
A_21_P0013919	2.44624	1.29057	2.44624	up	FAM27E3	family with sequence similarity 27, member E3	FALSE	Homo sapiens family with sequence similarity 27, member E3 (FAM27E3), long non-coding RNA [NR_103833]	100131997		67786131	chr9	67786072	-	hs|9q13	NR_103833	chr9:67786131-67786072	NR_103833	Hs.567050
A_21_P0011716	2.20504	1.14081	2.20504	up	XLOC_l2_006832		FALSE	BROAD Institute lincRNA (XLOC_l2_006832), lincRNA [TCONS_l2_00012718]			56123010	chr19	56122951	+	hs|19q13.42		chr19:56122951-56123010
A_32_P136351	3.15727	1.65868	3.15727	up	SLITRK1	SLIT and NTRK-like family, member 1	FALSE	Homo sapiens SLIT and NTRK-like family, member 1 (SLITRK1), transcript variant 1, mRNA [NM_052910]	114798	GO:0035264|GO:0042592|GO:0030534|GO:0016021|GO:0007409	84451607	chr13	84451548	-	hs|13q31.1	NM_052910	chr13:84451607-84451548	NM_052910	Hs.415478
A_19_P00810894	2.09559	1.06736	2.09559	up	FLJ40288	uncharacterized FLJ40288	FALSE	uncharacterized FLJ40288 [Source:EntrezGene;Acc:286023] [ENST00000573229]	286023		132356998	chr7	132356939	+	hs|7q32.3		chr7:132356939-132356998
A_33_P3620488	2.88422	1.52818	2.88422	up	CATSPERG	catsper channel auxiliary subunit gamma	FALSE	Homo sapiens catsper channel auxiliary subunit gamma (CATSPERG), mRNA [NM_021185]	57828	GO:0007338|GO:0035036|GO:0005886|GO:0036128|GO:0097228|GO:0007275|GO:0007283|GO:0030154|GO:0032504	38861558	chr19	38861499	+	hs|19q13.2	NM_021185	chr19:38861499-38861558	NM_021185	Hs.324335
A_21_P0013451	3.09799	1.63133	3.09799	up	LINC01510	long intergenic non-protein coding RNA 1510	FALSE	Homo sapiens long intergenic non-protein coding RNA 1510 (LINC01510), long non-coding RNA [NR_120506]	100996266		116203937	chr7	116203878	-	hs|7q31.2		chr7:116203937-116203878	NR_120506
A_21_P0007786	2.91835	1.54516	2.91835	up	LINC00944	long intergenic non-protein coding RNA 944	FALSE	Homo sapiens long intergenic non-protein coding RNA 944 (LINC00944), long non-coding RNA [NR_033878]	387895		127230820	chr12	127216910	-	hs|12q24.32	NR_033878	chr12:127230820-127216910	NR_033878	Hs.534660
A_23_P129075	2.00889	1.0064	2.00889	up	WDR76	WD repeat domain 76	FALSE	Homo sapiens WD repeat domain 76 (WDR76), transcript variant 1, mRNA [NM_024908]	79968		44158674	chr15	44158615	+	hs|15q15.3	NM_024908	chr15:44158615-44158674	NM_024908	Hs.250154
A_33_P3212804	4.1017	2.03622	4.1017	up	C22orf42	chromosome 22 open reading frame 42	FALSE	Homo sapiens chromosome 22 open reading frame 42 (C22orf42), mRNA [NM_001010859]	150297		32546373	chr22	32546314	-	hs|22q12.3	NM_001010859	chr22:32546373-32546314	NM_001010859	Hs.426551
A_21_P0011914	2.75422	1.46165	2.75422	up	XLOC_l2_008009		FALSE	BROAD Institute lincRNA (XLOC_l2_008009), lincRNA [TCONS_l2_00014564]			47958573	chr2	47958514	-	hs|2p16.3		chr2:47958573-47958514
A_21_P0011008	4.03801	2.01365	4.03801	up	XLOC_l2_002651		FALSE	BROAD Institute lincRNA (XLOC_l2_002651), lincRNA [TCONS_l2_00005005]			50238973	chr11	50238914	-	hs|11p11.12		chr11:50238973-50238914		Hs.144683
A_21_P0013928	2.43532	1.28411	2.43532	up			FALSE
A_21_P0000866	2.05163	1.03677	2.05163	up	RBM26-AS1	RBM26 antisense RNA 1	FALSE	Homo sapiens RBM26 antisense RNA 1 (RBM26-AS1), long non-coding RNA [NR_038991]	100505538		79998428	chr13	79998369	+	hs|13q31.1	NR_038991	chr13:79998369-79998428	NR_038991	Hs.600720
A_21_P0009377	2.0703	1.04984	2.0703	up	lnc-NLGN2-1	lnc-NLGN2-1:2	FALSE	LNCipedia lincRNA (lnc-NLGN2-1), lincRNA [lnc-NLGN2-1:2]			7308687	chr17	7308628	+	hs|17p13.1		chr17:7308628-7308687
A_33_P3383381	3.39642	1.76401	3.39642	up	SPHKAP	SPHK1 interactor, AKAP domain containing	FALSE	Homo sapiens SPHK1 interactor, AKAP domain containing (SPHKAP), transcript variant 1, mRNA [NM_001142644]	80309	GO:0005739|GO:0005515|GO:0030018|GO:0006928|GO:0010738|GO:0051018|GO:0070062	228846461	chr2	228846402	-	hs|2q36.3	NM_001142644	chr2:228846461-228846402	NM_001142644	Hs.436306
A_19_P00318415	2.9332	1.55248	2.9332	up	LINC01510	long intergenic non-protein coding RNA 1510	FALSE	Homo sapiens long intergenic non-protein coding RNA 1510 (LINC01510), long non-coding RNA [NR_120506]	100996266		116211265	chr7	116211206	-	hs|7q31.2	NR_120506	chr7:116211265-116211206	NR_120506	Hs.607491
A_21_P0014594	2.60119	1.37917	2.60119	up	lnc-PDCD11-1	lnc-PDCD11-1:1	FALSE	LNCipedia lincRNA (lnc-PDCD11-1), lincRNA [lnc-PDCD11-1:1]			105222259	chr10	105222200	+	hs|10q24.33		chr10:105222200-105222259
A_33_P3364180	5.11644	2.35514	5.11644	up	FGD5	FYVE, RhoGEF and PH domain containing 5	FALSE	Homo sapiens FYVE, RhoGEF and PH domain containing 5 (FGD5), mRNA [NM_152536]	152273	GO:0005515|GO:0005794|GO:0030036|GO:0031267|GO:0005783|GO:0008360|GO:0032587|GO:0001726|GO:0046872|GO:0030027|GO:0043088|GO:0043547|GO:0005085|GO:0005737|GO:0032321|GO:0007010|GO:0046847|GO:0005089|GO:0005856|GO:0005769	14975895	chr3	14975836	+	hs|3p25.1	NM_152536	chr3:14975836-14975895	NM_152536	Hs.412406
A_32_P25737	3.31862	1.73059	3.31862	up	CHIC1	cysteine-rich hydrophobic domain 1	FALSE	Homo sapiens cysteine-rich hydrophobic domain 1 (CHIC1), transcript variant 1, mRNA [NM_001039840]	53344	GO:0005622|GO:0005886|GO:0006810|GO:0016023	72906044	chrX	72905985	+	hs|Xq13.2	NM_001039840	chrX:72905985-72906044	NM_001039840	Hs.496323
A_19_P00321342	2.12279	1.08596	2.12279	up	CCDC171	coiled-coil domain containing 171	FALSE	coiled-coil domain containing 171 [Source:HGNC Symbol;Acc:HGNC:29828] [ENST00000478913]	203238		16061012	chr9	16060953	+	hs|9p22.3	AL832443	chr9:16060953-16061012		Hs.17267
A_21_P0014338	11.5854	3.53424	11.5854	up			FALSE	Homo sapiens cDNA FLJ30710 fis, clone FCBBF2001299. [AK055272]			89112798	chr16	89112739	-	hs|16q24.3	AK055272	chr16:89112798-89112739		Hs.512499
A_33_P3367917	2.01736	1.01247	2.01736	up	SSH2	slingshot protein phosphatase 2	FALSE	Homo sapiens slingshot protein phosphatase 2 (SSH2), transcript variant 3, mRNA [NM_001282130]	85464	GO:0030036|GO:0003779|GO:0003677|GO:0005615|GO:0035335|GO:0010591|GO:0005737|GO:0006470|GO:0008064|GO:0004721|GO:0008138|GO:0005856|GO:0050770|GO:0004725	28001032	chr17	28000973	-	hs|17q11.2	NM_001282130	chr17:28001032-28000973	NM_001282130	Hs.654754
A_24_P306469	2.94195	1.55677	2.94195	up			FALSE				143574757	chr3	143574698	-	hs|3q24		chr3:143574757-143574698
A_33_P3282075	2.18893	1.13023	2.18893	up	SP6	Sp6 transcription factor	FALSE	Homo sapiens Sp6 transcription factor (SP6), transcript variant 1, mRNA [NM_001258248]	80320	GO:0008284|GO:0006355|GO:0042481|GO:0005634|GO:0003677|GO:0046872|GO:0006351	45922339	chr17	45922280	-	hs|17q21.32	NM_001258248	chr17:45922339-45922280	NM_001258248	Hs.253603
A_21_P0007151	2.21075	1.14454	2.21075	up			FALSE	DA270978 BRCAN2 Homo sapiens cDNA clone BRCAN2025386 5', mRNA sequence [DA270978]			131121708	chr11	131121649	+	hs|11q25		chr11:131121649-131121708		Hs.577366
A_21_P0001240	2.11347	1.07961	2.11347	up	lnc-EGLN1-1	lnc-EGLN1-1:4	FALSE	LNCipedia lincRNA (lnc-EGLN1-1), lincRNA [lnc-EGLN1-1:4]			231662915	chr1	231662856	-	hs|1q42.2		chr1:231662915-231662856
A_19_P00801597	7.94862	2.9907	7.94862	up	lnc-SNX10-2	lnc-SNX10-2:6	FALSE	Homo sapiens cDNA FLJ31922 fis, clone NT2RP7005219. [AK056484]			26537344	chr7	26537285	+	hs|7p15.2		chr7:26537285-26537344		Hs.587432
A_33_P3265159	2.40067	1.26344	2.40067	up	GAPVD1	GTPase activating protein and VPS9 domains 1	FALSE	Homo sapiens cDNA clone IMAGE:5203707, containing frame-shift errors. [BC110990]	26130	GO:0043547|GO:0032794|GO:0005085|GO:0007165|GO:0016020|GO:0051223|GO:0032318|GO:0006897|GO:0005829|GO:0005768|GO:0005096	128071560	chr9	128071501	+	hs|9q33.3	BC110990	chr9:128071501-128071560		Hs.495134
A_33_P3322274	2.472	1.30568	2.472	up	TNFRSF1B	tumor necrosis factor receptor superfamily, member 1B	FALSE	Homo sapiens tumor necrosis factor receptor superfamily, member 1B (TNFRSF1B), mRNA [NM_001066]	7133	GO:0005515|GO:0051044|GO:0048471|GO:0005886|GO:0008630|GO:0007568|GO:0005576|GO:0005634|GO:0097191|GO:0033209|GO:0050779|GO:0006955|GO:0071222|GO:0005031|GO:0006954|GO:0071363|GO:0050728|GO:0043196|GO:0043025|GO:0045121|GO:0016021|GO:0031625	12253051	chr1	12252992	+	hs|1p36.22	NM_001066	chr1:12252992-12253051	NM_001066	Hs.256278
A_33_P3268910	2.50088	1.32243	2.50088	up	SPRY1	sprouty homolog 1, antagonist of FGF signaling (Drosophila)	FALSE	Homo sapiens sprouty homolog 1, antagonist of FGF signaling (Drosophila) (SPRY1), transcript variant 1, mRNA [NM_001258038]	10252	GO:0001656|GO:0005515|GO:0001657|GO:0008285|GO:0005886|GO:0000132|GO:0042059|GO:0001759|GO:0051387|GO:0005829|GO:0046580|GO:0007173|GO:0043407|GO:0040037|GO:0070373|GO:0060449|GO:0034261	124318977	chr4	124318918	+	hs|4q28.1	NM_001258038	chr4:124318918-124318977	NM_001258038	Hs.744854
A_33_P3271276	2.06489	1.04607	2.06489	up	PSG5	pregnancy specific beta-1-glycoprotein 5	FALSE	Homo sapiens pregnancy specific beta-1-glycoprotein 5 (PSG5), transcript variant 2, mRNA [NM_001130014]	5673	GO:0005515|GO:0007565|GO:0005576	43674267	chr19	43674208	-	hs|19q13.31	NM_001130014	chr19:43674267-43674208	NM_001130014	Hs.654415
A_24_P884376	4.80674	2.26506	4.80674	up			FALSE				45854838	chr7	45854779	+	hs|7p12.3		chr7:45854779-45854838
A_33_P3264444	11.3861	3.5092	11.3861	up			FALSE	prefoldin subunit 6 [Source:HGNC Symbol;Acc:HGNC:4926] [ENST00000482292]			33265934	chr6	33265875	+	hs|6p21.32		chr6:33265875-33265934
A_33_P3263747	3.5881	1.84322	3.5881	up			FALSE
A_21_P0011064	8.42104	3.074	8.42104	up	XLOC_l2_003139		FALSE	BROAD Institute lincRNA (XLOC_l2_003139), lincRNA [TCONS_l2_00005881]			108308811	chr12	108308752	+	hs|12q23.3		chr12:108308752-108308811
A_23_P1552	2.50282	1.32356	2.50282	up	CTSC	cathepsin C	FALSE	Homo sapiens cathepsin C (CTSC), transcript variant 1, mRNA [NM_001814]	1075	GO:0005515|GO:0031404|GO:0005794|GO:0010033|GO:0004252|GO:0019902|GO:0005783|GO:2001235|GO:0007568|GO:0051087|GO:0006915|GO:0043621|GO:0005615|GO:0005764|GO:0042802|GO:0016505|GO:0006955|GO:0016020|GO:0001913|GO:0006508|GO:0008234|GO:0070062	88042347	chr11	88033771	-	hs|11q14.2	NM_001814	chr11:88042347-88033771	NM_001814	Hs.128065
A_32_P160896	2.20998	1.14403	2.20998	up	FTMT	ferritin mitochondrial	FALSE	Homo sapiens ferritin mitochondrial (FTMT), mRNA [NM_177478]	94033	GO:0006879|GO:0005739|GO:0004322|GO:0008284|GO:0051353|GO:0051349|GO:0006826|GO:0051347|GO:0005634|GO:0055114|GO:0008199	121188318	chr5	121188259	+	hs|5q23.1	NM_177478	chr5:121188259-121188318	NM_177478	Hs.105324
A_21_P0011677	2.49726	1.32034	2.49726	up	XLOC_l2_006624		FALSE	BROAD Institute lincRNA (XLOC_l2_006624), lincRNA [TCONS_l2_00012350]			16147772	chr19	16147713	+	hs|19p13.12		chr19:16147713-16147772
A_33_P3561747	2.78514	1.47775	2.78514	up	C16orf82	chromosome 16 open reading frame 82	FALSE	Homo sapiens chromosome 16 open reading frame 82 (C16orf82), mRNA [NM_001145545]	162083		27080490	chr16	27080431	+	hs|16p12.1	NM_001145545	chr16:27080431-27080490	NM_001145545	Hs.120831
A_21_P0011925	2.42973	1.28079	2.42973	up	lnc-TEX261-2	lnc-TEX261-2:1	FALSE	DA173998 BRAMY2 Homo sapiens cDNA clone BRAMY2037005 5', mRNA sequence [DA173998]			71232158	chr2	71232099	-	hs|2p13.3		chr2:71232158-71232099		Hs.541967
A_23_P364355	3.54246	1.82475	3.54246	up			FALSE	T cell receptor beta variable 7-3 [Source:HGNC Symbol;Acc:HGNC:12237] [ENST00000390361]			142247389	chr7	142247330	-	hs|7q34	X58329	chr7:142247389-142247330		Hs.55161
A_23_P136504	2.05677	1.04038	2.05677	up	SLC25A21	solute carrier family 25 (mitochondrial oxoadipate carrier), member 21	FALSE	Homo sapiens solute carrier family 25 (mitochondrial oxoadipate carrier), member 21 (SLC25A21), transcript variant 1, mRNA [NM_030631]	89874	GO:0034641|GO:0005743|GO:0044281|GO:0016021|GO:0006554|GO:0055085	37149829	chr14	37149770	-	hs|14q13.3	NM_030631	chr14:37149829-37149770	NM_030631	Hs.730857
A_24_P475349	2.6757	1.41992	2.6757	up	RAB6B	RAB6B, member RAS oncogene family	FALSE	Homo sapiens RAB6B, member RAS oncogene family (RAB6B), mRNA [NM_016577]	51560	GO:0005515|GO:0005794|GO:0006890|GO:0003924|GO:0006891|GO:0005525|GO:0006886|GO:0006184|GO:0031489|GO:0000139|GO:0042147|GO:0016023|GO:0032482|GO:0019003	133543498	chr3	133543439	-	hs|3q22.1	NM_016577	chr3:133543498-133543439	NM_016577	Hs.715344
A_21_P0000760	6.06187	2.59976	6.06187	up	TMPRSS4-AS1	TMPRSS4 antisense RNA 1	FALSE	Homo sapiens TMPRSS4 antisense RNA 1 (TMPRSS4-AS1), long non-coding RNA [NR_038318]	100526771		117929953	chr11	117929894	-	hs|11q23.3	NR_038318	chr11:117929953-117929894	NR_038318	Hs.627426
A_23_P67198	3.27711	1.71243	3.27711	up	CPAMD8	C3 and PZP-like, alpha-2-macroglobulin domain containing 8	FALSE	Homo sapiens C3 and PZP-like, alpha-2-macroglobulin domain containing 8 (CPAMD8), mRNA [NM_015692]	27151	GO:0010951|GO:0005886|GO:0004867|GO:0005615	17003871	chr19	17003812	-	hs|19p13.11	NM_015692	chr19:17003871-17003812	NM_015692	Hs.631644
A_23_P502808	2.55592	1.35385	2.55592	up	PRIMA1	proline rich membrane anchor 1	FALSE	Homo sapiens proline rich membrane anchor 1 (PRIMA1), mRNA [NM_178013]	145270	GO:0030054|GO:0031226|GO:0051649|GO:0045202|GO:0016021|GO:0043495|GO:0042135|GO:0019899	94203650	chr14	94203591	-	hs|14q32.12	NM_178013	chr14:94203650-94203591	NM_178013	Hs.432401
A_33_P3306526	4.02154	2.00775	4.02154	up			FALSE				67276199	chr11	67276140	+	hs|11q13.2		chr11:067276140-067276199
A_33_P3259183	3.56649	1.8345	3.56649	up	FAM78B	family with sequence similarity 78, member B	FALSE	Homo sapiens family with sequence similarity 78, member B (FAM78B), mRNA [NM_001017961]	149297		166039318	chr1	166039259	-	hs|1q24.1	NM_001017961	chr1:166039318-166039259	NM_001017961	Hs.133029
A_32_P122793	2.06318	1.04487	2.06318	up	MORC2-AS1	MORC2 antisense RNA 1	FALSE	Homo sapiens MORC2 antisense RNA 1 (MORC2-AS1), long non-coding RNA [NR_026920]	150291		31322519	chr22	31322460	+	hs|22q12.2	NR_026920	chr22:31322460-31322519	NR_026920	Hs.592202
A_21_P0000349	2.4075	1.26753	2.4075	up	SCARNA3	small Cajal body-specific RNA 3	FALSE	Homo sapiens small Cajal body-specific RNA 3 (SCARNA3), guide RNA [NR_002998]	677679		175937605	chr1	175937546	-	hs|1q25.1	NR_002998	chr1:175937605-175937546	NR_002998	Hs.656119
A_21_P0007257	3.92139	1.97137	3.92139	up			FALSE				91533907	chr11	91533848	+	hs|11q14.3		chr11:91533848-91533907
A_33_P3423845	3.29447	1.72005	3.29447	up			FALSE				115530294	chr11	115530235	-	hs|11q23.3		chr11:115530294-115530235
A_33_P3414107	6.59923	2.7223	6.59923	up	LOC729040	uncharacterized LOC729040	FALSE	PREDICTED: Homo sapiens uncharacterized LOC729040 (LOC729040), misc_RNA [XR_241838]	729040		90575973	chr5	90575914	-	hs|5q14.3	XR_241838	chr5:90575973-90575914	XR_241838	Hs.678658
A_23_P375524	4.05147	2.01844	4.05147	up	LCE1D	late cornified envelope 1D	FALSE	Homo sapiens late cornified envelope 1D (LCE1D), mRNA [NM_178352]	353134	GO:0048471|GO:0005737|GO:0050890|GO:0071277|GO:0031424|GO:0001533	152770390	chr1	152770331	+	hs|1q21.3	NM_178352	chr1:152770331-152770390	NM_178352	Hs.490235
A_19_P00324582	5.40752	2.43497	5.40752	up			FALSE				26215714	chr1	26215655	+	hs|1p36.11		chr1:026215655-026215714
A_33_P3366412	12.867	3.68561	12.867	up			FALSE				43608342	chr9	43608283	-	hs|9p11.2		chr9:043608342-043608283
A_33_P3299599	2.64704	1.40438	2.64704	up	NKX2-5	NK2 homeobox 5	FALSE	Homo sapiens NK2 homeobox 5 (NKX2-5), transcript variant 2, mRNA [NM_001166175]	1482	GO:0005515|GO:0003700|GO:0001190|GO:0006366|GO:0044212|GO:0003705|GO:0003285|GO:0003350|GO:0010736|GO:0010735|GO:0010832|GO:0030878|GO:0048536|GO:0030154|GO:0042803|GO:0007512|GO:0001947|GO:0010765|GO:0010667|GO:0055005|GO:0055007|GO:0055008|GO:0045823|GO:0003278|GO:0001104|GO:0046982|GO:0045214|GO:0000122|GO:0030509|GO:0000978|GO:0055015|GO:0055014|GO:0045893|GO:0045892|GO:0008134|GO:0008284|GO:…	172659197	chr5	172659138	-	hs|5q35.1	NM_001166175	chr5:172659197-172659138	NM_001166175	Hs.54473
A_21_P0000445	2.07339	1.05199	2.07339	up	SNORD116-6	small nucleolar RNA, C/D box 116-6	FALSE	Homo sapiens small nucleolar RNA, C/D box 116-6 (SNORD116-6), small nucleolar RNA [NR_003321]	100033418		25310269	chr15	25310210	+	hs|15q11.2	NR_003321	chr15:25310210-25310269	NR_003321	Hs.578617
A_23_P397293	2.20634	1.14166	2.20634	up	LY6K	lymphocyte antigen 6 complex, locus K	FALSE	Homo sapiens lymphocyte antigen 6 complex, locus K (LY6K), transcript variant 1, mRNA [NM_017527]	54742	GO:0005737|GO:0005886|GO:0005730|GO:0005634|GO:0005576|GO:0031225	143784880	chr8	143784821	+	hs|8q24.3	NM_017527	chr8:143784821-143784880	NM_017527	Hs.69517
A_21_P0006039	2.44281	1.28854	2.44281	up	LINC01505	long intergenic non-protein coding RNA 1505	FALSE	long intergenic non-protein coding RNA 1505 [Source:HGNC Symbol;Acc:HGNC:51186] [ENST00000411451]	100996590		109435193	chr9	109427143	+	hs|9q31.2		chr9:109427143-109435193
A_33_P3272352	2.02952	1.02114	2.02952	up			FALSE	CEBPZ opposite strand [Source:HGNC Symbol;Acc:HGNC:49288] [ENST00000397064]			37440848	chr2	37440789	+	hs|2p22.2		chr2:37440789-37440848
A_21_P0001802	2.29207	1.19665	2.29207	up	SPATA3-AS1	SPATA3 antisense RNA 1 (head to head)	FALSE	Homo sapiens SPATA3 antisense RNA 1 (head to head) (SPATA3-AS1), long non-coding RNA [NR_033879]	348761		231852319	chr2	231852260	-	hs|2q37.1	NR_033879	chr2:231852319-231852260	NR_033879	Hs.404807
A_24_P194819	3.54794	1.82698	3.54794	up			FALSE	Q6NVR7_XENTR (Q6NVR7) Protease, serine, 29, partial (15%) [THC2776688]			94949218	chr9	94949159	-	hs|9q22.31		chr9:094949218-094949159
A_21_P0001939	4.89772	2.29211	4.89772	up	lnc-HOXD13-1	lnc-HOXD13-1:1	FALSE	LNCipedia lincRNA (lnc-HOXD13-1), lincRNA [lnc-HOXD13-1:1]			176768960	chr2	176768901	+	hs|2q31.1		chr2:176768901-176768960
A_21_P0014533	2.46325	1.30056	2.46325	up			FALSE	BC009031 VASH1 protein {Homo sapiens} (exp=-1; wgp=0; cg=0), partial (39%) [THC2656489]			77240389	chr14	77240330	-	hs|14q24.3		chr14:077240389-077240330
A_33_P3338275	2.08866	1.06257	2.08866	up			FALSE	chondroitin sulfate proteoglycan 4 pseudogene 8 [Source:HGNC Symbol;Acc:HGNC:48359] [ENST00000612093]			82970538	chr15	82970479	-	hs|15q25.2	AK125436	chr15:82970538-82970479		Hs.498322
A_33_P3213910	2.80508	1.48804	2.80508	up	ARHGAP30	Rho GTPase activating protein 30	FALSE	Homo sapiens Rho GTPase activating protein 30 (ARHGAP30), transcript variant 2, mRNA [NM_181720]	257106	GO:0043547|GO:0051056|GO:0007264|GO:0016023|GO:0043231|GO:0005829|GO:0005096	161019478	chr1	161019419	-	hs|1q23.3	NM_181720	chr1:161019478-161019419	NM_181720	Hs.389374
A_33_P3759737	2.54603	1.34825	2.54603	up	LINC01107	long intergenic non-protein coding RNA 1107	FALSE	Homo sapiens long intergenic non-protein coding RNA 1107 (LINC01107), long non-coding RNA [NR_037809]	151171		239419392	chr2	239419333	-	hs|2q37.3	NR_037809	chr2:239419392-239419333	NR_037809	Hs.652076
A_23_P165007	2.12791	1.08944	2.12791	up	RASGRP4	RAS guanyl releasing protein 4	FALSE	Homo sapiens RAS guanyl releasing protein 4 (RASGRP4), transcript variant a, mRNA [NM_170604]	115727	GO:0005886|GO:0007264|GO:0008283|GO:0005509|GO:0009991|GO:0046579|GO:0007202|GO:0019992|GO:0030742|GO:0005737|GO:0008277|GO:0032320|GO:0016020|GO:0030099|GO:0016049|GO:0007169|GO:0005088	38899919	chr19	38899860	-	hs|19q13.2	NM_170604	chr19:38899919-38899860	NM_170604	Hs.130434
A_21_P0013072	3.60502	1.85001	3.60502	up	XLOC_l2_012925		FALSE	BROAD Institute lincRNA (XLOC_l2_012925), lincRNA [TCONS_l2_00024675]			27018431	chr6	26960361	-	hs|6p22.2		chr6:27018431-26960361
A_21_P0005619	5.73758	2.52044	5.73758	up	LOC101927815	uncharacterized LOC101927815	FALSE	Homo sapiens uncharacterized LOC101927815 (LOC101927815), transcript variant 1, long non-coding RNA [NR_125423]	101927815		2447140	chr8	2447081	-	hs|8p23.2	NR_125423	chr8:2447140-2447081	NR_125423	Hs.571468
A_21_P0008267	2.549	1.34993	2.549	up			FALSE	PREDICTED: Homo sapiens uncharacterized LOC102725228 (LOC102725228), ncRNA [XR_432949]			113342736	chr13	113342677	-	hs|13q34	XR_432949	chr13:113342736-113342677	XR_432949	Hs.41423
A_33_P3324454	2.23571	1.16073	2.23571	up	TPP1	tripeptidyl peptidase I	FALSE	Homo sapiens tripeptidyl peptidase I (TPP1), mRNA [NM_000391]	1200	GO:0006629|GO:0005515|GO:0004252|GO:0045453|GO:0005764|GO:0046872|GO:0030968|GO:0005739|GO:0030163|GO:0030855|GO:0006508|GO:0050885|GO:0008240|GO:0043171|GO:0043202|GO:0070062|GO:0042277|GO:0042470|GO:0007399|GO:0004175|GO:0008236|GO:0008233|GO:0006987|GO:0007040|GO:0044267	6636189	chr11	6636130	-	hs|11p15.4	NM_000391	chr11:6636189-6636130	NM_000391	Hs.523454
A_21_P0011016	2.02268	1.01627	2.02268	up	LOC643733	caspase 4, apoptosis-related cysteine peptidase pseudogene	FALSE		643733		104777733	chr11	104776255	-	hs|11q22.3		chr11:104777733-104776255
A_21_P0010184	2.08018	1.05671	2.08018	up			FALSE	AGENCOURT_10507300 NIH_MGC_127 Homo sapiens cDNA clone IMAGE:6698826 5', mRNA sequence [BU933671]			23029284	chr21	23027394	-	hs|21q21.1		chr21:23029284-23027394		Hs.580896
A_33_P3368540	2.01215	1.00874	2.01215	up	SRGAP3	SLIT-ROBO Rho GTPase activating protein 3	FALSE	SLIT-ROBO Rho GTPase activating protein 3 [Source:HGNC Symbol;Acc:HGNC:19744] [ENST00000490889]	9901	GO:0005515|GO:0051056|GO:0048365|GO:0030336|GO:0005737|GO:0007264|GO:0032855|GO:0030675|GO:0005829	9404584	chr3	9404525	-	hs|3p25.3	XR_249341	chr3:9404584-9404525	XR_249341
A_33_P3234472	2.45683	1.2968	2.45683	up	LINC01270	long intergenic non-protein coding RNA 1270	FALSE	Homo sapiens long intergenic non-protein coding RNA 1270 (LINC01270), long non-coding RNA [NR_034124]	284751		48931456	chr20	48931397	+	hs|20q13.13	NR_034124	chr20:48931397-48931456	NR_034124	Hs.282325
A_21_P0003266	2.86641	1.51925	2.86641	up	lnc-CHRD-1	lnc-CHRD-1:1	FALSE	LNCipedia lincRNA (lnc-CHRD-1), lincRNA [lnc-CHRD-1:1]			184096677	chr3	184096618	+	hs|3q27.1		chr3:184096618-184096677
A_24_P133253	2.02013	1.01444	2.02013	up	KITLG	KIT ligand	FALSE	Homo sapiens KIT ligand (KITLG), transcript variant b, mRNA [NM_000899]	4254	GO:0005515|GO:0033026|GO:0005886|GO:0008283|GO:0001755|GO:0050731|GO:0046579|GO:0005615|GO:0035234|GO:0005737|GO:0007173|GO:0043406|GO:0045636|GO:0007155|GO:0005856|GO:0035162|GO:0048011|GO:0048015|GO:0045740|GO:0005576|GO:0005125|GO:0097192|GO:0007165|GO:0008543|GO:0045087|GO:0002763|GO:0016021|GO:0008083|GO:0070668|GO:0005173|GO:0008584|GO:0038095	88886712	chr12	88886653	-	hs|12q21.32	NM_000899	chr12:88886712-88886653	NM_000899	Hs.1048
A_33_P3381762	2.65255	1.40738	2.65255	up			FALSE				4791816	chr19	4791757	-	hs|19p13.3		chr19:004791816-004791757
A_33_P3256888	3.74339	1.90434	3.74339	up			FALSE				67343602	chr9	67343543	-	hs|9q13		chr9:067343602-067343543
A_23_P78608	3.94531	1.98014	3.94531	up	DENND1C	DENN/MADD domain containing 1C	FALSE	Homo sapiens DENN/MADD domain containing 1C (DENND1C), transcript variant 1, mRNA [NM_024898]	79958	GO:0017112|GO:0030136|GO:0032851|GO:0005829	6467293	chr19	6467234	-	hs|19p13.3	NM_024898	chr19:6467293-6467234	NM_024898	Hs.236449
A_21_P0011889	2.38316	1.25287	2.38316	up	LOC101927187	uncharacterized LOC101927187	FALSE	PREDICTED: Homo sapiens uncharacterized LOC101927187 (LOC101927187), ncRNA [XR_241443]	101927187		242633574	chr2	242630054	+	hs|2q37.3		chr2:242630054-242633574	XR_241443	Hs.737722
A_33_P3298092	6.82643	2.77113	6.82643	up	LOC100131756	uncharacterized LOC100131756	FALSE	Homo sapiens cDNA FLJ38820 fis, clone LIVER2008473. [AK096139]	100131756		43707287	chr1	43707228	-	hs|1p34.2	AK096139	chr1:43707287-43707228		Hs.650461
A_19_P00321692	4.57186	2.19278	4.57186	up	LOC644838	uncharacterized LOC644838	FALSE		644838		67405075	chr2	67405016	-	hs|2p14		chr2:67405075-67405016
A_24_P48204	2.15232	1.10589	2.15232	up	SECTM1	secreted and transmembrane 1	FALSE	Homo sapiens secreted and transmembrane 1 (SECTM1), mRNA [NM_003004]	6398	GO:0007165|GO:0006955|GO:0005794|GO:0005886|GO:0007498|GO:0016021|GO:0004871|GO:0043123|GO:0005615|GO:0005125|GO:0070062	80279241	chr17	80279182	-	hs|17q25.3	NM_003004	chr17:80279241-80279182	NM_003004	Hs.558009
A_33_P3294415	7.09018	2.82582	7.09018	up			FALSE				16893550	chr17	16893491	+	hs|17p11.2		chr17:016893491-016893550
A_21_P0011758	2.53535	1.34218	2.53535	up	XLOC_l2_007097		FALSE	BROAD Institute lincRNA (XLOC_l2_007097), lincRNA [TCONS_l2_00013180]			51289021	chr19	51288962	-	hs|19q13.33		chr19:51289021-51288962
A_23_P342600	2.09358	1.06597	2.09358	up	STK35	serine/threonine kinase 35	FALSE	Homo sapiens serine/threonine kinase 35 (STK35), mRNA [NM_080836]	140901	GO:0005737|GO:0004674|GO:0005730|GO:0006468|GO:0005524	2097827	chr20	2097768	+	hs|20p13	NM_080836	chr20:2097768-2097827	NM_080836	Hs.100057
A_33_P3329104	2.15925	1.11053	2.15925	up			FALSE				7806703	chr19	7806644	+	hs|19p13.2		chr19:007806644-007806703
A_24_P64407	2.72457	1.44603	2.72457	up	HMX2	H6 family homeobox 2	FALSE	Homo sapiens H6 family homeobox 2 (HMX2), mRNA [NM_005519]	3167	GO:0048026|GO:0043565|GO:0008284|GO:0006355|GO:0042472|GO:0007420|GO:0005634|GO:0030154|GO:0006351	124909194	chr10	124909135	+	hs|10q26.13	NM_005519	chr10:124909135-124909194	NM_005519	Hs.444756
A_33_P3321796	3.68274	1.88078	3.68274	up			FALSE	DB153536 THYMU3 Homo sapiens cDNA clone THYMU3031175 5', mRNA sequence [DB153536]			3166134	chr11	3166075	-	hs|11p15.4	DB153536	chr11:3166134-3166075		Hs.719691
A_23_P16058	3.23721	1.69475	3.23721	up	ZNF296	zinc finger protein 296	FALSE	Homo sapiens zinc finger protein 296 (ZNF296), mRNA [NM_145288]	162979	GO:0003674|GO:0006355|GO:0005634|GO:0007283|GO:0005575|GO:0003677|GO:0046872|GO:0006351	45575588	chr19	45575529	-	hs|19q13.32	NM_145288	chr19:45575588-45575529	NM_145288	Hs.192237
A_21_P0011535	2.28505	1.19222	2.28505	up	LGALS9	lectin, galactoside-binding, soluble, 9	FALSE	lectin, galactoside-binding, soluble, 9 [Source:HGNC Symbol;Acc:HGNC:6570] [ENST00000584386]	3965	GO:0007165|GO:0005737|GO:0005534|GO:0030246|GO:0004871|GO:0043123|GO:0070062	25973575	chr17	25969369	+	hs|17q11.2	XM_006721895	chr17:25969369-25973575	XM_006721895
A_33_P3269844	2.31667	1.21205	2.31667	up	LRRC26	leucine rich repeat containing 26	FALSE	Homo sapiens leucine rich repeat containing 26 (LRRC26), mRNA [NM_001013653]	389816	GO:0005515|GO:0005737|GO:0008076|GO:0015459|GO:0005856|GO:0070062|GO:0006811	140063280	chr9	140063221	-	hs|9q34.3	NM_001013653	chr9:140063280-140063221	NM_001013653	Hs.669977
A_21_P0014350	2.02878	1.02061	2.02878	up	LOC102724532	uncharacterized LOC102724532	FALSE	PREDICTED: Homo sapiens uncharacterized LOC102724532 (LOC102724532), transcript variant X1, ncRNA [XR_424843]	102724532		45968886	chr17	45968827	-	hs|17q21.32	XR_424843	chr17:45968886-45968827	XR_424843
A_33_P3219240	2.02346	1.01682	2.02346	up	LOC642980	uncharacterized LOC642980	FALSE	Homo sapiens cDNA FLJ16523 fis, clone NT2RP8000521. [AK131413]	642980		149095487	chrX	149095428	-	hs|Xq28	AK131413	chrX:149095487-149095428		Hs.458216
A_33_P3300877	2.73809	1.45317	2.73809	up			FALSE				81012921	chr17	81012862	-	hs|17q25.3		chr17:081012921-081012862
A_21_P0008304	2.16214	1.11246	2.16214	up	lnc-FOXG1-6	lnc-FOXG1-6:7	FALSE	LNCipedia lincRNA (lnc-FOXG1-6), lincRNA [lnc-FOXG1-6:7]			27249810	chr14	27249751	+	hs|14q12		chr14:27249751-27249810
A_33_P3235184	2.52209	1.33462	2.52209	up			FALSE	ribosomal protein L9 pseudogene 2 [Source:HGNC Symbol;Acc:HGNC:17049] [ENST00000424673]			15347393	chr17	15347334	+	hs|17p12		chr17:15347334-15347393
A_33_P3589543	2.69898	1.43241	2.69898	up	lnc-RASSF7-1	lnc-RASSF7-1:1	FALSE	Homo sapiens cDNA FLJ36520 fis, clone TRACH2002100. [AK093839]			560104	chr11	560045	+	hs|11p15.5	AK093839	chr11:560045-560104		Hs.560022
A_33_P3502547	4.88247	2.28761	4.88247	up			FALSE	AGENCOURT_10612443 NIH_MGC_126 Homo sapiens cDNA clone IMAGE:6727802 5', mRNA sequence [BU955595]			172388034	chr5	172387975	+	hs|5q35.1	BU955595	chr5:172387975-172388034		Hs.430755
A_19_P00320387	3.23686	1.6946	3.23686	up	LINC01510	long intergenic non-protein coding RNA 1510	FALSE	long intergenic non-protein coding RNA 1510 [Source:HGNC Symbol;Acc:HGNC:51196] [ENST00000450063]	100996266		116211087	chr7	116211028	-	hs|7q31.2	XR_158832	chr7:116211087-116211028	XR_158832	Hs.607491
A_21_P0003674	6.76808	2.75875	6.76808	up	lnc-CLCN3-1	lnc-CLCN3-1:2	FALSE	LNCipedia lincRNA (lnc-CLCN3-1), lincRNA [lnc-CLCN3-1:2]			170861763	chr4	170861704	+	hs|4q33		chr4:170861704-170861763
A_33_P3273854	2.03125	1.02237	2.03125	up	NAALADL2	N-acetylated alpha-linked acidic dipeptidase-like 2	FALSE	Homo sapiens N-acetylated alpha-linked acidic dipeptidase-like 2 (NAALADL2), mRNA [NM_207015]	254827	GO:0016021	175523382	chr3	175523323	+	hs|3q26.31	NM_207015	chr3:175523323-175523382	NM_207015	Hs.660010
A_33_P3283669	2.52804	1.33802	2.52804	up	ATP1A3	ATPase, Na+/K+ transporting, alpha 3 polypeptide	FALSE	Homo sapiens ATPase, Na+/K+ transporting, alpha 3 polypeptide (ATP1A3), transcript variant 3, mRNA [NM_001256214]	478	GO:0008344|GO:0030424|GO:0005886|GO:0005783|GO:0051087|GO:0006883|GO:0045202|GO:0005634|GO:0046872|GO:0034220|GO:0031748|GO:0043209|GO:0007613|GO:0005391|GO:0005794|GO:0030007|GO:0042493|GO:0010107|GO:0086064|GO:0005890|GO:0055085|GO:0005524|GO:0031982|GO:0044327|GO:0044326|GO:0035235|GO:0071383|GO:0008542|GO:0008152|GO:0016021	42470805	chr19	42470746	-	hs|19q13.2	NM_001256214	chr19:42470805-42470746	NM_001256214	Hs.515427
A_24_P332218	7.98653	2.99757	7.98653	up	GPR149	G protein-coupled receptor 149	FALSE	Homo sapiens G protein-coupled receptor 149 (GPR149), mRNA [NM_001038705]	344758	GO:0043005|GO:0042923|GO:0007218|GO:0007187|GO:0005887|GO:0004930|GO:0060280|GO:0007268|GO:0001546|GO:0001547	154055959	chr3	154055900	-	hs|3q25.2	NM_001038705	chr3:154055959-154055900	NM_001038705	Hs.688231
A_24_P142503	2.19016	1.13103	2.19016	up	SLC47A1	solute carrier family 47 (multidrug and toxin extrusion), member 1	FALSE	Homo sapiens solute carrier family 47 (multidrug and toxin extrusion), member 1 (SLC47A1), mRNA [NM_018242]	55244	GO:0015695|GO:0005886|GO:0006855|GO:0031988|GO:0005451|GO:0016021|GO:0055085|GO:0015238	19481927	chr17	19481868	+	hs|17p11.2	NM_018242	chr17:19481868-19481927	NM_018242	Hs.232054
A_19_P00318860	2.00256	1.00185	2.00256	up	lnc-SNURF-1	lnc-SNURF-1:3	FALSE	LNCipedia lincRNA (lnc-SNURF-1), lincRNA [lnc-SNURF-1:3]			25265910	chr15	25265851	+	hs|15q11.2		chr15:25265851-25265910		Hs.728856
A_33_P3709327	2.32627	1.21802	2.32627	up	EPHA5-AS1	EPHA5 antisense RNA 1	FALSE	Homo sapiens EPHA5 antisense RNA 1 (EPHA5-AS1), long non-coding RNA [NR_034138]	100144602		66559103	chr4	66559044	+	hs|4q13.1	NR_034138	chr4:66559044-66559103	NR_034138	Hs.201854
A_33_P3376478	2.32072	1.21457	2.32072	up	CYP17A1	cytochrome P450, family 17, subfamily A, polypeptide 1	FALSE	Homo sapiens cytochrome P450, family 17, subfamily A, polypeptide 1 (CYP17A1), mRNA [NM_000102]	1586	GO:0030424|GO:0006694|GO:0006805|GO:0018963|GO:0030325|GO:0006702|GO:0005783|GO:0006704|GO:0018879|GO:0044281|GO:0051591|GO:0047442|GO:0005739|GO:0010034|GO:0071371|GO:0060992|GO:0010212|GO:0043025|GO:0031667|GO:0090031|GO:0007548|GO:0032526|GO:0018958|GO:0034097|GO:0071236|GO:0008202|GO:0005506|GO:0042493|GO:0009635|GO:0004508|GO:0048545|GO:0021766|GO:0018894|GO:0071222|GO:0051597|GO:0019825|GO:…	104590371	chr10	104590312	-	hs|10q24.32	NM_000102	chr10:104590371-104590312	NM_000102	Hs.438016
A_21_P0001677	3.64897	1.86749	3.64897	up	lnc-HPDL-1	lnc-HPDL-1:1	FALSE	LNCipedia lincRNA (lnc-HPDL-1), lincRNA [lnc-HPDL-1:1]			45683527	chr1	45672648	+	hs|1p34.1		chr1:45672648-45683527
A_23_P89101	2.77059	1.47019	2.77059	up	2019-09-12	septin 12	FALSE	Homo sapiens septin 12 (SEPT12), transcript variant 2, mRNA [NM_144605]	124404	GO:0005515|GO:0031105|GO:0001725|GO:0048471|GO:0097227|GO:0005819|GO:0030496|GO:0005525|GO:0032154|GO:0042803|GO:0007049|GO:0015630|GO:0019003|GO:0035091|GO:0051301	4827777	chr16	4827718	-	hs|16p13.3	NM_144605	chr16:4827777-4827718	NM_144605	Hs.126780
A_24_P401830	3.38515	1.75922	3.38515	up	MATN1-AS1	MATN1 antisense RNA 1	FALSE	Homo sapiens MATN1 antisense RNA 1 (MATN1-AS1), long non-coding RNA [NR_034182]	100129196		31199586	chr1	31199527	+	hs|1p35.2	NR_034182	chr1:31199527-31199586	NR_034182	Hs.659751
A_32_P131143	2.35231	1.23408	2.35231	up	CECR5-AS1	CECR5 antisense RNA 1	FALSE	Homo sapiens CECR5 antisense RNA 1 (CECR5-AS1), transcript variant 2, long non-coding RNA [NR_024482]	100130717		17646293	chr22	17646234	+	hs|22q11.1	NR_024482	chr22:17646234-17646293	NR_024482	Hs.660066
A_23_P390443	2.23241	1.1586	2.23241	up	SHISA7	shisa family member 7	FALSE	Homo sapiens shisa family member 7 (SHISA7), mRNA [NM_001145176]	729956	GO:0016021	55941121	chr19	55941062	-	hs|19q13.42	NM_001145176	chr19:55941121-55941062	NM_001145176	Hs.6664
A_23_P308021	2.06876	1.04876	2.06876	up	CABP4	calcium binding protein 4	FALSE	Homo sapiens calcium binding protein 4 (CABP4), transcript variant 1, mRNA [NM_145200]	57010	GO:0007165|GO:0046549|GO:0060040|GO:0043195|GO:0005509|GO:0045202|GO:0005576|GO:0007602|GO:0008594|GO:0007601|GO:0005829	67226140	chr11	67225969	+	hs|11q13.2	NM_145200	chr11:67225969-67226140	NM_145200	Hs.143036
A_21_P0003155	2.47041	1.30475	2.47041	up	LINC00635	long intergenic non-protein coding RNA 635	FALSE	Homo sapiens long intergenic non-protein coding RNA 635 (LINC00635), transcript variant 2, long non-coding RNA [NR_015414]	151658		107560939	chr3	107560880	-	hs|3q13.12	NR_015414	chr3:107560939-107560880	NR_015414	Hs.159043
A_21_P0002496	2.82363	1.49755	2.82363	up	lnc-CCDC93-3	lnc-CCDC93-3:1	FALSE	LNCipedia lincRNA (lnc-CCDC93-3), lincRNA [lnc-CCDC93-3:1]			118967047	chr2	118966988	-	hs|2q14.2		chr2:118967047-118966988
A_33_P3319231	3.62921	1.85966	3.62921	up	AIFM2	apoptosis-inducing factor, mitochondrion-associated, 2	FALSE	apoptosis-inducing factor, mitochondrion-associated, 2 [Source:HGNC Symbol;Acc:HGNC:21411] [ENST00000373248]	84883	GO:0005811|GO:0043065|GO:0050660|GO:0005741|GO:0003677|GO:0005615|GO:0005829|GO:0005739|GO:0005737|GO:0008637|GO:0004174|GO:0016021|GO:0008137|GO:0055114	71858227	chr10	71858168	-	hs|10q22.1	AF337957	chr10:71858227-71858168
A_23_P16652	2.02043	1.01466	2.02043	up	ZNF555	zinc finger protein 555	FALSE	Homo sapiens zinc finger protein 555 (ZNF555), transcript variant 1, mRNA [NM_152791]	148254	GO:0006355|GO:0005634|GO:0003677|GO:0046872|GO:0006351	2853999	chr19	2853940	+	hs|19p13.3	NM_152791	chr19:2853940-2853999	NM_152791	Hs.47712
A_33_P3242064	3.7248	1.89716	3.7248	up	OR5J2	olfactory receptor, family 5, subfamily J, member 2	FALSE	Homo sapiens olfactory receptor, family 5, subfamily J, member 2 (OR5J2), mRNA [NM_001005492]	282775	GO:0050911|GO:0004984|GO:0007186|GO:0005886|GO:0004930|GO:0016021	55945032	chr11	55944973	+	hs|11q12.1	NM_001005492	chr11:55944973-55945032	NM_001005492	Hs.537145
A_33_P3223678	6.39471	2.67688	6.39471	up	LHX3	LIM homeobox 3	FALSE	Homo sapiens LIM homeobox 3 (LHX3), transcript variant 2, mRNA [NM_014564]	8022	GO:0005667|GO:0048839|GO:0043066|GO:0006366|GO:0021521|GO:0030324|GO:0021520|GO:0021983|GO:0005634|GO:0001890|GO:0021527|GO:0021526|GO:0043565|GO:0008045|GO:0001076|GO:0045944|GO:0009887|GO:0008270|GO:0045893	139089230	chr9	139089171	-	hs|9q34.3	NM_014564	chr9:139089230-139089171	NM_014564	Hs.148427
A_21_P0008449	2.24375	1.16591	2.24375	up	lnc-MAX-2	lnc-MAX-2:2	FALSE	LNCipedia lincRNA (lnc-MAX-2), lincRNA [lnc-MAX-2:2]			65708938	chr14	65708879	-	hs|14q23.3		chr14:65708938-65708879
A_23_P1962	2.26443	1.17915	2.26443	up	RARRES3	retinoic acid receptor responder (tazarotene induced) 3	FALSE	Homo sapiens retinoic acid receptor responder (tazarotene induced) 3 (RARRES3), mRNA [NM_004585]	5920	GO:0016042|GO:0005515|GO:0008285|GO:0004623|GO:0016021|GO:0006644	63313886	chr11	63313827	+	hs|11q12.3	NM_004585	chr11:63313827-63313886	NM_004585	Hs.17466
A_23_P336796	2.11524	1.08082	2.11524	up	GXYLT1	glucoside xylosyltransferase 1	FALSE	Homo sapiens glucoside xylosyltransferase 1 (GXYLT1), transcript variant 1, mRNA [NM_173601]	283464	GO:0035252|GO:0000139|GO:0005975|GO:0009405|GO:0016266|GO:0044281|GO:0016021|GO:0030204|GO:0030203	42476664	chr12	42476605	-	hs|12q12	NM_173601	chr12:42476664-42476605	NM_173601	Hs.259347
A_21_P0010556	4.06745	2.02412	4.06745	up	XLOC_l2_000416		FALSE	BROAD Institute lincRNA (XLOC_l2_000416), lincRNA [TCONS_l2_00000578]			148950967	chr1	148933363	+	hs|1q21.2		chr1:148933363-148950967
A_21_P0007129	2.05979	1.04249	2.05979	up	LOC101929295	uncharacterized LOC101929295	FALSE	Homo sapiens uncharacterized LOC101929295 (LOC101929295), long non-coding RNA [NR_110303]	101929295		94892255	chr11	94892196	+	hs|11q21		chr11:94892196-94892255	NR_110303	Hs.735838
A_24_P29117	2.49832	1.32096	2.49832	up	SLC26A1	solute carrier family 26 (anion exchanger), member 1	FALSE	Homo sapiens solute carrier family 26 (anion exchanger), member 1 (SLC26A1), transcript variant 2, mRNA [NM_134425]	10861	GO:0006821|GO:0006805|GO:0050427|GO:0019531|GO:0005886|GO:0050428|GO:0005975|GO:0019532|GO:0044281|GO:0055085|GO:0015116|GO:0005887|GO:0015108|GO:0015301|GO:0008272|GO:0009405|GO:0008271|GO:0016021|GO:0030203|GO:0006811	973280	chr4	973221	-	hs|4p16.3	NM_134425	chr4:973280-973221	NM_134425	Hs.658244
A_21_P0007437	2.87191	1.52201	2.87191	up	LOC101927495	uncharacterized LOC101927495	FALSE	Homo sapiens uncharacterized LOC101927495 (LOC101927495), long non-coding RNA [NR_110189]	101927495		61373457	chr11	61373398	+	hs|11q12.2	NR_110189	chr11:61373398-61373457	NR_110189	Hs.553866
A_21_P0010066	2.7178	1.44244	2.7178	up	lnc-ANKRD60-1	lnc-ANKRD60-1:1	FALSE	LNCipedia lincRNA (lnc-ANKRD60-1), lincRNA [lnc-ANKRD60-1:1]			56739245	chr20	56739186	-	hs|20q13.32		chr20:56739245-56739186
A_21_P0011521	2.63534	1.39799	2.63534	up	XLOC_l2_005692		FALSE	BROAD Institute lincRNA (XLOC_l2_005692), lincRNA [TCONS_l2_00010602]			19497818	chr17	19497759	+	hs|17p11.2		chr17:19497759-19497818
A_21_P0009966	3.15549	1.65786	3.15549	up	lnc-ARFGEF2-4	lnc-ARFGEF2-4:1	FALSE	LNCipedia lincRNA (lnc-ARFGEF2-4), lincRNA [lnc-ARFGEF2-4:1]			46974720	chr20	46974661	+	hs|20q13.13		chr20:46974661-46974720
A_33_P3286157	2.05318	1.03786	2.05318	up	TNFRSF4	tumor necrosis factor receptor superfamily, member 4	FALSE	Homo sapiens tumor necrosis factor receptor superfamily, member 4 (TNFRSF4), mRNA [NM_003327]	7293	GO:0045859|GO:0009986|GO:0030890|GO:0042981|GO:0050710|GO:0033209|GO:0043433|GO:0006955|GO:0006968|GO:0005031|GO:0006954|GO:0042098|GO:0005887|GO:0051024|GO:0045892|GO:0009897	1146781	chr1	1146722	-	hs|1p36.33	NM_003327	chr1:1146781-1146722	NM_003327	Hs.129780
A_33_P3510508	11.0657	3.46802	11.0657	up			FALSE
A_23_P141624	2.46785	1.30325	2.46785	up	KRTAP1-1	keratin associated protein 1-1	FALSE	Homo sapiens keratin associated protein 1-1 (KRTAP1-1), mRNA [NM_030967]	81851	GO:0008150|GO:0045095	39196937	chr17	39196878	-	hs|17q21.2	NM_030967	chr17:39196937-39196878	NM_030967	Hs.247934
A_23_P424734	2.3269	1.21841	2.3269	up	EXOC3L1	exocyst complex component 3-like 1	FALSE	Homo sapiens exocyst complex component 3-like 1 (EXOC3L1), mRNA [NM_178516]	283849	GO:0030133|GO:0003674|GO:0000145|GO:0051601|GO:0000149|GO:0030141|GO:0030072|GO:0006887	67218599	chr16	67218459	-	hs|16q22.1	NM_178516	chr16:67218599-67218459	NM_178516	Hs.647356
A_33_P3289236	8.74314	3.12815	8.74314	up	HPR	haptoglobin-related protein	FALSE	Homo sapiens haptoglobin-related protein (HPR), mRNA [NM_020995]	3250	GO:0030492|GO:0008152|GO:0034366|GO:0072562|GO:0005576|GO:0003824|GO:0006898|GO:0070062	72110943	chr16	72110884	+	hs|16q22.2	NM_020995	chr16:72110884-72110943	NM_020995	Hs.655361
A_33_P3235204	2.41011	1.2691	2.41011	up	ELMOD3	ELMO/CED-12 domain containing 3	FALSE	Homo sapiens ELMO/CED-12 domain containing 3 (ELMOD3), transcript variant 1, mRNA [NM_032213]	84173	GO:0006909|GO:0060091|GO:0005737|GO:0032420|GO:0005856|GO:0005096	85617621	chr2	85617562	+	hs|2p11.2	NM_032213	chr2:85617562-85617621	NM_032213	Hs.269990
A_33_P3407374	2.5267	1.33725	2.5267	up			FALSE				28966479	chr10	28966420	-	hs|10p12.1		chr10:028966479-028966420
A_21_P0007241	9.04573	3.17724	9.04573	up	lnc-USP35-1	lnc-USP35-1:1	FALSE	LNCipedia lincRNA (lnc-USP35-1), lincRNA [lnc-USP35-1:1]			77852796	chr11	77852737	+	hs|11q14.1		chr11:77852737-77852796		Hs.719003
A_33_P3222630	2.08318	1.05879	2.08318	up	FBXO43	F-box protein 43	FALSE	Homo sapiens F-box protein 43 (FBXO43), transcript variant 2, mRNA [NM_001029860]	286151	GO:0051321|GO:0016567|GO:0042177|GO:0008270|GO:0005634|GO:0045835	101146035	chr8	101145976	-	hs|8q22.2	NM_001029860	chr8:101146035-101145976	NM_001029860	Hs.339577
A_21_P0006850	2.2034	1.13973	2.2034	up	lnc-LYZL1-2	lnc-LYZL1-2:1	FALSE	LNCipedia lincRNA (lnc-LYZL1-2), lincRNA [lnc-LYZL1-2:1]			29524859	chr10	29524800	+	hs|10p12.1		chr10:29524800-29524859
A_19_P00801088	2.40332	1.26503	2.40332	up	ANKRD20A12P	ankyrin repeat domain 20 family, member A12, pseudogene	FALSE	Homo sapiens ankyrin repeat domain 20 family, member A12, pseudogene (ANKRD20A12P), non-coding RNA [NR_046228]	100874392		142697485	chr1	142697426	-	hs|1q21.1	NR_046228	chr1:142697485-142697426	NR_046228	Hs.648245
A_21_P0010084	2.39019	1.25712	2.39019	up	LOC100270804	uncharacterized LOC100270804	FALSE	Homo sapiens uncharacterized LOC100270804 (LOC100270804), long non-coding RNA [NR_026885]	100270804		18776236	chr20	18776177	+	hs|20p11.23	NR_026885	chr20:18776177-18776236	NR_026885	Hs.598768
A_19_P00813352	2.27121	1.18346	2.27121	up	lnc-DYM-1	lnc-DYM-1:1	FALSE	LNCipedia lincRNA (lnc-DYM-1), lincRNA [lnc-DYM-1:1]			46521362	chr18	46521303	-	hs|18q21.1		chr18:46521362-46521303
A_23_P55779	2.92811	1.54997	2.92811	up	CYP2A13	cytochrome P450, family 2, subfamily A, polypeptide 13	FALSE	Homo sapiens cytochrome P450, family 2, subfamily A, polypeptide 13 (CYP2A13), mRNA [NM_000766]	1553	GO:0008392|GO:0006805|GO:0070330|GO:0005506|GO:0008395|GO:0019373|GO:0009804|GO:0044281|GO:0043231|GO:0005737|GO:0019825|GO:0042738|GO:0005789|GO:0016712|GO:0055114|GO:0020037	41601793	chr19	41601734	+	hs|19q13.2	NM_000766	chr19:41601734-41601793	NM_000766	Hs.567252
A_33_P3297452	2.50389	1.32417	2.50389	up			FALSE	ribosomal protein L23a pseudogene 76 [Source:HGNC Symbol;Acc:HGNC:36555] [ENST00000441860]			14851322	chr17	14851263	-	hs|17p12		chr17:14851322-14851263
A_33_P3241334	3.02804	1.59839	3.02804	up	PSG9	pregnancy specific beta-1-glycoprotein 9	FALSE	pregnancy specific beta-1-glycoprotein 9 [Source:HGNC Symbol;Acc:HGNC:9526] [ENST00000595404]	5678	GO:0007565|GO:0005576	43764581	chr19	43764522	-	hs|19q13.31	AK056754	chr19:43764581-43764522		Hs.709192
A_33_P3352687	3.78578	1.92059	3.78578	up	LINC01001	long intergenic non-protein coding RNA 1001	FALSE	Homo sapiens long intergenic non-protein coding RNA 1001 (LINC01001), long non-coding RNA [NR_028326]	100133161		128915	chr11	128856	-	hs|11p15.5	NR_028326	chr11:128915-128856	NR_028326	Hs.645398
A_21_P0002489	17.5112	4.13021	17.5112	up	lnc-EDAR-1	lnc-EDAR-1:1	FALSE	LNCipedia lincRNA (lnc-EDAR-1), lincRNA [lnc-EDAR-1:1]			109685058	chr2	109684999	-	hs|2q12.3		chr2:109685058-109684999
A_33_P3418566	9.64077	3.26915	9.64077	up	LINC01080	long intergenic non-protein coding RNA 1080	FALSE	Homo sapiens long intergenic non-protein coding RNA 1080 (LINC01080), long non-coding RNA [NR_104138]	101515984		80600798	chr13	80600739	+	hs|13q31.1	NR_104138	chr13:80600739-80600798	NR_104138	Hs.569290
A_21_P0012839	2.7961	1.48342	2.7961	up	XLOC_l2_011692		FALSE	BROAD Institute lincRNA (XLOC_l2_011692), lincRNA [TCONS_l2_00022450]			98297278	chr5	98297219	+	hs|5q21.1		chr5:98297219-98297278
A_33_P3278033	10.0614	3.33076	10.0614	up	TUSC1	tumor suppressor candidate 1	FALSE	Homo sapiens tumor suppressor candidate 1 (TUSC1), mRNA [NM_001004125]	286319		25677740	chr9	25677681	-	hs|9p21.2	NM_001004125	chr9:25677740-25677681	NM_001004125	Hs.26268
A_19_P00316479	2.18002	1.12434	2.18002	up	LOC100422737	uncharacterized LOC100422737	FALSE	Homo sapiens cDNA FLJ41422 fis, clone BRHIP2003048. [AK123416]	100422737		107218599	chr6	107218540	-	hs|6q21		chr6:107218599-107218540		Hs.729217
A_19_P00315633	2.57323	1.36358	2.57323	up	LOC101927668	uncharacterized LOC101927668	FALSE	Homo sapiens uncharacterized LOC101927668 (LOC101927668), long non-coding RNA [NR_110114]	101927668		19958800	chr7	19958741	-	hs|7p21.1		chr7:19958800-19958741	NR_110114
A_21_P0007787	2.31485	1.21092	2.31485	up	LINC00944	long intergenic non-protein coding RNA 944	FALSE	Homo sapiens long intergenic non-protein coding RNA 944 (LINC00944), long non-coding RNA [NR_033878]	387895		127215304	chr12	127215247	-	hs|12q24.32	NR_033878	chr12:127215304-127215247	NR_033878	Hs.534660
A_21_P0004748	5.60365	2.48637	5.60365	up			FALSE				43705491	chr6	43696989	-	hs|6p21.1		chr6:43705491-43696989
A_19_P00320930	2.42378	1.27726	2.42378	up			FALSE	ATPE_BUCBP (Q89B38) ATP synthase epsilon chain (ATP synthase F1 sector epsilon subunit) , partial (13%) [THC2624251]			149102267	chr3	149102208	-	hs|3q25.1		chr3:149102267-149102208
A_21_P0012284	2.91598	1.54398	2.91598	up			FALSE	sphingomyelin phosphodiesterase 4, neutral membrane (neutral sphingomyelinase-3) pseudogene 1 [Source:HGNC Symbol;Acc:HGNC:39673] [ENST00000416717]			20957057	chr22	20956998	-	hs|22q11.21		chr22:20957057-20956998
A_21_P0005727	2.2036	1.13986	2.2036	up	LINC01111	long intergenic non-protein coding RNA 1111	FALSE	Homo sapiens long intergenic non-protein coding RNA 1111 (LINC01111), long non-coding RNA [NR_105006]	101926978		77436562	chr8	77436503	+	hs|8q21.11	NR_105006	chr8:77436503-77436562	NR_105006	Hs.615028
A_21_P0006782	2.37847	1.25003	2.37847	up	lnc-MYOF-1	lnc-MYOF-1:1	FALSE	LNCipedia lincRNA (lnc-MYOF-1), lincRNA [lnc-MYOF-1:1]			94819502	chr10	94819443	-	hs|10q23.33		chr10:94819502-94819443
A_33_P3324949	2.27706	1.18717	2.27706	up	IGF2BP2-AS1	IGF2BP2 antisense RNA 1	FALSE	Homo sapiens cDNA FLJ32900 fis, clone TESTI2005492. [AK057462]	646600		185435954	chr3	185435895	+	hs|3q27.2	AK057462	chr3:185435895-185435954		Hs.647949
A_23_P253692	2.18472	1.12745	2.18472	up	GPR64	G protein-coupled receptor 64	FALSE	Homo sapiens G protein-coupled receptor 64 (GPR64), transcript variant 1, mRNA [NM_001079858]	10149	GO:0016324|GO:0009986|GO:0007186|GO:0005887|GO:0004930|GO:0016021|GO:0007283|GO:0070062	19007638	chrX	19007579	-	hs|Xp22.13	NM_001079858	chrX:19007638-19007579	NM_001079858	Hs.146978
A_33_P3414017	6.41347	2.68111	6.41347	up			FALSE				2299301	chr7	2299242	+	hs|7p22.3		chr7:002299242-002299301
A_33_P3360814	3.07517	1.62067	3.07517	up	NFE4	nuclear factor, erythroid 4	FALSE	Homo sapiens nuclear factor, erythroid 4 (NFE4), mRNA [NM_001085386]	58160	GO:0006355|GO:0005634|GO:0006351	102616676	chr7	102616617	+	hs|7q22.1	NM_001085386	chr7:102616617-102616676	NM_001085386
A_23_P147900	3.81613	1.93211	3.81613	up	POU6F2	POU class 6 homeobox 2	FALSE	Homo sapiens POU class 6 homeobox 2 (POU6F2), transcript variant 1, mRNA [NM_007252]	11281	GO:0006355|GO:0003700|GO:0006366|GO:0007402|GO:0005634|GO:0007417|GO:0007601|GO:0003677	39504314	chr7	39504255	+	hs|7p14.1	NM_007252	chr7:39504255-39504314	NM_007252	Hs.137106
A_23_P394567	2.19338	1.13315	2.19338	up	KIAA1467	KIAA1467	FALSE	Homo sapiens KIAA1467 (KIAA1467), mRNA [NM_020853]	57613	GO:0016021	13236184	chr12	13236125	+	hs|12p13.1	NM_020853	chr12:13236125-13236184	NM_020853	Hs.132660
A_23_P397120	3.41101	1.7702	3.41101	up	SMIM24	small integral membrane protein 24	FALSE	Homo sapiens small integral membrane protein 24 (SMIM24), mRNA [NM_001136503]	284422	GO:0008150|GO:0003674|GO:0016021|GO:0070062	3474882	chr19	3474823	-	hs|19p13.3	NM_001136503	chr19:3474882-3474823	NM_001136503	Hs.130714
A_33_P3417176	2.50481	1.3247	2.50481	up	lnc-DTYMK-3	lnc-DTYMK-3:1	FALSE	LNCipedia lincRNA (lnc-DTYMK-3), lincRNA [lnc-DTYMK-3:1]			242674189	chr2	242674130	-	hs|2q37.3		chr2:242674189-242674130
A_33_P3394465	39.4096	5.30048	39.4096	up	PROP1	PROP paired-like homeobox 1	FALSE	Homo sapiens PROP paired-like homeobox 1 (PROP1), mRNA [NM_006261]	5626	GO:0005515|GO:0005667|GO:0043066|GO:0001568|GO:0008013|GO:0021979|GO:0005634|GO:0000122|GO:0009953|GO:0007417|GO:0008022|GO:0060126|GO:0043565|GO:0048850|GO:0016477|GO:0045944|GO:0003682|GO:0060070	177419295	chr5	177419236	-	hs|5q35.3	NM_006261	chr5:177419295-177419236	NM_006261	Hs.158301
A_32_P100109	3.23865	1.69539	3.23865	up	REPS2	RALBP1 associated Eps domain containing 2	FALSE	Homo sapiens RALBP1 associated Eps domain containing 2 (REPS2), transcript variant 1, mRNA [NM_004726]	9185	GO:0005515|GO:0005737|GO:0006461|GO:0007173|GO:0005509	17170865	chrX	17170806	+	hs|Xp22.13	NM_004726	chrX:17170806-17170865	NM_004726	Hs.186810
A_23_P216052	2.85582	1.51391	2.85582	up	FAM83A	family with sequence similarity 83, member A	FALSE	Homo sapiens family with sequence similarity 83, member A (FAM83A), transcript variant 1, mRNA [NM_032899]	84985		124220413	chr8	124220354	+	hs|8q24.13	NM_032899	chr8:124220354-124220413	NM_032899	Hs.379821
A_33_P3213089	2.11207	1.07866	2.11207	up			FALSE	sorting nexin 18 pseudogene 3 [Source:HGNC Symbol;Acc:HGNC:39611] [ENST00000565670]			38566457	chr9	38566398	-	hs|9p13.1		chr9:38566457-38566398		Hs.724217
A_33_P3351999	3.12165	1.64231	3.12165	up			FALSE	XM_363028 predicted protein {Magnaporthe grisea 70-15} (exp=0; wgp=1; cg=0), partial (4%) [THC2642375]			52043718	chr14	52043659	+	hs|14q22.1		chr14:052043659-052043718
A_19_P00316164	2.29582	1.19901	2.29582	up	LOC101928858	uncharacterized LOC101928858	FALSE	PREDICTED: Homo sapiens uncharacterized LOC101928858 (RP11-434D9.1), transcript variant X2, ncRNA [XR_425858]	101928858		67093414	chr5	67093355	+	hs|5q13.1	XR_425858	chr5:67093355-67093414	XR_425858
A_33_P3413667	2.99784	1.58392	2.99784	up	ABL2	ABL proto-oncogene 2, non-receptor tyrosine kinase	FALSE	Homo sapiens ABL proto-oncogene 2, non-receptor tyrosine kinase (ABL2), transcript variant e, mRNA [NM_001136001]	27	GO:0005515|GO:0006909|GO:0051353|GO:0071300|GO:0046632|GO:2000145|GO:2000096|GO:0030155|GO:2000249|GO:0051015|GO:0007173|GO:0007411|GO:0030100|GO:0042127|GO:0050885|GO:0070374|GO:0043123|GO:0038083|GO:0051017|GO:0035640|GO:0022408|GO:0000287|GO:0021587|GO:0018108|GO:0001891|GO:0030027|GO:0031234|GO:0097062|GO:0008542|GO:0045087|GO:0010976|GO:0010506|GO:0035024|GO:0015629|GO:0007204|GO:0005829|GO:…	179079775	chr1	179079716	-	hs|1q25.2	NM_001136001	chr1:179079775-179079716	NM_001136001	Hs.159472
A_21_P0000238	2.04631	1.03302	2.04631	up	SNORD12C	small nucleolar RNA, C/D box 12C	FALSE	Homo sapiens small nucleolar RNA, C/D box 12C (SNORD12C), small nucleolar RNA [NR_002433]	26765		47895560	chr20	47895501	+	hs|20q13.13	NR_002433	chr20:47895501-47895560	NR_002433	Hs.722986
A_21_P0006814	2.81605	1.49367	2.81605	up	lnc-PFKP-8	lnc-PFKP-8:1	FALSE	LNCipedia lincRNA (lnc-PFKP-8), lincRNA [lnc-PFKP-8:1]			3731051	chr10	3730992	+	hs|10p15.2		chr10:3730992-3731051
A_19_P00316341	2.00981	1.00706	2.00981	up	LOC100506860	uncharacterized LOC100506860	FALSE	Homo sapiens uncharacterized LOC100506860 (LOC100506860), long non-coding RNA [NR_109780]	100506860		130606642	chr7	130606583	+	hs|7q32.3		chr7:130606583-130606642	NR_109780	Hs.635013
A_33_P3340862	2.67799	1.42115	2.67799	up	TMEM88B	transmembrane protein 88B	FALSE	Homo sapiens transmembrane protein 88B (TMEM88B), mRNA [NM_001146685]	643965	GO:0016021	1363107	chr1	1363048	+	hs|1p36.33	NM_001146685	chr1:1363048-1363107	NM_001146685	Hs.729765
A_21_P0013310	2.26829	1.1816	2.26829	up	XLOC_l2_013849		FALSE	BROAD Institute lincRNA (XLOC_l2_013849), lincRNA [TCONS_l2_00026595]			57277559	chr7	57277500	-	hs|7p11.2		chr7:57277559-57277500
A_32_P212897	2.14931	1.10387	2.14931	up	LOC643406	uncharacterized LOC643406	FALSE	Homo sapiens uncharacterized LOC643406 (LOC643406), long non-coding RNA [NR_029405]	643406		5454777	chr20	5454718	+	hs|20p12.3	NR_029405	chr20:5454718-5454777	NR_029405	Hs.431161
A_32_P61684	2.61689	1.38785	2.61689	up	PAG1	phosphoprotein membrane anchor with glycosphingolipid microdomains 1	FALSE	Homo sapiens phosphoprotein membrane anchor with glycosphingolipid microdomains 1 (PAG1), mRNA [NM_018440]	55824	GO:0005515|GO:0050852|GO:0050863|GO:0005886|GO:0050868|GO:0009967|GO:0035556|GO:0007165|GO:0007173|GO:0005070|GO:0045121|GO:0016021|GO:0042169	81880292	chr8	81880233	-	hs|8q21.13	NM_018440	chr8:81880292-81880233	NM_018440	Hs.266175
A_19_P00319800	2.32504	1.21725	2.32504	up	LOC100287225	uncharacterized LOC100287225	FALSE	Homo sapiens uncharacterized LOC100287225 (LOC100287225), transcript variant 1, long non-coding RNA [NR_040074]	100287225		49087611	chr18	49087552	+	hs|18q21.2	NR_040074	chr18:49087552-49087611	NR_040074	Hs.715487
A_33_P3326568	3.67307	1.87699	3.67307	up	GLIS3	GLIS family zinc finger 3	FALSE	GLIS family zinc finger 3 [Source:HGNC Symbol;Acc:HGNC:28510] [ENST00000467497]	169792	GO:0001078|GO:0001077|GO:0005794|GO:0006366|GO:0045944|GO:0005654|GO:0005634|GO:0000122|GO:0000978|GO:0046872	3855540	chr9	3855481	-	hs|9p24.2	DQ438879	chr9:3855540-3855481		Hs.162125
A_21_P0000155	2.01878	1.01348	2.01878	up	PSMC2	proteasome (prosome, macropain) 26S subunit, ATPase, 2	FALSE	Homo sapiens proteasome (prosome, macropain) 26S subunit, ATPase, 2 (PSMC2), transcript variant 2, mRNA [NM_001204453]	5701	GO:0005515|GO:0002474|GO:0006511|GO:0010467|GO:0090263|GO:0005634|GO:0044281|GO:0031145|GO:0005829|GO:0034641|GO:0005737|GO:0000082|GO:0000932|GO:0016032|GO:0090090|GO:0016887|GO:0006977|GO:0000209|GO:0043066|GO:0000502|GO:0006521|GO:0051437|GO:0042590|GO:0006915|GO:0042981|GO:0051436|GO:0005524|GO:0051439|GO:0001649|GO:0016020|GO:0002479|GO:0005654|GO:0022624|GO:0000278	103002870	chr7	103002811	+	hs|7q22.1	NM_001204453	chr7:103002811-103002870	NM_001204453	Hs.437366
A_32_P232214	2.01003	1.00722	2.01003	up	TRABD2B	TraB domain containing 2B	FALSE	Homo sapiens TraB domain containing 2B (TRABD2B), mRNA [NM_001194986]	388630	GO:0005515|GO:0017147|GO:0031301|GO:0005887|GO:0018158|GO:0008152|GO:0030178|GO:0006508|GO:0016055|GO:0004222|GO:0046872|GO:0070062	48231388	chr1	48231329	-	hs|1p33	NM_001194986	chr1:48231388-48231329	NM_001194986	Hs.61504
A_33_P3313065	3.41372	1.77135	3.41372	up	OR5C1	olfactory receptor, family 5, subfamily C, member 1	FALSE	Homo sapiens olfactory receptor, family 5, subfamily C, member 1 (OR5C1), mRNA [NM_001001923]	392391	GO:0050911|GO:0004984|GO:0007186|GO:0005886|GO:0004930|GO:0016021	125552121	chr9	125552062	+	hs|9q33.2	NM_001001923	chr9:125552062-125552121	NM_001001923	Hs.534761
A_21_P0014732	2.17044	1.11799	2.17044	up			FALSE	chromosome 7 open reading frame 73 [Source:HGNC Symbol;Acc:HGNC:41909] [ENST00000422968]			135378152	chr7	135378093	+	hs|7q33	XR_250281	chr7:135378093-135378152	XR_250281	Hs.200022
A_23_P144656	2.55642	1.35413	2.55642	up	CDH10	cadherin 10, type 2 (T2-cadherin)	FALSE	Homo sapiens cadherin 10, type 2 (T2-cadherin) (CDH10), mRNA [NM_006727]	1008	GO:0016337|GO:0005886|GO:0034329|GO:0005509|GO:0016021|GO:0007156|GO:0045216|GO:0034332	24487499	chr5	24487440	-	hs|5p14.2	NM_006727	chr5:24487499-24487440	NM_006727	Hs.92489
A_23_P56347	2.16637	1.11528	2.16637	up	PSG3	pregnancy specific beta-1-glycoprotein 3	FALSE	Homo sapiens pregnancy specific beta-1-glycoprotein 3 (PSG3), mRNA [NM_021016]	5671	GO:0007565|GO:0006952|GO:0005576	43226189	chr19	43226130	-	hs|19q13.2	NM_021016	chr19:43226189-43226130	NM_021016	Hs.654413
A_23_P145895	2.27031	1.18289	2.27031	up	TP53TG1	TP53 target 1 (non-protein coding)	FALSE	Homo sapiens TP53 target 1 (non-protein coding) (TP53TG1), long non-coding RNA [NR_015381]	11257	GO:0003674|GO:0006950|GO:0006974	86954730	chr7	86954671	-	hs|7q21.12	NR_015381	chr7:86954730-86954671	NR_015381	Hs.274329
A_23_P5654	2.15893	1.11032	2.15893	up	IL37	interleukin 37	FALSE	Homo sapiens interleukin 37 (IL37), transcript variant 1, mRNA [NM_014439]	27178	GO:0006955|GO:0005737|GO:0005149|GO:0006954|GO:0019221|GO:0005730|GO:0005654|GO:0005634|GO:0005576|GO:0005615|GO:0005125|GO:0005829	113676308	chr2	113676249	+	hs|2q13	NM_014439	chr2:113676249-113676308	NM_014439	Hs.166371
A_21_P0010367	4.01853	2.00667	4.01853	up			FALSE				48257811	chr22	48257752	+	hs|22q13.31		chr22:48257752-48257811
A_33_P3381292	2.44211	1.28813	2.44211	up			FALSE				69924387	chr11	69924328	+	hs|11q13.3		chr11:069924328-069924387
A_24_P50437	2.06356	1.04513	2.06356	up			FALSE	ribosomal protein S3a pseudogene 49 [Source:HGNC Symbol;Acc:HGNC:36810] [ENST00000472161]			57817089	chr18	57817028	+	hs|18q21.32	BC065737	chr18:57817028-57817089		Hs.626174
A_33_P3301221	2.35242	1.23415	2.35242	up	MORN1	MORN repeat containing 1	FALSE	Homo sapiens MORN repeat containing 1 (MORN1), transcript variant 3, non-coding RNA [NR_125361]	79906		2306367	chr1	2306308	-	hs|1p36.32	NR_125361	chr1:2306367-2306308	NR_125361	Hs.642701
A_33_P3391517	2.22371	1.15297	2.22371	up	SNX22	sorting nexin 22	FALSE	sorting nexin 22 [Source:HGNC Symbol;Acc:HGNC:16315] [ENST00000560945]	79856	GO:0035091|GO:0015031|GO:0030659	64446228	chr15	64446169	+	hs|15q22.31	XM_005254677	chr15:64446169-64446228	XM_005254677	Hs.744250
A_32_P230148	2.60796	1.38292	2.60796	up			FALSE				171045303	chr6	171045261	-	hs|6q27		chr6:171045303-171045261
A_33_P3234031	2.24991	1.16987	2.24991	up	lnc-TBC1D29-1	lnc-TBC1D29-1:1	FALSE	Homo sapiens cDNA FLJ43993 fis, clone TESTI4020102. [AK125981]			28905049	chr17	28904990	+	hs|17q11.2	AK125981	chr17:28904990-28905049
A_33_P3404123	3.86382	1.95003	3.86382	up	KRTAP9-7	keratin associated protein 9-7	FALSE	Homo sapiens keratin associated protein 9-7 (KRTAP9-7), mRNA [NM_001277332]	100505724	GO:0045095	39432333	chr17	39432274	+	hs|17q21.2	NM_001277332	chr17:39432274-39432333	NM_001277332
A_21_P0012599	2.28559	1.19257	2.28559	up	lnc-BMP2K-1	lnc-BMP2K-1:8	FALSE	LNCipedia lincRNA (lnc-BMP2K-1), lincRNA [lnc-BMP2K-1:8]			80165838	chr4	80132901	+	hs|4q21.21		chr4:80132901-80165838
A_33_P3260362	7.27369	2.86269	7.27369	up			FALSE	olfactory receptor, family 6, subfamily J, member 1 (gene/pseudogene) [Source:HGNC Symbol;Acc:HGNC:14707] [ENST00000540461]			23102786	chr14	23102727	-	hs|14q11.2		chr14:23102786-23102727
A_33_P3377399	2.147	1.10232	2.147	up	lnc-RP11-778D12.2.1-4	lnc-RP11-778D12.2.1-4:5	FALSE	LNCipedia lincRNA (lnc-RP11-778D12.2.1-4), lincRNA [lnc-RP11-778D12.2.1-4:5]			106810426	chr8	106810367	-	hs|8q23.1		chr8:106810426-106810367
A_24_P462899	2.60234	1.37981	2.60234	up	CENPW	centromere protein W	FALSE	Homo sapiens centromere protein W (CENPW), transcript variant 2, mRNA [NM_001012507]	387103	GO:0005515|GO:0051276|GO:0046982|GO:0005730|GO:0006334|GO:0003677|GO:0016363|GO:0034080|GO:0007067|GO:0051382|GO:0007059|GO:0000777|GO:0000776|GO:0005654|GO:0000278|GO:0000775|GO:0051301	126669682	chr6	126669623	+	hs|6q22.32	NM_001012507	chr6:126669623-126669682	NM_001012507	Hs.486401
A_21_P0004121	2.4169	1.27316	2.4169	up			FALSE				33520050	chr5	33519991	-	hs|5p13.3		chr5:33520050-33519991
A_23_P216361	2.23907	1.1629	2.23907	up	COL14A1	collagen, type XIV, alpha 1	FALSE	Homo sapiens collagen, type XIV, alpha 1 (COL14A1), mRNA [NM_021110]	7373	GO:0003229|GO:0005581|GO:0005518|GO:0005578|GO:0005596|GO:0005576|GO:0005614|GO:0005615|GO:0061050|GO:0031012|GO:0016337|GO:0048873|GO:0022617|GO:0030198|GO:0030199|GO:0030574|GO:0005788|GO:0030674|GO:0070062|GO:0005201	121383707	chr8	121383648	+	hs|8q24.12	NM_021110	chr8:121383648-121383707	NM_021110	Hs.409662
A_33_P3232504	2.282	1.1903	2.282	up	CYSRT1	cysteine-rich tail protein 1	FALSE	Homo sapiens cysteine-rich tail protein 1 (CYSRT1), mRNA [NM_199001]	375791	GO:0070062	140120757	chr9	140120698	+	hs|9q34.3	NM_199001	chr9:140120698-140120757	NM_199001	Hs.512469
A_23_P200741	2.41598	1.27261	2.41598	up	DPT	dermatopontin	FALSE	Homo sapiens dermatopontin (DPT), mRNA [NM_001937]	1805	GO:0031012|GO:0008285|GO:0030199|GO:0005578|GO:0007155|GO:0005615|GO:0070062	168664807	chr1	168664748	-	hs|1q24.2	NM_001937	chr1:168664807-168664748	NM_001937	Hs.80552
A_33_P3213392	3.95989	1.98546	3.95989	up			FALSE	Q5T400_HUMAN (Q5T400) OTTHUMP00000018721, partial (95%) [THC2752485]			112278455	chr13	112278396	+	hs|13q34		chr13:112278396-112278455
A_23_P139795	2.03662	1.02618	2.03662	up	MSI1	musashi RNA-binding protein 1	FALSE	Homo sapiens musashi RNA-binding protein 1 (MSI1), mRNA [NM_002442]	4440	GO:0008266|GO:0005737|GO:0000166|GO:0003723|GO:0030855|GO:0005634|GO:0009725|GO:0005844|GO:0007399	120780269	chr12	120780210	-	hs|12q24.31	NM_002442	chr12:120780269-120780210	NM_002442	Hs.158311
A_33_P3342235	2.58769	1.37167	2.58769	up	CDC42EP5	CDC42 effector protein (Rho GTPase binding) 5	FALSE	Homo sapiens CDC42 effector protein (Rho GTPase binding) 5 (CDC42EP5), mRNA [NM_145057]	148170	GO:0005886|GO:0008360|GO:0007254|GO:0007266|GO:0005100|GO:0012505|GO:0005737|GO:0016020|GO:0030838|GO:0032321|GO:0031274|GO:0017049|GO:0005856	54976270	chr19	54976211	-	hs|19q13.42	NM_145057	chr19:54976270-54976211	NM_145057	Hs.415791
A_33_P3418091	2.37373	1.24715	2.37373	up	ISLR2	immunoglobulin superfamily containing leucine-rich repeat 2	FALSE	Homo sapiens immunoglobulin superfamily containing leucine-rich repeat 2 (ISLR2), transcript variant 1, mRNA [NM_001130136]	57611	GO:0009986|GO:0005886|GO:0045773|GO:0016021	74428469	chr15	74428410	+	hs|15q24.1	NM_001130136	chr15:74428410-74428469	NM_001130136	Hs.254775
A_23_P164100	8.08179	3.01468	8.08179	up	C17orf64	chromosome 17 open reading frame 64	FALSE	Homo sapiens chromosome 17 open reading frame 64 (C17orf64), mRNA [NM_181707]	124773		58508609	chr17	58508550	+	hs|17q23.2	NM_181707	chr17:58508550-58508609	NM_181707	Hs.129312
A_24_P393611	2.41082	1.26952	2.41082	up	GNAO1	guanine nucleotide binding protein (G protein), alpha activating activity polypeptide O	FALSE	Homo sapiens guanine nucleotide binding protein (G protein), alpha activating activity polypeptide O (GNAO1), transcript variant 2, mRNA [NM_138736]	2775	GO:0042542|GO:0043005|GO:0005886|GO:0031852|GO:0008016|GO:0003924|GO:0031175|GO:0046872|GO:0006936|GO:0051926|GO:0007626|GO:0004871|GO:0034097|GO:0051430|GO:0042493|GO:0007568|GO:0005834|GO:0043278|GO:0007212|GO:0005525|GO:0031683|GO:0006184|GO:0032794|GO:0043547|GO:0007188|GO:0031821|GO:0030900	56374882	chr16	56374823	+	hs|16q12.2	NM_138736	chr16:56374823-56374882	NM_138736	Hs.644524
A_21_P0012197	8.94788	3.16155	8.94788	up	XLOC_l2_009182		FALSE	BROAD Institute lincRNA (XLOC_l2_009182), lincRNA [TCONS_l2_00017189]			29817578	chr21	29817519	-	hs|21q21.3		chr21:29817578-29817519
A_21_P0005085	2.52028	1.33358	2.52028	up	lnc-SDIM1-1	lnc-SDIM1-1:1	FALSE	LNCipedia lincRNA (lnc-SDIM1-1), lincRNA [lnc-SDIM1-1:1]			166253151	chr6	166253092	-	hs|6q27		chr6:166253151-166253092
A_21_P0000754	2.03261	1.02333	2.03261	up	LOC100507091	uncharacterized LOC100507091	FALSE	Homo sapiens uncharacterized LOC100507091 (LOC100507091), long non-coding RNA [NR_038290]	100507091		123569284	chr12	123569225	+	hs|12q24.31	NR_038290	chr12:123569225-123569284	NR_038290	Hs.683912
A_19_P00315967	2.12007	1.08411	2.12007	up			FALSE	ens			83966385	chr16	83966326	+	hs|16q23.3		chr16:83966326-83966385
A_21_P0011514	2.08186	1.05787	2.08186	up	CDRT15L2	CMT1A duplicated region transcript 15-like 2	FALSE	Homo sapiens CMT1A duplicated region transcript 15-like 2 (CDRT15L2), mRNA [NM_001190790]	256223	GO:0016021	20484193	chr17	20484134	+	hs|17p11.2		chr17:20484134-20484193	NM_001190790	Hs.131916
A_21_P0012044	2.81113	1.49115	2.81113	up	LOC102725407	uncharacterized LOC102725407	FALSE		102725407		223186180	chr2	223186121	+	hs|2q36.1		chr2:223186121-223186180
A_32_P812268	11.7409	3.55347	11.7409	up	CALHM1	calcium homeostasis modulator 1	FALSE	Homo sapiens calcium homeostasis modulator 1 (CALHM1), mRNA [NM_001001412]	255022	GO:0005262|GO:0005244|GO:0050916|GO:0050917|GO:0042802|GO:0050913|GO:0005887|GO:0070588|GO:0005789|GO:0015867|GO:0034765|GO:0051260|GO:0005227|GO:0006812	105213658	chr10	105213599	-	hs|10q24.33	NM_001001412	chr10:105213658-105213599	NM_001001412	Hs.680365
A_33_P3229789	2.76979	1.46978	2.76979	up			FALSE				56662416	chr19	56662357	-	hs|19q13.43		chr19:056662416-056662357
A_19_P00316242	2.60241	1.37985	2.60241	up	LOC101928858	uncharacterized LOC101928858	FALSE	PREDICTED: Homo sapiens uncharacterized LOC101928858 (RP11-434D9.1), transcript variant X3, ncRNA [XR_427726]	101928858		67100675	chr5	67100616	+	hs|5q13.1	XR_427726	chr5:67100616-67100675	XR_427726
A_33_P3249291	2.56011	1.3562	2.56011	up	VWA3A	von Willebrand factor A domain containing 3A	FALSE	Homo sapiens von Willebrand factor A domain containing 3A (VWA3A), mRNA [NM_173615]	146177	GO:0005576	22128187	chr16	22128128	+	hs|16p12.2	NM_173615	chr16:22128128-22128187	NM_173615	Hs.10697
A_19_P00318323	2.04949	1.03526	2.04949	up	CASC15	cancer susceptibility candidate 15 (non-protein coding)	FALSE	Homo sapiens cancer susceptibility candidate 15 (non-protein coding) (CASC15), long non-coding RNA [NR_015410]	401237		22194614	chr6	22194555	+	hs|6p22.3	NR_015410	chr6:22194555-22194614	NR_015410	Hs.712707
A_24_P280497	3.89464	1.96149	3.89464	up	FBRSL1	fibrosin-like 1	FALSE	Homo sapiens fibrosin-like 1 (FBRSL1), mRNA [NM_001142641]	57666		133159813	chr12	133159754	+	hs|12q24.33	NM_001142641	chr12:133159754-133159813	NM_001142641	Hs.411138
A_33_P3317613	3.90631	1.96581	3.90631	up	SYN2	synapsin II	FALSE	Homo sapiens synapsin II (SYN2), transcript variant IIa, mRNA [NM_133625]	6854	GO:0030054|GO:0008152|GO:0045202|GO:0007268|GO:0030672|GO:0003824|GO:0005524|GO:0007269	12232907	chr3	12232848	+	hs|3p25.2	NM_133625	chr3:12232848-12232907	NM_133625	Hs.445503
A_21_P0013492	4.03898	2.01399	4.03898	up	LOC101929488	uncharacterized LOC101929488	FALSE	Homo sapiens uncharacterized LOC101929488 (LOC101929488), long non-coding RNA [NR_125818]	101929488		58259371	chr8	58259312	+	hs|8q12.1	NR_125818	chr8:58259312-58259371	NR_125818	Hs.407557
A_33_P3395081	2.22404	1.15318	2.22404	up	ACSM5	acyl-CoA synthetase medium-chain family member 5	FALSE	Homo sapiens acyl-CoA synthetase medium-chain family member 5 (ACSM5), mRNA [NM_017888]	54988	GO:0005759|GO:0006631|GO:0005525|GO:0005524|GO:0047760|GO:0046872	20452285	chr16	20452226	+	hs|16p12.3		chr16:20452226-20452285	NM_017888	Hs.659606
A_23_P92928	2.42102	1.27562	2.42102	up	C6	complement component 6	FALSE	Homo sapiens complement component 6 (C6), transcript variant 1, mRNA [NM_000065]	729	GO:0005515|GO:0030449|GO:0006956|GO:0005579|GO:0045087|GO:0019835|GO:0006958|GO:0005576|GO:0001970|GO:0001701|GO:0045766|GO:0070062	41142971	chr5	41142912	-	hs|5p13.1	NM_000065	chr5:41142971-41142912	NM_000065	Hs.481992
A_33_P3344648	2.13345	1.09319	2.13345	up	LOC440461	Rho GTPase activating protein 27 pseudogene	FALSE	Homo sapiens Rho GTPase activating protein 27 pseudogene (LOC440461), non-coding RNA [NR_027283]	440461		66196150	chr17	66196091	+	hs|17q24.2	NR_027283	chr17:66196091-66196150	NR_027283	Hs.661522
A_21_P0000705	5.30992	2.40869	5.30992	up	ARHGEF26-AS1	ARHGEF26 antisense RNA 1	FALSE	Homo sapiens ARHGEF26 antisense RNA 1 (ARHGEF26-AS1), long non-coding RNA [NR_037901]	100507524		153742903	chr3	153742844	-	hs|3q25.2	NR_037901	chr3:153742903-153742844	NR_037901	Hs.370221
A_23_P146134	2.10674	1.07501	2.10674	up	DUSP26	dual specificity phosphatase 26 (putative)	FALSE	Homo sapiens dual specificity phosphatase 26 (putative) (DUSP26), mRNA [NM_024025]	78986	GO:0005515|GO:0001102|GO:0005794|GO:0005634|GO:0000122|GO:0035335|GO:0004647|GO:0045785|GO:0005739|GO:0002039|GO:0005737|GO:0006470|GO:0044387|GO:0070373|GO:0004721|GO:0008138|GO:0004725|GO:0070062	33448945	chr8	33448886	-	hs|8p12	NM_024025	chr8:33448945-33448886	NM_024025	Hs.8719
A_33_P3233378	5.7109	2.51372	5.7109	up	LOC101060157	uncharacterized LOC101060157	FALSE	PREDICTED: Homo sapiens mucin-19-like (LOC101060157), mRNA [XM_006709929]	101060157	GO:0005615	65919	chrUn_gl000212	65860	+		XM_006709929	chrUn_gl000212:65860-65919	XM_006709929	Hs.648234
A_19_P00321628	3.38945	1.76105	3.38945	up	LINC00888	long intergenic non-protein coding RNA 888	FALSE	Homo sapiens long intergenic non-protein coding RNA 888 (LINC00888), transcript variant 1, long non-coding RNA [NR_038301]	100505687		183165735	chr3	183165676	+	hs|3q27.1	NR_038301	chr3:183165676-183165735	NR_038301	Hs.551751
A_33_P3248982	2.79737	1.48407	2.79737	up	FAIM2	Fas apoptotic inhibitory molecule 2	FALSE	Homo sapiens Fas apoptotic inhibitory molecule 2 (FAIM2), mRNA [NM_012306]	23017	GO:0043066|GO:0030054|GO:2001234|GO:0006915|GO:0021549|GO:0043523|GO:0043524|GO:0021680|GO:0021702|GO:0002931|GO:0021681|GO:0045211|GO:0045121|GO:0016021	50260739	chr12	50260680	-	hs|12q13.12	NM_012306	chr12:50260739-50260680	NM_012306	Hs.567424
A_19_P00322813	2.01748	1.01255	2.01748	up	CCDC171	coiled-coil domain containing 171	FALSE	coiled-coil domain containing 171 [Source:HGNC Symbol;Acc:HGNC:29828] [ENST00000478913]	203238		16061002	chr9	16060943	+	hs|9p22.3	AL832443	chr9:16060943-16061002		Hs.17267
A_21_P0014719	5.26342	2.396	5.26342	up			FALSE	Homo sapiens cDNA FLJ42482 fis, clone BRACE2032134. [AK124473]			24673169	chr4	24673110	+	hs|4p15.2	AK124473	chr4:24673110-24673169		Hs.640220
A_21_P0009404	2.10216	1.07187	2.10216	up	lnc-ACCN1-1	lnc-ACCN1-1:8	FALSE	LNCipedia lincRNA (lnc-ACCN1-1), lincRNA [lnc-ACCN1-1:8]			32496160	chr17	32496101	-	hs|17q12		chr17:32496160-32496101
A_33_P3272399	2.33776	1.22513	2.33776	up	LOC645427	uncharacterized LOC645427	FALSE	Homo sapiens cDNA FLJ37088 fis, clone BRACE2017124. [AK094407]	645427		21316160	chr17	21316101	+	hs|17p11.2	AK094407	chr17:21316101-21316160		Hs.683873
A_21_P0012399	2.55207	1.35167	2.55207	up	XLOC_l2_009887		FALSE	BROAD Institute lincRNA (XLOC_l2_009887), lincRNA [TCONS_l2_00018863]			130548693	chr3	130548634	+	hs|3q22.1		chr3:130548634-130548693
A_33_P3410206	2.88188	1.52701	2.88188	up	VPS9D1	VPS9 domain containing 1	FALSE	Homo sapiens VPS9 domain containing 1 (VPS9D1), mRNA [NM_004913]	9605	GO:0043547|GO:0005215|GO:0015986|GO:0005096	89777241	chr16	89777182	-	hs|16q24.3	NM_004913	chr16:89777241-89777182	NM_004913	Hs.164410
A_33_P3424882	3.55662	1.83051	3.55662	up			FALSE	chondroitin sulfate proteoglycan 4 pseudogene 4, Y-linked [Source:HGNC Symbol;Acc:HGNC:38535] [ENST00000333235]			27626319	chrY	27626260	+	hs|Yq11.23		chrY:27626260-27626319
A_33_P3231156	4.21443	2.07534	4.21443	up			FALSE	metallothionein 1C, pseudogene [Source:HGNC Symbol;Acc:HGNC:7395] [ENST00000567054]			56682802	chr16	56682743	+	hs|16q12.2		chr16:56682743-56682802
A_19_P00317242	3.80588	1.92823	3.80588	up	LOC388210	uncharacterized LOC388210	FALSE	PREDICTED: Homo sapiens uncharacterized LOC388210 (LOC388210), mRNA [XM_001716361]	388210		11479249	chr16	11479190	-	hs|16p13.13		chr16:11479249-11479190	XM_001716361	Hs.188007
A_23_P338495	2.29058	1.19571	2.29058	up	2019-03-08	membrane-associated ring finger (C3HC4) 8, E3 ubiquitin protein ligase	FALSE	Homo sapiens membrane-associated ring finger (C3HC4) 8, E3 ubiquitin protein ligase (MARCH8), transcript variant 4, mRNA [NM_001282866]	220972	GO:0000209|GO:0004842|GO:0042289|GO:0002495|GO:0016874|GO:0005765|GO:0005764|GO:0031901|GO:0045347|GO:0008270|GO:0016021|GO:0030659|GO:0005768	45953813	chr10	45953754	-	hs|10q11.21	NM_001282866	chr10:45953813-45953754	NM_001282866	Hs.499489
A_19_P00317856	2.20927	1.14357	2.20927	up	LOC101928156	uncharacterized LOC101928156	FALSE	PREDICTED: Homo sapiens uncharacterized LOC101928156 (LOC101928156), ncRNA [XR_241404]	101928156		217385497	chr2	217385438	+	hs|2q35	XR_241404	chr2:217385438-217385497	XR_241404
A_33_P3401084	2.02009	1.01442	2.02009	up			FALSE				37308350	chr17	37308291	+	hs|17q12		chr17:037308291-037308350
A_21_P0007306	2.20686	1.14199	2.20686	up	lnc-GLB1L2-1	lnc-GLB1L2-1:8	FALSE	LNCipedia lincRNA (lnc-GLB1L2-1), lincRNA [lnc-GLB1L2-1:8]			134352840	chr11	134352781	+	hs|11q25		chr11:134352781-134352840
A_24_P203953	4.69615	2.23148	4.69615	up	LOC439951	uncharacterized LOC439951	FALSE	PREDICTED: Homo sapiens uncharacterized LOC439951 (LOC439951), misc_RNA [XR_171055]	439951	GO:0005615	11653678	chr10	11653619	+	hs|10p14	XR_171055	chr10:11653619-11653678	XR_171055	Hs.590986
A_33_P3304369	2.03547	1.02536	2.03547	up			FALSE				149832991	chr1	149832932	-	hs|1q21.2		chr1:149832991-149832932
A_21_P0009578	2.34427	1.22914	2.34427	up	lnc-FBXO15-4	lnc-FBXO15-4:1	FALSE	LNCipedia lincRNA (lnc-FBXO15-4), lincRNA [lnc-FBXO15-4:1]			71266115	chr18	71266056	-	hs|18q22.3		chr18:71266115-71266056
A_33_P3391135	3.67216	1.87663	3.67216	up	GPR133	G protein-coupled receptor 133	FALSE	Homo sapiens G protein-coupled receptor 133 (GPR133), mRNA [NM_198827]	283383	GO:0007186|GO:0005886|GO:0004930|GO:0016021	131623833	chr12	131623774	+	hs|12q24.33	NM_198827	chr12:131623774-131623833	NM_198827	Hs.719239
A_19_P00809455	3.01042	1.58996	3.01042	up	lnc-HES1-3	lnc-HES1-3:2	FALSE	LNCipedia lincRNA (lnc-HES1-3), lincRNA [lnc-HES1-3:2]			193975882	chr3	193975823	+	hs|3q29		chr3:193975823-193975882
A_21_P0002208	2.45972	1.29849	2.45972	up	lnc-PRKCE-1	lnc-PRKCE-1:1	FALSE	LNCipedia lincRNA (lnc-PRKCE-1), lincRNA [lnc-PRKCE-1:1]			45560450	chr2	45560391	+	hs|2p21		chr2:45560391-45560450
A_33_P3277808	2.31404	1.21041	2.31404	up	LOC101928125	major seminal plasma glycoprotein PSP-I-like	FALSE	PREDICTED: Homo sapiens major seminal plasma glycoprotein PSP-I-like (LOC101928125), mRNA [XM_005270310]	101928125		124438549	chr10	124438490	+	hs|10q26.13		chr10:124438490-124438549	XM_005270310
A_21_P0006070	2.88737	1.52976	2.88737	up			FALSE	K-EST0058554 S13KMS5s1 Homo sapiens cDNA clone S13KMS5s1-7-G08 5', mRNA sequence [BQ082119]			22204049	chr9	22203990	-	hs|9p21.3		chr9:22204049-22203990		Hs.522036
A_21_P0003708	2.6604	1.41164	2.6604	up	lnc-FRG1-2	lnc-FRG1-2:1	FALSE	LNCipedia lincRNA (lnc-FRG1-2), lincRNA [lnc-FRG1-2:1]			190599889	chr4	190599169	+	hs|4q35.2		chr4:190599169-190599889
A_24_P412734	2.50421	1.32436	2.50421	up	PRSS36	protease, serine, 36	FALSE	Homo sapiens protease, serine, 36 (PRSS36), transcript variant 1, mRNA [NM_173502]	146547	GO:0005737|GO:0004252|GO:0006508|GO:0005578	31151730	chr16	31151671	-	hs|16p11.2	NM_173502	chr16:31151730-31151671	NM_173502	Hs.256632
A_33_P3302373	2.77809	1.47409	2.77809	up	SZT2	seizure threshold 2 homolog (mouse)	FALSE	Homo sapiens seizure threshold 2 homolog (mouse) (SZT2), mRNA [NM_015284]	23334	GO:0003674|GO:0021540|GO:0043473|GO:0009791|GO:0007417|GO:0070062|GO:0005777	43918304	chr1	43918245	+	hs|1p34.2	NM_015284	chr1:43918245-43918304	NM_015284	Hs.643560
A_21_P0004584	2.65295	1.4076	2.65295	up			FALSE	long intergenic non-protein coding RNA 1484 [Source:HGNC Symbol;Acc:HGNC:51136] [ENST00000521128]			173146208	chr5	173146149	-	hs|5q35.2		chr5:173146208-173146149		Hs.638681
A_33_P3533001	2.21546	1.14761	2.21546	up	UBE2E4P	ubiquitin-conjugating enzyme E2E 4 pseudogene	FALSE	AL568675 Homo sapiens PLACENTA Homo sapiens cDNA clone CS0DE004YG14 3-PRIME, mRNA sequence [AL568675]	286480		181922483	chr2	181922424	-	hs|2q31.3	AL568675	chr2:181922483-181922424		Hs.567831
A_19_P00807384	2.16837	1.11661	2.16837	up	LOC101927151	uncharacterized LOC101927151	FALSE	Homo sapiens uncharacterized LOC101927151 (LOC101927151), transcript variant 1, long non-coding RNA [NR_110687]	101927151		28288933	chr19	28288874	+	hs|19q11	NR_110687	chr19:28288874-28288933	NR_110687
A_21_P0014149	2.54948	1.35021	2.54948	up	LOC101928794	uncharacterized LOC101928794	FALSE	Homo sapiens uncharacterized LOC101928794 (LOC101928794), long non-coding RNA [NR_111908]	101928794		66297521	chr5	66297462	-	hs|5q12.3	NR_111908	chr5:66297521-66297462	NR_111908
A_19_P00321279	5.12852	2.35854	5.12852	up	LOC101929450	uncharacterized LOC101929450	FALSE	Homo sapiens uncharacterized LOC101929450 (LOC101929450), transcript variant 2, long non-coding RNA [NR_125815]	101929450		29655999	chr8	29655940	+	hs|8p12	NR_125815	chr8:29655940-29655999	NR_125815	Hs.512440
A_33_P3290394	2.28845	1.19437	2.28845	up	IL2RG	interleukin 2 receptor, gamma	FALSE	Homo sapiens interleukin 2 receptor, gamma (IL2RG), mRNA [NM_000206]	3561	GO:0005515|GO:0004911|GO:0004913|GO:0005886|GO:0004917|GO:0019982|GO:0019976|GO:0007165|GO:0006955|GO:0016020|GO:0005887|GO:0038111|GO:0016032|GO:0038110|GO:0035771|GO:0009897	70327330	chrX	70327271	-	hs|Xq13.1	NM_000206	chrX:70327330-70327271	NM_000206	Hs.84
A_21_P0005222	4.9652	2.31185	4.9652	up			FALSE	CR744744 Soares_testis_NHT Homo sapiens cDNA clone IMAGp971O0875 ; IMAGE:1735901 5', mRNA sequence [CR744744]			36095041	chr7	36075562	+	hs|7p14.2		chr7:36075562-36095041		Hs.583465
A_19_P00318909	2.14254	1.09932	2.14254	up	XLOC_l2_010751		FALSE	BROAD Institute lincRNA (XLOC_l2_010751), lincRNA [TCONS_l2_00020645]			90606636	chr4	90606577	+	hs|4q22.1		chr4:90606577-90606636		Hs.696466
A_32_P70818	2.03589	1.02566	2.03589	up	PAX9	paired box 9	FALSE	Homo sapiens paired box 9 (PAX9), mRNA [NM_006194]	5083	GO:0005515|GO:0000977|GO:0071363|GO:0060325|GO:0007492|GO:0045944|GO:0042481|GO:0042476|GO:0005634|GO:0001228|GO:0045892|GO:0006351	37146680	chr14	37146621	+	hs|14q13.3	NM_006194	chr14:37146621-37146680	NM_006194	Hs.132576
A_33_P3291459	34.9909	5.12891	34.9909	up	LOC100507547	uncharacterized LOC100507547	FALSE	Homo sapiens uncharacterized LOC100507547 (LOC100507547), transcript variant 1, long non-coding RNA [NR_037169]	100507547		32120638	chr6	32120579	-	hs|6p21.32	NR_037169	chr6:32120638-32120579	NR_037169	Hs.549204
A_21_P0006089	5.16	2.36737	5.16	up			FALSE				93727608	chr9	93727549	-	hs|9q22.2		chr9:93727608-93727549
A_21_P0008530	3.02069	1.59488	3.02069	up	lnc-NOVA1-1	lnc-NOVA1-1:1	FALSE	LNCipedia lincRNA (lnc-NOVA1-1), lincRNA [lnc-NOVA1-1:1]			26860598	chr14	26860539	-	hs|14q12		chr14:26860598-26860539
A_21_P0003879	3.4322	1.77913	3.4322	up	MGC39584	uncharacterized LOC441058	FALSE	Homo sapiens uncharacterized LOC441058 (MGC39584), long non-coding RNA [NR_038377]	441058		75669	chr4_gl000193_random	75610	-		NR_038377	chr4_gl000193_random:75669-75610	NR_038377	Hs.130535
A_21_P0011856	2.27389	1.18516	2.27389	up	XLOC_l2_007571		FALSE	BROAD Institute lincRNA (XLOC_l2_007571), lincRNA [TCONS_l2_00014004]			136758090	chr2	136758031	+	hs|2q21.3		chr2:136758031-136758090
A_33_P3373970	7.187	2.84539	7.187	up			FALSE
A_19_P00321631	3.96834	1.98853	3.96834	up	LOC100422737	uncharacterized LOC100422737	FALSE		100422737		107220145	chr6	107220086	-	hs|6q21		chr6:107220145-107220086		Hs.729217
A_23_P217297	4.20691	2.07276	4.20691	up	ZNF711	zinc finger protein 711	FALSE	Homo sapiens zinc finger protein 711 (ZNF711), mRNA [NM_021998]	7552	GO:0043565|GO:0005515|GO:0005634|GO:0045893|GO:0046872|GO:0006351|GO:0070062	84527301	chrX	84527242	+	hs|Xq21.1	NM_021998	chrX:84527242-84527301	NM_021998	Hs.326801
A_33_P3277344	2.08002	1.0566	2.08002	up			FALSE	T cell receptor alpha variable 39 [Source:HGNC Symbol;Acc:HGNC:12139] [ENST00000390466]			22772365	chr14	22772306	+	hs|14q11.2	X58740	chr14:22772306-22772365		Hs.495255
A_33_P3401841	2.15886	1.11027	2.15886	up	CTDP1	CTD (carboxy-terminal domain, RNA polymerase II, polypeptide A) phosphatase, subunit 1	FALSE	CTD (carboxy-terminal domain, RNA polymerase II, polypeptide A) phosphatase, subunit 1 [Source:HGNC Symbol;Acc:HGNC:2498] [ENST00000613122]	9150	GO:0010458|GO:0010467|GO:0005813|GO:0006368|GO:0006366|GO:0003899|GO:0005819|GO:0030496|GO:0051233|GO:0015629|GO:0050434|GO:0000922|GO:0005737|GO:0006470|GO:0016032|GO:0005654|GO:0051301|GO:0008420	77515241	chr18	77515182	+	hs|18q23	AK123920	chr18:77515182-77515241		Hs.640231
A_21_P0013428	2.16259	1.11276	2.16259	up	lnc-ZNF680-9	lnc-ZNF680-9:1	FALSE	AF254249S5 phosphorylase kinase gamma {Homo sapiens} (exp=-1; wgp=0; cg=0), partial (35%) [THC2728991]			62702002	chr7	62694104	-	hs|7q11.21		chr7:62702002-62694104
A_21_P0009976	4.24599	2.0861	4.24599	up	lnc-TSHZ2-3	lnc-TSHZ2-3:7	FALSE	LNCipedia lincRNA (lnc-TSHZ2-3), lincRNA [lnc-TSHZ2-3:7]			51314914	chr20	51314855	+	hs|20q13.2		chr20:51314855-51314914
A_21_P0006672	2.04474	1.03191	2.04474	up	lnc-ZNF37A-3	lnc-ZNF37A-3:2	FALSE	Q96CB5_HUMAN (Q96CB5) C8orf44 protein, partial (23%) [THC2579940]			38724662	chr10	38724603	+	hs|10p11.1		chr10:38724603-38724662
A_24_P49260	2.19889	1.13678	2.19889	up	SPTLC3	serine palmitoyltransferase, long chain base subunit 3	FALSE	Homo sapiens serine palmitoyltransferase, long chain base subunit 3 (SPTLC3), mRNA [NM_018327]	55304	GO:0006665|GO:0046520|GO:0004758|GO:0030148|GO:0030170|GO:0005789|GO:0044281|GO:0016021|GO:0017059	13147113	chr20	13147054	+	hs|20p12.1	NM_018327	chr20:13147054-13147113	NM_018327	Hs.425023
A_33_P3322730	2.833	1.50233	2.833	up			FALSE
A_21_P0010339	3.6048	1.84992	3.6048	up			FALSE	DB069106 TESTI4 Homo sapiens cDNA clone TESTI4011248 5', mRNA sequence [DB069106]			17097923	chr22	17097864	+	hs|22q11.1		chr22:17097864-17097923		Hs.691526
A_33_P3257513	2.02641	1.01893	2.02641	up	FAT3	FAT atypical cadherin 3	FALSE	Homo sapiens FAT atypical cadherin 3 (FAT3), mRNA [NM_001008781]	120114	GO:0005886|GO:0005509|GO:0007275|GO:0016021|GO:0007156	92629131	chr11	92629072	+	hs|11q14.3	NM_001008781	chr11:92629072-92629131	NM_001008781	Hs.98523
A_33_P3386297	2.65185	1.407	2.65185	up			FALSE	Homo sapiens MSTP159 (MST159) mRNA, complete cds. [AF190162]			135240297	chrX	135240238	+	hs|Xq26.3	AF190162	chrX:135240238-135240297		Hs.689084
A_33_P3317317	2.26933	1.18226	2.26933	up	KRTAP5-4	keratin associated protein 5-4	FALSE	Homo sapiens keratin associated protein 5-4 (KRTAP5-4), mRNA [NM_001012709]	387267	GO:0045095	1642696	chr11	1642637	-	hs|11p15.5	NM_001012709	chr11:1642696-1642637	NM_001012709	Hs.539087
A_24_P15640	8.65339	3.11327	8.65339	up			FALSE	Homo sapiens chromosome 19 open reading frame 31, mRNA (cDNA clone MGC:168625 IMAGE:9021002), complete cds. [BC137009]			4909287	chr19	4909228	-	hs|19p13.3	BC137009	chr19:4909287-4909228		Hs.108106
A_33_P3377786	2.41814	1.2739	2.41814	up			FALSE	Homo sapiens ELK2, member of ETS oncogene family, pseudogene 1, mRNA (cDNA clone IMAGE:5272595). [BC031259]			106138665	chr14	106138606	-	hs|14q32.33	BC031259	chr14:106138665-106138606
A_21_P0009702	2.35146	1.23356	2.35146	up	LOC102725381	uncharacterized LOC102725381	FALSE	PREDICTED: Homo sapiens uncharacterized LOC102725381 (LOC102725381), ncRNA [XR_424967]	102725381		29706418	chr19	29706359	+	hs|19q12	XR_424967	chr19:29706359-29706418	XR_424967
A_23_P149858	2.31935	1.21372	2.31935	up	ELOVL3	ELOVL fatty acid elongase 3	FALSE	Homo sapiens ELOVL fatty acid elongase 3 (ELOVL3), mRNA [NM_152310]	83401	GO:0005515|GO:0005783|GO:0019367|GO:0044281|GO:0035338|GO:0005789|GO:0019432|GO:0007623|GO:0034625|GO:0016021|GO:0034626|GO:0042761|GO:0016740|GO:0044255	103988929	chr10	103988870	+	hs|10q24.32	NM_152310	chr10:103988870-103988929	NM_152310	Hs.302130
A_23_P252541	2.02086	1.01497	2.02086	up	RAB7B	RAB7B, member RAS oncogene family	FALSE	Homo sapiens RAB7B, member RAS oncogene family (RAB7B), transcript variant 1, mRNA [NM_177403]	338382	GO:0005802|GO:0032755|GO:0034144|GO:0005794|GO:0005770|GO:0007264|GO:0005525|GO:0015031|GO:0005764|GO:0045335|GO:0045654|GO:0051092|GO:0034499|GO:0030670|GO:0034164						NM_177403		NM_177403	Hs.534612
A_33_P3415113	2.24514	1.1668	2.24514	up	CLCN6	chloride channel, voltage-sensitive 6	FALSE	Homo sapiens chloride channel, voltage-sensitive 6 (CLCN6), transcript variant 1, mRNA [NM_001286]	1185	GO:0006821|GO:0005247|GO:0005765|GO:0005524|GO:0055085|GO:0006884|GO:0009612|GO:0007165|GO:0044070|GO:0015297|GO:0034220|GO:0016021|GO:0010008	11888275	chr1	11888216	+	hs|1p36.22	NM_001286	chr1:11888216-11888275	NM_001286	Hs.193043
A_33_P3275435	2.16712	1.11578	2.16712	up	KMT2E-AS1	KMT2E antisense RNA 1 (head to head)	FALSE	Homo sapiens KMT2E antisense RNA 1 (head to head) (KMT2E-AS1), long non-coding RNA [NR_024586]	100216545		104651052	chr7	104650993	-	hs|7q22.3	NR_024586	chr7:104651052-104650993	NR_024586	Hs.631150
A_19_P00322859	4.90469	2.29416	4.90469	up	lnc-GLB1L2-1	lnc-GLB1L2-1:11	FALSE	LNCipedia lincRNA (lnc-GLB1L2-1), lincRNA [lnc-GLB1L2-1:11]			134372969	chr11	134372910	+	hs|11q25		chr11:134372910-134372969
A_33_P3423445	2.74993	1.45939	2.74993	up	ZNF730	zinc finger protein 730	FALSE	PREDICTED: Homo sapiens zinc finger protein 730 (ZNF730), transcript variant X1, mRNA [XM_006722596]	100129543	GO:0006355|GO:0005634|GO:0003677|GO:0046872|GO:0006351	23332717	chr19	23332658	+	hs|19p12	XM_006722596	chr19:23332658-23332717	XM_006722596	Hs.427120
A_21_P0005556	3.72334	1.8966	3.72334	up	lnc-EPDR1-1	lnc-EPDR1-1:1	FALSE	LNCipedia lincRNA (lnc-EPDR1-1), lincRNA [lnc-EPDR1-1:1]			38055881	chr7	38053126	+	hs|7p14.1		chr7:38053126-38055881
A_23_P104509	2.22716	1.15521	2.22716	up	FAM53B	family with sequence similarity 53, member B	FALSE	Homo sapiens family with sequence similarity 53, member B (FAM53B), mRNA [NM_014661]	9679	GO:0008150|GO:0003674|GO:0005575	126370389	chr10	126370330	-	hs|10q26.13	NM_014661	chr10:126370389-126370330	NM_014661	Hs.129195
A_21_P0005209	3.29817	1.72167	3.29817	up			FALSE				6124300	chr7	6124241	+	hs|7p22.1		chr7:6124241-6124300		Hs.629578
A_32_P74579	2.75767	1.46345	2.75767	up	GAS2L2	growth arrest-specific 2 like 2	FALSE	Homo sapiens growth arrest-specific 2 like 2 (GAS2L2), mRNA [NM_139285]	246176	GO:0008017|GO:0005737|GO:0001725|GO:0051015|GO:0001578|GO:0005874|GO:0007026|GO:0007050|GO:0005856|GO:0008093	34071864	chr17	34071805	-	hs|17q12	NM_139285	chr17:34071864-34071805	NM_139285	Hs.591194
A_33_P3388618	2.04705	1.03355	2.04705	up	TNK1	tyrosine kinase, non-receptor, 1	FALSE	Homo sapiens tyrosine kinase, non-receptor, 1 (TNK1), transcript variant 1, mRNA [NM_001251902]	8711	GO:0005515|GO:0030308|GO:0051427|GO:0005524|GO:0030154|GO:0031234|GO:0005829|GO:0046580|GO:0005737|GO:0046777|GO:0016020|GO:0016477|GO:0045087|GO:0042127|GO:0006468|GO:0004713|GO:0004871|GO:0038083|GO:0004715|GO:0007169	7293056	chr17	7292997	+	hs|17p13.1	NM_001251902	chr17:7292997-7293056	NM_001251902	Hs.203420
A_33_P3334703	2.28443	1.19183	2.28443	up			FALSE				48260352	chr19	48260293	-	hs|19q13.33		chr19:048260352-048260293
A_33_P3345816	2.20729	1.14227	2.20729	up	GPER1	G protein-coupled estrogen receptor 1	FALSE	Homo sapiens G protein-coupled estrogen receptor 1 (GPER1), transcript variant 3, mRNA [NM_001039966]	2852	GO:0005802|GO:0005515|GO:0030054|GO:0045599|GO:0019228|GO:0005622|GO:0032024|GO:0005496|GO:0048786|GO:0045745|GO:0005794|GO:0030335|GO:0031966|GO:0045742|GO:0004930|GO:0014069|GO:0014068|GO:0044327|GO:0043280|GO:0042734|GO:0007049|GO:0007186|GO:0005887|GO:0045087|GO:0005789|GO:0030263|GO:0030264|GO:0032962|GO:0001956|GO:0030424|GO:0048471|GO:0008284|GO:0008285|GO:0005886|GO:0005783|GO:0030819|GO:…	1133337	chr7	1133278	+	hs|7p22.3	NM_001039966	chr7:1133278-1133337	NM_001039966	Hs.20961
A_33_P3377239	2.1231	1.08617	2.1231	up	LOC100270804	uncharacterized LOC100270804	FALSE	Homo sapiens uncharacterized LOC100270804 (LOC100270804), long non-coding RNA [NR_026885]	100270804		18776577	chr20	18776518	+	hs|20p11.23		chr20:18776518-18776577	NR_026885	Hs.598768
A_24_P336551	3.22095	1.68749	3.22095	up	BGLAP	bone gamma-carboxyglutamate (gla) protein	FALSE	Homo sapiens bone gamma-carboxyglutamate (gla) protein (BGLAP), mRNA [NM_199173]	632	GO:0043627|GO:0045471|GO:0045124|GO:0033280|GO:0030282|GO:0005615|GO:0010043|GO:0071305|GO:0030425|GO:0033594|GO:0005737|GO:0046848|GO:0042476|GO:0043204|GO:0008147|GO:0007155|GO:0005791|GO:0014823|GO:0030500|GO:0005794|GO:0042493|GO:0007569|GO:0005509|GO:0031988|GO:0051384|GO:0045670|GO:0033574|GO:0001649|GO:0009612|GO:0060348|GO:0001501|GO:0071363|GO:0002076|GO:0009629|GO:0005198|GO:0032571	156213114	chr1	156213055	+	hs|1q22	NM_199173	chr1:156213055-156213114	NM_199173	Hs.654541
A_33_P3375950	2.03394	1.02427	2.03394	up			FALSE	ribosomal protein L37a pseudogene 8 [Source:HGNC Symbol;Acc:HGNC:35645] [ENST00000494116]			111760066	chr11	111760007	-	hs|11q23.1		chr11:111760066-111760007
A_21_P0006187	3.59169	1.84466	3.59169	up	LOC158435	uncharacterized LOC158435	FALSE	Homo sapiens uncharacterized LOC158435 (LOC158435), long non-coding RNA [NR_033838]	158435		98863462	chr9	98863403	+	hs|9q22.32	NR_033838	chr9:98863403-98863462	NR_033838	Hs.652615
A_23_P81262	2.13745	1.09589	2.13745	up	PCDHB4	protocadherin beta 4	FALSE	Homo sapiens protocadherin beta 4 (PCDHB4), mRNA [NM_018938]	56131	GO:0016339|GO:0005737|GO:0005886|GO:0005887|GO:0005509|GO:0007268|GO:0045111|GO:0016021|GO:0007155|GO:0007416|GO:0007156|GO:0007399	140504469	chr5	140504410	+	hs|5q31.3	NM_018938	chr5:140504410-140504469	NM_018938	Hs.591250
A_23_P136777	2.64029	1.4007	2.64029	up	APOD	apolipoprotein D	FALSE	Homo sapiens apolipoprotein D (APOD), mRNA [NM_001647]	347	GO:0006629|GO:0005515|GO:0048471|GO:0005783|GO:2000098|GO:0042246|GO:0071638|GO:0005615|GO:0048678|GO:0030425|GO:0051895|GO:0015485|GO:0014012|GO:0043025|GO:0006006|GO:0010642|GO:0070062|GO:2000405|GO:0060588|GO:0042493|GO:0007568|GO:0005576|GO:0048662|GO:0001525|GO:0022626|GO:0007420|GO:1900016|GO:0006869|GO:0042308|GO:0000302|GO:0005319	195300767	chr3	195298224	-	hs|3q29	NM_001647	chr3:195300767-195298224	NM_001647	Hs.522555
A_23_P353614	2.62679	1.3933	2.62679	up	C8orf46	chromosome 8 open reading frame 46	FALSE	Homo sapiens chromosome 8 open reading frame 46 (C8orf46), mRNA [NM_152765]	254778		67430418	chr8	67430359	+	hs|8q13.1	NM_152765	chr8:67430359-67430418	NM_152765	Hs.268869
A_33_P3407601	6.16654	2.62446	6.16654	up			FALSE	Q39AC8_BURS3 (Q39AC8) Cytochrome B561, partial (9%) [THC2753069]			20841137	chr17	20841078	-	hs|17p11.2		chr17:020841137-020841078
A_33_P3270317	2.03923	1.02803	2.03923	up	SLC18A3	solute carrier family 18 (vesicular acetylcholine transporter), member 3	FALSE	Homo sapiens solute carrier family 18 (vesicular acetylcholine transporter), member 3 (SLC18A3), mRNA [NM_003055]	6572	GO:0060201|GO:0015870|GO:0016020|GO:0005886|GO:0005887|GO:0072488|GO:0005277|GO:0007268|GO:0007269	50820715	chr10	50820656	+	hs|10q11.23	NM_003055	chr10:50820656-50820715	NM_003055	Hs.654374
A_33_P3405038	2.46245	1.30009	2.46245	up	LOC100130264	uncharacterized LOC100130264	FALSE	Homo sapiens uncharacterized LOC100130264 (LOC100130264), long non-coding RNA [NR_024564]	100130264		19223005	chr20	19222946	-	hs|20p11.23	NR_024564	chr20:19223005-19222946	NR_024564	Hs.683814
A_33_P3214550	4.55083	2.18613	4.55083	up	CXCR2	chemokine (C-X-C motif) receptor 2	FALSE	Homo sapiens chemokine (C-X-C motif) receptor 2 (CXCR2), transcript variant 1, mRNA [NM_001557]	3579	GO:0005515|GO:0002438|GO:0008284|GO:0005886|GO:0007200|GO:0019959|GO:0007204|GO:0042629|GO:0005622|GO:0031623|GO:0072173|GO:0006954|GO:0006935|GO:0033030|GO:0038112|GO:0010666|GO:0004871|GO:0070098|GO:0009986|GO:0030593|GO:0002407|GO:0004918|GO:0045766|GO:0007165|GO:0006968|GO:0016020|GO:0005887|GO:0016494|GO:0090023|GO:0030901|GO:0042119|GO:0043117|GO:0007166	219001934	chr2	219001875	+	hs|2q35	NM_001557	chr2:219001875-219001934	NM_001557	Hs.846
A_33_P3347147	2.35372	1.23494	2.35372	up	SUPT3H	suppressor of Ty 3 homolog (S. cerevisiae)	FALSE	Homo sapiens suppressor of Ty 3 homolog (S. cerevisiae) (SUPT3H), transcript variant 2, mRNA [NM_181356]	8464	GO:0016578|GO:0006355|GO:0005669|GO:0046982|GO:0006357|GO:0006366|GO:0030914|GO:0003713|GO:0006325|GO:0005634|GO:0003677|GO:0033276|GO:0043966|GO:0000124|GO:0005654|GO:0045893|GO:0004402	45290676	chr6	45290617	-	hs|6p21.1	NM_181356	chr6:45290676-45290617	NM_181356	Hs.368325
A_21_P0010093	2.30427	1.20431	2.30427	up	lnc-NCOA3-9	lnc-NCOA3-9:4	FALSE	LNCipedia lincRNA (lnc-NCOA3-9), lincRNA [lnc-NCOA3-9:4]			46700374	chr20	46700315	+	hs|20q13.13		chr20:46700315-46700374
A_21_P0007696	11.3553	3.50529	11.3553	up	lnc-ERGIC2-1	lnc-ERGIC2-1:1	FALSE	LNCipedia lincRNA (lnc-ERGIC2-1), lincRNA [lnc-ERGIC2-1:1]			29565543	chr12	29565484	-	hs|12p11.22		chr12:29565543-29565484
A_21_P0014894	2.47934	1.30996	2.47934	up			FALSE
A_33_P3353622	2.55094	1.35103	2.55094	up	RBAK	RB-associated KRAB zinc finger	FALSE	Homo sapiens RB-associated KRAB zinc finger (RBAK), transcript variant 1, mRNA [NM_021163]	57786	GO:0006355|GO:0008270|GO:0005634|GO:0003676|GO:0045892|GO:0006351	5104860	chr7	5104801	+	hs|7p22.1	NM_021163	chr7:5104801-5104860	NM_021163	Hs.396178
A_21_P0009367	2.96607	1.56855	2.96607	up	lnc-TMEM105-2	lnc-TMEM105-2:9	FALSE	601670942F1 NIH_MGC_20 Homo sapiens cDNA clone IMAGE:3953626 5', mRNA sequence [BF026893]			79354297	chr17	79354238	-	hs|17q25.3		chr17:79354297-79354238		Hs.651390
A_23_P50052	2.01056	1.0076	2.01056	up	C18orf12	chromosome 18 open reading frame 12	FALSE	PREDICTED: Homo sapiens chromosome 18 open reading frame 12 (C18orf12), misc_RNA [XR_109479]	84322		45779006	chr18	45778947	+	hs|18q21.1	XR_109479	chr18:45778947-45779006	XR_109479	Hs.334493
A_33_P3374365	2.23065	1.15746	2.23065	up			FALSE				102788564	chrX	102788505	-	hs|Xq22.2		chrX:102788564-102788505
A_33_P3417502	2.4146	1.27178	2.4146	up	WNT3A	wingless-type MMTV integration site family, member 3A	FALSE	Homo sapiens wingless-type MMTV integration site family, member 3A (WNT3A), mRNA [NM_033131]	89780	GO:0005515|GO:0071300|GO:0045599|GO:0048843|GO:0030879|GO:0005110|GO:0005615|GO:0001947|GO:0005109|GO:0007411|GO:0030198|GO:0061184|GO:0048018|GO:0048337|GO:0042472|GO:0010387|GO:0009986|GO:0005796|GO:0019904|GO:0003713|GO:0021874|GO:0001701|GO:0001649|GO:0070507|GO:0043280|GO:0048697|GO:0003136|GO:0010977|GO:0005788|GO:0045893|GO:0048343|GO:0021846|GO:0008284|GO:0005886|GO:0030890|GO:0061098|GO:…	228248005	chr1	228247946	+	hs|1q42.13	NM_033131	chr1:228247946-228248005	NM_033131	Hs.336930
A_33_P3246418	3.20854	1.68192	3.20854	up	MDFI	MyoD family inhibitor	FALSE	Homo sapiens MyoD family inhibitor (MDFI), transcript variant 1, mRNA [NM_001300804]	4188	GO:0005515|GO:0060707|GO:0030178|GO:0005634|GO:0042994|GO:0048704|GO:0000122|GO:0007257|GO:0009790|GO:0009950|GO:0043392|GO:0005737|GO:0008134	41621970	chr6	41621911	+	hs|6p21.1	NM_001300804	chr6:41621911-41621970	NM_001300804	Hs.520119
A_21_P0000191	2.06386	1.04534	2.06386	up	PSG6	pregnancy specific beta-1-glycoprotein 6	FALSE	Homo sapiens pregnancy specific beta-1-glycoprotein 6 (PSG6), transcript variant 1, mRNA [NM_002782]	5675	GO:0003674|GO:0007565|GO:0005576	43411254	chr19	43411195	-	hs|19q13.31	NM_002782	chr19:43411254-43411195	NM_002782	Hs.646353
A_21_P0014662	2.20496	1.14075	2.20496	up	LOC100507395	uncharacterized LOC100507395	FALSE	PREDICTED: Homo sapiens uncharacterized LOC100507395 (LOC100507395), ncRNA [XR_424061]	100507395		4692	chrUn_gl000220	4633	-		XR_424061	chrUn_gl000220:4692-4633	XR_424061
A_21_P0000058	2.3312	1.22107	2.3312	up	PROM2	prominin 2	FALSE	Homo sapiens prominin 2 (PROM2), transcript variant 1, mRNA [NM_001165978]	150696	GO:0060170|GO:0009986|GO:0031528|GO:0031410|GO:0042995|GO:0044393|GO:0043088|GO:2001287|GO:0005902|GO:0005929|GO:0016323|GO:0016324|GO:0031346|GO:0005887|GO:0015485|GO:0048550|GO:2000369|GO:0071914|GO:0001934|GO:0045121|GO:0070062	95957055	chr2	95956996	+	hs|2q11.1	NM_001165978	chr2:95956996-95957055	NM_001165978	Hs.469313
A_24_P228149	3.72767	1.89827	3.72767	up	KRT13	keratin 13, type I	FALSE	Homo sapiens keratin 13, type I (KRT13), transcript variant 2, mRNA [NM_002274]	3860	GO:0009314|GO:0071300|GO:0005198|GO:0007010|GO:0005634|GO:0045111|GO:0045095|GO:0043587|GO:0070062	39661309	chr17	39659920	-	hs|17q21.2	NM_002274	chr17:39661309-39659920	NM_002274	Hs.654550
A_21_P0009350	2.26247	1.1779	2.26247	up	lnc-ABCA8-2	lnc-ABCA8-2:1	FALSE	LNCipedia lincRNA (lnc-ABCA8-2), lincRNA [lnc-ABCA8-2:1]			66794736	chr17	66794239	-	hs|17q24.2		chr17:66794736-66794239
A_23_P149084	5.48029	2.45425	5.48029	up	GRIK3	glutamate receptor, ionotropic, kainate 3	FALSE	Homo sapiens glutamate receptor, ionotropic, kainate 3 (GRIK3), mRNA [NM_000831]	2899	GO:0030424|GO:0030054|GO:0005886|GO:0001640|GO:0005234|GO:0007268|GO:0007196|GO:0032839|GO:0030425|GO:0034220|GO:0043195|GO:0045211|GO:0004970|GO:0042391|GO:0015277|GO:0043204|GO:0051967|GO:0007216|GO:0035249|GO:0007215|GO:0042734|GO:0035235|GO:0032983|GO:0005887|GO:0008066	37270832	chr1	37270773	-	hs|1p34.3	NM_000831	chr1:37270832-37270773	NM_000831	Hs.128848
A_21_P0000152	2.51148	1.32854	2.51148	up	CD44	CD44 molecule (Indian blood group)	FALSE	Homo sapiens CD44 molecule (Indian blood group) (CD44), transcript variant 8, mRNA [NM_001202557]	960	GO:0005515|GO:0001658|GO:0005886|GO:0051216|GO:0005518|GO:0019221|GO:0050731|GO:0044281|GO:0050900|GO:0016323|GO:0033138|GO:0005737|GO:0016337|GO:0005540|GO:0022617|GO:0030198|GO:0034116|GO:0070374|GO:0043154|GO:0016055|GO:1900625|GO:0030203|GO:0070062|GO:0060333|GO:0043066|GO:0005794|GO:0004896|GO:0009986|GO:0005975|GO:0002246|GO:0044344|GO:0035692|GO:0060442|GO:0010628|GO:0007160|GO:0005887|GO:…	35244850	chr11	35244791	+	hs|11p13	NM_001202557	chr11:35244791-35244850	NM_001202557	Hs.502328
A_21_P0003711	2.83696	1.50435	2.83696	up			FALSE	negative elongation factor complex member A [Source:HGNC Symbol;Acc:HGNC:12768] [ENST00000382882]			2011734	chr4	2011675	-	hs|4p16.3		chr4:2011734-2011675		Hs.21771
A_33_P3449097	2.11235	1.07885	2.11235	up	TSPAN10	tetraspanin 10	FALSE	Homo sapiens tetraspanin 10 (TSPAN10), transcript variant 1, mRNA [NM_001290212]	83882	GO:0072594|GO:0016021|GO:0019899	79615778	chr17	79615719	+	hs|17q25.3	NM_001290212	chr17:79615719-79615778	NM_001290212	Hs.740811
A_21_P0000960	3.60286	1.84914	3.60286	up	lnc-GPR3-2	lnc-GPR3-2:1	FALSE	LNCipedia lincRNA (lnc-GPR3-2), lincRNA [lnc-GPR3-2:1]			27852392	chr1	27852333	+	hs|1p36.11		chr1:27852333-27852392
A_21_P0001428	2.09884	1.06959	2.09884	up	lnc-AC092811.1-1	lnc-AC092811.1-1:1	FALSE	LNCipedia lincRNA (lnc-AC092811.1-1), lincRNA [lnc-AC092811.1-1:1]			225660057	chr1	225659998	+	hs|1q42.12		chr1:225659998-225660057
A_21_P0013285	2.21625	1.14812	2.21625	up	LOC101927668	uncharacterized LOC101927668	FALSE	Homo sapiens uncharacterized LOC101927668 (LOC101927668), long non-coding RNA [NR_110114]	101927668		20000551	chr7	19958831	-	hs|7p21.1		chr7:20000551-19958831	NR_110114
A_23_P416813	2.76997	1.46987	2.76997	up	ZFP82	ZFP82 zinc finger protein	FALSE	Homo sapiens ZFP82 zinc finger protein (ZFP82), mRNA [NM_133466]	284406	GO:0006355|GO:0003700|GO:0005634|GO:0003677|GO:0046872|GO:0006351	36883571	chr19	36883512	-	hs|19q13.12	NM_133466	chr19:36883571-36883512	NM_133466	Hs.558734
A_23_P165788	2.12856	1.08988	2.12856	up	PHOSPHO2	phosphatase, orphan 2	FALSE	Homo sapiens phosphatase, orphan 2 (PHOSPHO2), transcript variant 2, mRNA [NM_001008489]	493911	GO:0016791|GO:0016311|GO:0046872|GO:0033883	170558115	chr2	170558056	+	hs|2q31.1	NM_001008489	chr2:170558056-170558115	NM_001008489	Hs.745233
A_24_P53976	2.02486	1.01782	2.02486	up	GLUL	glutamate-ammonia ligase	FALSE	Homo sapiens glutamate-ammonia ligase (GLUL), transcript variant 1, mRNA [NM_002065]	2752	GO:0008283|GO:0007268|GO:0005634|GO:0044281|GO:0005829|GO:0042802|GO:0005739|GO:0034641|GO:0005737|GO:0004351|GO:0004356|GO:0043204|GO:0051260|GO:0032024|GO:0043679|GO:0070062|GO:0009267|GO:0050679|GO:0005791|GO:0000287|GO:0030145|GO:0006538|GO:0051968|GO:0008652|GO:0005524|GO:0009749|GO:0043234|GO:0045503|GO:0001504|GO:0016595|GO:0006542	182352796	chr1	182352737	-	hs|1q25.3	NM_002065	chr1:182352796-182352737	NM_002065	Hs.518525
A_21_P0014339	2.23493	1.16023	2.23493	up	lnc-AC009113.1-1	lnc-AC009113.1-1:2	FALSE	LNCipedia lincRNA (lnc-AC009113.1-1), lincRNA [lnc-AC009113.1-1:2]			89364724	chr16	89364666	+	hs|16q24.3		chr16:89364666-89364724
A_33_P3259740	3.12679	1.64468	3.12679	up	LOC400661	uncharacterized LOC400661	FALSE	Homo sapiens uncharacterized LOC400661 (LOC400661), long non-coding RNA [NR_122073]	400661		74402460	chr18	74402401	+	hs|18q23	NR_122073	chr18:74402401-74402460	NR_122073	Hs.514963
A_23_P119562	2.11437	1.08023	2.11437	up	CFD	complement factor D (adipsin)	FALSE	Homo sapiens complement factor D (adipsin) (CFD), mRNA [NM_001928]	1675	GO:0004252|GO:0030168|GO:0005576|GO:0005615|GO:0006957|GO:0006956|GO:0007596|GO:0045087|GO:0002576|GO:0006508|GO:0008236|GO:0031093|GO:0070062	863306	chr19	863247	+	hs|19p13.3	NM_001928	chr19:863247-863306	NM_001928	Hs.155597
A_33_P3310276	4.51826	2.17577	4.51826	up	PIWIL2	piwi-like RNA-mediated gene silencing 2	FALSE	PREDICTED: Homo sapiens piwi-like RNA-mediated gene silencing 2 (PIWIL2), transcript variant X2, mRNA [XM_005273551]	55124	GO:0010467|GO:0051321|GO:0048477|GO:0000966|GO:0045727|GO:0007275|GO:0007283|GO:0031047|GO:0034584|GO:0003729|GO:0033391|GO:0005737|GO:0034587|GO:0071546|GO:0043186|GO:0060903|GO:0005844|GO:0030718|GO:0043046	22179436	chr8	22179377	+	hs|8p21.3	XM_005273551	chr8:22179377-22179436	XM_005273551
A_33_P3353816	3.58486	1.84192	3.58486	up	ITGA4	integrin, alpha 4 (antigen CD49D, alpha 4 subunit of VLA-4 receptor)	FALSE	Homo sapiens integrin, alpha 4 (antigen CD49D, alpha 4 subunit of VLA-4 receptor) (ITGA4), mRNA [NM_000885]	3676	GO:0005515|GO:0060710|GO:0005886|GO:0050900|GO:0035987|GO:0050901|GO:0046872|GO:0007507|GO:0034669|GO:0005911|GO:0030198|GO:0030183|GO:0007159|GO:0034446|GO:0034113|GO:0001968|GO:0050839|GO:0007157|GO:0070062|GO:0003366|GO:0090074|GO:0009986|GO:0072678|GO:0007160|GO:0016020|GO:0007596|GO:0007229|GO:0001974|GO:0060324|GO:0050776|GO:0043113|GO:0005925|GO:0009897	182402334	chr2	182402275	+	hs|2q31.3	NM_000885	chr2:182402275-182402334	NM_000885	Hs.440955
A_21_P0001752	2.75387	1.46146	2.75387	up	lnc-FAIM3-1	lnc-FAIM3-1:1	FALSE	LNCipedia lincRNA (lnc-FAIM3-1), lincRNA [lnc-FAIM3-1:1]			207096931	chr1	207096872	-	hs|1q32.1		chr1:207096931-207096872
A_21_P0010554	2.20275	1.13931	2.20275	up	LOC101927345	uncharacterized LOC101927345	FALSE	PREDICTED: Homo sapiens uncharacterized LOC101927345 (LOC101927345), ncRNA [XR_246983]	101927345		10208114	chr21	10205238	-	hs|21p11.2		chr21:10208114-10205238	XR_246983
A_33_P3415300	4.73114	2.24219	4.73114	up	CPLX2	complexin 2	FALSE	Homo sapiens complexin 2 (CPLX2), transcript variant 1, mRNA [NM_006650]	10814	GO:0043303|GO:0045202|GO:0016079|GO:0030154|GO:0030425|GO:0042629|GO:0005829|GO:0006904|GO:0007399|GO:0031915|GO:0017157|GO:0043025|GO:0017075|GO:0070554|GO:0070033|GO:0048306	175307048	chr5	175306989	+	hs|5q35.2	NM_006650	chr5:175306989-175307048	NM_006650	Hs.193235
A_33_P3350207	2.0147	1.01056	2.0147	up	HCFC1R1	host cell factor C1 regulator 1 (XPO1 dependent)	FALSE	Homo sapiens host cell factor C1 regulator 1 (XPO1 dependent) (HCFC1R1), transcript variant 1, mRNA [NM_017885]	54985	GO:0005737|GO:0005654	3072685	chr16	3072626	-	hs|16p13.3	NM_017885	chr16:3072685-3072626	NM_017885	Hs.423103
A_33_P3303309	6.17179	2.62569	6.17179	up	LINC01105	long intergenic non-protein coding RNA 1105	FALSE	Homo sapiens long intergenic non-protein coding RNA 1105 (LINC01105), long non-coding RNA [NR_026832]	150622		6112581	chr2	6112522	+	hs|2p25.2	NR_026832	chr2:6112522-6112581	NR_026832	Hs.560891
A_21_P0002140	2.17268	1.11947	2.17268	up	lnc-OBSL1-1	lnc-OBSL1-1:1	FALSE	LNCipedia lincRNA (lnc-OBSL1-1), lincRNA [lnc-OBSL1-1:1]			220489840	chr2	220489781	-	hs|2q35		chr2:220489840-220489781
A_21_P0000183	6.13877	2.61795	6.13877	up	RRS1-AS1	RRS1 antisense RNA 1 (head to head)	FALSE	Homo sapiens RRS1 antisense RNA 1 (head to head) (RRS1-AS1), long non-coding RNA [NR_040434]	100505676		67332026	chr8	67331967	-	hs|8q13.1	NR_040434	chr8:67332026-67331967	NR_040434	Hs.121613
A_23_P204736	2.03044	1.02179	2.03044	up	GPD1	glycerol-3-phosphate dehydrogenase 1 (soluble)	FALSE	Homo sapiens glycerol-3-phosphate dehydrogenase 1 (soluble) (GPD1), transcript variant 1, mRNA [NM_005276]	2819	GO:0009331|GO:0004368|GO:0006094|GO:0004367|GO:0044281|GO:0042803|GO:0046168|GO:0005829|GO:0005739|GO:0006127|GO:0051287|GO:0071356|GO:0006116|GO:0019432|GO:0071320|GO:0045821|GO:0006644|GO:0006654|GO:0044255|GO:0070062|GO:0046474	50504684	chr12	50504625	+	hs|12q13.12	NM_005276	chr12:50504625-50504684	NM_005276	Hs.524418
A_23_P58407	2.13914	1.09703	2.13914	up	UGT2B15	UDP glucuronosyltransferase 2 family, polypeptide B15	FALSE	Homo sapiens UDP glucuronosyltransferase 2 family, polypeptide B15 (UGT2B15), mRNA [NM_001076]	7366	GO:0052696|GO:0006805|GO:0052695|GO:0009813|GO:0001972|GO:0005789|GO:0015020|GO:0016021|GO:0032870|GO:0008202|GO:0043231	69512817	chr4	69512758	-	hs|4q13.2	NM_001076	chr4:69512817-69512758	NM_001076	Hs.150207
A_24_P204819	7.24688	2.85736	7.24688	up	SPRY3	sprouty homolog 3 (Drosophila)	FALSE	Homo sapiens sprouty homolog 3 (Drosophila) (SPRY3), mRNA [NM_005840]	10251	GO:0003674|GO:0005737|GO:0016020|GO:0007275|GO:0009966	155003982	chrX	155003923	+	hs|Xq28	NM_005840	chrX:155003923-155003982	NM_005840	Hs.381912
A_33_P3241651	4.44327	2.15162	4.44327	up	SYTL4	synaptotagmin-like 4	FALSE	synaptotagmin-like 4 [Source:HGNC Symbol;Acc:HGNC:15588] [ENST00000372981]	94121	GO:0005215|GO:0005813|GO:0017137|GO:0005886|GO:0050714|GO:0006887|GO:0042043|GO:0006886|GO:0008021|GO:0045921|GO:0005737|GO:0071985|GO:0005543|GO:0005654|GO:0008270|GO:0030141|GO:0046676|GO:0030658|GO:0005768|GO:0019898	99940070	chrX	99940011	-	hs|Xq22.1	AL832596	chrX:99940070-99940011
A_21_P0009171	2.41896	1.27439	2.41896	up			FALSE	CR739285 Soares_fetal_heart_NbHH19W Homo sapiens cDNA clone IMAGp971F1233 ; IMAGE:341982 5', mRNA sequence [CR739285]			48094077	chr17	48094018	+	hs|17q21.33		chr17:48094018-48094077		Hs.569815
A_33_P3376546	2.63249	1.39643	2.63249	up	PTGFR	prostaglandin F receptor (FP)	FALSE	Homo sapiens prostaglandin F receptor (FP) (PTGFR), transcript variant 2, mRNA [NM_001039585]	5737	GO:0043066|GO:0008284|GO:0005737|GO:0035584|GO:0007567|GO:0007186|GO:0005886|GO:0005887|GO:0071799|GO:0032496|GO:0005576|GO:0004958	79006355	chr1	79006296	+	hs|1p31.1	NM_001039585	chr1:79006296-79006355	NM_001039585	Hs.654365
A_33_P3360758	3.23141	1.69216	3.23141	up			FALSE				62044411	chr20	62044352	-	hs|20q13.33		chr20:062044411-062044352
A_21_P0008727	4.76953	2.25385	4.76953	up			FALSE				39592722	chr15	39592663	-	hs|15q14		chr15:39592722-39592663		Hs.123495
A_33_P3221828	2.03381	1.02419	2.03381	up			FALSE	Homo sapiens cDNA FLJ31666 fis, clone NT2RI2004783. [AK056228]			3407385	chr12	3407326	-	hs|12p13.32	AK056228	chr12:3407385-3407326		Hs.447497
A_21_P0013893	2.03618	1.02586	2.03618	up			FALSE	RNA, 45S pre-ribosomal 5 [Source:HGNC Symbol;Acc:HGNC:44273] [ENST00000445125]			10036241	chrY	10036182	-	hs|Yp11.2		chrY:10036241-10036182
A_23_P37167	2.07818	1.05532	2.07818	up	MYH6	myosin, heavy chain 6, cardiac muscle, alpha	FALSE	Homo sapiens myosin, heavy chain 6, cardiac muscle, alpha (MYH6), mRNA [NM_002471]	4624	GO:0005516|GO:0030018|GO:0055010|GO:0006200|GO:0008016|GO:0006941|GO:0060420|GO:0016459|GO:0030016|GO:0030898|GO:0030017|GO:0005829|GO:0007512|GO:0005737|GO:0000146|GO:0006936|GO:0043462|GO:0030239|GO:0005859|GO:0060070|GO:0016887|GO:0055009|GO:0001725|GO:0030049|GO:0019901|GO:0045214|GO:0003779|GO:0030509|GO:0007522|GO:0005524|GO:0001701|GO:0048739|GO:0032982|GO:0002027|GO:0002026|GO:0008217|GO:…	23854238	chr14	23854179	-	hs|14q11.2	NM_002471	chr14:23854238-23854179	NM_002471	Hs.278432
A_33_P3419970	8.78901	3.1357	8.78901	up	NPB	neuropeptide B	FALSE	Homo sapiens neuropeptide B (NPB), mRNA [NM_148896]	256933	GO:0005515|GO:0001664|GO:0007186|GO:0007218|GO:0005576	79860776	chr17	79860717	+	hs|17q25.3	NM_148896	chr17:79860717-79860776	NM_148896	Hs.708916
A_21_P0002276	2.07598	1.0538	2.07598	up	lnc-INSIG2-3	lnc-INSIG2-3:1	FALSE	LNCipedia lincRNA (lnc-INSIG2-3), lincRNA [lnc-INSIG2-3:1]			118983427	chr2	118982974	+	hs|2q14.2		chr2:118982974-118983427
A_21_P0005539	4.04592	2.01647	4.04592	up	lnc-ACTR3C-2	lnc-ACTR3C-2:2	FALSE	LNCipedia lincRNA (lnc-ACTR3C-2), lincRNA [lnc-ACTR3C-2:2]			149917350	chr7	149903393	-	hs|7q36.1		chr7:149917350-149903393
A_33_P3257817	2.38007	1.251	2.38007	up	LOC102723701	uncharacterized LOC102723701	FALSE	Homo sapiens uncharacterized LOC102723701 (LOC102723701), long non-coding RNA [NR_125821]	102723701		37592362	chr8	37592303	-	hs|8p11.23	NR_125821	chr8:37592362-37592303	NR_125821	Hs.588388
A_33_P3345132	2.00614	1.00442	2.00614	up	ZNF578	zinc finger protein 578	FALSE	Homo sapiens zinc finger protein 578 (ZNF578), mRNA [NM_001099694]	147660	GO:0006355|GO:0005737|GO:0005634|GO:0003677|GO:0046872|GO:0006351	53019378	chr19	53019319	+	hs|19q13.41	NM_001099694	chr19:53019319-53019378	NM_001099694	Hs.157287
A_21_P0000615	2.3048	1.20464	2.3048	up	LINC00184	long intergenic non-protein coding RNA 184	FALSE	Homo sapiens long intergenic non-protein coding RNA 184 (LINC00184), long non-coding RNA [NR_033927]	100302691		234770508	chr1	234770449	+	hs|1q42.3	NR_033927	chr1:234770449-234770508	NR_033927	Hs.209162
A_33_P3364808	2.36371	1.24105	2.36371	up	PTPRC	protein tyrosine phosphatase, receptor type, C	FALSE	Homo sapiens protein tyrosine phosphatase, receptor type, C (PTPRC), transcript variant 1, mRNA [NM_002838]	5788	GO:0050853|GO:0005515|GO:0050852|GO:0050857|GO:0005886|GO:0030890|GO:0048539|GO:0048864|GO:0035335|GO:0002378|GO:0051607|GO:0006470|GO:0001960|GO:0005001|GO:0002244|GO:0007411|GO:0042100|GO:0006933|GO:0045860|GO:0042102|GO:0051726|GO:0004725|GO:0070062|GO:0051209|GO:0019901|GO:2000648|GO:0016020|GO:0030217|GO:0005887|GO:0016311|GO:0001915|GO:0045121|GO:0006469|GO:2000473|GO:0005925|GO:0007166|GO:…	198671583	chr1	198671524	+	hs|1q31.3	NM_002838	chr1:198671524-198671583	NM_002838	Hs.654514
A_33_P3361388	2.38779	1.25568	2.38779	up	MYCBPAP	MYCBP associated protein	FALSE	Homo sapiens MYCBP associated protein (MYCBPAP), mRNA [NM_032133]	84073	GO:0005515|GO:0005737|GO:0016020|GO:0007268|GO:0007275|GO:0007283|GO:0030154	48608810	chr17	48608751	+	hs|17q21.33	NM_032133	chr17:48608751-48608810	NM_032133	Hs.398196
A_23_P171107	2.00845	1.00608	2.00845	up	CCNB3	cyclin B3	FALSE	Homo sapiens cyclin B3 (CCNB3), transcript variant 3, mRNA [NM_033031]	85417	GO:0005515|GO:0051321|GO:0019901|GO:0010389|GO:0005654|GO:0000079|GO:0051301	50094750	chrX	50094691	+	hs|Xp11.22	NM_033031	chrX:50094691-50094750	NM_033031	Hs.130310
A_21_P0003304	2.40516	1.26613	2.40516	up	LOC102724604	uncharacterized LOC102724604	FALSE	Homo sapiens uncharacterized LOC102724604 (LOC102724604), long non-coding RNA [NR_125407]	102724604		181156452	chr3	181156393	-	hs|3q26.33	NR_125407	chr3:181156452-181156393	NR_125407	Hs.570524
A_23_P142075	2.10897	1.07654	2.10897	up	ACP5	acid phosphatase 5, tartrate resistant	FALSE	Homo sapiens acid phosphatase 5, tartrate resistant (ACP5), transcript variant 4, mRNA [NM_001611]	54	GO:0050830|GO:0045453|GO:0003993|GO:0032691|GO:0032929|GO:0032720|GO:0006767|GO:0044281|GO:0005764|GO:0008198|GO:0005829|GO:0008199|GO:0006771|GO:0045019|GO:0006766|GO:0032695|GO:0060349|GO:0050728|GO:0016311|GO:0032496|GO:0016021|GO:0034097|GO:0070062	11685584	chr19	11685525	-	hs|19p13.2	NM_001611	chr19:11685584-11685525	NM_001611	Hs.1211
A_21_P0001168	4.28616	2.09969	4.28616	up	LOC100996263	uncharacterized LOC100996263	FALSE	Homo sapiens uncharacterized LOC100996263 (LOC100996263), long non-coding RNA [NR_121626]	100996263		118147480	chr1	118147421	-	hs|1p12	NR_121626	chr1:118147480-118147421	NR_121626
A_19_P00316241	2.80078	1.48583	2.80078	up	LOC101928858	uncharacterized LOC101928858	FALSE	PREDICTED: Homo sapiens uncharacterized LOC101928858 (RP11-434D9.1), transcript variant X3, ncRNA [XR_427726]	101928858		67100735	chr5	67100676	+	hs|5q13.1	XR_427726	chr5:67100676-67100735	XR_427726
A_33_P3375541	2.47472	1.30727	2.47472	up	CD3D	CD3d molecule, delta (CD3-TCR complex)	FALSE	Homo sapiens CD3d molecule, delta (CD3-TCR complex) (CD3D), transcript variant 1, mRNA [NM_000732]	915	GO:0050852|GO:0005886|GO:0046982|GO:0003713|GO:0031295|GO:0045059|GO:0005737|GO:0042105|GO:0030217|GO:0042101|GO:0045944|GO:0050776|GO:0016021|GO:0007166|GO:0004888	118209862	chr11	118209803	-	hs|11q23.3	NM_000732	chr11:118209862-118209803	NM_000732	Hs.504048
A_21_P0011779	3.04443	1.60617	3.04443	up	LINC00665	long intergenic non-protein coding RNA 665	FALSE	long intergenic non-protein coding RNA 665 [Source:HGNC Symbol;Acc:HGNC:44323] [ENST00000590657]	100506930		36804703	chr19	36804644	-	hs|19q13.12	XR_424981	chr19:36804703-36804644	XR_424981	Hs.595153
A_23_P42306	2.04089	1.0292	2.04089	up	HLA-DMA	major histocompatibility complex, class II, DM alpha	FALSE	Homo sapiens major histocompatibility complex, class II, DM alpha (HLA-DMA), mRNA [NM_006120]	3108	GO:0048839|GO:0016064|GO:0009986|GO:0005771|GO:0002503|GO:0042613|GO:0005765|GO:0015031|GO:0045059|GO:0019886|GO:0016020|GO:0050778|GO:0031902|GO:0051085|GO:0023026|GO:0016021|GO:0045582|GO:0070062	32916625	chr6	32916566	-	hs|6p21.32	NM_006120	chr6:32916625-32916566	NM_006120	Hs.728759
A_33_P3387561	8.22595	3.04018	8.22595	up	OSCAR	osteoclast associated, immunoglobulin-like receptor	FALSE	Homo sapiens osteoclast associated, immunoglobulin-like receptor (OSCAR), transcript variant 1, mRNA [NM_206818]	126014	GO:0005886|GO:0016021|GO:0070062	54599098	chr19	54599039	-	hs|19q13.42	NM_206818	chr19:54599098-54599039	NM_206818	Hs.347655
A_32_P71571	7.12065	2.83201	7.12065	up	FAM19A4	family with sequence similarity 19 (chemokine (C-C motif)-like), member A4	FALSE	Homo sapiens family with sequence similarity 19 (chemokine (C-C motif)-like), member A4 (FAM19A4), transcript variant 1, mRNA [NM_182522]	151647	GO:0042391|GO:0005576|GO:0051930	68781029	chr3	68780970	-	hs|3p14.1	NM_182522	chr3:68781029-68780970	NM_182522	Hs.187873
A_23_P399146	2.29789	1.20031	2.29789	up	ZNF549	zinc finger protein 549	FALSE	Homo sapiens zinc finger protein 549 (ZNF549), transcript variant 2, mRNA [NM_153263]	256051	GO:0006355|GO:0005634|GO:0003677|GO:0046872|GO:0006351	58051712	chr19	58051653	+	hs|19q13.43	NM_153263	chr19:58051653-58051712	NM_153263	Hs.744289
A_21_P0009502	2.78774	1.4791	2.78774	up	lnc-RP11-17M16.1.1-7	lnc-RP11-17M16.1.1-7:3	FALSE	LNCipedia lincRNA (lnc-RP11-17M16.1.1-7), lincRNA [lnc-RP11-17M16.1.1-7:3]			73933716	chr18	73933657	+	hs|18q23		chr18:73933657-73933716
A_23_P83835	4.03786	2.01359	4.03786	up	POMK	protein-O-mannose kinase	FALSE	Homo sapiens protein-O-mannose kinase (POMK), transcript variant 1, mRNA [NM_032237]	84197	GO:0019200|GO:0005524|GO:0019233|GO:0050905|GO:0004672|GO:0006493|GO:0007420|GO:0005789|GO:0007611|GO:0016773|GO:0046835|GO:0006468|GO:0016021|GO:0001764	42977928	chr8	42977869	+	hs|8p11.21	NM_032237	chr8:42977869-42977928	NM_032237	Hs.491646
A_24_P381199	2.27382	1.18512	2.27382	up	TRIM6	tripartite motif containing 6	FALSE	Homo sapiens tripartite motif containing 6 (TRIM6), transcript variant 1, mRNA [NM_001003818]	117854	GO:0003674|GO:0070206|GO:0005737|GO:0008270	5633926	chr11	5633867	+	hs|11p15.4	NM_001003818	chr11:5633867-5633926	NM_001003818	Hs.729048
A_24_P14731	7.22075	2.85215	7.22075	up	PCSK1N	proprotein convertase subtilisin/kexin type 1 inhibitor	FALSE	Homo sapiens proprotein convertase subtilisin/kexin type 1 inhibitor (PCSK1N), mRNA [NM_013271]	27344	GO:0010951|GO:0005802|GO:0016486|GO:0004866|GO:0007218|GO:0004867|GO:0009409|GO:0005102|GO:0030141|GO:0005615|GO:0002021|GO:0070062	48690521	chrX	48690462	-	hs|Xp11.23	NM_013271	chrX:48690521-48690462	NM_013271	Hs.522640
A_21_P0000935	2.14135	1.09852	2.14135	up			FALSE	long intergenic non-protein coding RNA 1222 [Source:HGNC Symbol;Acc:HGNC:49672] [ENST00000427439]			198975353	chr1	198975294	-	hs|1q32.1		chr1:198975353-198975294		Hs.568480
A_33_P3452003	2.22325	1.15267	2.22325	up	LOC143286	uncharacterized LOC143286	FALSE	Homo sapiens mRNA; cDNA DKFZp586E171 (from clone DKFZp586E171) [AL049428]	143286		102724881	chr10	102724822	-	hs|10q24.31	AL049428	chr10:102724881-102724822		Hs.705563
A_21_P0014796	2.50451	1.32453	2.50451	up	lnc-CTD-2054N24.2.1-1	lnc-CTD-2054N24.2.1-1:1	FALSE	Q9GLG9_SAGOE (Q9GLG9) CD81 (Fragment), partial (8%) [THC2542372]			100514043	chr15	100513984	+	hs|15q26.3		chr15:100513984-100514043
A_21_P0006511	2.03335	1.02386	2.03335	up	lnc-HTR2C-1	lnc-HTR2C-1:2	FALSE	LNCipedia lincRNA (lnc-HTR2C-1), lincRNA [lnc-HTR2C-1:2]			113220885	chrX	113220826	+	hs|Xq23		chrX:113220826-113220885
A_33_P3793307	2.36193	1.23996	2.36193	up	LOC339803	uncharacterized LOC339803	FALSE	Homo sapiens uncharacterized LOC339803 (LOC339803), long non-coding RNA [NR_036496]	339803		61368978	chr2	61368919	-	hs|2p15	NR_036496	chr2:61368978-61368919	NR_036496	Hs.252433
A_33_P3405114	2.71441	1.44064	2.71441	up	ENHO	energy homeostasis associated	FALSE	Homo sapiens energy homeostasis associated (ENHO), mRNA [NM_198573]	375704	GO:0005576	34521416	chr9	34521357	-	hs|9p13.3	NM_198573	chr9:34521416-34521357	NM_198573	Hs.522085
A_33_P3294177	3.06635	1.61652	3.06635	up	LOC100131043	uncharacterized LOC100131043	FALSE	Homo sapiens cDNA FLJ42228 fis, clone THYMU2041252. [AK124222]	100131043		36723389	chr6	36723330	-	hs|6p21.2	AK124222	chr6:36723389-36723330		Hs.372129
A_19_P00805076	2.94308	1.55733	2.94308	up	LOC102724030	uncharacterized LOC102724030	FALSE	PREDICTED: Homo sapiens uncharacterized LOC102724030 (LOC102724030), transcript variant X1, ncRNA [XR_424361]	102724030		54544432	chr12	54544373	+	hs|12q13.13	XR_424361	chr12:54544373-54544432	XR_424361
A_33_P3270197	2.9663	1.56866	2.9663	up	DIS3L2	DIS3 like 3'-5' exoribonuclease 2	FALSE	Homo sapiens DIS3 like 3'-5' exoribonuclease 2 (DIS3L2), transcript variant 2, mRNA [NM_001257281]	129563	GO:0005515|GO:0034427|GO:0000287|GO:0008285|GO:0000291|GO:0004540|GO:0010587|GO:0008266|GO:0051306|GO:0005737|GO:0007067|GO:0000175|GO:0000932|GO:0019827|GO:0005844|GO:0051301	233128018	chr2	233127959	+	hs|2q37.1	NM_001257281	chr2:233127959-233128018	NM_001257281	Hs.732236
A_21_P0006794	4.09143	2.0326	4.09143	up			FALSE	RST5687 Athersys RAGE Library Homo sapiens cDNA, mRNA sequence [BG186712]			119321674	chr10	119321615	-	hs|10q26.11		chr10:119321674-119321615		Hs.743819
A_33_P3410895	3.13248	1.64731	3.13248	up	POR	P450 (cytochrome) oxidoreductase	FALSE	P450 (cytochrome) oxidoreductase [Source:HGNC Symbol;Acc:HGNC:9208] [ENST00000421059]	5447	GO:0050661|GO:0008941|GO:0005515|GO:0046210|GO:0043602|GO:0060192|GO:0010181|GO:0050660|GO:0047726|GO:0070988|GO:0090346|GO:0043231|GO:0071372|GO:0005739|GO:0045880|GO:0071375|GO:0090031|GO:0032332|GO:0003420|GO:0043154|GO:0009437|GO:0019395|GO:0005506|GO:0004128|GO:0007584|GO:0042493|GO:0009055|GO:0018393|GO:0009812|GO:0003958|GO:0016020|GO:0016787|GO:0005789|GO:0032770|GO:0019899|GO:0045542|GO:…	75544843	chr7	75544784	+	hs|7q11.23		chr7:75544784-75544843
A_33_P3336262	3.04622	1.60702	3.04622	up	CFAP74	cilia and flagella associated protein 74	FALSE	cilia and flagella associated protein 74 [Source:HGNC Symbol;Acc:HGNC:29368] [ENST00000412120]	85452	GO:0035082|GO:0005930	1853767	chr1	1853708	-	hs|1p36.33	XM_006710997	chr1:1853767-1853708	XM_006710997	Hs.259619
A_33_P3308626	6.10698	2.61046	6.10698	up	MON1B	MON1 secretory trafficking family member B	FALSE	Homo sapiens MON1 secretory trafficking family member B (MON1B), transcript variant 1, mRNA [NM_014940]	22879	GO:0005515|GO:0016192|GO:0012505	77229557	chr16	77229498	+	hs|16q23.1	NM_014940	chr16:77229498-77229557	NM_014940	Hs.513743
A_33_P3328659	2.74494	1.45677	2.74494	up	CELSR1	cadherin, EGF LAG seven-pass G-type receptor 1	FALSE	Homo sapiens cadherin, EGF LAG seven-pass G-type receptor 1 (CELSR1), mRNA [NM_014246]	9620	GO:0001736|GO:0005886|GO:0007266|GO:0009952|GO:0042249|GO:0032956|GO:0046983|GO:0007626|GO:0007156|GO:0001942|GO:0060490|GO:0042472|GO:0004930|GO:0090251|GO:0005509|GO:0090179|GO:0001843|GO:0045176|GO:0007417|GO:0007186|GO:0005887|GO:0060489|GO:0042060|GO:0060488|GO:0005654|GO:0016021|GO:0001764|GO:0048105|GO:0004888	46760146	chr22	46760087	-	hs|22q13.31	NM_014246	chr22:46760146-46760087	NM_014246	Hs.252387
A_33_P3231677	2.00429	1.00309	2.00429	up			FALSE				874677	chr2	874618	-	hs|2p25.3		chr2:000874677-000874618
A_23_P53530	2.02238	1.01605	2.02238	up	MTERF2	mitochondrial transcription termination factor 2	FALSE	Homo sapiens mitochondrial transcription termination factor 2 (MTERF2), transcript variant 1, mRNA [NM_001033050]	80298	GO:0042645|GO:0006355|GO:0003690|GO:0044212|GO:0005759|GO:0042803|GO:0006351	107371680	chr12	107371621	-	hs|12q23.3	NM_001033050	chr12:107371680-107371621	NM_001033050	Hs.5009
A_21_P0014882	4.07903	2.02823	4.07903	up			FALSE				55316904	chr1	55316845	+	hs|1p32.3		chr1:055316845-055316904
A_19_P00328996	2.0747	1.05291	2.0747	up	LINC00963	long intergenic non-protein coding RNA 963	FALSE	long intergenic non-protein coding RNA 963 [Source:HGNC Symbol;Acc:HGNC:48716] [ENST00000419300]	100506190		132267423	chr9	132267364	+	hs|9q34.11		chr9:132267364-132267423		Hs.529860
A_19_P00318740	3.05107	1.60932	3.05107	up	LOC101928858	uncharacterized LOC101928858	FALSE	PREDICTED: Homo sapiens uncharacterized LOC101928858 (RP11-434D9.1), transcript variant X3, ncRNA [XR_427726]	101928858		67100688	chr5	67100629	+	hs|5q13.1	XR_427726	chr5:67100629-67100688	XR_427726
A_33_P3351316	3.40589	1.76803	3.40589	up	FAM198A	family with sequence similarity 198, member A	FALSE	family with sequence similarity 198, member A [Source:HGNC Symbol;Acc:HGNC:24485] [ENST00000273146]	729085	GO:0005576	43101699	chr3	43101640	+	hs|3p22.1	AK091001	chr3:43101640-43101699
A_33_P3407564	2.57539	1.36479	2.57539	up			FALSE				53041334	chr6	53041275	+	hs|6p12.1		chr6:053041275-053041334
A_21_P0014577	2.20913	1.14348	2.20913	up	LOC100506869	uncharacterized LOC100506869	FALSE	Homo sapiens uncharacterized LOC100506869 (LOC100506869), long non-coding RNA [NR_126341]	100506869		59206451	chr12	59206392	+	hs|12q14.1	NR_126341	chr12:59206392-59206451	NR_126341	Hs.290456
A_32_P170481	3.06465	1.61572	3.06465	up	LOC100240735	uncharacterized LOC100240735	FALSE	Homo sapiens uncharacterized LOC100240735 (LOC100240735), long non-coding RNA [NR_026658]	100240735		54472968	chr12	54472909	-	hs|12q13.13	NR_026658	chr12:54472968-54472909	NR_026658	Hs.635297
A_33_P3339276	3.04337	1.60567	3.04337	up	ACSM5	acyl-CoA synthetase medium-chain family member 5	FALSE	Homo sapiens acyl-CoA synthetase medium-chain family member 5 (ACSM5), mRNA [NM_017888]	54988	GO:0005759|GO:0006631|GO:0005525|GO:0005524|GO:0047760|GO:0046872	20442643	chr16	20442583	+	hs|16p12.3	NM_017888	chr16:20442583-20442643	NM_017888	Hs.659606
A_21_P0011874	2.04471	1.0319	2.04471	up	XLOC_l2_007767		FALSE	BROAD Institute lincRNA (XLOC_l2_007767), lincRNA [TCONS_l2_00014252]			220363206	chr2	220363147	+	hs|2q35		chr2:220363147-220363206		Hs.710654
A_33_P3312544	2.25447	1.17279	2.25447	up	GABRB1	gamma-aminobutyric acid (GABA) A receptor, beta 1	FALSE	gamma-aminobutyric acid (GABA) A receptor, beta 1 [Source:HGNC Symbol;Acc:HGNC:4081] [ENST00000381582]	2560	GO:0005230|GO:0030054|GO:0005886|GO:0004890|GO:0034707|GO:0007268|GO:0055085|GO:0005254|GO:0007165|GO:0034220|GO:0005887|GO:0045211|GO:0006810|GO:0071420|GO:0006811|GO:0015276	47035030	chr4	47034971	+	hs|4p12	AK296023	chr4:47034971-47035030		Hs.27283
A_23_P97221	2.24774	1.16848	2.24774	up	ZNF691	zinc finger protein 691	FALSE	Homo sapiens zinc finger protein 691 (ZNF691), transcript variant 2, mRNA [NM_015911]	51058	GO:0005634|GO:0003677|GO:0046872	43317858	chr1	43317799	+	hs|1p34.2	NM_015911	chr1:43317799-43317858	NM_015911	Hs.20879
A_21_P0011733	5.05692	2.33826	5.05692	up	LOC100505851	uncharacterized LOC100505851	FALSE	PREDICTED: Homo sapiens uncharacterized LOC100505851 (LOC100505851), misc_RNA [XR_109588]	100505851		24132615	chr19	24132556	-	hs|19p12	XR_109588	chr19:24132615-24132556	XR_109588	Hs.190888
A_23_P93641	2.33678	1.22452	2.33678	up	AKR1B10	aldo-keto reductase family 1, member B10 (aldose reductase)	FALSE	Homo sapiens aldo-keto reductase family 1, member B10 (aldose reductase) (AKR1B10), mRNA [NM_020299]	57016	GO:0005515|GO:0044598|GO:0047718|GO:0045550|GO:0044597|GO:0001758|GO:0007603|GO:0007586|GO:0006081|GO:0001523|GO:0005764|GO:0005829|GO:0004033|GO:0016488|GO:0008202|GO:0070062|GO:0055114	134225998	chr7	134225939	+	hs|7q33	NM_020299	chr7:134225939-134225998	NM_020299	Hs.116724
A_21_P0001811	9.24524	3.20871	9.24524	up	lnc-TRAPPC12-3	lnc-TRAPPC12-3:1	FALSE	LNCipedia lincRNA (lnc-TRAPPC12-3), lincRNA [lnc-TRAPPC12-3:1]			2876363	chr2	2876304	+	hs|2p25.3		chr2:2876304-2876363
A_33_P3347522	3.02159	1.59531	3.02159	up			FALSE				29887696	chr16	29887637	-	hs|16p11.2		chr16:029887696-029887637
A_21_P0009515	2.29322	1.19738	2.29322	up			FALSE				3347919	chr18	3347860	-	hs|18p11.31		chr18:3347919-3347860		Hs.105326
A_33_P3399638	2.44041	1.28712	2.44041	up	ZNF257	zinc finger protein 257	FALSE	Homo sapiens zinc finger protein 257 (ZNF257), mRNA [NM_033468]	113835	GO:0006355|GO:0008270|GO:0005634|GO:0003677|GO:0006351	22273771	chr19	22273712	+	hs|19p12	NM_033468	chr19:22273712-22273771	NM_033468	Hs.283900
A_21_P0010838	2.1011	1.07114	2.1011	up	XLOC_l2_001669		FALSE	BROAD Institute lincRNA (XLOC_l2_001669), lincRNA [TCONS_l2_00003150]			89579359	chr10	89579300	+	hs|10q23.31		chr10:89579300-89579359
A_33_P3285715	3.1067	1.63538	3.1067	up	GLI4	GLI family zinc finger 4	FALSE	GLI family zinc finger 4 [Source:HGNC Symbol;Acc:HGNC:4320] [ENST00000523812]	2738	GO:0008150|GO:0003674|GO:0006355|GO:0003700|GO:0005634|GO:0003677|GO:0046872	144357174	chr8	144357115	+	hs|8q24.3	AB209654	chr8:144357115-144357174
A_19_P00813087	4.2002	2.07046	4.2002	up	LINC01158	long intergenic non-protein coding RNA 1158	FALSE	Homo sapiens long intergenic non-protein coding RNA 1158 (LINC01158), long non-coding RNA [NR_037883]	100506421		105424243	chr2	105424184	-	hs|2q12.1	NR_037883	chr2:105424243-105424184	NR_037883	Hs.437281
A_23_P500353	2.04706	1.03355	2.04706	up	KCNN2	potassium channel, calcium activated intermediate/small conductance subfamily N alpha, member 2	FALSE	Homo sapiens potassium channel, calcium activated intermediate/small conductance subfamily N alpha, member 2 (KCNN2), transcript variant 1, mRNA [NM_021614]	3781	GO:0005516|GO:0030018|GO:0005886|GO:0007268|GO:0030315|GO:0042803|GO:0005790|GO:0016286|GO:0043197|GO:0051393|GO:0043025|GO:0016021|GO:0006813|GO:0015269|GO:0071805	113831894	chr5	113831835	+	hs|5q22.3	NM_021614	chr5:113831835-113831894	NM_021614	Hs.98280
A_24_P21770	2.05353	1.03811	2.05353	up	YPEL4	yippee-like 4 (Drosophila)	FALSE	Homo sapiens yippee-like 4 (Drosophila) (YPEL4), mRNA [NM_145008]	219539	GO:0005730	57413849	chr11	57413790	-	hs|11q12.1	NM_145008	chr11:57413849-57413790	NM_145008	Hs.135978
A_32_P385645	5.57867	2.47992	5.57867	up	OR10J3	olfactory receptor, family 10, subfamily J, member 3	FALSE	Homo sapiens olfactory receptor, family 10, subfamily J, member 3 (OR10J3), mRNA [NM_001004467]	441911	GO:0050911|GO:0050907|GO:0004984|GO:0007186|GO:0005886|GO:0004930|GO:0016021|GO:0004888	159284348	chr1	159284289	-	hs|1q23.2	NM_001004467	chr1:159284348-159284289	NM_001004467	Hs.553833
A_23_P8702	6.05916	2.59912	6.05916	up	PIP	prolactin-induced protein	FALSE	Homo sapiens prolactin-induced protein (PIP), mRNA [NM_002652]	5304	GO:0005515|GO:0070233|GO:0002682|GO:0003779|GO:0005634|GO:0005615|GO:0010628|GO:0016324|GO:0001948|GO:0001895|GO:0019864|GO:0046983|GO:0006508|GO:0004190|GO:0001580|GO:0070062	142836804	chr7	142836745	+	hs|7q34	NM_002652	chr7:142836745-142836804	NM_002652	Hs.99949
A_21_P0010598	3.61758	1.85502	3.61758	up			FALSE				5146594	chr1	5146535	-	hs|1p36.32		chr1:5146594-5146535
A_33_P3214393	8.27692	3.04909	8.27692	up			FALSE	T cell receptor alpha variable 38-2/delta variable 8 [Source:HGNC Symbol;Acc:HGNC:12138] [ENST00000390465]			22749591	chr14	22749532	+	hs|14q11.2	D13074	chr14:22749532-22749591		Hs.495215
A_21_P0003017	3.95056	1.98206	3.95056	up	lnc-NR1I2-1	lnc-NR1I2-1:4	FALSE	LNCipedia lincRNA (lnc-NR1I2-1), lincRNA [lnc-NR1I2-1:4]			119824070	chr3	119824011	+	hs|3q13.33		chr3:119824011-119824070
A_23_P97606	2.91589	1.54394	2.91589	up	GSTM5	glutathione S-transferase mu 5	FALSE	Homo sapiens glutathione S-transferase mu 5 (GSTM5), mRNA [NM_000851]	2949	GO:0006805|GO:0006749|GO:0044281|GO:0004364|GO:0005829	110260478	chr1	110260419	+	hs|1p13.3	NM_000851	chr1:110260419-110260478	NM_000851	Hs.75652
A_19_P00322225	2.27886	1.18831	2.27886	up	LINC01564	long intergenic non-protein coding RNA 1564	FALSE	Homo sapiens long intergenic non-protein coding RNA 1564 (LINC01564), long non-coding RNA [NR_125841]	101927171		53495987	chr6	53495928	+	hs|6p12.1		chr6:53495928-53495987	NR_125841
A_23_P258164	2.01157	1.00832	2.01157	up	CORT	cortistatin	FALSE	Homo sapiens cortistatin (CORT), mRNA [NM_001302]	1325	GO:0001664|GO:0007268|GO:0005184|GO:0007193|GO:0005615	10511747	chr1	10511688	+	hs|1p36.22	NM_001302	chr1:10511688-10511747	NM_001302	Hs.412311
A_23_P152655	5.11963	2.35604	5.11963	up	ICAM2	intercellular adhesion molecule 2	FALSE	Homo sapiens intercellular adhesion molecule 2 (ICAM2), transcript variant 5, mRNA [NM_000873]	3384	GO:0016337|GO:0005178|GO:0016020|GO:0005886|GO:0030198|GO:0005887|GO:0050776|GO:0001931|GO:0007155|GO:0070062	62080019	chr17	62079960	-	hs|17q23.3	NM_000873	chr17:62080019-62079960	NM_000873	Hs.431460
A_21_P0009441	2.29354	1.19758	2.29354	up	lnc-SMCHD1-1	lnc-SMCHD1-1:1	FALSE	LNCipedia lincRNA (lnc-SMCHD1-1), lincRNA [lnc-SMCHD1-1:1]			2637206	chr18	2637147	+	hs|18p11.32		chr18:2637147-2637206
A_33_P3361891	6.90042	2.78668	6.90042	up	TMPRSS7	transmembrane protease, serine 7	FALSE	Homo sapiens transmembrane protease, serine 7 (TMPRSS7), transcript variant 1, mRNA [NM_001042575]	344805	GO:0005886|GO:0004252|GO:0006508|GO:0008236|GO:0016021	111799944	chr3	111799885	+	hs|3q13.2	NM_001042575	chr3:111799885-111799944	NM_001042575	Hs.435490
A_33_P3303394	3.37282	1.75395	3.37282	up			FALSE				55208895	chr17	55208836	-	hs|17q22		chr17:055208895-055208836
A_21_P0004478	2.61959	1.38934	2.61959	up	LOC102724758	uncharacterized LOC102724758	FALSE	PREDICTED: Homo sapiens uncharacterized LOC102724758 (LOC102724758), ncRNA [XR_425942]	102724758		180254027	chr5	180253968	-	hs|5q35.3	XR_425942	chr5:180254027-180253968	XR_425942
A_33_P3312504	2.54792	1.34932	2.54792	up	PSD4	pleckstrin and Sec7 domain containing 4	FALSE	Homo sapiens pleckstrin and Sec7 domain containing 4 (PSD4), mRNA [NM_012455]	23550	GO:0043547|GO:0005802|GO:0005086|GO:0030054|GO:0005543|GO:0016020|GO:0005886|GO:0030182|GO:0032012|GO:0016192	113958907	chr2	113958848	+	hs|2q13	NM_012455	chr2:113958848-113958907	NM_012455	Hs.516306
A_23_P146551	3.91406	1.96867	3.91406	up	MOB3B	MOB kinase activator 3B	FALSE	Homo sapiens MOB kinase activator 3B (MOB3B), mRNA [NM_024761]	79817	GO:0005515|GO:0046872	27329679	chr9	27329620	-	hs|9p21.2	NM_024761	chr9:27329679-27329620	NM_024761	Hs.369022
A_33_P3346610	2.79162	1.4811	2.79162	up			FALSE				80786544	chr17	80786485	+	hs|17q25.3		chr17:080786485-080786544
A_33_P3374035	2.21677	1.14846	2.21677	up	PDXK	pyridoxal (pyridoxine, vitamin B6) kinase	FALSE	Homo sapiens cDNA FLJ37311 fis, clone BRAMY2016771. [AK094630]	8566	GO:0042823|GO:0000287|GO:0008283|GO:0042816|GO:0006767|GO:0008478|GO:0005634|GO:0044281|GO:0030955|GO:0031402|GO:0031403|GO:0005524|GO:0042803|GO:0005829|GO:0016310|GO:0005737|GO:0006766|GO:0030170|GO:0005654|GO:0008270|GO:0009443|GO:0070062	45156855	chr21	45156796	+	hs|21q22.3	AK094630	chr21:45156796-45156855		Hs.284491
A_21_P0004384	4.41568	2.14264	4.41568	up	lnc-CCL28-1	lnc-CCL28-1:1	FALSE	LNCipedia lincRNA (lnc-CCL28-1), lincRNA [lnc-CCL28-1:1]			43357211	chr5	43357152	-	hs|5p12		chr5:43357211-43357152
A_21_P0014334	3.45966	1.79063	3.45966	up	LOC101928557	uncharacterized LOC101928557	FALSE	PREDICTED: Homo sapiens uncharacterized LOC101928557 (LOC101928557), transcript variant X1, ncRNA [XR_243490]	101928557		85826505	chr16	85826446	+	hs|16q24.1	XR_243490	chr16:85826446-85826505	XR_243490
A_23_P379475	2.01783	1.01281	2.01783	up	DHCR24	24-dehydrocholesterol reductase	FALSE	Homo sapiens 24-dehydrocholesterol reductase (DHCR24), mRNA [NM_014762]	1718	GO:0006695|GO:0008285|GO:0008762|GO:0005783|GO:0050660|GO:0007265|GO:0005634|GO:0044281|GO:0016628|GO:0005829|GO:0030539|GO:0008104|GO:0050614|GO:0042605|GO:0009888|GO:0061024|GO:0007050|GO:0009725|GO:0043154|GO:0005856|GO:0006979|GO:0042987|GO:0043066|GO:0000246|GO:0006915|GO:0000139|GO:0016020|GO:0005789|GO:0031639|GO:0043588|GO:0016021|GO:0019899|GO:0055114	55315569	chr1	55315510	-	hs|1p32.3	NM_014762	chr1:55315569-55315510	NM_014762	Hs.498727
A_23_P216596	2.33589	1.22398	2.33589	up	SVEP1	sushi, von Willebrand factor type A, EGF and pentraxin domain containing 1	FALSE	Homo sapiens sushi, von Willebrand factor type A, EGF and pentraxin domain containing 1 (SVEP1), mRNA [NM_153366]	79987	GO:0005737|GO:0016020|GO:0005509|GO:0005576|GO:0007155	113137663	chr9	113132253	-	hs|9q31.3	NM_153366	chr9:113137663-113132253	NM_153366	Hs.522334
A_24_P37887	3.64641	1.86648	3.64641	up	GPR150	G protein-coupled receptor 150	FALSE	Homo sapiens G protein-coupled receptor 150 (GPR150), mRNA [NM_199243]	285601	GO:0007186|GO:0005886|GO:0004930|GO:0016021	94957261	chr5	94957202	+	hs|5q15	NM_199243	chr5:94957202-94957261	NM_199243	Hs.143315
A_33_P3308553	2.03993	1.02852	2.03993	up			FALSE				194142265	chr2	194142206	-	hs|2q32.3		chr2:194142265-194142206
A_21_P0004470	2.1353	1.09444	2.1353	up	lnc-DUSP1-1	lnc-DUSP1-1:1	FALSE	LNCipedia lincRNA (lnc-DUSP1-1), lincRNA [lnc-DUSP1-1:1]			172233592	chr5	172233533	-	hs|5q35.1		chr5:172233592-172233533
A_21_P0009933	2.80105	1.48597	2.80105	up	lnc-C20orf187-2	lnc-C20orf187-2:1	FALSE	LNCipedia lincRNA (lnc-C20orf187-2), lincRNA [lnc-C20orf187-2:1]			10847750	chr20	10847691	+	hs|20p12.2		chr20:10847691-10847750
A_33_P3278058	2.10734	1.07542	2.10734	up	PIH1D2	PIH1 domain containing 2	FALSE	Homo sapiens PIH1 domain containing 2 (PIH1D2), transcript variant 1, mRNA [NM_138789]	120379	GO:0017160	111941220	chr11	111941161	-	hs|11q23.1	NM_138789	chr11:111941220-111941161	NM_138789	Hs.420662
A_21_P0007867	32.913	5.04058	32.913	up	lnc-FBXL14-2	lnc-FBXL14-2:2	FALSE	LNCipedia lincRNA (lnc-FBXL14-2), lincRNA [lnc-FBXL14-2:2]			1764127	chr12	1764068	-	hs|12p13.33		chr12:1764127-1764068
A_21_P0007619	2.22142	1.15148	2.22142	up			FALSE				104571302	chr12	104565763	+	hs|12q23.3		chr12:104565763-104571302		Hs.524686
A_33_P3343473	2.1158	1.0812	2.1158	up	ATRNL1	attractin-like 1	FALSE	Homo sapiens attractin-like 1 (ATRNL1), transcript variant 1, mRNA [NM_207303]	26033	GO:0007186|GO:0030246|GO:0007275|GO:0004872|GO:0016021	117309035	chr10	117308976	+	hs|10q25.3	NM_207303	chr10:117308976-117309035	NM_207303	Hs.501127
A_33_P3283709	2.35877	1.23803	2.35877	up			FALSE	zinc finger protein 861, pseudogene [Source:HGNC Symbol;Acc:HGNC:34514] [ENST00000588126]			15932862	chr19	15932803	-	hs|19p13.12		chr19:15932862-15932803
A_19_P00316202	3.02999	1.59931	3.02999	up	lnc-TP53INP1-1	lnc-TP53INP1-1:1	FALSE	Homo sapiens hypothetical protein LOC286149, mRNA (cDNA clone IMAGE:40114544). [BC128221]			96085368	chr8	96085309	-	hs|8q22.1	BC128221	chr8:96085368-96085309		Hs.665518
A_19_P00322420	2.76117	1.46528	2.76117	up	LINC01094	long intergenic non-protein coding RNA 1094	FALSE	long intergenic non-protein coding RNA 1094 [Source:HGNC Symbol;Acc:HGNC:49219] [ENST00000503259]	100505702		79584344	chr4	79584285	+	hs|4q21.21		chr4:79584285-79584344
A_33_P3384710	13.8251	3.78922	13.8251	up	FAM222B	family with sequence similarity 222, member B	FALSE	Homo sapiens family with sequence similarity 222, member B (FAM222B), transcript variant 3, mRNA [NM_001288631]	55731	GO:0005654	27085347	chr17	27085288	-	hs|17q11.2	NM_001288631	chr17:27085347-27085288	NM_001288631	Hs.564533
A_23_P16225	2.22922	1.15654	2.22922	up	BEST2	bestrophin 2	FALSE	Homo sapiens bestrophin 2 (BEST2), mRNA [NM_017682]	54831	GO:0008150|GO:0007608|GO:0005929|GO:0003674|GO:0051899|GO:0005886|GO:0034707|GO:0005254	12869040	chr19	12868981	+	hs|19p13.2	NM_017682	chr19:12868981-12869040	NM_017682	Hs.435611
A_21_P0010713	2.18128	1.12517	2.18128	up	lnc-PROK1-1	lnc-PROK1-1:2	FALSE	QV3-NT0217-081200-507-b09 NT0217 Homo sapiens cDNA, mRNA sequence [BF929486]			110960988	chr1	110960929	+	hs|1p13.3		chr1:110960929-110960988		Hs.620825
A_23_P62336	2.14231	1.09917	2.14231	up	CPXCR1	CPX chromosome region, candidate 1	FALSE	Homo sapiens CPX chromosome region, candidate 1 (CPXCR1), transcript variant 1, mRNA [NM_033048]	53336	GO:0046872	88009727	chrX	88009668	+	hs|Xq21.31	NM_033048	chrX:88009668-88009727	NM_033048	Hs.458292
A_21_P0003620	2.41856	1.27415	2.41856	up	lnc-NPFFR2-2	lnc-NPFFR2-2:1	FALSE	LNCipedia lincRNA (lnc-NPFFR2-2), lincRNA [lnc-NPFFR2-2:1]			73435676	chr4	73435617	+	hs|4q13.3		chr4:73435617-73435676
A_23_P127495	3.48194	1.79989	3.48194	up	BBOX1	butyrobetaine (gamma), 2-oxoglutarate dioxygenase (gamma-butyrobetaine hydroxylase) 1	FALSE	Homo sapiens butyrobetaine (gamma), 2-oxoglutarate dioxygenase (gamma-butyrobetaine hydroxylase) 1 (BBOX1), mRNA [NM_003986]	8424	GO:0005739|GO:0034641|GO:0008336|GO:0005506|GO:0045329|GO:0008270|GO:0044281|GO:0070062|GO:0055114|GO:0005829	27149015	chr11	27148956	+	hs|11p14.2	NM_003986	chr11:27148956-27149015	NM_003986	Hs.591996
A_21_P0014330	2.57554	1.36487	2.57554	up	lnc-CDH16-2	lnc-CDH16-2:1	FALSE	Homo sapiens full length insert cDNA clone ZA79D12. [AF086125]			66875395	chr16	66875336	-	hs|16q22.1	AF086125	chr16:66875395-66875336		Hs.659799
A_33_P3268838	2.52475	1.33614	2.52475	up	CPEB1	cytoplasmic polyadenylation element binding protein 1	FALSE	Homo sapiens cytoplasmic polyadenylation element binding protein 1 (CPEB1), transcript variant 5, mRNA [NM_001288819]	64506	GO:0006397|GO:0032869|GO:0030054|GO:0071456|GO:0014069|GO:0005634|GO:0035925|GO:0072687|GO:0046872|GO:0030425|GO:0005737|GO:0071230|GO:0048168|GO:0000166|GO:0000932|GO:0045211|GO:0007130|GO:2000766|GO:0000900	83212038	chr15	83211979	-	hs|15q25.2	NM_001288819	chr15:83212038-83211979	NM_001288819	Hs.547988
A_23_P18684	2.37284	1.24662	2.37284	up	CLGN	calmegin	FALSE	Homo sapiens calmegin (CLGN), transcript variant 1, mRNA [NM_004362]	1047	GO:0007338|GO:0006461|GO:0044183|GO:0006457|GO:0005783|GO:0005509|GO:0005789|GO:0051082|GO:0016021|GO:0005635|GO:0007339	141310434	chr4	141310375	-	hs|4q31.1	NM_004362	chr4:141310434-141310375	NM_004362	Hs.86368
A_23_P211493	2.0272	1.01949	2.0272	up	TMPRSS6	transmembrane protease, serine 6	FALSE	Homo sapiens transmembrane protease, serine 6 (TMPRSS6), transcript variant 2, mRNA [NM_153609]	164656	GO:0035556|GO:0030514|GO:0005515|GO:0005886|GO:0004252|GO:0030198|GO:0006508|GO:0016021|GO:0001525|GO:0055072|GO:0042730	37461812	chr22	37461753	-	hs|22q12.3	NM_153609	chr22:37461812-37461753	NM_153609	Hs.370885
A_33_P3315134	3.99896	1.99963	3.99896	up	DIRC3	disrupted in renal carcinoma 3	FALSE	Homo sapiens disrupted in renal carcinoma 3 (DIRC3), long non-coding RNA [NR_026597]	729582		218148860	chr2	218148801	-	hs|2q35	NR_026597	chr2:218148860-218148801	NR_026597	Hs.572788
A_33_P3233318	3.57916	1.83962	3.57916	up			FALSE				158785184	chr7	158785125	-	hs|7q36.3		chr7:158785184-158785125
A_33_P3423185	3.93366	1.97587	3.93366	up	LOC102725171	uncharacterized LOC102725171	FALSE	PREDICTED: Homo sapiens uncharacterized LOC102725171 (LOC102725171), ncRNA [XR_432995]	102725171		73079235	chr14	73079176	-	hs|14q24.2	XR_432995	chr14:73079235-73079176	XR_432995	Hs.162868
A_23_P94412	2.93788	1.55478	2.93788	up	PDCD1LG2	programmed cell death 1 ligand 2	FALSE	Homo sapiens programmed cell death 1 ligand 2 (PDCD1LG2), mRNA [NM_025239]	80380	GO:0003674|GO:0006955|GO:0005886|GO:0032693|GO:0046007|GO:0042102|GO:0031295|GO:0016021|GO:0032689|GO:0070062|GO:0012505	5557628	chr9	5549556	+	hs|9p24.1	NM_025239	chr9:5549556-5557628	NM_025239	Hs.532279
A_21_P0014370	2.84964	1.51078	2.84964	up			FALSE	BX103273 Soares_testis_NHT Homo sapiens cDNA clone IMAGp998D091862, mRNA sequence [BX103273]			49915431	chr19	49915372	-	hs|19q13.33	BX103273	chr19:49915431-49915372		Hs.373631
A_33_P3374589	2.0071	1.00512	2.0071	up			FALSE	TRNT1_HUMAN (Q96Q11) tRNA-nucleotidyltransferase 1, mitochondrial precursor (Mitochondrial tRNA nucleotidyl transferase, CCA-adding) (mt tRNA adenylyltransferase) (mt tRNA CCA-pyrophosphorylase) (mt tRNA CCA-diphosphorylase) (mt CCA-adding , partial (10%) [THC2652118]			46189618	chr22	46189559	+	hs|22q13.31		chr22:046189559-046189618
A_23_P56356	2.83342	1.50254	2.83342	up	PLB1	phospholipase B1	FALSE	Homo sapiens phospholipase B1 (PLB1), transcript variant 1, mRNA [NM_153021]	151056	GO:0005886|GO:0007603|GO:0044281|GO:0001523|GO:2000344|GO:0016042|GO:0016324|GO:0004622|GO:0004623|GO:0016021|GO:0006644|GO:0036151|GO:0046474	28866105	chr2	28866046	+	hs|2p23.2	NM_153021	chr2:28866046-28866105	NM_153021	Hs.444933
A_33_P3279720	2.33502	1.22343	2.33502	up	ARFRP1	ADP-ribosylation factor related protein 1	FALSE	ADP-ribosylation factor related protein 1 [Source:HGNC Symbol;Acc:HGNC:662] [ENST00000612772]	10139	GO:0005515|GO:0005802|GO:0005794|GO:0007369|GO:0007264|GO:0043001|GO:0003924|GO:0005525|GO:0007165|GO:0016020|GO:0034067|GO:0008152|GO:0042147	62332602	chr20	62332543	-	hs|20q13.33		chr20:62332602-62332543
A_19_P00322953	3.19086	1.67395	3.19086	up			FALSE				130626885	chr2	130626826	-	hs|2q21.1		chr2:130626885-130626826
A_21_P0005267	2.16545	1.11467	2.16545	up	LOC101928733	uncharacterized LOC101928733	FALSE	PREDICTED: Homo sapiens uncharacterized LOC101928733 (LOC101928733), ncRNA [XR_250292]	101928733		149098535	chr7	149098476	+	hs|7q36.1	XR_250292	chr7:149098476-149098535	XR_250292	Hs.131289
A_33_P3268464	3.00619	1.58793	3.00619	up	MPDU1	mannose-P-dolichol utilization defect 1	FALSE	Homo sapiens cDNA FLJ14836 fis, clone OVARC1001702. [AK027742]	9526	GO:0005739|GO:0009312|GO:0016020|GO:0006457|GO:0005783|GO:0006810|GO:0005789|GO:0016021|GO:0006488|GO:0070062	7491705	chr17	7491646	+	hs|17p13.1	AK027742	chr17:7491646-7491705
A_19_P00801627	2.02825	1.02023	2.02825	up	ANP32AP1	acidic (leucine-rich) nuclear phosphoprotein 32 family, member A pseudogene 1	FALSE	acidic (leucine-rich) nuclear phosphoprotein 32 family, member A pseudogene 1 [Source:HGNC Symbol;Acc:HGNC:42949] [ENST00000560832]	723972		35530338	chr15	35530279	+	hs|15q14	AK311417	chr15:35530279-35530338		Hs.631698
A_33_P3250394	2.08437	1.05961	2.08437	up	TRPC2	transient receptor potential cation channel, subfamily C, member 2, pseudogene	FALSE	transient receptor potential cation channel, subfamily C, member 2, pseudogene [Source:HGNC Symbol;Acc:HGNC:12334] [ENST00000451043]	7221		3635953	chr11	3635894	+	hs|11p15.4		chr11:3635894-3635953
A_33_P3280147	4.63279	2.21188	4.63279	up	FLJ45079	FLJ45079 protein	FALSE	Homo sapiens FLJ45079 protein (FLJ45079), long non-coding RNA [NR_028337]	400624		75875293	chr17	75875234	-	hs|17q25.3	NR_028337	chr17:75875293-75875234	NR_028337	Hs.514521
A_23_P68511	14.5393	3.86188	14.5393	up	ANGPT4	angiopoietin 4	FALSE	Homo sapiens angiopoietin 4 (ANGPT4), mRNA [NM_015985]	51378	GO:0030971|GO:0043066|GO:0071456|GO:0050731|GO:0005576|GO:0001525|GO:0050900|GO:0005615|GO:0045766|GO:0010595|GO:0043536|GO:0007171|GO:0030297|GO:0007596|GO:0001935|GO:0016525|GO:0043537	853722	chr20	853663	-	hs|20p13	NM_015985	chr20:853722-853663	NM_015985	Hs.278973
A_23_P369899	2.06999	1.04963	2.06999	up	TMEM158	transmembrane protein 158 (gene/pseudogene)	FALSE	Homo sapiens transmembrane protein 158 (gene/pseudogene) (TMEM158), mRNA [NM_015444]	25907	GO:0042277|GO:0016021	45266206	chr3	45266147	-	hs|3p21.31	NM_015444	chr3:45266206-45266147	NM_015444	Hs.740403
A_21_P0005546	2.15689	1.10895	2.15689	up	lnc-AC099552.4.1-1	lnc-AC099552.4.1-1:2	FALSE	LNCipedia lincRNA (lnc-AC099552.4.1-1), lincRNA [lnc-AC099552.4.1-1:2]			155000806	chr7	155000747	-	hs|7q36.2		chr7:155000806-155000747
A_33_P3403494	2.01599	1.01149	2.01599	up	LOC646743	uncharacterized LOC646743	FALSE	Homo sapiens uncharacterized LOC646743 (LOC646743), non-coding RNA [NR_033930]	646743		131295999	chr2	131295940	-	hs|2q21.1	NR_033930	chr2:131295999-131295940	NR_033930	Hs.634887
A_23_P364324	2.25725	1.17456	2.25725	up	ABCA13	ATP-binding cassette, sub-family A (ABC1), member 13	FALSE	Homo sapiens ATP-binding cassette, sub-family A (ABC1), member 13 (ABCA13), mRNA [NM_152701]	154664	GO:0005215|GO:0008152|GO:0006810|GO:0016021|GO:0016887|GO:0005524	48686913	chr7	48686854	+	hs|7p12.3	NM_152701	chr7:48686854-48686913	NM_152701	Hs.226568
A_23_P55917	2.02734	1.01959	2.02734	up	SYT3	synaptotagmin III	FALSE	Homo sapiens synaptotagmin III (SYT3), transcript variant 1, mRNA [NM_032298]	84258	GO:0019905|GO:0005215|GO:0030054|GO:0031340|GO:0046872|GO:0005544|GO:0051592|GO:0030276|GO:0017156|GO:0001786|GO:0030672|GO:0016021|GO:0005768	51125420	chr19	51125361	-	hs|19q13.33	NM_032298	chr19:51125420-51125361	NM_032298	Hs.515554
A_21_P0009002	2.02409	1.01727	2.02409	up	LOC102724927	uncharacterized LOC102724927	FALSE	Homo sapiens uncharacterized LOC102724927 (LOC102724927), long non-coding RNA [NR_120311]	102724927		4000337	chr16	4000278	-	hs|16p13.3	NR_120311	chr16:4000337-4000278	NR_120311	Hs.364739
A_19_P00319630	2.0702	1.04977	2.0702	up	lnc-SNURF-1	lnc-SNURF-1:8	FALSE	LNCipedia lincRNA (lnc-SNURF-1), lincRNA [lnc-SNURF-1:8]			25272959	chr15	25272900	+	hs|15q11.2		chr15:25272900-25272959
A_33_P3287661	7.22244	2.85249	7.22244	up	lnc-C16orf42-2	lnc-C16orf42-2:1	FALSE	Homo sapiens cDNA FLJ45052 fis, clone BRAWH3022542. [AK126997]			1358800	chr16	1358741	-	hs|16p13.3	AK126997	chr16:1358800-1358741
A_23_P413634	2.15284	1.10624	2.15284	up	ZNF329	zinc finger protein 329	FALSE	Homo sapiens zinc finger protein 329 (ZNF329), mRNA [NM_024620]	79673	GO:0006355|GO:0005634|GO:0003677|GO:0046872|GO:0006351	58637975	chr19	58637916	-	hs|19q13.43	NM_024620	chr19:58637975-58637916	NM_024620	Hs.458377
A_33_P3350643	2.01321	1.0095	2.01321	up	LMX1B	LIM homeobox transcription factor 1, beta	FALSE	Homo sapiens LIM homeobox transcription factor 1, beta (LMX1B), transcript variant 3, mRNA [NM_001174146]	4010	GO:0005515|GO:0006355|GO:0003700|GO:0008283|GO:0021954|GO:0021587|GO:0005634|GO:0007275|GO:0009953|GO:0001701|GO:0006351|GO:0043565|GO:0035265|GO:0071542|GO:0045944|GO:0030199|GO:0030182|GO:0002930|GO:0030901|GO:0008270|GO:0001764|GO:0035108	129463204	chr9	129463145	+	hs|9q33.3	NM_001174146	chr9:129463145-129463204	NM_001174146	Hs.129133
A_21_P0003715	2.71572	1.44134	2.71572	up	lnc-CYTL1-1	lnc-CYTL1-1:1	FALSE	LNCipedia lincRNA (lnc-CYTL1-1), lincRNA [lnc-CYTL1-1:1]			4923889	chr4	4923830	-	hs|4p16.2		chr4:4923889-4923830
A_23_P71379	2.49472	1.31888	2.49472	up	PSCA	prostate stem cell antigen	FALSE	Homo sapiens prostate stem cell antigen (PSCA), transcript variant 1, mRNA [NM_005672]	8000	GO:0005886|GO:0031225|GO:0070062	143764035	chr8	143763976	+	hs|8q24.3	NM_005672	chr8:143763976-143764035	NM_005672	Hs.652235
A_19_P00325158	2.05688	1.04046	2.05688	up	MALAT1	metastasis associated lung adenocarcinoma transcript 1 (non-protein coding)	FALSE	Homo sapiens metastasis associated lung adenocarcinoma transcript 1 (non-protein coding) (MALAT1), long non-coding RNA [NR_002819]	378938		65273773	chr11	65273714	+	hs|11q13.1	NR_002819	chr11:65273714-65273773	NR_002819	Hs.621695
A_21_P0005169	2.1892	1.1304	2.1892	up	lnc-CRISP2-1	lnc-CRISP2-1:1	FALSE	LNCipedia lincRNA (lnc-CRISP2-1), lincRNA [lnc-CRISP2-1:1]			49646478	chr6	49646419	-	hs|6p12.3		chr6:49646478-49646419
A_33_P3590279	2.02146	1.0154	2.02146	up			FALSE	ribosomal protein L31 pseudogene 57 [Source:HGNC Symbol;Acc:HGNC:35703] [ENST00000461109]			62385763	chr17	62385704	-	hs|17q23.3		chr17:62385763-62385704
A_23_P48455	2.52043	1.33367	2.52043	up	AMN	amnion associated transmembrane protein	FALSE	Homo sapiens amnion associated transmembrane protein (AMN), mRNA [NM_030943]	81693	GO:0007588|GO:0015889|GO:0009235|GO:0005886|GO:0043001|GO:0005102|GO:0006767|GO:0030139|GO:0007275|GO:0044281|GO:0005615|GO:0006898|GO:0016324|GO:0006766|GO:0042157|GO:0016021|GO:0010008|GO:0070062	103397112	chr14	103397053	+	hs|14q32.32	NM_030943	chr14:103397053-103397112	NM_030943	Hs.534494
A_33_P3210848	4.37755	2.13012	4.37755	up	ELFN1	extracellular leucine-rich repeat and fibronectin type III domain containing 1	FALSE	Homo sapiens extracellular leucine-rich repeat and fibronectin type III domain containing 1 (ELFN1), mRNA [NM_001128636]	392617	GO:0050808|GO:0019902|GO:0010923|GO:0004864|GO:0016021|GO:0060076|GO:0030425|GO:0070062	1787459	chr7	1787400	+	hs|7p22.3	NM_001128636	chr7:1787400-1787459	NM_001128636	Hs.42896
A_33_P3418511	3.49938	1.8071	3.49938	up	HCCAT5	hepatocellular carcinoma associated transcript 5 (non-protein coding)	FALSE	Homo sapiens hepatocellular carcinoma associated transcript 5 (non-protein coding) (HCCAT5), long non-coding RNA [NR_027756]	283902		73127672	chr16	73127613	+	hs|16q22.3	NR_027756	chr16:73127613-73127672	NR_027756	Hs.382776
A_21_P0007574	5.69212	2.50896	5.69212	up	lnc-CAND1-1	lnc-CAND1-1:1	FALSE	LNCipedia lincRNA (lnc-CAND1-1), lincRNA [lnc-CAND1-1:1]			67815013	chr12	67814954	+	hs|12q15		chr12:67814954-67815013
A_19_P00318803	2.03642	1.02604	2.03642	up	SEPT7-AS1	SEPT7 antisense RNA 1 (head to head)	FALSE	Homo sapiens SEPT7 antisense RNA 1 (head to head) (SEPT7-AS1), transcript variant 2, long non-coding RNA [NR_120512]	101928545		35820878	chr7	35820819	-	hs|7p14.2	NR_120512	chr7:35820878-35820819	NR_120512
A_24_P235756	2.16562	1.11478	2.16562	up	OR51E2	olfactory receptor, family 51, subfamily E, member 2	FALSE	Homo sapiens olfactory receptor, family 51, subfamily E, member 2 (OR51E2), mRNA [NM_030774]	81285	GO:0071398|GO:0050911|GO:0004984|GO:0007186|GO:0005886|GO:0004930|GO:0043401|GO:0003707|GO:0038023|GO:0016021|GO:0045777|GO:1900135	4701498	chr11	4701439	-	hs|11p15.4	NM_030774	chr11:4701498-4701439	NM_030774	Hs.501758
A_23_P215484	2.31911	1.21357	2.31911	up	CCL26	chemokine (C-C motif) ligand 26	FALSE	Homo sapiens chemokine (C-C motif) ligand 26 (CCL26), mRNA [NM_006072]	10344	GO:0008009|GO:0007165|GO:0006955|GO:0030335|GO:0006954|GO:0030838|GO:0006935|GO:0001938|GO:0060326|GO:0007267|GO:0032855|GO:0005615	75401219	chr7	75399061	-	hs|7q11.23	NM_006072	chr7:75401219-75399061	NM_006072	Hs.131342
A_21_P0002374	3.49015	1.80329	3.49015	up	lnc-AC112715.2.1-3	lnc-AC112715.2.1-3:1	FALSE	LNCipedia lincRNA (lnc-AC112715.2.1-3), lincRNA [lnc-AC112715.2.1-3:1]			238121371	chr2	238121312	+	hs|2q37.3		chr2:238121312-238121371
A_33_P3380772	3.43077	1.77853	3.43077	up	CCM2L	cerebral cavernous malformation 2-like	FALSE	Homo sapiens cerebral cavernous malformation 2-like (CCM2L), mRNA [NM_080625]	140706	GO:0032091|GO:0008150|GO:0003674|GO:0042060|GO:0003222|GO:0034111|GO:0005575|GO:0090271|GO:0055017|GO:0003209	30607204	chr20	30607145	+	hs|20q11.21	NM_080625	chr20:30607145-30607204	NM_080625	Hs.382151
A_21_P0008288	6.22869	2.63893	6.22869	up			FALSE				100092074	chr14	100092015	+	hs|14q32.2		chr14:100092015-100092074		Hs.131714
A_33_P3279640	3.50092	1.80774	3.50092	up	HCN2	hyperpolarization activated cyclic nucleotide gated potassium channel 2	FALSE	Homo sapiens hyperpolarization activated cyclic nucleotide gated potassium channel 2 (HCN2), mRNA [NM_001194]	610	GO:0005886|GO:0005222|GO:0005248|GO:0007267|GO:0007268|GO:0042802|GO:0030552|GO:0005887|GO:0005249|GO:0008076|GO:0042391|GO:0034765|GO:0035725|GO:0071320|GO:0071805|GO:0071321	617157	chr19	617098	+	hs|19p13.3	NM_001194	chr19:617098-617157	NM_001194	Hs.124161
A_21_P0000700	2.05865	1.0417	2.05865	up	LOC100507053	uncharacterized LOC100507053	FALSE	Homo sapiens uncharacterized LOC100507053 (LOC100507053), long non-coding RNA [NR_037884]	100507053		100222423	chr4	100222364	+	hs|4q23	NR_037884	chr4:100222364-100222423	NR_037884	Hs.635084
A_33_P3394769	3.42682	1.77687	3.42682	up	TMEM8C	transmembrane protein 8C	FALSE	Homo sapiens transmembrane protein 8C (TMEM8C), mRNA [NM_001080483]	389827	GO:0007517|GO:0005886|GO:0045026|GO:0007520|GO:0016021	136379767	chr9	136379708	-	hs|9q34.2	NM_001080483	chr9:136379767-136379708	NM_001080483	Hs.512467
A_21_P0004813	2.25203	1.17123	2.25203	up	lnc-IRF4-2	lnc-IRF4-2:1	FALSE	LNCipedia lincRNA (lnc-IRF4-2), lincRNA [lnc-IRF4-2:1]			694048	chr6	693989	+	hs|6p25.3		chr6:693989-694048
A_32_P99753	2.10182	1.07164	2.10182	up	EFCAB12	EF-hand calcium binding domain 12	FALSE	Homo sapiens EF-hand calcium binding domain 12 (EFCAB12), mRNA [NM_207307]	90288	GO:0005509	129120522	chr3	129120463	-	hs|3q21.3	NM_207307	chr3:129120522-129120463	NM_207307	Hs.652347
A_33_P3343727	3.77537	1.91662	3.77537	up	CELA3A	chymotrypsin-like elastase family, member 3A	FALSE	chymotrypsin-like elastase family, member 3A [Source:HGNC Symbol;Acc:HGNC:15944] [ENST00000374663]	10136	GO:0004252|GO:0007586|GO:0006508|GO:0008203	22332536	chr1	22332477	+	hs|1p36.12	AK308514	chr1:22332477-22332536		Hs.181289
A_33_P3301940	2.28873	1.19455	2.28873	up	PDE7B	phosphodiesterase 7B	FALSE	Homo sapiens phosphodiesterase 7B (PDE7B), mRNA [NM_018945]	27115	GO:0007165|GO:0004115|GO:0007268|GO:0046872|GO:0006198|GO:0005829	136516694	chr6	136516635	+	hs|6q23.3	NM_018945	chr6:136516635-136516694	NM_018945	Hs.744230
A_33_P3287314	2.27786	1.18768	2.27786	up			FALSE				14522801	chr7	14522742	+	hs|7p21.2		chr7:014522742-014522801
A_21_P0007452	2.57748	1.36596	2.57748	up	lnc-AP000679.2.1-1	lnc-AP000679.2.1-1:1	FALSE	LNCipedia lincRNA (lnc-AP000679.2.1-1), lincRNA [lnc-AP000679.2.1-1:1]			119898577	chr11	119897902	+	hs|11q23.3		chr11:119897902-119898577
A_33_P3222852	3.26644	1.70772	3.26644	up			FALSE	Homo sapiens LP3317 mRNA, complete cds. [AY203941]			35602988	chr19	35602929	+	hs|19q13.12	AY203941	chr19:35602929-35602988		Hs.404342
A_33_P3420914	2.37205	1.24614	2.37205	up			FALSE	chondroitin sulfate proteoglycan 4 pseudogene 8 [Source:HGNC Symbol;Acc:HGNC:48359] [ENST00000456932]			85736602	chr15	85736543	+	hs|15q25.3	XR_433169	chr15:85736543-85736602	XR_433169	Hs.513096
A_33_P3373775	3.04347	1.60572	3.04347	up	BCL2L15	BCL2-like 15	FALSE	Homo sapiens BCL2-like 15 (BCL2L15), mRNA [NM_001010922]	440603	GO:0006915|GO:0005634|GO:0005829	114419524	chr1	114419465	-	hs|1p13.2	NM_001010922	chr1:114419524-114419465	NM_001010922	Hs.123106
A_23_P46238	7.50241	2.90735	7.50241	up	CELA2A	chymotrypsin-like elastase family, member 2A	FALSE	Homo sapiens chymotrypsin-like elastase family, member 2A (CELA2A), mRNA [NM_033440]	63036	GO:0004252|GO:0006508|GO:0005576|GO:0017171	15798491	chr1	15793981	+	hs|1p36.21	NM_033440	chr1:15793981-15798491	NM_033440	Hs.631866
A_19_P00316256	2.17137	1.1186	2.17137	up	LOC101927668	uncharacterized LOC101927668	FALSE	Homo sapiens uncharacterized LOC101927668 (LOC101927668), long non-coding RNA [NR_110114]	101927668		19958774	chr7	19958715	-	hs|7p21.1		chr7:19958774-19958715	NR_110114
A_21_P0003528	3.0142	1.59178	3.0142	up	lnc-MAP9-2	lnc-MAP9-2:2	FALSE	Q73RJ0_TREDE (Q73RJ0) Conserved domain protein, partial (5%) [THC2695224]			156127766	chr4	156127707	-	hs|4q32.1		chr4:156127766-156127707
A_21_P0002566	2.0175	1.01257	2.0175	up	lnc-SOX11-3	lnc-SOX11-3:12	FALSE	LNCipedia lincRNA (lnc-SOX11-3), lincRNA [lnc-SOX11-3:12]			6142064	chr2	6142005	+	hs|2p25.2		chr2:6142005-6142064
A_21_P0010155	2.75124	1.46008	2.75124	up	LOC284825	uncharacterized LOC284825	FALSE	Homo sapiens uncharacterized LOC284825 (LOC284825), transcript variant 2, long non-coding RNA [NR_126011]	284825		29475109	chr21	29475050	+	hs|21q21.3	NR_126011	chr21:29475050-29475109	NR_126011	Hs.651529
A_33_P3416966	2.7361	1.45212	2.7361	up	FAXC	failed axon connections homolog (Drosophila)	FALSE	Homo sapiens failed axon connections homolog (Drosophila) (FAXC), mRNA [NM_032511]	84553	GO:0016021	99727411	chr6	99727352	-	hs|6q16.2	NM_032511	chr6:99727411-99727352	NM_032511	Hs.573245
A_23_P94103	4.30555	2.1062	4.30555	up	SCARA5	scavenger receptor class A, member 5	FALSE	Homo sapiens scavenger receptor class A, member 5 (SCARA5), mRNA [NM_173833]	286133	GO:0034605|GO:0010468|GO:0006879|GO:0070207|GO:0030193|GO:0009986|GO:0005887|GO:0006898|GO:0070287|GO:0034755|GO:0006897|GO:0005044	27727934	chr8	27727875	-	hs|8p21.1	NM_173833	chr8:27727934-27727875	NM_173833	Hs.591833
A_32_P41553	2.05482	1.03901	2.05482	up	TSACC	TSSK6 activating co-chaperone	FALSE	Homo sapiens TSSK6 activating co-chaperone (TSACC), mRNA [NM_144627]	128229	GO:0005737|GO:0051087	156316770	chr1	156316711	+	hs|1q22	NM_144627	chr1:156316711-156316770	NM_144627	Hs.534539
A_21_P0010672	2.32164	1.21514	2.32164	up	XLOC_l2_001310		FALSE	BROAD Institute lincRNA (XLOC_l2_001310), lincRNA [TCONS_l2_00001781]			219323300	chr1	219268633	-	hs|1q41		chr1:219323300-219268633
A_21_P0012750	2.44346	1.28892	2.44346	up	GUSBP5	glucuronidase, beta pseudogene 5	FALSE	Homo sapiens glucuronidase, beta pseudogene 5 (GUSBP5), non-coding RNA [NR_003675]	441046		144481301	chr4	144481242	+	hs|4q31.21	NR_003675	chr4:144481242-144481301	NR_003675	Hs.135705
A_33_P3291454	2.06048	1.04298	2.06048	up	CCDC172	coiled-coil domain containing 172	FALSE	Homo sapiens coiled-coil domain containing 172 (CCDC172), mRNA [NM_198515]	374355		118139415	chr10	118139356	+	hs|10q25.3	NM_198515	chr10:118139356-118139415	NM_198515	Hs.233407
A_23_P108082	2.98946	1.57989	2.98946	up	CREB3L3	cAMP responsive element binding protein 3-like 3	FALSE	Homo sapiens cAMP responsive element binding protein 3-like 3 (CREB3L3), transcript variant 1, mRNA [NM_032607]	84699	GO:0005515|GO:0000977|GO:0035497|GO:0005783|GO:0045944|GO:0005789|GO:0005634|GO:0016021|GO:0001228|GO:0006351|GO:0030968	4172278	chr19	4172219	+	hs|19p13.3	NM_032607	chr19:4172219-4172278	NM_032607	Hs.247744
A_21_P0004722	2.33242	1.22182	2.33242	up			FALSE	PREDICTED: Homo sapiens LYR motif containing 4 (LYRM4), transcript variant X4, mRNA [XM_006715151]			5032052	chr6	5031993	-	hs|6p25.1	XM_006715151	chr6:5032052-5031993	XM_006715151	Hs.650699
A_21_P0010012	2.50264	1.32345	2.50264	up	lnc-FOXA2-6	lnc-FOXA2-6:1	FALSE	LNCipedia lincRNA (lnc-FOXA2-6), lincRNA [lnc-FOXA2-6:1]			22434006	chr20	22433947	-	hs|20p11.21		chr20:22434006-22433947
A_33_P3333272	4.54823	2.18531	4.54823	up	TMEM235	transmembrane protein 235	FALSE	Homo sapiens transmembrane protein 235 (TMEM235), transcript variant 1, mRNA [NM_001204210]	283999	GO:0016324|GO:0005783|GO:0005198|GO:0016021|GO:0005923	76237067	chr17	76237008	+	hs|17q25.3	NM_001204210	chr17:76237008-76237067	NM_001204210	Hs.632228
A_21_P0005344	3.27997	1.71368	3.27997	up	lnc-FAM20C-4	lnc-FAM20C-4:3	FALSE	LNCipedia lincRNA (lnc-FAM20C-4), lincRNA [lnc-FAM20C-4:3]			391129	chr7	391070	+	hs|7p22.3		chr7:391070-391129
A_21_P0002595	2.07717	1.05462	2.07717	up	STON1-GTF2A1L	STON1-GTF2A1L readthrough	FALSE	Homo sapiens STON1-GTF2A1L readthrough (STON1-GTF2A1L), transcript variant 2, mRNA [NM_001198593]	286749		49003621	chr2	49003562	+	hs|2p16.3	NM_001198593	chr2:49003562-49003621	NM_001198593	Hs.732016
A_33_P3239787	3.45075	1.78691	3.45075	up	ZNF646	zinc finger protein 646	FALSE	Homo sapiens zinc finger protein 646 (ZNF646), mRNA [NM_014699]	9726	GO:0005515|GO:0006355|GO:0005634|GO:0003677|GO:0046872|GO:0006351	31089573	chr16	31089514	+	hs|16p11.2	NM_014699	chr16:31089514-31089573	NM_014699	Hs.119273
A_23_P134433	4.37223	2.12837	4.37223	up	EN2	engrailed homeobox 2	FALSE	Homo sapiens engrailed homeobox 2 (EN2), mRNA [NM_001427]	2020	GO:0043565|GO:0016020|GO:0048666|GO:0045944|GO:0030901|GO:0007275|GO:0005634|GO:0030902	155257496	chr7	155257437	+	hs|7q36.3	NM_001427	chr7:155257437-155257496	NM_001427	Hs.134989
A_21_P0014421	4.21798	2.07655	4.21798	up			FALSE	phosphatidylinositol 4-kinase, catalytic, alpha pseudogene 2 [Source:HGNC Symbol;Acc:HGNC:33577] [ENST00000480319]			21844414	chr22	21844355	-	hs|22q11.21		chr22:21844414-21844355
A_33_P3413795	2.31644	1.21191	2.31644	up			FALSE				149400153	chr1	149400094	+	hs|1q21.2	AV727532	chr1:149400094-149400153		Hs.576457
A_21_P0000607	2.38788	1.25573	2.38788	up	ST3GAL4-AS1	ST3GAL4 antisense RNA 1 (head to head)	FALSE	Homo sapiens ST3GAL4 antisense RNA 1 (head to head) (ST3GAL4-AS1), long non-coding RNA [NR_033839]	399972		126211673	chr11	126211614	-	hs|11q24.2	NR_033839	chr11:126211673-126211614	NR_033839	Hs.585206
A_21_P0008829	4.06203	2.0222	4.06203	up	lnc-ZNF609-3	lnc-ZNF609-3:2	FALSE	LNCipedia lincRNA (lnc-ZNF609-3), lincRNA [lnc-ZNF609-3:2]			65010427	chr15	65010368	+	hs|15q22.31		chr15:65010368-65010427		Hs.559844
A_33_P3313411	4.44703	2.15284	4.44703	up	ARHGAP33	Rho GTPase activating protein 33	FALSE	Homo sapiens Rho GTPase activating protein 33 (ARHGAP33), transcript variant 2, mRNA [NM_001172630]	115703	GO:0005515|GO:0051056|GO:0005886|GO:0007264|GO:0035091|GO:0015031|GO:0032855|GO:0030675|GO:0005829	36278984	chr19	36278925	+	hs|19q13.12	NM_001172630	chr19:36278925-36278984	NM_001172630	Hs.515364
A_23_P91850	2.04114	1.02937	2.04114	up	IL20RB	interleukin 20 receptor beta	FALSE	Homo sapiens interleukin 20 receptor beta (IL20RB), mRNA [NM_144717]	53833	GO:0002437|GO:0032703|GO:0032753|GO:0004896|GO:0005886|GO:0032733|GO:0019221|GO:0001808|GO:0042130|GO:0048873|GO:0042015|GO:0002765|GO:0016021|GO:0032689	136729857	chr3	136729798	+	hs|3q22.3	NM_144717	chr3:136729798-136729857	NM_144717	Hs.61232
A_24_P91852	2.32119	1.21486	2.32119	up	DYNLT3	dynein, light chain, Tctex-type 3	FALSE	Homo sapiens dynein, light chain, Tctex-type 3 (DYNLT3), mRNA [NM_006520]	6990	GO:0007346|GO:0007067|GO:0003774|GO:0008152|GO:0005874|GO:0006810|GO:0000777|GO:0000776|GO:0005634|GO:0005868|GO:0051301|GO:0042802	37698509	chrX	37698450	-	hs|Xp11.4	NM_006520	chrX:37698509-37698450	NM_006520	Hs.446392
A_23_P126605	2.32148	1.21504	2.32148	up	TMOD4	tropomodulin 4 (muscle)	FALSE	Homo sapiens tropomodulin 4 (muscle) (TMOD4), mRNA [NM_013353]	29765	GO:0051015|GO:0006936|GO:0030239|GO:0005865|GO:0007015|GO:0005523|GO:0051694	151143021	chr1	151142547	-	hs|1q21.3	NM_013353	chr1:151143021-151142547	NM_013353	Hs.709681
A_21_P0006818	2.19401	1.13357	2.19401	up	lnc-AKR1E2-5	lnc-AKR1E2-5:7	FALSE	LNCipedia lincRNA (lnc-AKR1E2-5), lincRNA [lnc-AKR1E2-5:7]			4132012	chr10	4094320	+	hs|10p15.1		chr10:4094320-4132012
A_23_P417974	2.16327	1.11322	2.16327	up	AQP11	aquaporin 11	FALSE	Homo sapiens aquaporin 11 (AQP11), mRNA [NM_173039]	282679	GO:0005215|GO:0005886|GO:0009986|GO:0072014|GO:0005783|GO:0055085|GO:0015840|GO:0030425|GO:0005829|GO:0003674|GO:0048388|GO:0015793|GO:0051260|GO:0006833|GO:0016021|GO:0006811	77320501	chr11	77320442	+	hs|11q14.1	NM_173039	chr11:77320442-77320501	NM_173039	Hs.503345
A_33_P3324004	2.2156	1.14769	2.2156	up	CCL15	chemokine (C-C motif) ligand 15	FALSE	Homo sapiens chemokine (C-C motif) ligand 15 (CCL15), mRNA [NM_032965]	6359	GO:0008009|GO:0007165|GO:0006955|GO:0006935|GO:0060326|GO:0007267|GO:0006874|GO:0005102|GO:0042056|GO:0008201|GO:0005615|GO:0050918	34324822	chr17	34324763	-	hs|17q12	NM_032965	chr17:34324822-34324763	NM_032965	Hs.272493
A_21_P0011390	2.10886	1.07647	2.10886	up	PRKXP1	protein kinase, X-linked, pseudogene 1	FALSE	Homo sapiens protein kinase, X-linked, pseudogene 1 (PRKXP1), non-coding RNA [NR_073405]	441733		101098771	chr15	101098712	-	hs|15q26.3		chr15:101098771-101098712	NR_073405	Hs.12250
A_21_P0002702	2.286	1.19282	2.286	up	PRKAR2A-AS1	PRKAR2A antisense RNA 1	FALSE	Homo sapiens PRKAR2A antisense RNA 1 (PRKAR2A-AS1), transcript variant 1, long non-coding RNA [NR_109996]	100506637		48889414	chr3	48889355	+	hs|3p21.31	NR_109996	chr3:48889355-48889414	NR_109996	Hs.634259
A_33_P3347035	2.38414	1.25347	2.38414	up			FALSE	Homo sapiens cDNA clone IMAGE:7262526, with apparent retained intron. [BC069659]			99653180	chr3	99653121	+	hs|3q12.1	BC069659	chr3:99653121-99653180		Hs.655345
A_33_P3365995	2.18415	1.12707	2.18415	up	MAST4	microtubule associated serine/threonine kinase family member 4	FALSE	Homo sapiens microtubule associated serine/threonine kinase family member 4 (MAST4), transcript variant 4, mRNA [NM_001290226]	375449	GO:0005737|GO:0000287|GO:0004674|GO:0006468|GO:0005524	66255072	chr5	66255013	+	hs|5q12.3	NM_001290226	chr5:66255013-66255072	NM_001290226	Hs.595458
A_33_P3814721	2.91425	1.54313	2.91425	up	INSC	inscuteable homolog (Drosophila)	FALSE	Homo sapiens inscuteable homolog (Drosophila) (INSC), transcript variant 1, mRNA [NM_001031853]	387755	GO:0005737|GO:0060487|GO:0000132|GO:0045177|GO:0007399	15267622	chr11	15267563	+	hs|11p15.2	NM_001031853	chr11:15267563-15267622	NM_001031853	Hs.591997
A_21_P0014880	3.11949	1.64131	3.11949	up			FALSE				102121843	chr10	102121784	-	hs|10q24.31		chr10:102121843-102121784
A_21_P0009796	2.56246	1.35753	2.56246	up	lnc-ZNF71-3	lnc-ZNF71-3:1	FALSE	LNCipedia lincRNA (lnc-ZNF71-3), lincRNA [lnc-ZNF71-3:1]			57359360	chr19	57352789	+	hs|19q13.43		chr19:57352789-57359360
A_33_P3221373	2.79018	1.48036	2.79018	up	LOC102724804	uncharacterized LOC102724804	FALSE	Homo sapiens uncharacterized LOC102724804 (LOC102724804), transcript variant 1, long non-coding RNA [NR_125828]	102724804		97384252	chr8	97384193	-	hs|8q22.1	NR_125828	chr8:97384252-97384193	NR_125828	Hs.571415
A_33_P3262973	2.295	1.1985	2.295	up			FALSE				3135828	chr2	3135769	-	hs|2p25.3		chr2:3135828-3135769		Hs.447991
A_33_P3386506	3.4099	1.76973	3.4099	up	NFKBIL1	nuclear factor of kappa light polypeptide gene enhancer in B-cells inhibitor-like 1	FALSE	Homo sapiens nuclear factor of kappa light polypeptide gene enhancer in B-cells inhibitor-like 1 (NFKBIL1), transcript variant 2, mRNA [NM_001144961]	4795	GO:0005515|GO:0071222|GO:0034122|GO:0007249|GO:0032720|GO:0042994|GO:0032088|GO:0005654|GO:0005634|GO:0045111|GO:0031665|GO:0005829	31516011	chr6	31515952	+	hs|6p21.33	NM_001144961	chr6:31515952-31516011	NM_001144961	Hs.2764
A_23_P389692	2.01142	1.00821	2.01142	up	KIAA1328	KIAA1328	FALSE	Homo sapiens KIAA1328 (KIAA1328), mRNA [NM_020776]	57536		34804949	chr18	34804890	+	hs|18q12.2	NM_020776	chr18:34804890-34804949	NM_020776	Hs.4045
A_33_P3793702	2.29966	1.20142	2.29966	up	LINC00964	long intergenic non-protein coding RNA 964	FALSE	Homo sapiens long intergenic non-protein coding RNA 964 (LINC00964), long non-coding RNA [NR_027321]	157381		125963293	chr8	125963234	+	hs|8q24.13	NR_027321	chr8:125963234-125963293	NR_027321	Hs.651593
A_24_P271149	2.21439	1.14691	2.21439	up	IGLON5	IgLON family member 5	FALSE	Homo sapiens IgLON family member 5 (IGLON5), mRNA [NM_001101372]	402665	GO:0043005|GO:0016337|GO:0050767|GO:0009986|GO:0005886|GO:0005911|GO:0043025|GO:0005576	51833286	chr19	51833227	+	hs|19q13.41	NM_001101372	chr19:51833227-51833286	NM_001101372	Hs.546636
A_21_P0007066	2.46055	1.29898	2.46055	up	lnc-SRGN-1	lnc-SRGN-1:1	FALSE	LNCipedia lincRNA (lnc-SRGN-1), lincRNA [lnc-SRGN-1:1]			70829994	chr10	70829935	+	hs|10q22.1		chr10:70829935-70829994
A_19_P00808307	3.46204	1.79162	3.46204	up	FAM107A	family with sequence similarity 107, member A	FALSE	Homo sapiens family with sequence similarity 107, member A (FAM107A), transcript variant 4, mRNA [NM_001282714]	11170	GO:0043005|GO:0003674|GO:0005634|GO:0001558	58613264	chr3	58613205	-	hs|3p14.2	NM_001282714	chr3:58613264-58613205	NM_001282714	Hs.506357
A_23_P256663	3.6934	1.88495	3.6934	up	GALR3	galanin receptor 3	FALSE	Homo sapiens galanin receptor 3 (GALR3), mRNA [NM_003614]	8484	GO:0007631|GO:0005886|GO:0007218|GO:0045944|GO:0007611|GO:0007268|GO:0004966|GO:0016021|GO:0017046|GO:0007194|GO:0007193	38221385	chr22	38221326	+	hs|22q13.1	NM_003614	chr22:38221326-38221385	NM_003614	Hs.158353
A_21_P0005417	3.24724	1.69922	3.24724	up	LOC100996249	uncharacterized LOC100996249	FALSE	Homo sapiens uncharacterized LOC100996249 (LOC100996249), transcript variant 1, long non-coding RNA [NR_110159]	100996249		112260661	chr7	112260602	+	hs|7q31.1	NR_110159	chr7:112260602-112260661	NR_110159
A_33_P3388588	3.57654	1.83856	3.57654	up	LOC400558	uncharacterized LOC400558	FALSE	Homo sapiens uncharacterized LOC400558 (LOC400558), long non-coding RNA [NR_046200]	400558		89235411	chr16	89235352	+	hs|16q24.3	NR_046200	chr16:89235352-89235411	NR_046200	Hs.513818
A_33_P3357470	2.95614	1.56371	2.95614	up	REPS2	RALBP1 associated Eps domain containing 2	FALSE	Homo sapiens RALBP1 associated Eps domain containing 2 (REPS2), transcript variant 1, mRNA [NM_004726]	9185	GO:0005515|GO:0005737|GO:0006461|GO:0007173|GO:0005509	17152029	chrX	17151970	+	hs|Xp22.13	NM_004726	chrX:17151970-17152029	NM_004726	Hs.186810
A_33_P3256810	2.51313	1.32948	2.51313	up	TM4SF4	transmembrane 4 L six family member 4	FALSE	Homo sapiens transmembrane 4 L six family member 4 (TM4SF4), mRNA [NM_004617]	7104	GO:0016021|GO:0042246	149216647	chr3	149216588	+	hs|3q25.1	NM_004617	chr3:149216588-149216647	NM_004617	Hs.133527
A_33_P3255964	2.66726	1.41536	2.66726	up	CYMP	chymosin pseudogene	FALSE	Homo sapiens chymosin pseudogene (CYMP), non-coding RNA [NR_003599]	643160		111033877	chr1	111033818	+	hs|1p13.3		chr1:111033818-111033877	NR_003599	Hs.532720
A_33_P3270360	2.75179	1.46037	2.75179	up	OR1S1	olfactory receptor, family 1, subfamily S, member 1 (gene/pseudogene)	FALSE	Homo sapiens olfactory receptor, family 1, subfamily S, member 1 (gene/pseudogene) (OR1S1), mRNA [NM_001004458]	219959	GO:0050911|GO:0050907|GO:0004984|GO:0007186|GO:0005886|GO:0004930|GO:0016021|GO:0004888	57983052	chr11	57982993	+	hs|11q12.1	NM_001004458	chr11:57982993-57983052	NM_001004458	Hs.553645
A_23_P352535	2.09433	1.06649	2.09433	up	PPP1R16B	protein phosphatase 1, regulatory subunit 16B	FALSE	Homo sapiens protein phosphatase 1, regulatory subunit 16B (PPP1R16B), transcript variant 1, mRNA [NM_015568]	26051	GO:0005515|GO:0005886|GO:0019903|GO:0035307|GO:0035308|GO:0005634|GO:0042995|GO:0014066|GO:0008599|GO:0007165|GO:0051489|GO:0050790|GO:0001938|GO:0061028	37551521	chr20	37551462	+	hs|20q11.23	NM_015568	chr20:37551462-37551521	NM_015568	Hs.45719
A_21_P0001237	2.59337	1.37483	2.59337	up			FALSE				230960412	chr1	230959597	-	hs|1q42.2		chr1:230960412-230959597
A_23_P335495	2.80162	1.48626	2.80162	up	ANO7	anoctamin 7	FALSE	Homo sapiens anoctamin 7 (ANO7), transcript variant NGEP-L, mRNA [NM_001001891]	50636	GO:0006821|GO:0030054|GO:0005886|GO:0005783|GO:0017128|GO:0005634|GO:0055085|GO:0005829|GO:0005622|GO:0034220|GO:0006869|GO:0005229|GO:0016021	242164427	chr2	242164368	+	hs|2q37.3	NM_001001891	chr2:242164368-242164427	NM_001001891	Hs.163909
A_19_P00320351	2.15721	1.10916	2.15721	up	LOC642852	uncharacterized LOC642852	FALSE	Homo sapiens uncharacterized LOC642852 (LOC642852), long non-coding RNA [NR_026943]	642852		46713281	chr21	46713222	+	hs|21q22.3	NR_026943	chr21:46713222-46713281	NR_026943	Hs.11637
A_33_P3253239	2.58153	1.36823	2.58153	up			FALSE				180922843	chr1	180922784	+	hs|1q25.3		chr1:180922784-180922843
A_33_P3343845	2.1261	1.08821	2.1261	up	CBX7	chromobox homolog 7	FALSE	Homo sapiens chromobox homolog 7 (CBX7), mRNA [NM_175709]	23492	GO:0035102|GO:0000792|GO:0005515|GO:0031519|GO:0000790|GO:0003727|GO:0005634|GO:0000122|GO:0035064|GO:0006351|GO:0005737|GO:0003682|GO:0048733|GO:0005654|GO:0016568	39529778	chr22	39529719	-	hs|22q13.1	NM_175709	chr22:39529778-39529719	NM_175709	Hs.356416
A_33_P3388527	2.47413	1.30692	2.47413	up			FALSE				79367597	chr17	79367538	+	hs|17q25.3		chr17:079367538-079367597
A_24_P191790	2.85265	1.5123	2.85265	up	TMEM33	transmembrane protein 33	FALSE	Homo sapiens transmembrane protein 33 (TMEM33), mRNA [NM_018126]	55161	GO:0042470|GO:0008150|GO:0016021|GO:0070062	41957268	chr4	41957209	+	hs|4p13	NM_018126	chr4:41957209-41957268	NM_018126	Hs.31082
A_33_P3263284	10.4267	3.38222	10.4267	up	LOC100130238	uncharacterized LOC100130238	FALSE	Homo sapiens uncharacterized LOC100130238 (LOC100130238), long non-coding RNA [NR_024563]	100130238		132857485	chr12	132857426	+	hs|12q24.33	NR_024563	chr12:132857426-132857485	NR_024563	Hs.536338
A_33_P3275878	4.62632	2.20987	4.62632	up	SFTPB	surfactant protein B	FALSE	Homo sapiens surfactant protein B (SFTPB), transcript variant 1, mRNA [NM_000542]	6439	GO:0006665|GO:0007585|GO:0009887|GO:0005764|GO:0005615	85886044	chr2	85885985	-	hs|2p11.2	NM_000542	chr2:85886044-85885985	NM_000542	Hs.512690
A_21_P0010135	3.64407	1.86555	3.64407	up			FALSE				47459020	chr21	47458961	+	hs|21q22.3		chr21:47458961-47459020
A_32_P186981	2.12447	1.0871	2.12447	up	RPL17	ribosomal protein L17	FALSE	Homo sapiens ribosomal protein L17 (RPL17), transcript variant 1, mRNA [NM_000985]	6139	GO:0010467|GO:0003735|GO:0006614|GO:0019083|GO:0019058|GO:0005634|GO:0006415|GO:0006412|GO:0006413|GO:0005829|GO:0006414|GO:0000184|GO:0016032|GO:0022625|GO:0044267	47015801	chr18	47015742	-	hs|18q21.1	NM_000985	chr18:47015801-47015742	NM_000985	Hs.374588
A_33_P3415097	2.17062	1.11811	2.17062	up	CLCN4	chloride channel, voltage-sensitive 4	FALSE	Homo sapiens chloride channel, voltage-sensitive 4 (CLCN4), transcript variant 1, mRNA [NM_001830]	1183	GO:0006821|GO:0005247|GO:0005254|GO:0005524|GO:0055085|GO:0044070|GO:0015297|GO:0034220|GO:0031901|GO:0031902|GO:0006810|GO:0016021|GO:0010008	10205594	chrX	10205535	+	hs|Xp22.2	NM_001830	chrX:10205535-10205594	NM_001830	Hs.495674
A_21_P0000277	2.092	1.06488	2.092	up	SNORD37	small nucleolar RNA, C/D box 37	FALSE	Homo sapiens small nucleolar RNA, C/D box 37 (SNORD37), small nucleolar RNA [NR_002602]	26812		3982564	chr19	3982505	-	hs|19p13.3	NR_002602	chr19:3982564-3982505	NR_002602
A_21_P0012741	2.34574	1.23005	2.34574	up	lnc-LARP1B-2	lnc-LARP1B-2:1	FALSE	Homo sapiens cDNA FLJ41533 fis, clone BRTHA2016179. [AK123527]			129435779	chr4	129435720	+	hs|4q28.2		chr4:129435720-129435779		Hs.635499
A_33_P3346966	3.09996	1.63225	3.09996	up	SPAG16	sperm associated antigen 16	FALSE	Homo sapiens sperm associated antigen 16 (SPAG16), transcript variant 1, mRNA [NM_024532]	79582	GO:0042384|GO:0019901|GO:0031514|GO:0005930|GO:0015630|GO:0005634|GO:0007283	215013989	chr2	215013930	+	hs|2q34	NM_024532	chr2:215013930-215013989	NM_024532	Hs.743365
A_21_P0008611	2.46326	1.30057	2.46326	up	lnc-C15orf41-1	lnc-C15orf41-1:1	FALSE	LNCipedia lincRNA (lnc-C15orf41-1), lincRNA [lnc-C15orf41-1:1]			36799342	chr15	36793853	+	hs|15q14		chr15:36793853-36799342
A_21_P0011755	2.22395	1.15313	2.22395	up			FALSE				45742313	chr19	45742254	-	hs|19q13.32		chr19:45742313-45742254
A_33_P3341494	2.24001	1.16351	2.24001	up	ZNF658	zinc finger protein 658	FALSE	Homo sapiens zinc finger protein 658 (ZNF658), mRNA [NM_033160]	26149	GO:0006355|GO:0003700|GO:0005634|GO:0003677|GO:0046872|GO:0006351	40772281	chr9	40772222	-	hs|9p13.1	NM_033160	chr9:40772281-40772222	NM_033160	Hs.522147
A_32_P209094	2.00562	1.00405	2.00562	up	FGGY	FGGY carbohydrate kinase domain containing	FALSE	Homo sapiens FGGY carbohydrate kinase domain containing (FGGY), transcript variant 2, mRNA [NM_018291]	55277	GO:0016310|GO:0003674|GO:0016301|GO:0005975|GO:0016773|GO:0005575|GO:0070050	60228265	chr1	60228206	+	hs|1p32.1	NM_018291	chr1:60228206-60228265	NM_018291	Hs.444301
A_21_P0010307	2.08868	1.06259	2.08868	up	LOC284825	uncharacterized LOC284825	FALSE	Homo sapiens uncharacterized LOC284825 (LOC284825), transcript variant 1, long non-coding RNA [NR_126010]	284825		29502852	chr21	29475033	+	hs|21q21.3	NR_126010	chr21:29475033-29502852	NR_126010	Hs.651964
A_23_P60627	2.9266	1.54922	2.9266	up	ALOX15B	arachidonate 15-lipoxygenase, type B	FALSE	Homo sapiens arachidonate 15-lipoxygenase, type B (ALOX15B), transcript variant d, mRNA [NM_001141]	247	GO:0006629|GO:0019369|GO:0008285|GO:0005886|GO:0005634|GO:0044281|GO:0008289|GO:0005829|GO:0005622|GO:0005737|GO:0035360|GO:0045618|GO:0030856|GO:0030850|GO:0005856|GO:0045926|GO:0090197|GO:0070062|GO:0030336|GO:0005506|GO:0010744|GO:0005509|GO:0019372|GO:0006915|GO:0045786|GO:0043651|GO:0016020|GO:0016165|GO:0051122|GO:0055114|GO:0050473|GO:0019898	7952241	chr17	7952182	+	hs|17p13.1	NM_001141	chr17:7952182-7952241	NM_001141	Hs.111256
A_24_P84752	3.21574	1.68515	3.21574	up			FALSE	Homo sapiens cDNA FLJ11348 fis, clone PLACE4000638. [AK002210]			134539475	chr8	134539416	+	hs|8q24.22	AK002210	chr8:134539416-134539475
A_21_P0000674	2.94364	1.5576	2.94364	up	LOC100289473	cytoskeleton associated protein 2-like pseudogene	FALSE	Homo sapiens cytoskeleton associated protein 2-like pseudogene (LOC100289473), non-coding RNA [NR_037142]	100289473		1754071	chr20	1754012	-	hs|20p13	NR_037142	chr20:1754071-1754012	NR_037142	Hs.641525
A_33_P3393537	2.22707	1.15515	2.22707	up	PTAFR	platelet-activating factor receptor	FALSE	Homo sapiens platelet-activating factor receptor (PTAFR), transcript variant 2, mRNA [NM_001164722]	5724	GO:0005886|GO:0004930|GO:0048015|GO:0019221|GO:0001875|GO:0001816|GO:0043231|GO:0001530|GO:0006955|GO:0032959|GO:0004992|GO:0005543|GO:0006954|GO:0016020|GO:0006935|GO:0007186|GO:0045028|GO:0005887|GO:0005654|GO:0035589|GO:0016021|GO:0031663|GO:0060333	28520418	chr1	28520359	-	hs|1p35.3	NM_001164722	chr1:28520418-28520359	NM_001164722	Hs.77542
A_23_P86493	2.70333	1.43474	2.70333	up	LBX1	ladybird homeobox 1	FALSE	Homo sapiens ladybird homeobox 1 (LBX1), mRNA [NM_006562]	10660	GO:0005667|GO:0003700|GO:0008285|GO:0021522|GO:0048664|GO:0005634|GO:0009653|GO:0006351|GO:0021920|GO:0001947|GO:0043565|GO:0007517|GO:0045665	102986818	chr10	102986759	-	hs|10q24.31	NM_006562	chr10:102986818-102986759	NM_006562	Hs.37128
A_24_P255874	2.02626	1.01882	2.02626	up	HCG4B	HLA complex group 4B (non-protein coding)	FALSE	Homo sapiens HLA complex group 4B (non-protein coding) (HCG4B), long non-coding RNA [NR_001317]	80868		29894617	chr6	29894558	-	hs|6p22.1	NR_001317	chr6:29894617-29894558	NR_001317	Hs.661198
A_23_P64990	2.08655	1.06112	2.08655	up	RAD52	RAD52 homolog (S. cerevisiae)	FALSE	Homo sapiens RAD52 homolog (S. cerevisiae) (RAD52), transcript variant 1, mRNA [NM_134424]	5893	GO:0005515|GO:0006281|GO:0000724|GO:0000730|GO:0006310|GO:0005654|GO:0005634|GO:0003677|GO:0042802|GO:0006302	1022227	chr12	1022168	-	hs|12p13.33	NM_134424	chr12:1022227-1022168	NM_134424	Hs.410355
A_21_P0006516	2.11125	1.0781	2.11125	up	LINC00629	long intergenic non-protein coding RNA 629	FALSE	Homo sapiens long intergenic non-protein coding RNA 629 (LINC00629), long non-coding RNA [NR_038998]	100506757		133693847	chrX	133693788	+	hs|Xq26.3	NR_038998	chrX:133693788-133693847	NR_038998	Hs.130961
A_33_P3310226	2.31217	1.20925	2.31217	up	LOC100129115	uncharacterized LOC100129115	FALSE	Homo sapiens cDNA FLJ37894 fis, clone BRTHA2004639. [AK095213]	100129115		43205580	chr17	43205521	-	hs|17q21.31	AK095213	chr17:43205580-43205521		Hs.683858
A_33_P3232688	2.10006	1.07043	2.10006	up			FALSE	colony stimulating factor 2 receptor, alpha, low-affinity (granulocyte-macrophage) [Source:HGNC Symbol;Acc:HGNC:2435] [ENST00000381524]			1429192	chrX	1429133	+	hs|Xp22.33		chrX:1429133-1429192
A_21_P0004493	2.16365	1.11347	2.16365	up	lnc-C5orf17-5	lnc-C5orf17-5:1	FALSE	LNCipedia lincRNA (lnc-C5orf17-5), lincRNA [lnc-C5orf17-5:1]			25260733	chr5	25259091	+	hs|5p14.1		chr5:25259091-25260733
A_23_P377882	7.10094	2.82801	7.10094	up	KCNH2	potassium channel, voltage gated eag related subfamily H, member 2	FALSE	Homo sapiens potassium voltage-gated channel, subfamily H (eag-related), member 2 (KCNH2), transcript variant 2, mRNA [NM_172056]	3757	GO:0005515|GO:0005251|GO:0086010|GO:0005886|GO:0055075|GO:0060306|GO:0007268|GO:0005635|GO:0060307|GO:0086091|GO:0000155|GO:0060048|GO:0042803|GO:0042802|GO:0003064|GO:0071435|GO:0005737|GO:0000160|GO:0008076|GO:0005249|GO:0097110|GO:0042391|GO:0031625|GO:0071805|GO:0086005|GO:0023014|GO:0005242|GO:0009986|GO:0035690|GO:0086013|GO:0086011	150647043	chr7	150646984	-	hs|7q36.1	NM_172056	chr7:150647043-150646984	NM_172056	Hs.647099
A_33_P3252414	2.11746	1.08234	2.11746	up	TH	tyrosine hydroxylase	FALSE	Homo sapiens tyrosine hydroxylase (TH), transcript variant 1, mRNA [NM_199292]	7054	GO:0005515|GO:0033162|GO:0046684|GO:0009651|GO:0018963|GO:0007605|GO:0008016|GO:0009653|GO:0010043|GO:0048596|GO:0007507|GO:0034641|GO:0042745|GO:0051602|GO:0009414|GO:0032496|GO:0009887|GO:0031667|GO:0007613|GO:0009416|GO:0007612|GO:0032355|GO:0051412|GO:0033076|GO:0007617|GO:0071287|GO:0019904|GO:0035240|GO:0009635|GO:0042214|GO:0071316|GO:0005790|GO:0006585|GO:0035176|GO:0009898|GO:0019899|GO:…	2185218	chr11	2185159	-	hs|11p15.5	NM_199292	chr11:2185218-2185159	NM_199292	Hs.435609
A_21_P0014255	2.8572	1.5146	2.8572	up			FALSE				131589091	chr10	131589032	+	hs|10q26.3		chr10:131589032-131589091
A_23_P30204	2.18189	1.12558	2.18189	up	HMHB1	histocompatibility (minor) HB-1	FALSE	Homo sapiens histocompatibility (minor) HB-1 (HMHB1), mRNA [NM_021182]	57824	GO:0002376	143200268	chr5	143200209	+	hs|5q31.3	NM_021182	chr5:143200209-143200268	NM_021182	Hs.158320
A_33_P3297205	2.28988	1.19527	2.28988	up	C22orf29	chromosome 22 open reading frame 29	FALSE	Homo sapiens chromosome 22 open reading frame 29 (C22orf29), mRNA [NM_024627]	79680	GO:0005739|GO:0005515|GO:0051881	19833728	chr22	19833669	-	hs|22q11.21	NM_024627	chr22:19833728-19833669	NM_024627	Hs.105642
A_21_P0010112	5.89487	2.55946	5.89487	up	lnc-FOXA2-3	lnc-FOXA2-3:1	FALSE	LNCipedia lincRNA (lnc-FOXA2-3), lincRNA [lnc-FOXA2-3:1]			22504597	chr20	22504201	-	hs|20p11.21		chr20:22504597-22504201
A_33_P3345614	2.10643	1.0748	2.10643	up			FALSE				12811816	chr19	12811757	+	hs|19p13.2		chr19:012811757-012811816
A_33_P3493097	2.0624	1.04433	2.0624	up	LOC648149	uncharacterized LOC648149	FALSE	Homo sapiens cDNA FLJ41355 fis, clone BRAWH2016724. [AK123349]	648149		210557061	chr2	210557002	+	hs|2q34	AK123349	chr2:210557002-210557061		Hs.658840
A_33_P3389342	2.31304	1.20979	2.31304	up	ARID5A	AT rich interactive domain 5A (MRF1-like)	FALSE	Homo sapiens AT rich interactive domain 5A (MRF1-like) (ARID5A), mRNA [NM_212481]	10865	GO:0005515|GO:0005667|GO:0006357|GO:0044212|GO:0005730|GO:0005634|GO:0003677|GO:0035066|GO:0006351|GO:0002062|GO:0045944|GO:0003682|GO:0005654|GO:0045892|GO:0008134	97216420	chr2	97216361	+	hs|2q11.2	NM_212481	chr2:97216361-97216420	NM_212481	Hs.920
A_33_P3364661	2.61608	1.38741	2.61608	up	RHOA	ras homolog family member A	FALSE	ras homolog family member A [Source:HGNC Symbol;Acc:HGNC:667] [ENST00000265538]	387	GO:0044319|GO:0005515|GO:0042346|GO:0033688|GO:0043931|GO:0030036|GO:0030054|GO:0005886|GO:0007264|GO:0003924|GO:0007266|GO:0032154|GO:0036089|GO:0005829|GO:0043297|GO:0043296|GO:0007411|GO:0016032|GO:0007179|GO:0090307|GO:0043123|GO:0005856|GO:0005938|GO:0070062|GO:0030334|GO:0051056|GO:0048010|GO:0048011|GO:0048013|GO:0032467|GO:0048015|GO:0050919|GO:0030168|GO:0030496|GO:0061383|GO:0005525|GO:…	49449897	chr3	49449838	-	hs|3p21.31	DC392227	chr3:49449897-49449838		Hs.714276
A_33_P3269806	2.1276	1.08922	2.1276	up	ZNF616	zinc finger protein 616	FALSE	Homo sapiens zinc finger protein 616 (ZNF616), mRNA [NM_178523]	90317	GO:0006355|GO:0003700|GO:0005634|GO:0003677|GO:0046872|GO:0006351	52617720	chr19	52617661	-	hs|19q13.41	NM_178523	chr19:52617720-52617661	NM_178523	Hs.731969
A_33_P3399693	2.59921	1.37807	2.59921	up	LOC100127955	uncharacterized LOC100127955	FALSE	Homo sapiens cDNA FLJ45105 fis, clone BRAWH3033117. [AK127048]	100127955		1886094	chr7	1886035	+	hs|7p22.3	AK127048	chr7:1886035-1886094		Hs.683855
A_24_P588897	2.32062	1.21451	2.32062	up	SLCO3A1	solute carrier organic anion transporter family, member 3A1	FALSE	Homo sapiens solute carrier organic anion transporter family, member 3A1 (SLCO3A1), transcript variant 1, mRNA [NM_013272]	28232	GO:0005215|GO:0005886|GO:0043252|GO:0016021|GO:0055085	92709122	chr15	92709063	+	hs|15q26.1	NM_013272	chr15:92709063-92709122	NM_013272	Hs.311187
A_19_P00321658	2.09791	1.06895	2.09791	up	LINC00887	long intergenic non-protein coding RNA 887	FALSE	Homo sapiens long intergenic non-protein coding RNA 887 (LINC00887), long non-coding RNA [NR_024480]	100131551		194023621	chr3	194023562	-	hs|3q29	NR_024480	chr3:194023621-194023562	NR_024480	Hs.128066
A_21_P0011560	2.91103	1.54153	2.91103	up	XLOC_l2_005921		FALSE	BROAD Institute lincRNA (XLOC_l2_005921), lincRNA [TCONS_l2_00011008]			77801520	chr17	77801461	+	hs|17q25.3		chr17:77801461-77801520
A_23_P302550	2.50533	1.325	2.50533	up	RGS18	regulator of G-protein signaling 18	FALSE	Homo sapiens regulator of G-protein signaling 18 (RGS18), mRNA [NM_130782]	64407	GO:0043547|GO:0005737|GO:0007186|GO:0005886|GO:0038032|GO:0005096	192154660	chr1	192154601	+	hs|1q31.2	NM_130782	chr1:192154601-192154660	NM_130782	Hs.440890
A_24_P51683	2.07516	1.05322	2.07516	up	CDK5R2	cyclin-dependent kinase 5, regulatory subunit 2 (p39)	FALSE	Homo sapiens cyclin-dependent kinase 5, regulatory subunit 2 (p39) (CDK5R2), mRNA [NM_003936]	8941	GO:0005886|GO:0071902|GO:0016534|GO:0016533|GO:0021549|GO:0000079|GO:0021819|GO:0008289|GO:0021766|GO:0005737|GO:0045956|GO:0021722|GO:0001764	219826142	chr2	219826083	+	hs|2q35	NM_003936	chr2:219826083-219826142	NM_003936	Hs.158460
A_23_P71328	3.6869	1.88241	3.6869	up	MATN2	matrilin 2	FALSE	Homo sapiens matrilin 2 (MATN2), transcript variant 2, mRNA [NM_030583]	4147	GO:0031012|GO:0005515|GO:0008150|GO:0003674|GO:0031104|GO:0008347|GO:0007411|GO:0005509|GO:0005578|GO:0001764|GO:0048678|GO:0005604	99042814	chr8	99042755	+	hs|8q22.2	NM_030583	chr8:99042755-99042814	NM_030583	Hs.189445
A_21_P0001092	2.48336	1.31229	2.48336	up	lnc-TTC34-3	lnc-TTC34-3:5	FALSE	Homo sapiens mRNA; cDNA DKFZp666E184 (from clone DKFZp666E184). [AL833006]			2976345	chr1	2976286	-	hs|1p36.32		chr1:2976345-2976286		Hs.531041
A_24_P941359	2.05371	1.03823	2.05371	up	FAM65B	family with sequence similarity 65, member B	FALSE	Homo sapiens family with sequence similarity 65, member B (FAM65B), transcript variant 1, mRNA [NM_014722]	9750	GO:0005739|GO:0005515|GO:0005737|GO:0060171|GO:0007517|GO:0007605|GO:0030175|GO:0005856|GO:0030154	24804801	chr6	24804742	-	hs|6p22.3	NM_014722	chr6:24804801-24804742	NM_014722	Hs.559459
A_21_P0005057	2.83794	1.50485	2.83794	up	lnc-HDDC2-1	lnc-HDDC2-1:1	FALSE	LNCipedia lincRNA (lnc-HDDC2-1), lincRNA [lnc-HDDC2-1:1]			125634823	chr6	125634764	-	hs|6q22.31		chr6:125634823-125634764
A_32_P129669	2.03483	1.02491	2.03483	up	FRMPD3	FERM and PDZ domain containing 3	FALSE	Homo sapiens FERM and PDZ domain containing 3 (FRMPD3), mRNA [NM_032428]	84443	GO:0005856	106848097	chrX	106848038	+	hs|Xq22.3	NM_032428	chrX:106848038-106848097	NM_032428	Hs.496546
A_33_P3382399	2.1736	1.12008	2.1736	up	KRTAP3-1	keratin associated protein 3-1	FALSE	Homo sapiens keratin associated protein 3-1 (KRTAP3-1), mRNA [NM_031958]	83896	GO:0005198|GO:0045095	39165089	chr17	39165030	-	hs|17q21.2	NM_031958	chr17:39165089-39165030	NM_031958	Hs.307027
A_23_P52266	2.06889	1.04885	2.06889	up	IFIT1	interferon-induced protein with tetratricopeptide repeats 1	FALSE	Homo sapiens interferon-induced protein with tetratricopeptide repeats 1 (IFIT1), transcript variant 1, mRNA [NM_001548]	3434	GO:0005515|GO:0032091|GO:0019060|GO:0050689|GO:0003723|GO:0019221|GO:0051097|GO:0009615|GO:0005829|GO:0071360|GO:0005737|GO:0051607|GO:0060337|GO:0071357|GO:0045070|GO:0045071	91163497	chr10	91163438	+	hs|10q23.31	NM_001548	chr10:91163438-91163497	NM_001548	Hs.20315
A_21_P0012616	2.4639	1.30094	2.4639	up	XLOC_l2_010854		FALSE	BROAD Institute lincRNA (XLOC_l2_010854), lincRNA [TCONS_l2_00020780]			138983985	chr4	138972483	+	hs|4q28.3		chr4:138972483-138983985
A_21_P0008002	3.94138	1.9787	3.94138	up			FALSE	long intergenic non-protein coding RNA 393 [Source:HGNC Symbol;Acc:HGNC:42721] [ENST00000452852]			74120653	chr13	74120594	-	hs|13q22.1		chr13:74120653-74120594
A_23_P416581	2.03993	1.02852	2.03993	up	GNAZ	guanine nucleotide binding protein (G protein), alpha z polypeptide	FALSE	Homo sapiens guanine nucleotide binding protein (G protein), alpha z polypeptide (GNAZ), mRNA [NM_002073]	2781	GO:0005886|GO:0005783|GO:0005834|GO:0003924|GO:0005635|GO:0031683|GO:0005525|GO:0007193|GO:0046872|GO:0005829|GO:0035556|GO:0006184|GO:0007186|GO:0031821|GO:0007188|GO:0004871|GO:0005057|GO:0070062	23467196	chr22	23467137	+	hs|22q11.22	NM_002073	chr22:23467137-23467196	NM_002073	Hs.584760
A_32_P93328	2.09327	1.06576	2.09327	up	NDUFB2-AS1	NDUFB2 antisense RNA 1	FALSE	Homo sapiens NDUFB2 antisense RNA 1 (NDUFB2-AS1), long non-coding RNA [NR_024454]	100134713		140396338	chr7	140396279	-	hs|7q34	NR_024454	chr7:140396338-140396279	NR_024454	Hs.534141
A_33_P3420704	2.17069	1.11816	2.17069	up			FALSE	Q9UMX8_HUMAN (Q9UMX8) Melanoma antigen, complete [THC2480918]			143187412	chr1	143187353	+	hs|1q21.1		chr1:143187353-143187412
A_23_P45324	2.07827	1.05538	2.07827	up	TMEM35	transmembrane protein 35	FALSE	Homo sapiens transmembrane protein 35 (TMEM35), mRNA [NM_021637]	59353	GO:0008150|GO:0003674|GO:0016023|GO:0016021|GO:0005575|GO:0005778	100351289	chrX	100351230	+	hs|Xq22.1	NM_021637	chrX:100351230-100351289	NM_021637	Hs.45140
A_33_P3313145	2.08973	1.06332	2.08973	up	ITIH3	inter-alpha-trypsin inhibitor heavy chain 3	FALSE	Homo sapiens inter-alpha-trypsin inhibitor heavy chain 3 (ITIH3), mRNA [NM_002217]	3699	GO:0010951|GO:0004866|GO:0004867|GO:0030212|GO:0005576|GO:0070062	52842697	chr3	52842638	+	hs|3p21.1	NM_002217	chr3:52842638-52842697	NM_002217	Hs.76716
A_33_P3290235	2.07323	1.05188	2.07323	up	LOC149950	uncharacterized LOC149950	FALSE	Homo sapiens uncharacterized LOC149950 (LOC149950), long non-coding RNA [NR_034152]	149950		31196506	chr20	31196447	+	hs|20q11.21	NR_034152	chr20:31196447-31196506	NR_034152	Hs.516980
A_33_P3398912	2.0548	1.039	2.0548	up	SLC2A6	solute carrier family 2 (facilitated glucose transporter), member 6	FALSE	Homo sapiens solute carrier family 2 (facilitated glucose transporter), member 6 (SLC2A6), transcript variant 1, mRNA [NM_017585]	11182	GO:0016020|GO:0015758|GO:0005886|GO:0016021|GO:0055085|GO:0005355	136336276	chr9	136336217	-	hs|9q34.2	NM_017585	chr9:136336276-136336217	NM_017585	Hs.244378
A_33_P3379535	2.07772	1.055	2.07772	up			FALSE	Homo sapiens cDNA FLJ45698 fis, clone FEBRA2017811. [AK127601]			50271771	chr12	50271712	-	hs|12q13.12	AK127601	chr12:50271771-50271712		Hs.689518
A_21_P0012069	4.19149	2.06746	4.19149	up			FALSE				60597070	chr2	60586951	-	hs|2p16.1		chr2:60597070-60586951		Hs.642036
A_33_P3258617	2.05351	1.03809	2.05351	up	PLIN2	perilipin 2	FALSE	perilipin 2 [Source:HGNC Symbol;Acc:HGNC:248] [ENST00000380464]	123	GO:0005811|GO:0014070|GO:0005886|GO:0019915|GO:0005783|GO:0042493|GO:0005634|GO:0005576|GO:0044281|GO:0015909|GO:0044255|GO:0005829	19123462	chr9	19123403	-	hs|9p22.1		chr9:19123462-19123403
A_33_P3380992	2.59853	1.3777	2.59853	up	AKR1B15	aldo-keto reductase family 1, member B15	FALSE	Homo sapiens aldo-keto reductase family 1, member B15 (AKR1B15), mRNA [NM_001080538]	441282	GO:0016491|GO:0055114	134262527	chr7	134262468	+	hs|7q33	NM_001080538	chr7:134262468-134262527	NM_001080538	Hs.729418
A_24_P147540	3.03574	1.60205	3.03574	up	PRR36	proline rich 36	FALSE	Homo sapiens proline rich 36 (PRR36), transcript variant 1, mRNA [NM_001190467]	80164		7934686	chr19	7934627	-	hs|19p13.2	NM_001190467	chr19:7934686-7934627	NM_001190467	Hs.288540
A_33_P3390057	2.38199	1.25217	2.38199	up	TM4SF1	transmembrane 4 L six family member 1	FALSE	Homo sapiens transmembrane 4 L six family member 1 (TM4SF1), mRNA [NM_014220]	4071	GO:0008150|GO:0003674|GO:0005887	149086869	chr3	149086810	-	hs|3q25.1	NM_014220	chr3:149086869-149086810	NM_014220	Hs.351316
A_21_P0009233	2.16727	1.11588	2.16727	up	lnc-PIPOX-1	lnc-PIPOX-1:1	FALSE	LNCipedia lincRNA (lnc-PIPOX-1), lincRNA [lnc-PIPOX-1:1]			27343688	chr17	27343629	+	hs|17q11.2		chr17:27343629-27343688
A_33_P3399468	4.32084	2.11131	4.32084	up	LOC100133182	uncharacterized LOC100133182	FALSE	PREDICTED: Homo sapiens uncharacterized LOC100133182 (LOC100133182), misc_RNA [XR_429801]	100133182		90235494	chr16	90235435	+	hs|16q24.3	XR_429801	chr16:90235435-90235494	XR_429801	Hs.661255
A_33_P3210934	2.93204	1.55191	2.93204	up	PCDHA13	protocadherin alpha 13	FALSE	Homo sapiens protocadherin alpha 13 (PCDHA13), transcript variant 2, mRNA [NM_031865]	56136	GO:0005886|GO:0005509|GO:0016021|GO:0007156	140264278	chr5	140264219	+	hs|5q31.3	NM_031865	chr5:140264219-140264278	NM_031865	Hs.199343
A_33_P3291414	2.1382	1.09639	2.1382	up	LOC100996573	uncharacterized LOC100996573	FALSE	PREDICTED: Homo sapiens uncharacterized LOC100996573 (LOC100996573), mRNA [XM_003846565]	100996573		133129752	chr12	133129693	+	hs|12q24.33	XM_003846565	chr12:133129693-133129752	XM_003846565	Hs.678863
A_33_P3366903	2.27694	1.18709	2.27694	up	CHST6	carbohydrate (N-acetylglucosamine 6-O) sulfotransferase 6	FALSE	Homo sapiens carbohydrate (N-acetylglucosamine 6-O) sulfotransferase 6 (CHST6), mRNA [NM_021615]	4166	GO:0006790|GO:0005794|GO:0018146|GO:0000139|GO:0005975|GO:0009405|GO:0006044|GO:0044281|GO:0016021|GO:0001517|GO:0030203|GO:0042339	75512463	chr16	75512404	-	hs|16q23.1	NM_021615	chr16:75512463-75512404	NM_021615	Hs.655622
A_32_P356316	4.44884	2.15343	4.44884	up	HLA-DOA	major histocompatibility complex, class II, DO alpha	FALSE	Homo sapiens major histocompatibility complex, class II, DO alpha (HLA-DOA), mRNA [NM_002119]	3111	GO:0019886|GO:0007165|GO:0006955|GO:0005886|GO:0002587|GO:0045580|GO:0023026|GO:0042613|GO:0016021|GO:0005765|GO:0032395|GO:0010008	32972029	chr6	32971970	-	hs|6p21.32	NM_002119	chr6:32972029-32971970	NM_002119	Hs.631991
A_33_P3219121	2.46328	1.30058	2.46328	up	KALRN	kalirin, RhoGEF kinase	FALSE	kalirin, RhoGEF kinase [Source:HGNC Symbol;Acc:HGNC:4814] [ENST00000393501]	8997	GO:0005515|GO:0051056|GO:0048011|GO:0043065|GO:0048013|GO:0007264|GO:0015629|GO:0097190|GO:0005524|GO:0046872|GO:0005829|GO:0007399|GO:0043547|GO:0035556|GO:0005085|GO:0007165|GO:0032321|GO:0004674|GO:0007411|GO:0006468|GO:0005089|GO:0016192|GO:0070062	124207584	chr3	124207525	+	hs|3q21.2	AK131379	chr3:124207525-124207584		Hs.8004
A_23_P216429	2.26778	1.18128	2.26778	up	ASPN	asporin	FALSE	Homo sapiens asporin (ASPN), transcript variant 1, mRNA [NM_017680]	54829	GO:0031012|GO:0070171|GO:0005518|GO:0005509|GO:0005578|GO:0030282|GO:0030512	95218993	chr9	95218934	-	hs|9q22.31	NM_017680	chr9:95218993-95218934	NM_017680	Hs.435655
A_21_P0002202	3.05603	1.61166	3.05603	up	LOC388942	uncharacterized LOC388942	FALSE		388942		42105072	chr2	42105013	+	hs|2p21		chr2:42105013-42105072
A_19_P00321670	2.02742	1.01964	2.02742	up			FALSE	zt85h04.r1 Soares_testis_NHT Homo sapiens cDNA clone IMAGE:729175 5', mRNA sequence [AA397666]			43819919	chr6	43819860	-	hs|6p21.1		chr6:43819919-43819860		Hs.634195
A_33_P3596355	2.66494	1.4141	2.66494	up	LINC00622	long intergenic non-protein coding RNA 622	FALSE	602301760F1 NIH_MGC_87 Homo sapiens cDNA clone IMAGE:4403366 5', mRNA sequence [BG033631]	644242							BG033631			Hs.515383
A_33_P3210827	2.02347	1.01683	2.02347	up	RAD51D	RAD51 paralog D	FALSE	Homo sapiens RAD51 paralog D (RAD51D), transcript variant 1, mRNA [NM_002878]	5892	GO:0000400|GO:0005515|GO:0000781|GO:0005813|GO:0043015|GO:0005657|GO:0005634|GO:0003677|GO:0005524|GO:0005737|GO:0006281|GO:0000723|GO:0003697|GO:0000724|GO:0042148|GO:0033063|GO:0008094|GO:0007131	33445583	chr17	33445524	-	hs|17q12	NM_002878	chr17:33445583-33445524	NM_002878	Hs.631757
A_19_P00315452	2.15987	1.11094	2.15987	up	LOC100130938	uncharacterized LOC100130938	FALSE	PREDICTED: Homo sapiens uncharacterized LOC100130938 (LOC100130938), transcript variant X1, ncRNA [XR_110148]	100130938		59273360	chr18	59273301	-	hs|18q21.33	XR_110148	chr18:59273360-59273301	XR_110148	Hs.710069
A_32_P480177	4.34658	2.11988	4.34658	up	TNN	tenascin N	FALSE	Homo sapiens tenascin N (TNN), mRNA [NM_022093]	63923	GO:0003674|GO:0005178|GO:0016477|GO:0009986|GO:0007160|GO:0005578|GO:0016049|GO:0007409|GO:0005575|GO:0042802	175116792	chr1	175116733	+	hs|1q25.1	NM_022093	chr1:175116733-175116792	NM_022093	Hs.156369
A_24_P672240	2.91243	1.54222	2.91243	up	FRMPD4	FERM and PDZ domain containing 4	FALSE	Homo sapiens FERM and PDZ domain containing 4 (FRMPD4), mRNA [NM_014728]	9758	GO:0005515|GO:0043197|GO:0051835|GO:0005546|GO:0005856	12742430	chrX	12742371	+	hs|Xp22.2	NM_014728	chrX:12742371-12742430	NM_014728	Hs.657507
A_33_P3219398	4.5591	2.18875	4.5591	up	ZNF521	zinc finger protein 521	FALSE	Homo sapiens zinc finger protein 521 (ZNF521), mRNA [NM_015461]	25925	GO:0006355|GO:0019904|GO:0007275|GO:0005634|GO:0003677|GO:0046872|GO:0030154|GO:0006351	22804452	chr18	22804393	-	hs|18q11.2	NM_015461	chr18:22804452-22804393	NM_015461	Hs.116935
A_24_P129341	2.21538	1.14756	2.21538	up	AKR1B10	aldo-keto reductase family 1, member B10 (aldose reductase)	FALSE	Homo sapiens aldo-keto reductase family 1, member B10 (aldose reductase) (AKR1B10), mRNA [NM_020299]	57016	GO:0005515|GO:0044598|GO:0047718|GO:0045550|GO:0044597|GO:0001758|GO:0007603|GO:0007586|GO:0006081|GO:0001523|GO:0005764|GO:0005829|GO:0004033|GO:0016488|GO:0008202|GO:0070062|GO:0055114	134225858	chr7	134225799	+	hs|7q33	NM_020299	chr7:134225799-134225858	NM_020299	Hs.116724
A_21_P0002442	3.90376	1.96487	3.90376	up	lnc-FANCL-2	lnc-FANCL-2:1	FALSE	LNCipedia lincRNA (lnc-FANCL-2), lincRNA [lnc-FANCL-2:1]			57542626	chr2	57541624	-	hs|2p16.1		chr2:57542626-57541624
A_33_P3254291	2.32315	1.21608	2.32315	up	CNOT4	CCR4-NOT transcription complex, subunit 4	FALSE	Homo sapiens CCR4-NOT transcription complex, subunit 4 (CNOT4), transcript variant 4, mRNA [NM_001190848]	4850	GO:0005515|GO:0010467|GO:0004842|GO:0000166|GO:0016874|GO:0008270|GO:0005634|GO:0030014|GO:0000289|GO:0051865|GO:0005829|GO:0000288	135072846	chr7	135072787	-	hs|7q33	NM_001190848	chr7:135072846-135072787	NM_001190848	Hs.490224
A_21_P0007485	2.27025	1.18285	2.27025	up	LOC101927292	uncharacterized LOC101927292	FALSE	Homo sapiens uncharacterized LOC101927292 (LOC101927292), long non-coding RNA [NR_110048]	101927292		50320109	chr12	50320050	+	hs|12q13.12	NR_110048	chr12:50320050-50320109	NR_110048	Hs.129345
A_19_P00812310	2.43656	1.28484	2.43656	up	lnc-ITSN1-2	lnc-ITSN1-2:5	FALSE	LNCipedia lincRNA (lnc-ITSN1-2), lincRNA [lnc-ITSN1-2:5]			35350663	chr21	35350604	+	hs|21q22.11		chr21:35350604-35350663
A_33_P3215797	2.06895	1.0489	2.06895	up	AHDC1	AT hook, DNA binding motif, containing 1	FALSE	Homo sapiens AT hook, DNA binding motif, containing 1 (AHDC1), mRNA [NM_001029882]	27245	GO:0003677	27877922	chr1	27877863	-	hs|1p36.11	NM_001029882	chr1:27877922-27877863	NM_001029882	Hs.469280
A_19_P00319829	2.37185	1.24601	2.37185	up	LOC220729	succinate dehydrogenase complex, subunit A, flavoprotein (Fp) pseudogene	FALSE	DA773741 OCBBF2 Homo sapiens cDNA clone OCBBF2007273 5', mRNA sequence [DA773741]	220729		197305532	chr3	197305473	-	hs|3q29	XR_425697	chr3:197305532-197305473	XR_425697	Hs.739295
A_33_P3317392	2.61623	1.38749	2.61623	up	ADAMTS19	ADAM metallopeptidase with thrombospondin type 1 motif, 19	FALSE	Homo sapiens ADAM metallopeptidase with thrombospondin type 1 motif, 19 (ADAMTS19), mRNA [NM_133638]	171019	GO:0006508|GO:0005578|GO:0008270|GO:0004222	129074293	chr5	129074234	+	hs|5q23.3	NM_133638	chr5:129074234-129074293	NM_133638	Hs.23751
A_21_P0010991	2.68739	1.42621	2.68739	up	LOC101929174	uncharacterized LOC101929174	FALSE	PREDICTED: Homo sapiens uncharacterized LOC101929174 (LOC101929174), ncRNA [XR_424270]	101929174		88161237	chr11	88161178	+	hs|11q14.2	XR_424270	chr11:88161178-88161237	XR_424270	Hs.569035
A_21_P0005728	3.26521	1.70718	3.26521	up	LOC102724874	uncharacterized LOC102724874	FALSE		102724874		78311372	chr8	78311313	+	hs|8q21.12		chr8:78311313-78311372		Hs.571511
A_21_P0000361	2.73939	1.45385	2.73939	up	SNORA79	small nucleolar RNA, H/ACA box 79	FALSE	Homo sapiens small nucleolar RNA, H/ACA box 79 (SNORA79), small nucleolar RNA [NR_003021]	677845		81669099	chr14	81669040	-	hs|14q31.1	NR_003021	chr14:81669099-81669040	NR_003021	Hs.693251
A_33_P3260175	35.6771	5.15693	35.6771	up			FALSE				16860561	chr1	16860502	-	hs|1p36.13	BC036435	chr1:16860561-16860502		Hs.645945
A_33_P3367596	2.02452	1.01758	2.02452	up	CLCN4	chloride channel, voltage-sensitive 4	FALSE	Homo sapiens chloride channel, voltage-sensitive 4 (CLCN4), transcript variant 1, mRNA [NM_001830]	1183	GO:0006821|GO:0005247|GO:0005254|GO:0005524|GO:0055085|GO:0044070|GO:0015297|GO:0034220|GO:0031901|GO:0031902|GO:0006810|GO:0016021|GO:0010008	10201737	chrX	10201678	+	hs|Xp22.2	NM_001830	chrX:10201678-10201737	NM_001830	Hs.495674
A_21_P0013086	3.35023	1.74426	3.35023	up	LOC101928307	uncharacterized LOC101928307	FALSE	Homo sapiens uncharacterized LOC101928307 (LOC101928307), long non-coding RNA [NR_125872]	101928307		69342796	chr6	69342737	-	hs|6q12	NR_125872	chr6:69342796-69342737	NR_125872	Hs.535825
A_33_P3310296	2.09657	1.06803	2.09657	up			FALSE				43252830	chr20	43252771	+	hs|20q13.12		chr20:043252771-043252830
A_23_P90888	8.85676	3.14678	8.85676	up	CHRNA1	cholinergic receptor, nicotinic, alpha 1 (muscle)	FALSE	Homo sapiens cholinergic receptor, nicotinic, alpha 1 (muscle) (CHRNA1), transcript variant 1, mRNA [NM_001039523]	1134	GO:0048630|GO:0031594|GO:0030054|GO:0005886|GO:0009986|GO:0007268|GO:0007274|GO:0046716|GO:0005892|GO:0019228|GO:0050905|GO:0007165|GO:0034220|GO:0050881|GO:0003009|GO:0007528|GO:0045211|GO:0015464|GO:0042391|GO:0042166|GO:0006810|GO:0070050|GO:0005216|GO:0004889	175614896	chr2	175614837	-	hs|2q31.1	NM_001039523	chr2:175614896-175614837	NM_001039523	Hs.434479
A_33_P3376947	13.1842	3.72073	13.1842	up	ABCB9	ATP-binding cassette, sub-family B (MDR/TAP), member 9	FALSE	ATP-binding cassette, sub-family B (MDR/TAP), member 9 [Source:HGNC Symbol;Acc:HGNC:50] [ENST00000537276]	23457	GO:0005515|GO:0002474|GO:0005783|GO:0030176|GO:0005765|GO:0015031|GO:0055085|GO:0005524|GO:0005764|GO:0042803|GO:0015833|GO:0022891|GO:0008152|GO:0016021|GO:0015440|GO:0005769	123416788	chr12	123416729	-	hs|12q24.31	AK027624	chr12:123416788-123416729
A_21_P0013793	2.35208	1.23394	2.35208	up	CROCC	ciliary rootlet coiled-coil, rootletin	FALSE	Homo sapiens ciliary rootlet coiled-coil, rootletin (CROCC), mRNA [NM_014675]	9696	GO:0005515|GO:0005813|GO:0010457|GO:0005886|GO:0033365|GO:0005814|GO:0015629|GO:0051297|GO:0005737|GO:0007049|GO:0008104|GO:0005198|GO:0035253|GO:0030030|GO:0019894|GO:0070062	17264184	chr1	17263358	+	hs|1p36.13	NM_014675	chr1:17263358-17264184	NM_014675	Hs.309403
A_23_P367013	2.24371	1.16589	2.24371	up	TAS2R60	taste receptor, type 2, member 60	FALSE	Homo sapiens taste receptor, type 2, member 60 (TAS2R60), mRNA [NM_177437]	338398	GO:0050913|GO:0033038|GO:0007186|GO:0005886|GO:0004930|GO:0016021|GO:0001580	143140794	chr7	143140735	+	hs|7q35	NM_177437	chr7:143140735-143140794	NM_177437	Hs.688222
A_33_P3311668	10.1519	3.34368	10.1519	up			FALSE	aa43c10.r1 Soares_NhHMPu_S1 Homo sapiens cDNA clone IMAGE:823698 5', mRNA sequence [AA489744]			3866965	chr12	3866906	+	hs|12p13.32	AA489744	chr12:3866906-3866965		Hs.577721
A_23_P164057	2.79728	1.48403	2.79728	up	MFAP4	microfibrillar-associated protein 4	FALSE	Homo sapiens microfibrillar-associated protein 4 (MFAP4), transcript variant 2, mRNA [NM_002404]	4239	GO:0005515|GO:0009650|GO:0010712|GO:0001527|GO:0005576|GO:0071953|GO:0071493|GO:0031012|GO:0003674|GO:0030198|GO:0043206|GO:0007155|GO:0048251|GO:0070062	19286872	chr17	19286813	-	hs|17p11.2	NM_002404	chr17:19286872-19286813	NM_002404	Hs.296049
A_24_P126741	2.13256	1.09259	2.13256	up			FALSE	glutaredoxin (thioltransferase) pseudogene 3 [Source:HGNC Symbol;Acc:HGNC:34049] [ENST00000470810]			161178628	chr5	161178569	-	hs|5q34		chr5:161178628-161178569
A_33_P3236340	2.40967	1.26884	2.40967	up			FALSE	Homo sapiens clone pp7683 unknown mRNA. [AF289593]			6693935	chr4	6693876	-	hs|4p16.1	AF289593	chr4:6693935-6693876		Hs.543740
A_21_P0010861	2.46145	1.29951	2.46145	up	LINC00202-1	long intergenic non-protein coding RNA 202-1	FALSE	long intergenic non-protein coding RNA 202-1 [Source:HGNC Symbol;Acc:HGNC:24672] [ENST00000458682]	387644		27223498	chr10	27223439	-	hs|10p12.1		chr10:27223498-27223439
A_23_P12858	2.52181	1.33446	2.52181	up	TBATA	thymus, brain and testes associated	FALSE	Homo sapiens thymus, brain and testes associated (TBATA), mRNA [NM_152710]	219793	GO:0007275|GO:0005634|GO:0007283|GO:0030154|GO:0005829	72534060	chr10	72534001	-	hs|10q22.1	NM_152710	chr10:72534060-72534001	NM_152710	Hs.386698
A_24_P357726	2.15862	1.11011	2.15862	up	PSG8	pregnancy specific beta-1-glycoprotein 8	FALSE	Homo sapiens pregnancy specific beta-1-glycoprotein 8 (PSG8), transcript variant 1, mRNA [NM_182707]	440533	GO:0005576	43259206	chr19	43259147	-	hs|19q13.2	NM_182707	chr19:43259206-43259147	NM_182707	Hs.466843
A_21_P0013145	2.29957	1.20137	2.29957	up			FALSE				85130914	chr6	85130855	-	hs|6q14.3		chr6:85130914-85130855		Hs.171384
A_32_P146659	2.42439	1.27762	2.42439	up	ATP6V0E2-AS1	ATP6V0E2 antisense RNA 1	FALSE	Homo sapiens ATP6V0E2 antisense RNA 1 (ATP6V0E2-AS1), long non-coding RNA [NR_027040]	401431		149564956	chr7	149564897	-	hs|7q36.1	NR_027040	chr7:149564956-149564897	NR_027040	Hs.744860
A_21_P0011770	2.18545	1.12793	2.18545	up	LINC01535	long intergenic non-protein coding RNA 1535	FALSE	Homo sapiens long intergenic non-protein coding RNA 1535 (LINC01535), transcript variant 1, long non-coding RNA [NR_110718]	101927667		37754324	chr19	37754265	+	hs|19q13.12		chr19:37754265-37754324	NR_110718	Hs.633102
A_21_P0001780	3.00083	1.58536	3.00083	up	LOC101927881	uncharacterized LOC101927881	FALSE	Homo sapiens uncharacterized LOC101927881 (LOC101927881), long non-coding RNA [NR_110278]	101927881		129626150	chr2	129626091	+	hs|2q14.3		chr2:129626091-129626150	NR_110278	Hs.570247
A_33_P3265129	11.8244	3.56369	11.8244	up	ACSM2A	acyl-CoA synthetase medium-chain family member 2A	FALSE	Homo sapiens cDNA FLJ34659 fis, clone KIDNE2018863. [AK091978]	123876	GO:0005739|GO:0036112|GO:0005759|GO:0006631|GO:0070328|GO:0042593|GO:0005524|GO:0047760|GO:0046872	20499944	chr16	20499885	+	hs|16p12.3	AK091978	chr16:20499885-20499944		Hs.656497
A_33_P3327772	2.00315	1.00227	2.00315	up	ATP7A	ATPase, Cu++ transporting, alpha polypeptide	FALSE	Homo sapiens ATPase, Cu++ transporting, alpha polypeptide (ATP7A), transcript variant 1, mRNA [NM_000052]	538	GO:0005802|GO:0005515|GO:0010468|GO:0051353|GO:0051216|GO:0018205|GO:0031526|GO:0051542|GO:0010043|GO:0021860|GO:0010041|GO:0031069|GO:0043524|GO:0006878|GO:0034220|GO:0030198|GO:0019430|GO:0030199|GO:0043025|GO:0060003|GO:0048251|GO:0046034|GO:0005794|GO:0032767|GO:0048286|GO:0005507|GO:0043085|GO:0001701|GO:0048553|GO:0048554|GO:0006584|GO:0043588|GO:0007005|GO:0000302|GO:0043005|GO:0048471|GO:…	77302507	chrX	77302448	+	hs|Xq21.1	NM_000052	chrX:77302448-77302507	NM_000052	Hs.496414
A_23_P169092	5.55801	2.47457	5.55801	up	CYP7B1	cytochrome P450, family 7, subfamily B, polypeptide 1	FALSE	Homo sapiens cytochrome P450, family 7, subfamily B, polypeptide 1 (CYP7B1), mRNA [NM_004820]	9420	GO:0050679|GO:0006805|GO:0005506|GO:0006699|GO:0008396|GO:0060740|GO:0044281|GO:0055085|GO:0005789|GO:0008206|GO:0033783|GO:0016125|GO:0033147|GO:0055114|GO:0008203|GO:0020037	65527626	chr8	65517399	-	hs|8q12.3	NM_004820	chr8:65527626-65517399	NM_004820	Hs.667720
A_32_P119569	2.41935	1.27462	2.41935	up	GOLGA8EP	golgin A8 family, member E, pseudogene	FALSE	Homo sapiens golgin A8 family, member E, pseudogene (GOLGA8EP), non-coding RNA [NR_033350]	390535		23438849	chr15	23437935	+	hs|15q11.2	NR_033350	chr15:23437935-23438849	NR_033350	Hs.454647
A_33_P3276297	2.53986	1.34475	2.53986	up			FALSE	Homo sapiens putative protein STRF7 (STRF7) mRNA, complete cds. [AY326463]			144167345	chr6	144167286	-	hs|6q24.2	AY326463	chr6:144167345-144167286
A_21_P0001619	2.17693	1.12229	2.17693	up	lnc-BATF3-2	lnc-BATF3-2:3	FALSE	LNCipedia lincRNA (lnc-BATF3-2), lincRNA [lnc-BATF3-2:3]			212802635	chr1	212802576	-	hs|1q32.3		chr1:212802635-212802576
A_33_P3289113	2.26386	1.17879	2.26386	up	COX11	COX11 cytochrome c oxidase copper chaperone	FALSE	cytochrome c oxidase assembly homolog 11 (yeast) [Source:HGNC Symbol;Acc:HGNC:2261] [ENST00000572088]	1353	GO:0005739|GO:0008535|GO:0007585|GO:0005507|GO:0004129|GO:0005743|GO:0009055|GO:0033132|GO:0016021	53029524	chr17	53029465	-	hs|17q22	AK124809	chr17:53029524-53029465		Hs.591171
A_21_P0008252	9.66185	3.2723	9.66185	up	lnc-TSC22D1-1	lnc-TSC22D1-1:4	FALSE	LNCipedia lincRNA (lnc-TSC22D1-1), lincRNA [lnc-TSC22D1-1:4]			44974260	chr13	44974201	-	hs|13q14.11		chr13:44974260-44974201
A_33_P3416420	2.43608	1.28456	2.43608	up	ZUFSP	zinc finger with UFM1-specific peptidase domain	FALSE	Homo sapiens zinc finger with UFM1-specific peptidase domain (ZUFSP), mRNA [NM_145062]	221302	GO:0046872	116980048	chr6	116979989	-	hs|6q22.1	NM_145062	chr6:116980048-116979989	NM_145062	Hs.29857
A_23_P250385	2.04766	1.03398	2.04766	up	HIST1H1B	histone cluster 1, H1b	FALSE	Homo sapiens histone cluster 1, H1b (HIST1H1B), mRNA [NM_005322]	3009	GO:0000790|GO:0042826|GO:0030307|GO:0006325|GO:0006334|GO:0050821|GO:0000122|GO:0031490|GO:0051574|GO:0005720|GO:0071169|GO:0000786|GO:0070062	27834688	chr6	27834629	-	hs|6p22.1	NM_005322	chr6:27834688-27834629	NM_005322	Hs.131956
A_33_P3294377	2.58721	1.3714	2.58721	up	lnc-RP11-1105G2.3.1-3	lnc-RP11-1105G2.3.1-3:1	FALSE	DA880232 PROST2 Homo sapiens cDNA clone PROST2019563 5', mRNA sequence [DA880232]			94288901	chr12	94288842	-	hs|12q22	DA880232	chr12:94288901-94288842		Hs.577495
A_21_P0007198	2.46003	1.29868	2.46003	up	lnc-API5-4	lnc-API5-4:2	FALSE	LNCipedia lincRNA (lnc-API5-4), lincRNA [lnc-API5-4:2]			41881372	chr11	41881313	+	hs|11p12		chr11:41881313-41881372
A_21_P0007544	2.12573	1.08796	2.12573	up	LOC100288798	uncharacterized LOC100288798	FALSE	Homo sapiens uncharacterized LOC100288798 (LOC100288798), transcript variant 5, long non-coding RNA [NR_125381]	100288798		46781710	chr12	46781651	+	hs|12q13.11	NR_125381	chr12:46781651-46781710	NR_125381	Hs.730135
A_33_P3247057	3.06771	1.61716	3.06771	up	SMIM5	small integral membrane protein 5	FALSE	Homo sapiens small integral membrane protein 5 (SMIM5), transcript variant 1, mRNA [NM_001162995]	643008	GO:0016021	73637484	chr17	73637425	+	hs|17q25.1	NM_001162995	chr17:73637425-73637484	NM_001162995	Hs.528605
A_33_P3400217	3.51282	1.81263	3.51282	up	SLC4A1	solute carrier family 4 (anion exchanger), member 1 (Diego blood group)	FALSE	Homo sapiens solute carrier family 4 (anion exchanger), member 1 (Diego blood group) (SLC4A1), mRNA [NM_000342]	6521	GO:0006820|GO:0005515|GO:0008509|GO:0006821|GO:0030018|GO:0005886|GO:0072562|GO:0044281|GO:0042803|GO:0016323|GO:0005452|GO:0015108|GO:0015301|GO:0015106|GO:0070062|GO:0006811|GO:0030506|GO:0006873|GO:0003779|GO:0008022|GO:0055085|GO:0005887|GO:0015701|GO:0051453|GO:0030863|GO:0016021|GO:0043495	42330628	chr17	42330569	-	hs|17q21.31	NM_000342	chr17:42330628-42330569	NM_000342	Hs.443948
A_21_P0004812	2.47069	1.30491	2.47069	up	lnc-AL035696.1-4	lnc-AL035696.1-4:1	FALSE	LNCipedia lincRNA (lnc-AL035696.1-4), lincRNA [lnc-AL035696.1-4:1]			237162	chr6	237103	+	hs|6p25.3		chr6:237103-237162
A_21_P0004345	2.8025	1.48671	2.8025	up	lnc-CNOT6-1	lnc-CNOT6-1:1	FALSE	LNCipedia lincRNA (lnc-CNOT6-1), lincRNA [lnc-CNOT6-1:1]			179910489	chr5	179910430	+	hs|5q35.3		chr5:179910430-179910489
A_23_P19182	2.24159	1.16452	2.24159	up	REEP2	receptor accessory protein 2	FALSE	Homo sapiens receptor accessory protein 2 (REEP2), transcript variant 2, mRNA [NM_016606]	51308	GO:0005881|GO:0032386|GO:0050913|GO:0005887|GO:0005783|GO:0071786|GO:0031883|GO:0005789|GO:0050916|GO:0032596|GO:0070062	137782636	chr5	137782577	+	hs|5q31.2	NM_016606	chr5:137782577-137782636	NM_016606	Hs.416090
A_21_P0004782	4.03647	2.0131	4.03647	up			FALSE	RST22847 Athersys RAGE Library Homo sapiens cDNA, mRNA sequence [BG203464]			140177383	chr6	140177324	-	hs|6q24.1		chr6:140177383-140177324		Hs.582648
A_33_P3291559	4.46624	2.15906	4.46624	up			FALSE	Homo sapiens cDNA FLJ12279 fis, clone MAMMA1001743, weakly similar to Y BOX BINDING PROTEIN-1. [AK022341]			151826835	chr7	151826776	+	hs|7q36.1	AK022341	chr7:151826776-151826835		Hs.649979
A_33_P3301097	2.37712	1.24922	2.37712	up			FALSE				3912744	chr4	3912685	-	hs|4p16.3		chr4:003912744-003912685
A_32_P189790	3.10779	1.63589	3.10779	up	DKFZp779M0652	uncharacterized DKFZp779M0652	FALSE	Homo sapiens uncharacterized DKFZp779M0652 (DKFZp779M0652), long non-coding RNA [NR_027134]	374387		45793907	chr11	45793848	+	hs|11p11.2	NR_027134	chr11:45793848-45793907	NR_027134	Hs.632142
A_33_P3355717	2.34979	1.23253	2.34979	up			FALSE	Homo sapiens cDNA FLJ39779 fis, clone SPLEN2001945. [AK097098]			69262570	chr14	69262511	-	hs|14q24.1	AK097098	chr14:69262570-69262511		Hs.734777
A_33_P3419485	2.1333	1.09309	2.1333	up			FALSE	BX106402 Soares_NFL_T_GBC_S1 Homo sapiens cDNA clone IMAGp998J223812, mRNA sequence [BX106402]			94242644	chr8	94242585	+	hs|8q22.1	BX106402	chr8:94242585-94242644		Hs.545329
A_19_P00324814	2.22906	1.15643	2.22906	up	XLOC_l2_015561		FALSE	BROAD Institute lincRNA (XLOC_l2_015561), lincRNA [TCONS_l2_00030253]			73231964	chrX	73231905	+	hs|Xq13.2		chrX:73231905-73231964
A_33_P3325643	14.341	3.84208	14.341	up	LINC00487	long intergenic non-protein coding RNA 487	FALSE	Homo sapiens long intergenic non-protein coding RNA 487 (LINC00487), long non-coding RNA [NR_038369]	400941		6910270	chr2	6910211	-	hs|2p25.2		chr2:6910270-6910211	NR_038369	Hs.446195
A_21_P0011781	2.18811	1.12968	2.18811	up	PSG8	pregnancy specific beta-1-glycoprotein 8	FALSE	Homo sapiens pregnancy specific beta-1-glycoprotein 8 (PSG8), transcript variant 2, mRNA [NM_001130167]	440533	GO:0005576	43256909	chr19	43256850	-	hs|19q13.2	NM_001130167	chr19:43256909-43256850	NM_001130167	Hs.466843
A_33_P3285092	2.27488	1.18579	2.27488	up	LOC100129763	uncharacterized LOC100129763	FALSE	Homo sapiens cDNA FLJ44135 fis, clone THYMU2009134. [AK126123]	100129763		8243865	chr4	8243806	+	hs|4p16.1	AK126123	chr4:8243806-8243865		Hs.636684
A_33_P3319937	3.52424	1.81731	3.52424	up			FALSE				12523165	chr8	12523106	-	hs|8p23.1		chr8:012523165-012523106
A_33_P3255404	3.34939	1.7439	3.34939	up	CLDN11	claudin 11	FALSE	Homo sapiens claudin 11 (CLDN11), transcript variant 1, mRNA [NM_005602]	5010	GO:0016338|GO:0005886|GO:0005198|GO:0045178|GO:0016021|GO:0007283|GO:0005923|GO:0008366|GO:0070062|GO:0042802	170151883	chr3	170151824	+	hs|3q26.2	NM_005602	chr3:170151824-170151883	NM_005602	Hs.31595
A_21_P0001553	2.14345	1.09994	2.14345	up	lnc-DPYD-1	lnc-DPYD-1:1	FALSE	LNCipedia lincRNA (lnc-DPYD-1), lincRNA [lnc-DPYD-1:1]			98389882	chr1	98389823	-	hs|1p21.3		chr1:98389882-98389823
A_32_P167471	2.44343	1.28891	2.44343	up	CLMN	calmin (calponin-like, transmembrane)	FALSE	Homo sapiens calmin (calponin-like, transmembrane) (CLMN), mRNA [NM_024734]	79789	GO:0005737|GO:0008285|GO:0003779|GO:0016021|GO:0031175	95648676	chr14	95648617	-	hs|14q32.13	NM_024734	chr14:95648676-95648617	NM_024734	Hs.301478
A_33_P3377229	4.2058	2.07238	4.2058	up	C11orf21	chromosome 11 open reading frame 21	FALSE	Homo sapiens chromosome 11 open reading frame 21 (C11orf21), transcript variant 1, mRNA [NM_001142946]	29125	GO:0005737	2317566	chr11	2317507	-	hs|11p15.5	NM_001142946	chr11:2317566-2317507	NM_001142946	Hs.559181
A_23_P160226	2.42695	1.27914	2.42695	up	MROH7	maestro heat-like repeat family member 7	FALSE	Homo sapiens maestro heat-like repeat family member 7 (MROH7), transcript variant 1, mRNA [NM_001039464]	374977	GO:0016021|GO:0005615	55175922	chr1	55175863	+	hs|1p32.3	NM_001039464	chr1:55175863-55175922	NM_001039464	Hs.412482
A_24_P94319	3.16697	1.6631	3.16697	up	C1orf177	chromosome 1 open reading frame 177	FALSE	Homo sapiens chromosome 1 open reading frame 177 (C1orf177), transcript variant 1, mRNA [NM_152607]	163747		55280654	chr1	55280595	+	hs|1p32.3	NM_152607	chr1:55280595-55280654	NM_152607	Hs.376018
A_33_P3379056	2.26107	1.177	2.26107	up			FALSE				79390450	chr17	79390391	-	hs|17q25.3		chr17:079390450-079390391
A_19_P00315593	7.18158	2.8443	7.18158	up			FALSE				173132674	chr5	173132615	+	hs|5q35.2		chr5:173132615-173132674		Hs.582570
A_33_P3259865	2.11315	1.0794	2.11315	up	C1orf220	chromosome 1 open reading frame 220	FALSE	Homo sapiens chromosome 1 open reading frame 220 (C1orf220), long non-coding RNA [NR_033186]	400798		178518024	chr1	178517965	+	hs|1q25.2	NR_033186	chr1:178517965-178518024	NR_033186	Hs.668085
A_33_P3368193	13.6383	3.76959	13.6383	up	PNLIPRP3	pancreatic lipase-related protein 3	FALSE	Homo sapiens pancreatic lipase-related protein 3 (PNLIPRP3), mRNA [NM_001011709]	119548	GO:0016042|GO:0004806|GO:0005576	118237459	chr10	118237400	+	hs|10q25.3	NM_001011709	chr10:118237400-118237459	NM_001011709	Hs.276724
A_21_P0000541	2.40477	1.2659	2.40477	up	LOC100128164	four and a half LIM domains 1 pseudogene	FALSE	Homo sapiens four and a half LIM domains 1 pseudogene (LOC100128164), transcript variant 1, non-coding RNA [NR_027622]	100128164		169661931	chr3	169661872	-	hs|3q26.2	NR_027622	chr3:169661931-169661872	NR_027622	Hs.633070
A_24_P275585	2.91412	1.54306	2.91412	up	IQCH	IQ motif containing H	FALSE	Homo sapiens IQ motif containing H (IQCH), transcript variant 1, mRNA [NM_001031715]	64799		67793409	chr15	67793350	+	hs|15q23	NM_001031715	chr15:67793350-67793409	NM_001031715	Hs.657894
A_23_P66694	3.12485	1.64379	3.12485	up	EVI2B	ecotropic viral integration site 2B	FALSE	Homo sapiens ecotropic viral integration site 2B (EVI2B), mRNA [NM_006495]	2124	GO:0005887	29631839	chr17	29631780	-	hs|17q11.2	NM_006495	chr17:29631839-29631780	NM_006495	Hs.5509
A_33_P3232393	2.39556	1.26037	2.39556	up			FALSE	Uncharacterized protein UNQ6126/PRO20091 [Source:UniProtKB/Swiss-Prot;Acc:Q6UXV3] [ENST00000623531]			47512183	chr22	47512124	-	hs|22q13.31	XR_244448	chr22:47512183-47512124	XR_244448	Hs.689631
A_24_P127719	2.80966	1.4904	2.80966	up	MAFA	v-maf avian musculoaponeurotic fibrosarcoma oncogene homolog A	FALSE	Homo sapiens v-maf avian musculoaponeurotic fibrosarcoma oncogene homolog A (MAFA), mRNA [NM_201589]	389692	GO:0043565|GO:0006355|GO:0003700|GO:0046982|GO:0007263|GO:0045944|GO:0005634|GO:0030073|GO:0003677|GO:0042803|GO:0006351|GO:0009749	144512493	chr8	144512434	-	hs|8q24.3	NM_201589	chr8:144512493-144512434	NM_201589	Hs.521914
A_33_P3337259	2.08307	1.05871	2.08307	up	WASH5P	WAS protein family homolog 5 pseudogene	FALSE	Homo sapiens WAS protein family homolog 5 pseudogene (WASH5P), non-coding RNA [NR_033266]	375690		61457	chr19	61398	-	hs|19p13.3	NR_033266	chr19:61457-61398	NR_033266	Hs.572592
A_21_P0001102	3.38471	1.75903	3.38471	up			FALSE				14675512	chr1	14675453	-	hs|1p36.21		chr1:14675512-14675453
A_33_P3322046	2.49536	1.31925	2.49536	up			FALSE	Q5JNZ5_HUMAN (Q5JNZ5) Ribosomal protein S26-like 1, partial (41%) [THC2596076]			72554039	chr10	72553980	-	hs|10q22.1		chr10:072554039-072553980
A_33_P3302125	2.04805	1.03425	2.04805	up	LCE2A	late cornified envelope 2A	FALSE	Homo sapiens late cornified envelope 2A (LCE2A), mRNA [NM_178428]	353139	GO:0031424	152671918	chr1	152671859	+	hs|1q21.3	NM_178428	chr1:152671859-152671918	NM_178428	Hs.334054
A_33_P3216059	2.0943	1.06647	2.0943	up	ASPN	asporin	FALSE	Homo sapiens asporin (ASPN), transcript variant 2, mRNA [NM_001193335]	54829	GO:0031012|GO:0070171|GO:0005518|GO:0005509|GO:0005578|GO:0030282|GO:0030512	95227261	chr9	95227202	-	hs|9q22.31	NM_001193335	chr9:95227261-95227202	NM_001193335	Hs.435655
A_24_P190472	2.49505	1.31907	2.49505	up	SLPI	secretory leukocyte peptidase inhibitor	FALSE	Homo sapiens secretory leukocyte peptidase inhibitor (SLPI), mRNA [NM_003064]	6590	GO:0032091|GO:0031012|GO:0010951|GO:0005515|GO:0004866|GO:0004867|GO:0019899|GO:0070062|GO:0045071	43882279	chr20	43882220	-	hs|20q13.12	NM_003064	chr20:43882279-43882220	NM_003064	Hs.517070
A_21_P0003364	2.03479	1.02488	2.03479	up			FALSE				55242887	chr4	55242828	+	hs|4q12		chr4:55242828-55242887
A_23_P254031	2.0357	1.02553	2.0357	up	TTF1	transcription termination factor, RNA polymerase I	FALSE	Homo sapiens transcription termination factor, RNA polymerase I (TTF1), transcript variant 1, mRNA [NM_007344]	7270	GO:0006353|GO:0010467|GO:0006355|GO:0005886|GO:0006363|GO:0005730|GO:0006361|GO:0005634|GO:0006360|GO:0003677|GO:0005737|GO:0045814|GO:0003682|GO:0040029|GO:0005654|GO:0006338|GO:0008156	135251448	chr9	135251389	-	hs|9q34.13	NM_007344	chr9:135251448-135251389	NM_007344	Hs.54780
A_32_P226498	2.15167	1.10545	2.15167	up	HAR1A	highly accelerated region 1A (non-protein coding)	FALSE	Homo sapiens highly accelerated region 1A (non-protein coding) (HAR1A), long non-coding RNA [NR_003244]	768096		61735379	chr20	61735320	+	hs|20q13.33	NR_003244	chr20:61735320-61735379	NR_003244	Hs.549606
A_23_P207445	2.30034	1.20185	2.30034	up	MAP2K6	mitogen-activated protein kinase kinase 6	FALSE	Homo sapiens mitogen-activated protein kinase kinase 6 (MAP2K6), mRNA [NM_002758]	5608	GO:0005515|GO:0034142|GO:0070423|GO:0060048|GO:0051403|GO:0035872|GO:0005829|GO:0042692|GO:0002756|GO:0000187|GO:0004702|GO:0002755|GO:0022602|GO:0007050|GO:0005856|GO:0072709|GO:0034138|GO:0004708|GO:0006355|GO:0043065|GO:0038124|GO:0038123|GO:0019901|GO:0042493|GO:0034134|GO:0006915|GO:0018108|GO:0002224|GO:0005524|GO:0006351|GO:0006975|GO:0007165|GO:0051149|GO:0045087|GO:0002931|GO:0009405|GO:…	67538021	chr17	67537962	+	hs|17q24.3	NM_002758	chr17:67537962-67538021	NM_002758	Hs.463978
A_33_P3806676	3.10622	1.63516	3.10622	up			FALSE	T cell receptor beta variable 28 [Source:HGNC Symbol;Acc:HGNC:12209] [ENST00000390400]			142428971	chr7	142428912	+	hs|7q34	AY751906	chr7:142428912-142428971		Hs.722430
A_19_P00317974	3.11097	1.63736	3.11097	up			FALSE				72039481	chr6	72039422	+	hs|6q13		chr6:72039422-72039481
A_21_P0010321	2.16715	1.1158	2.16715	up			FALSE				35339619	chr21	35339560	-	hs|21q22.11		chr21:35339619-35339560
A_32_P115558	2.12183	1.08531	2.12183	up			FALSE	BOVPOUBA polyubiquitin {Bos taurus} (exp=-1; wgp=0; cg=0), partial (41%) [THC2576794]		GO:0005515|GO:0006510|GO:0006511|GO:0006512|GO:0006355|GO:0003735|GO:0006357|GO:0045116|GO:0042254|GO:0006950|GO:0006325|GO:0005634|GO:0003676|GO:0006412|GO:0030162|GO:0005551|GO:0005737|GO:0008104|GO:0005840|GO:0006464	16285923	chr17	16285864	-	hs|17p11.2		chr17:016285923-016285864
A_21_P0001948	2.35411	1.23518	2.35411	up			FALSE				193510259	chr2	193510200	+	hs|2q32.3		chr2:193510200-193510259
A_33_P3321369	2.2119	1.14529	2.2119	up			FALSE	PREDICTED: Homo sapiens uncharacterized LOC145757 (RP11-66B24.1), transcript variant X1, misc_RNA [XR_109231]			101414195	chr15	101414136	+	hs|15q26.3	XR_109231	chr15:101414136-101414195	XR_109231	Hs.730396
A_21_P0002946	5.57167	2.47811	5.57167	up	lnc-TTC21A-2	lnc-TTC21A-2:2	FALSE	LNCipedia lincRNA (lnc-TTC21A-2), lincRNA [lnc-TTC21A-2:2]			39252157	chr3	39252098	+	hs|3p22.2		chr3:39252098-39252157
A_24_P831309	6.97761	2.80273	6.97761	up	C1orf229	chromosome 1 open reading frame 229	FALSE	Homo sapiens chromosome 1 open reading frame 229 (C1orf229), mRNA [NM_207401]	388759		247275358	chr1	247275299	-	hs|1q44	NM_207401	chr1:247275358-247275299	NM_207401	Hs.456511
A_33_P3289860	2.37966	1.25076	2.37966	up			FALSE	Homo sapiens mRNA; cDNA DKFZp686G10213 (from clone DKFZp686G10213). [BX648603]			48087083	chr18	48087024	+	hs|18q21.1	BX648603	chr18:48087024-48087083		Hs.433728
A_23_P153964	2.75579	1.46247	2.75579	up	INHBB	inhibin, beta B	FALSE	Homo sapiens inhibin, beta B (INHBB), mRNA [NM_002193]	3625	GO:0005515|GO:0048471|GO:2001235|GO:0060395|GO:0048599|GO:0005615|GO:0030154|GO:0042803|GO:0001541|GO:0043408|GO:0044320|GO:0045444|GO:0048468|GO:0046676|GO:0009267|GO:0032869|GO:0010862|GO:0046882|GO:0006952|GO:0005576|GO:0042981|GO:0046881|GO:0032924|GO:0005160|GO:0005125|GO:0009612|GO:0005179|GO:0046789|GO:0048178|GO:0008083|GO:0040007|GO:0060279	121108839	chr2	121108780	+	hs|2q14.2	NM_002193	chr2:121108780-121108839	NM_002193	Hs.1735
A_23_P104413	2.98724	1.57882	2.98724	up	DUX4	double homeobox 4	FALSE	Homo sapiens double homeobox 4 (DUX4), mRNA [NM_001293798]	100288687	GO:0031965|GO:0000976|GO:0008285|GO:0045944|GO:0006915|GO:0005654|GO:0005634|GO:0070317|GO:0006351	107030	chrUn_gl000228	106972	+		NM_001293798	chrUn_gl000228:106972-107030	NM_001293798	Hs.728749
A_21_P0000557	2.16334	1.11326	2.16334	up	LINC00882	long intergenic non-protein coding RNA 882	FALSE	Homo sapiens long intergenic non-protein coding RNA 882 (LINC00882), long non-coding RNA [NR_028303]	100302640		106828743	chr3	106828684	-	hs|3q13.12	NR_028303	chr3:106828743-106828684	NR_028303	Hs.648607
A_24_P914513	3.44476	1.7844	3.44476	up	BCKDHB	branched chain keto acid dehydrogenase E1, beta polypeptide	FALSE	Homo sapiens branched chain keto acid dehydrogenase E1, beta polypeptide (BCKDHB), transcript variant 1, mRNA [NM_183050]	594	GO:0003863|GO:0005515|GO:0007584|GO:0009083|GO:0051384|GO:0044281|GO:0051591|GO:0032403|GO:0003826|GO:0005739|GO:0034641|GO:0005759|GO:0016831|GO:0005947|GO:0055114	81055289	chr6	81055230	+	hs|6q14.1	NM_183050	chr6:81055230-81055289	NM_183050	Hs.654441
A_33_P3419419	3.1931	1.67496	3.1931	up	PIK3C2B	phosphatidylinositol-4-phosphate 3-kinase, catalytic subunit type 2 beta	FALSE	phosphatidylinositol-4-phosphate 3-kinase, catalytic subunit type 2 beta [Source:HGNC Symbol;Acc:HGNC:8972] [ENST00000367184]	5287	GO:0005515|GO:0005886|GO:0006661|GO:0036092|GO:0005783|GO:0048015|GO:0005634|GO:0030139|GO:0044281|GO:0001727|GO:0005524|GO:0005829|GO:0046854|GO:0008150|GO:0016303|GO:0043491|GO:0035005|GO:0035091|GO:0005942|GO:0006644	204435959	chr1	204435900	-	hs|1q32.1		chr1:204435959-204435900
A_33_P3395651	2.09815	1.06912	2.09815	up	PCDHGA5	protocadherin gamma subfamily A, 5	FALSE	Homo sapiens protocadherin gamma subfamily A, 5 (PCDHGA5), transcript variant 2, mRNA [NM_032054]	56110	GO:0005886|GO:0005509|GO:0016021|GO:0007156	140746279	chr5	140746220	+	hs|5q31.3	NM_032054	chr5:140746220-140746279	NM_032054	Hs.368160
A_32_P135517	2.3035	1.20383	2.3035	up	lnc-CHST4-3	lnc-CHST4-3:2	FALSE	LNCipedia lincRNA (lnc-CHST4-3), lincRNA [lnc-CHST4-3:2]			71497955	chr16	71497896	+	hs|16q22.2	AK123826	chr16:71497896-71497955		Hs.647355
A_33_P3346083	3.74678	1.90565	3.74678	up	DCDC1	doublecortin domain containing 1	FALSE	Homo sapiens doublecortin domain containing 1 (DCDC1), mRNA [NM_181807]	341019	GO:0035556	31312257	chr11	31312198	-	hs|11p13	NM_181807	chr11:31312257-31312198	NM_181807	Hs.592000
A_21_P0007467	2.72326	1.44533	2.72326	up	LOC102723862	uncharacterized LOC102723862	FALSE	PREDICTED: Homo sapiens uncharacterized LOC102723862 (LOC102723862), transcript variant X1, ncRNA [XR_428989]	102723862		103714445	chr11	103713691	-	hs|11q22.3	XR_428989	chr11:103714445-103713691	XR_428989
A_21_P0014888	2.33043	1.2206	2.33043	up			FALSE	BC009371 adipocyte-specific adhesion molecule {Homo sapiens} (exp=-1; wgp=0; cg=0), partial (13%) [THC2642479]			122955593	chr11	122955534	+	hs|11q24.1		chr11:122955534-122955593
A_33_P3348469	2.02021	1.01451	2.02021	up	ANKRD13C	ankyrin repeat domain 13C	FALSE	Homo sapiens ankyrin repeat domain 13C (ANKRD13C), mRNA [NM_030816]	81573	GO:0010869|GO:0048471|GO:0005783|GO:0005789|GO:0005102|GO:2000209|GO:0006621	70724745	chr1	70724686	-	hs|1p31.1	NM_030816	chr1:70724745-70724686	NM_030816	Hs.744989
A_33_P3228732	2.07104	1.05036	2.07104	up	LINC00887	long intergenic non-protein coding RNA 887	FALSE	Homo sapiens long intergenic non-protein coding RNA 887 (LINC00887), long non-coding RNA [NR_024480]	100131551		194023621	chr3	194023562	-	hs|3q29	NR_024480	chr3:194023621-194023562	NR_024480	Hs.128066
A_24_P178175	2.76133	1.46537	2.76133	up	GGT1	gamma-glutamyltransferase 1	FALSE	Homo sapiens gamma-glutamyltransferase 1 (GGT1), transcript variant 6, mRNA [NM_001288833]	2678	GO:0019369|GO:0005515|GO:0019370|GO:0019344|GO:0006520|GO:0006805|GO:0005886|GO:0006536|GO:0050727|GO:0002682|GO:0006749|GO:0044281|GO:0007283|GO:0031362|GO:0005615|GO:0006691|GO:0003840|GO:0006750|GO:0006751|GO:0006508|GO:0016021|GO:0031638|GO:0070062	25023930	chr22	25023871	+	hs|22q11.23	NM_001288833	chr22:25023871-25023930	NM_001288833	Hs.645535
A_23_P369328	2.50206	1.32312	2.50206	up	C10orf35	chromosome 10 open reading frame 35	FALSE	Homo sapiens chromosome 10 open reading frame 35 (C10orf35), mRNA [NM_145306]	219738	GO:0016021	71393250	chr10	71393191	+	hs|10q22.1	NM_145306	chr10:71393191-71393250	NM_145306	Hs.522992
A_23_P111092	2.05092	1.03627	2.05092	up	OR2H1	olfactory receptor, family 2, subfamily H, member 1	FALSE	Homo sapiens olfactory receptor, family 2, subfamily H, member 1 (OR2H1), mRNA [NM_030883]	26716	GO:0050911|GO:0004984|GO:0007186|GO:0005886|GO:0004930|GO:0016021	29430081	chr6	29430022	+	hs|6p22.1	NM_030883	chr6:29430022-29430081	NM_030883	Hs.740793
A_33_P3417281	2.0531	1.03781	2.0531	up	MUC4	mucin 4, cell surface associated	FALSE	Homo sapiens mucin 4, cell surface associated (MUC4), transcript variant 1, mRNA [NM_018406]	4585	GO:0005796|GO:0005578|GO:0016266|GO:0005615|GO:0031982|GO:0005176|GO:0006493|GO:0007160|GO:0016020|GO:0030197|GO:0030277|GO:0005887|GO:0044267|GO:0070062|GO:0043687	195506369	chr3	195506310	-	hs|3q29	NM_018406	chr3:195506369-195506310	NM_018406	Hs.369646
A_33_P3226810	3.08558	1.62554	3.08558	up	TNFSF10	tumor necrosis factor (ligand) superfamily, member 10	FALSE	Homo sapiens tumor necrosis factor (ligand) superfamily, member 10 (TNFSF10), transcript variant 1, mRNA [NM_003810]	8743	GO:0005515|GO:0032868|GO:0005164|GO:2001238|GO:2001239|GO:0043065|GO:0006919|GO:0005102|GO:0007267|GO:0006915|GO:0005576|GO:0097190|GO:0005125|GO:0005615|GO:0046872|GO:0043280|GO:0007165|GO:0006955|GO:0005887|GO:0090200|GO:0043123|GO:0008584|GO:0070062	172224285	chr3	172224226	-	hs|3q26.31	NM_003810	chr3:172224285-172224226	NM_003810	Hs.478275
A_21_P0011858	2.88865	1.53039	2.88865	up	LINC01412	long intergenic non-protein coding RNA 1412	FALSE	Homo sapiens long intergenic non-protein coding RNA 1412 (LINC01412), long non-coding RNA [NR_110570]	101928455		145336872	chr2	145336813	+	hs|2q22.3		chr2:145336813-145336872	NR_110570	Hs.333693
A_23_P48698	3.44783	1.78569	3.44783	up	ADAM20	ADAM metallopeptidase domain 20	FALSE	Homo sapiens ADAM metallopeptidase domain 20 (ADAM20), mRNA [NM_003814]	8748	GO:0007338|GO:0005886|GO:0006508|GO:0008270|GO:0016021|GO:0007339|GO:0004222|GO:0008237|GO:0032504	70989433	chr14	70989374	-	hs|14q24.2	NM_003814	chr14:70989433-70989374	NM_003814	Hs.177984
A_21_P0005184	2.53017	1.33924	2.53017	up	lnc-WDR27-1	lnc-WDR27-1:7	FALSE	LNCipedia lincRNA (lnc-WDR27-1), lincRNA [lnc-WDR27-1:7]			169827877	chr6	169827818	-	hs|6q27		chr6:169827877-169827818
A_21_P0009442	2.89541	1.53377	2.89541	up	LINC01540	long intergenic non-protein coding RNA 1540	FALSE	Homo sapiens long intergenic non-protein coding RNA 1540 (LINC01540), transcript variant 1, long non-coding RNA [NR_110429]	100505592		3478936	chr18	3478877	+	hs|18p11.31	NR_110429	chr18:3478877-3478936	NR_110429	Hs.635114
A_33_P3235491	2.06396	1.04542	2.06396	up			FALSE				29877703	chr22	29877644	-	hs|22q12.2		chr22:029877703-029877644
A_21_P0001613	2.64893	1.40541	2.64893	up	lnc-NUAK2-1	lnc-NUAK2-1:1	FALSE	LNCipedia lincRNA (lnc-NUAK2-1), lincRNA [lnc-NUAK2-1:1]			205251660	chr1	205251601	-	hs|1q32.1		chr1:205251660-205251601
A_21_P0000892	2.06918	1.04906	2.06918	up	LOC100507351	uncharacterized LOC100507351	FALSE	Homo sapiens uncharacterized LOC100507351 (LOC100507351), long non-coding RNA [NR_040050]	100507351		75560978	chr17	75560919	+	hs|17q25.3	NR_040050	chr17:75560919-75560978	NR_040050	Hs.514518
A_21_P0011875	2.36489	1.24177	2.36489	up	LOC102725407	uncharacterized LOC102725407	FALSE		102725407		223186349	chr2	223186290	+	hs|2q36.1	XR_425534	chr2:223186290-223186349	XR_425534	Hs.732732
A_21_P0009208	5.81397	2.53952	5.81397	up	lnc-TIMM22-1	lnc-TIMM22-1:1	FALSE	LNCipedia lincRNA (lnc-TIMM22-1), lincRNA [lnc-TIMM22-1:1]			896945	chr17	896886	+	hs|17p13.3		chr17:896886-896945
A_23_P217178	2.98821	1.57928	2.98821	up	MAGEC1	melanoma antigen family C, 1	FALSE	Homo sapiens melanoma antigen family C, 1 (MAGEC1), mRNA [NM_005462]	9947	GO:0005515	140996956	chrX	140996897	+	hs|Xq27.2	NM_005462	chrX:140996897-140996956	NM_005462	Hs.132194
A_23_P140967	2.33836	1.2255	2.33836	up	MEFV	Mediterranean fever	FALSE	Homo sapiens Mediterranean fever (MEFV), transcript variant 1, mRNA [NM_000243]	4210	GO:2001056|GO:0005875|GO:0005874|GO:0032691|GO:0071641|GO:0003779|GO:0005634|GO:0001726|GO:0030027|GO:0035872|GO:0005829|GO:0006954|GO:0032695|GO:0050728|GO:0045087|GO:0008270	3292835	chr16	3292776	-	hs|16p13.3	NM_000243	chr16:3292835-3292776	NM_000243	Hs.632221
A_21_P0000398	2.52491	1.33623	2.52491	up	SNORD117	small nucleolar RNA, C/D box 117	FALSE	Homo sapiens small nucleolar RNA, C/D box 117 (SNORD117), small nucleolar RNA [NR_003140]	692233		31504213	chr6	31504154	-	hs|6p21.33	NR_003140	chr6:31504213-31504154	NR_003140
A_33_P3418380	4.10825	2.03852	4.10825	up			FALSE				34724625	chr16	34724566	+	hs|16p11.1		chr16:034724566-034724625
A_23_P128084	2.50034	1.32212	2.50034	up	ITGA7	integrin, alpha 7	FALSE	Homo sapiens integrin, alpha 7 (ITGA7), transcript variant 2, mRNA [NM_002206]	3679	GO:0031594|GO:0046982|GO:0005886|GO:0009986|GO:0008360|GO:0048514|GO:0034677|GO:0035987|GO:0046872|GO:0042383|GO:0005737|GO:0005178|GO:0007517|GO:0007160|GO:0016477|GO:0007229|GO:0007519|GO:0030198|GO:0043236|GO:0034113|GO:0005927	56078479	chr12	56078420	-	hs|12q13.2	NM_002206	chr12:56078479-56078420	NM_002206	Hs.524484
A_23_P140146	2.22325	1.15267	2.22325	up	IFI27L2	interferon, alpha-inducible protein 27-like 2	FALSE	Homo sapiens interferon, alpha-inducible protein 27-like 2 (IFI27L2), mRNA [NM_032036]	83982	GO:0016021	94594217	chr14	94594158	-	hs|14q32.12	NM_032036	chr14:94594217-94594158	NM_032036	Hs.94695
A_21_P0004341	2.72001	1.44361	2.72001	up	lnc-C5orf47-2	lnc-C5orf47-2:1	FALSE	LNCipedia lincRNA (lnc-C5orf47-2), lincRNA [lnc-C5orf47-2:1]			173670220	chr5	173670161	+	hs|5q35.2		chr5:173670161-173670220
A_33_P3231252	2.29027	1.19552	2.29027	up	NHLH2	nescient helix loop helix 2	FALSE	Homo sapiens nescient helix loop helix 2 (NHLH2), transcript variant 1, mRNA [NM_005599]	4808	GO:0005515|GO:0001102|GO:0005667|GO:0007617|GO:0005634|GO:0042698|GO:0007417|GO:0003677|GO:0006351|GO:0030154|GO:0051091|GO:0045944|GO:0046983	116379373	chr1	116379314	-	hs|1p13.1	NM_005599	chr1:116379373-116379314	NM_005599	Hs.46296
A_21_P0012436	2.09659	1.06805	2.09659	up	XLOC_l2_010139		FALSE	BROAD Institute lincRNA (XLOC_l2_010139), lincRNA [TCONS_l2_00019209]			27674957	chr3	27674898	-	hs|3p24.1		chr3:27674957-27674898
A_33_P3361546	2.24206	1.16483	2.24206	up	TFAP2A	transcription factor AP-2 alpha (activating enhancer binding protein 2 alpha)	FALSE	Homo sapiens transcription factor AP-2 alpha (activating enhancer binding protein 2 alpha) (TFAP2A), transcript variant 2, mRNA [NM_001032280]	7020	GO:0005515|GO:0000987|GO:0044212|GO:0006366|GO:0000981|GO:0007605|GO:0000982|GO:0021559|GO:0042803|GO:0043231|GO:0009880|GO:0043524|GO:0010944|GO:0043525|GO:0014032|GO:0021623|GO:0005813|GO:0000976|GO:0001105|GO:0005794|GO:0030335|GO:0030501|GO:0042472|GO:0001106|GO:0003404|GO:0003713|GO:0042059|GO:0010842|GO:0000122|GO:0000978|GO:0003409|GO:0000979|GO:0045595|GO:0005654|GO:0000980|GO:0045893|GO:…	10397085	chr6	10397026	-	hs|6p24.3	NM_001032280	chr6:10397085-10397026	NM_001032280	Hs.519880
A_23_P130735	2.11486	1.08057	2.11486	up	SLC6A16	solute carrier family 6, member 16	FALSE	Homo sapiens solute carrier family 6, member 16 (SLC6A16), mRNA [NM_014037]	28968	GO:0005622|GO:0005328|GO:0005326|GO:0006836|GO:0016021|GO:0055085	49793142	chr19	49793083	-	hs|19q13.33	NM_014037	chr19:49793142-49793083	NM_014037	Hs.130949
A_33_P3364493	2.13375	1.09339	2.13375	up			FALSE				68410624	chr9	68410565	-	hs|9q13		chr9:068410624-068410565
A_32_P150632	2.14877	1.10351	2.14877	up	ANXA11	annexin A11	FALSE	annexin A11 [Source:HGNC Symbol;Acc:HGNC:535] [ENST00000438331]	311	GO:0005515|GO:0006909|GO:0042470|GO:0008429|GO:0005509|GO:0042581|GO:0005819|GO:0042582|GO:0030496|GO:0005635|GO:0007109|GO:0045335|GO:0005544|GO:0051592|GO:0044548|GO:0005737|GO:0016020|GO:0023026|GO:0005654|GO:0070062|GO:0048306	81911255	chr10	81911196	-	hs|10q22.3		chr10:81911255-81911196
A_21_P0013894	2.19414	1.13366	2.19414	up	XLOC_l2_015938		FALSE	BROAD Institute lincRNA (XLOC_l2_015938), lincRNA [TCONS_l2_00030929]			10036168	chrY	10035807	-	hs|Yp11.2		chrY:10036168-10035807
A_21_P0008473	6.53926	2.70913	6.53926	up	lnc-GALC-3	lnc-GALC-3:4	FALSE	LNCipedia lincRNA (lnc-GALC-3), lincRNA [lnc-GALC-3:4]			88039919	chr14	88039860	-	hs|14q31.3		chr14:88039919-88039860
A_33_P3389827	2.48091	1.31087	2.48091	up	PROM2	prominin 2	FALSE	Homo sapiens prominin 2 (PROM2), transcript variant 1, mRNA [NM_001165978]	150696	GO:0060170|GO:0009986|GO:0031528|GO:0031410|GO:0042995|GO:0044393|GO:0043088|GO:2001287|GO:0005902|GO:0005929|GO:0016323|GO:0016324|GO:0031346|GO:0005887|GO:0015485|GO:0048550|GO:2000369|GO:0071914|GO:0001934|GO:0045121|GO:0070062	95956061	chr2	95956002	+	hs|2q11.1	NM_001165978	chr2:95956002-95956061	NM_001165978	Hs.469313
A_33_P3230723	2.36508	1.24189	2.36508	up	KIF1B	kinesin family member 1B	FALSE	Homo sapiens kinesin family member 1B (KIF1B), transcript variant 2, mRNA [NM_183416]	23095	GO:0005515|GO:0008017|GO:0043005|GO:0005871|GO:0006200|GO:0005875|GO:0005874|GO:0006915|GO:0031410|GO:0007274|GO:0003777|GO:0005524|GO:0007270|GO:0030705|GO:0005739|GO:0047497|GO:0008574|GO:0019894|GO:0008089|GO:0016192|GO:0016887|GO:0030659|GO:0007018	10364606	chr1	10364547	+	hs|1p36.22	NM_183416	chr1:10364547-10364606	NM_183416	Hs.97858
A_33_P3280360	3.10053	1.63252	3.10053	up	LOC100133857	uncharacterized LOC100133857	FALSE	Homo sapiens cDNA FLJ45691 fis, clone FEBRA2002260. [AK128800]	100133857		45378939	chr20	45378880	-	hs|20q13.12	AK128800	chr20:45378939-45378880		Hs.632266
A_21_P0014002	2.38101	1.25157	2.38101	up	XLOC_l2_012082		FALSE	BROAD Institute lincRNA (XLOC_l2_012082), lincRNA [TCONS_l2_00023776]			70519725	chr5	70519666	-	hs|5q13.2		chr5:70519725-70519666		Hs.689293
A_33_P3235098	3.15144	1.65601	3.15144	up	NUTM2D	NUT family member 2D	FALSE	Homo sapiens NUT family member 2D (NUTM2D), non-coding RNA [NR_075100]	728130		89127677	chr10	89127618	+	hs|10q23.2	NR_075100	chr10:89127618-89127677	NR_075100	Hs.701044
A_21_P0002730	2.87237	1.52224	2.87237	up	LOC102725370	uncharacterized LOC102725370	FALSE	PREDICTED: Homo sapiens uncharacterized LOC102725370 (LOC102725370), transcript variant X3, ncRNA [XR_425587]	102725370		27901764	chr3	27901705	+	hs|3p24.1	XR_425587	chr3:27901705-27901764	XR_425587
A_23_P404494	2.46711	1.30282	2.46711	up	IL7R	interleukin 7 receptor	FALSE	Homo sapiens interleukin 7 receptor (IL7R), transcript variant 1, mRNA [NM_002185]	3575	GO:0005515|GO:0033089|GO:0008361|GO:0005886|GO:0004917|GO:0005576|GO:0003823|GO:0048535|GO:0048872|GO:0010628|GO:0000902|GO:0007165|GO:0006955|GO:0030217|GO:0042100|GO:0001915|GO:0038111|GO:0016049|GO:0016021|GO:0000018|GO:0009897|GO:0002377|GO:0007166	35876840	chr5	35876781	+	hs|5p13.2	NM_002185	chr5:35876781-35876840	NM_002185	Hs.591742
A_21_P0008521	2.05012	1.03571	2.05012	up	lnc-CHGA-1	lnc-CHGA-1:4	FALSE	LNCipedia lincRNA (lnc-CHGA-1), lincRNA [lnc-CHGA-1:4]			93359622	chr14	93358184	+	hs|14q32.12		chr14:93358184-93359622
A_23_P24543	3.23933	1.6957	3.23933	up	NXPE1	neurexophilin and PC-esterase domain family, member 1	FALSE	Homo sapiens neurexophilin and PC-esterase domain family, member 1 (NXPE1), mRNA [NM_152315]	120400	GO:0005576	114392568	chr11	114392509	-	hs|11q23.2	NM_152315	chr11:114392568-114392509	NM_152315	Hs.721328
A_33_P3247342	3.2148	1.68473	3.2148	up	ANO7	anoctamin 7	FALSE	Homo sapiens anoctamin 7 (ANO7), transcript variant NGEP-S, mRNA [NM_001001666]	50636	GO:0006821|GO:0030054|GO:0005886|GO:0005783|GO:0017128|GO:0005634|GO:0055085|GO:0005829|GO:0005622|GO:0034220|GO:0006869|GO:0005229|GO:0016021	242135579	chr2	242135520	+	hs|2q37.3	NM_001001666	chr2:242135520-242135579	NM_001001666	Hs.163909
A_33_P3300262	2.00272	1.00196	2.00272	up	VIT	vitrin	FALSE	Homo sapiens vitrin (VIT), transcript variant 5, mRNA [NM_001177972]	5212	GO:0030198|GO:0010811|GO:0005539|GO:0005614	36986818	chr2	36986759	+	hs|2p22.2	NM_001177972	chr2:36986759-36986818	NM_001177972	Hs.137415
A_21_P0003308	2.53049	1.33942	2.53049	up	lnc-MCCC1-1	lnc-MCCC1-1:1	FALSE	AF292100 RP42 protein {Homo sapiens} (exp=-1; wgp=0; cg=0), partial (34%) [THC2670542]			182703645	chr3	182698701	-	hs|3q26.33		chr3:182703645-182698701
A_33_P3315074	2.24005	1.16353	2.24005	up			FALSE				35834215	chr22	35834156	+	hs|22q12.3		chr22:035834156-035834215
A_32_P528311	2.04484	1.03199	2.04484	up	RTN4RL2	reticulon 4 receptor-like 2	FALSE	Homo sapiens reticulon 4 receptor-like 2 (RTN4RL2), mRNA [NM_178570]	349667	GO:0031103|GO:0009986|GO:0045121|GO:0004872|GO:0046658|GO:0009897|GO:0070062	57235353	chr11	57235294	+	hs|11q12.1	NM_178570	chr11:57235294-57235353	NM_178570	Hs.502618
A_21_P0008954	2.70224	1.43416	2.70224	up	lnc-SETD6-8	lnc-SETD6-8:1	FALSE	LNCipedia lincRNA (lnc-SETD6-8), lincRNA [lnc-SETD6-8:1]			62164547	chr16	62164488	+	hs|16q21		chr16:62164488-62164547
A_21_P0009650	3.1308	1.64653	3.1308	up	LOC100652911	uncharacterized LOC100652911	FALSE	PREDICTED: Homo sapiens uncharacterized LOC100652911 (LOC100652911), ncRNA [XR_132655]	100652911		35398927	chr19	35398868	+	hs|19q13.11	XR_132655	chr19:35398868-35398927	XR_132655	Hs.292009
A_21_P0006439	2.21048	1.14436	2.21048	up	lnc-SLC25A6-1	lnc-SLC25A6-1:1	FALSE	ALU2_HUMAN (P39189) Alu subfamily SB sequence contamination warning entry, partial (11%) [THC2723724]			1516106	chrX	1516047	-	hs|Xp22.33		chrX:1516106-1516047
A_23_P128362	6.44171	2.68744	6.44171	up	MYBPC1	myosin binding protein C, slow type	FALSE	Homo sapiens myosin binding protein C, slow type (MYBPC1), transcript variant 2, mRNA [NM_206819]	4604	GO:0005515|GO:0032982|GO:0030049|GO:0003779|GO:0030016|GO:0008307|GO:0007155|GO:0031432|GO:0005829	102071894	chr12	102071128	+	hs|12q23.2	NM_206819	chr12:102071128-102071894	NM_206819	Hs.654589
A_33_P3295650	2.98345	1.57698	2.98345	up	APBA1	amyloid beta (A4) precursor protein-binding, family A, member 1	FALSE	Homo sapiens amyloid beta (A4) precursor protein-binding, family A, member 1 (APBA1), mRNA [NM_001163]	320	GO:0010468|GO:0005515|GO:0048471|GO:0005794|GO:0005886|GO:0014051|GO:0005546|GO:0007268|GO:0005634|GO:0030165|GO:0032403|GO:0014047|GO:0001701|GO:0006886|GO:0008021|GO:0007399|GO:0043234|GO:0001540|GO:0006461|GO:0035264|GO:0008088|GO:0007626|GO:0007155	72045529	chr9	72045470	-	hs|9q21.11	NM_001163	chr9:72045529-72045470	NM_001163	Hs.171939
A_21_P0009161	3.64712	1.86676	3.64712	up	LOC101928475	uncharacterized LOC101928475	FALSE	PREDICTED: Homo sapiens uncharacterized LOC101928475 (LOC101928475), ncRNA [XR_243596]	101928475		14955593	chr17	14955534	+	hs|17p12	XR_243596	chr17:14955534-14955593	XR_243596	Hs.638944
A_33_P3297587	3.64944	1.86767	3.64944	up	LINC00244	long intergenic non-protein coding RNA 244	FALSE	Homo sapiens long intergenic non-protein coding RNA 244 (LINC00244), long non-coding RNA [NR_024119]	64433		156333795	chr7	156333736	+	hs|7q36.3	NR_024119	chr7:156333736-156333795	NR_024119	Hs.404170
A_23_P218282	2.53228	1.34043	2.53228	up	ZSCAN32	zinc finger and SCAN domain containing 32	FALSE	Homo sapiens zinc finger and SCAN domain containing 32 (ZSCAN32), transcript variant 2, mRNA [NM_017810]	54925	GO:0005515|GO:0006366|GO:0006357|GO:0000981|GO:0005634|GO:0003677|GO:0046872	3432833	chr16	3432774	-	hs|16p13.3	NM_017810	chr16:3432833-3432774	NM_017810	Hs.592078
A_33_P3322388	2.17608	1.12173	2.17608	up	SPRR2D	small proline-rich protein 2D	FALSE	Homo sapiens small proline-rich protein 2D (SPRR2D), mRNA [NM_006945]	6703	GO:0005737|GO:0008544|GO:0031424|GO:0001533	153012663	chr1	153012604	-	hs|1q21.3	NM_006945	chr1:153012663-153012604	NM_006945	Hs.505327
A_21_P0005129	2.41594	1.27259	2.41594	up	lnc-GJA1-3	lnc-GJA1-3:2	FALSE	LNCipedia lincRNA (lnc-GJA1-3), lincRNA [lnc-GJA1-3:2]			122243943	chr6	122243884	+	hs|6q22.31		chr6:122243884-122243943		Hs.695884
A_33_P3813561	2.42867	1.28017	2.42867	up	LOC283728	uncharacterized LOC283728	FALSE	Homo sapiens cDNA FLJ38298 fis, clone FCBBF3017059. [AK095617]	283728		84943847	chr15	84943788	-	hs|15q25.2	AK095617	chr15:84943847-84943788		Hs.635026
A_23_P56578	2.57312	1.36352	2.57312	up	VIT	vitrin	FALSE	Homo sapiens vitrin (VIT), transcript variant 1, mRNA [NM_053276]	5212	GO:0030198|GO:0010811|GO:0005539|GO:0005614	37041825	chr2	37041766	+	hs|2p22.2	NM_053276	chr2:37041766-37041825	NM_053276	Hs.137415
A_33_P3376075	2.24846	1.16894	2.24846	up			FALSE				45687734	chr11	45687675	+	hs|11p11.2		chr11:045687675-045687734
A_21_P0003027	2.10279	1.0723	2.10279	up	LOC644662	uncharacterized LOC644662	FALSE	PREDICTED: Homo sapiens uncharacterized LOC644662 (LOC644662), ncRNA [XR_171034]	644662		126010173	chr3	126010114	+	hs|3q21.3	XR_171034	chr3:126010114-126010173	XR_171034	Hs.518222
A_21_P0010997	2.13603	1.09493	2.13603	up	LOC283140	uncharacterized LOC283140	FALSE		283140		112162424	chr11	112162365	+	hs|11q23.1	XM_006709955	chr11:112162365-112162424	XM_006709955	Hs.503862
A_21_P0005175	2.00395	1.00285	2.00395	up	lnc-HDAC2-4	lnc-HDAC2-4:2	FALSE	LNCipedia lincRNA (lnc-HDAC2-4), lincRNA [lnc-HDAC2-4:2]			113667269	chr6	113667210	-	hs|6q21		chr6:113667269-113667210
A_23_P415021	2.01704	1.01224	2.01704	up	METTL7A	methyltransferase like 7A	FALSE	Homo sapiens methyltransferase like 7A (METTL7A), mRNA [NM_014033]	25840	GO:0005811|GO:0005737|GO:0016020|GO:0005783|GO:0008757|GO:0032259|GO:0070062	51326160	chr12	51326101	+	hs|12q13.12	NM_014033	chr12:51326101-51326160	NM_014033	Hs.744021
A_21_P0001716	3.82228	1.93443	3.82228	up	lnc-MTR-1	lnc-MTR-1:1	FALSE	LNCipedia lincRNA (lnc-MTR-1), lincRNA [lnc-MTR-1:1]			237076711	chr1	237076652	+	hs|1q43		chr1:237076652-237076711
A_33_P3235029	2.48641	1.31407	2.48641	up			FALSE	MGC3.5.1.2.1.H09.F.1 NIH_MGC_331 Homo sapiens cDNA clone MGC3.5.1.2.1.H09, mRNA sequence [DR731407]			20908933	chr14	20908874	+	hs|14q11.2	DR731407	chr14:20908874-20908933		Hs.556125
A_24_P927325	2.11865	1.08315	2.11865	up	C2CD3	C2 calcium-dependent domain containing 3	FALSE	Homo sapiens C2 calcium-dependent domain containing 3 (C2CD3), transcript variant 2, mRNA [NM_015531]	26005	GO:0005515|GO:0021997|GO:0005813|GO:0006996|GO:0005814|GO:0034451|GO:0035058|GO:0001701|GO:0036064|GO:0005829|GO:0001947|GO:0030162|GO:0007420|GO:0008589|GO:0016485|GO:0071539|GO:0021915|GO:0042733	73745605	chr11	73745546	-	hs|11q13.4	NM_015531	chr11:73745605-73745546	NM_015531	Hs.694798
[truncated: 2,475 more rows]
